# Supplementary material for: Heterochromatin-dependent transcription of satellite DNAs in the Drosophila melanogaster female germline
Source: eLife journal article supplement (doi:10.7554/elife.62375), 2021-07-13

Figure 1-figure supplement 2

A RNA FISH ovary

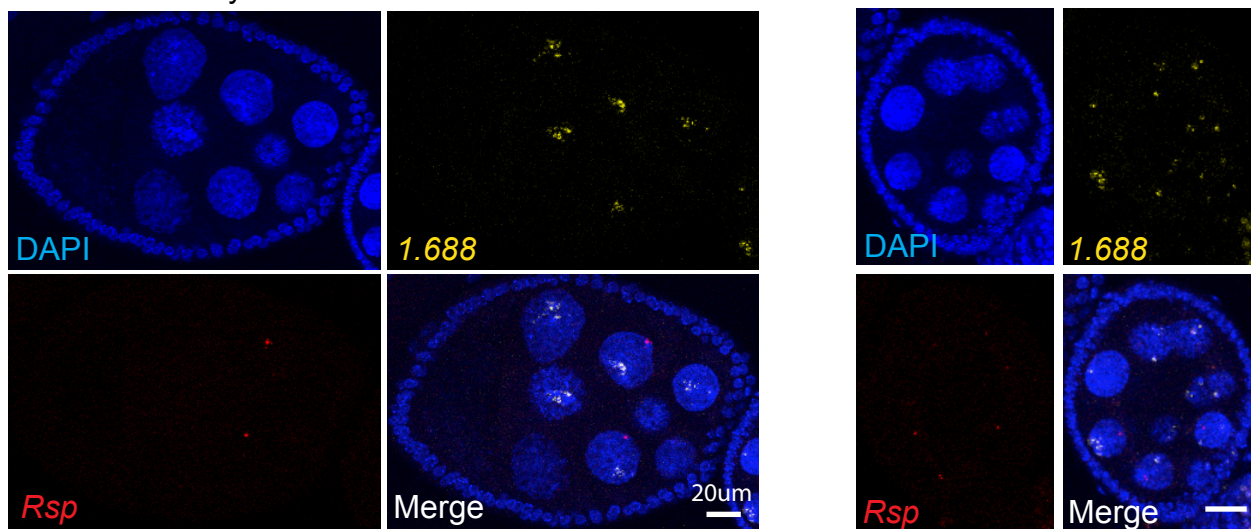

B RNaseA treated ovary (prior to probe hybridization)

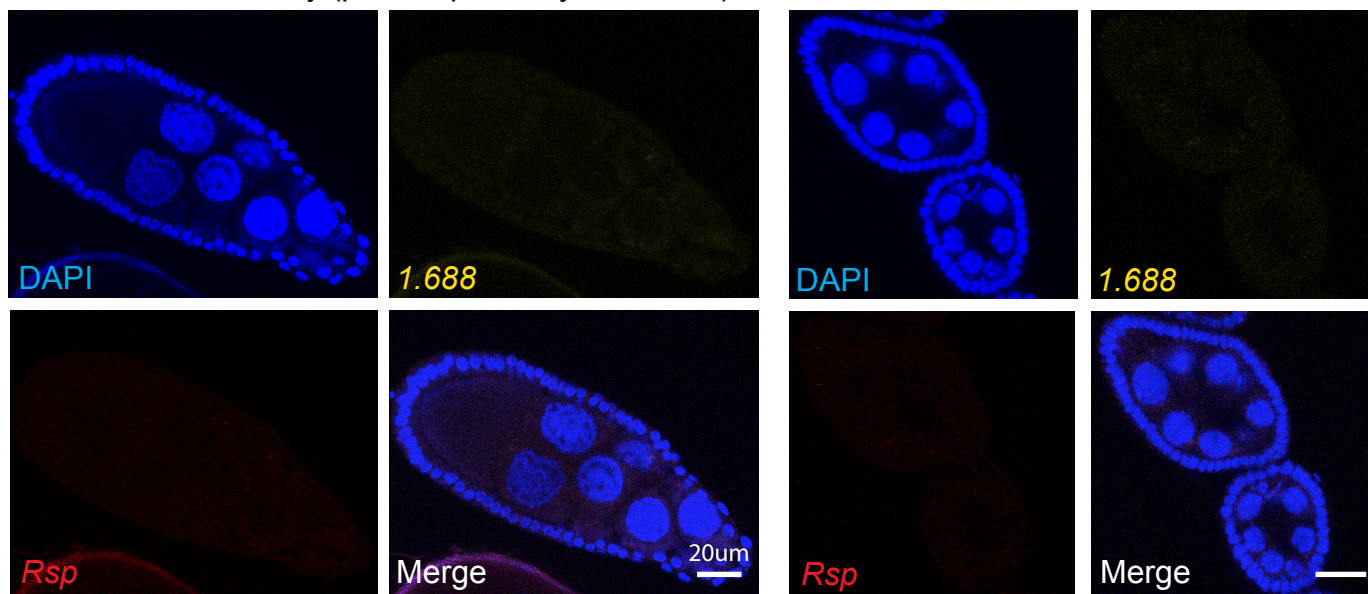

C RNaseH treated ovary (after probe hybridization)

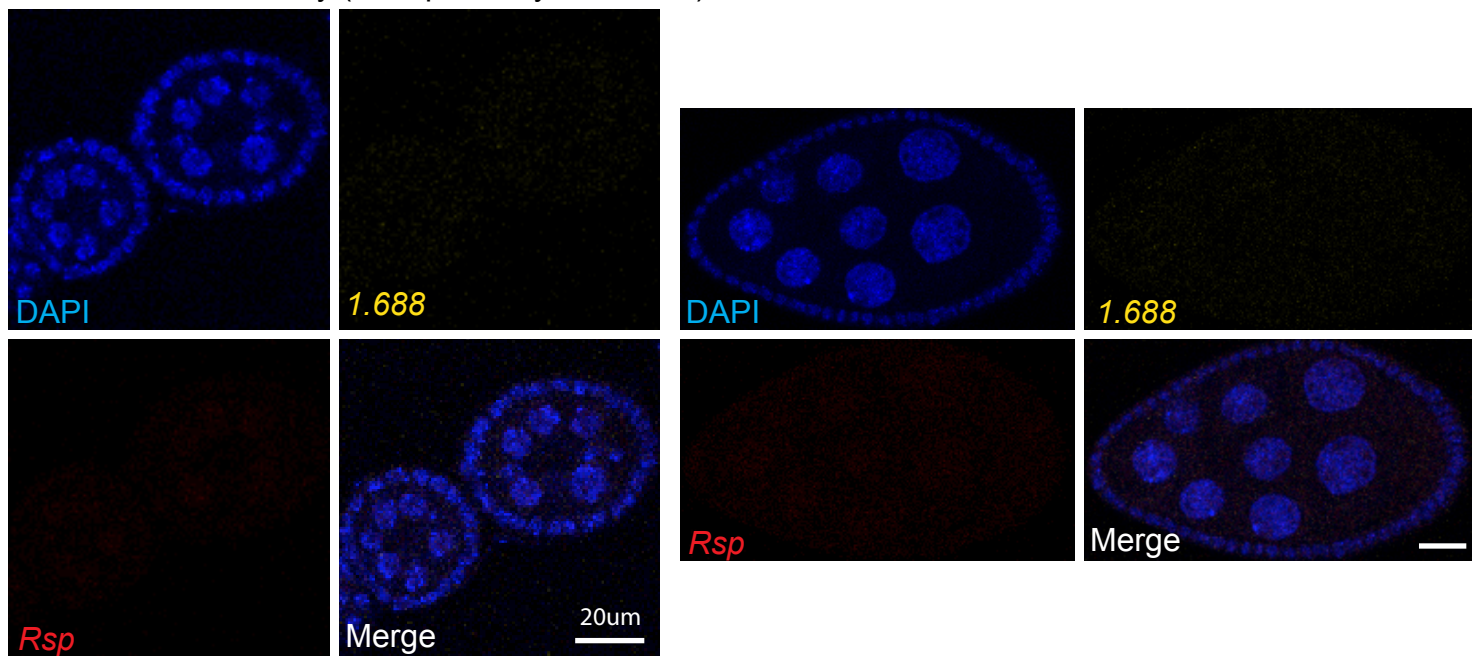

Supplement: supp [file elife-62375-supp-v1.zip]
