# Supplementary material for: Heterochromatin-dependent transcription of satellite DNAs in the Drosophila melanogaster female germline
Source: eLife journal article supplement (doi:10.7554/elife.62375), 2021-07-13
Supplement: supp [file elife-62375-supp-v1.zip]

Archive with 35 entries (35 files):
- elife_poa_e62375_Transparent_Reporting_File.pdf
- elife_poa_e62375_Figure_1_figure_supplement_1.pdf
- elife_poa_e62375_Figure_1_figure_supplement_2.pdf
- elife_poa_e62375_Figure_2_figure_supplement_1.pdf
- elife_poa_e62375_Figure_2_figure_supplement_2.pdf
- elife_poa_e62375_Figure_2_figure_supplement_3.pdf
- elife_poa_e62375_Figure_2_figure_supplement_4.pdf
- elife_poa_e62375_Figure_2_figure_supplement_5.pdf
- elife_poa_e62375_Figure_3_figire_supplement_1.pdf
- elife_poa_e62375_Figure_3_figure_supplement_2.pdf
- elife_poa_e62375_Figure_3_figure_supplement_3.pdf
- elife_poa_e62375_Figure_4_figure_supplement_1.pdf
- elife_poa_e62375_Supplementary_file_1.xlsx
- elife_poa_e62375_Supplementary_file_2.docx
- elife_poa_e62375_Supplementary_file_3.docx
- elife_poa_e62375_Supplementary_file_4.docx
- elife_poa_e62375_Supplementary_file_5.xlsx
- elife_poa_e62375_Supplementary_file_6.xlsx
- elife_poa_e62375_Supplementary_file_7.xlsx
- elife_poa_e62375_Supplementary_file_8.csv
- elife_poa_e62375_Supplementary_file_9.csv
- elife_poa_e62375_Supplementary_file_10.xlsx
- elife_poa_e62375_Supplementary_file_11.xlsx
- elife_poa_e62375_Figure_1_source_data_1.xlsx
- elife_poa_e62375_Figure_2_figure_supplement_1_source_data_1.xlsx
- elife_poa_e62375_Figure_2_figure_supplement_4_source_data_1.xlsx
- elife_poa_e62375_Figure_2_source_data_1.xlsx
- elife_poa_e62375_Figure_2_source_data_2.xlsx
- elife_poa_e62375_Figure_2_source_data_3.xlsx
- elife_poa_e62375_Figure_3_source_data_1.xlsx
- elife_poa_e62375_Figure_3_figure_supplement_2_source_data_1.xlsx
- elife_poa_e62375_Figure_3_figure_supplement_3_source_data_1.xlsx
- elife_poa_e62375_Figure_4_figure_supplement_1_source_data_1.csv
- elife_poa_e62375_Figure_4_source_data_1.xlsx
- elife_poa_e62375_Figure_4_source_data_2.xlsx
