# Supplementary material for: Heterochromatin-dependent transcription of satellite DNAs in the Drosophila melanogaster female germline
Source: eLife journal article supplement (doi:10.7554/elife.62375), 2021-07-13
Supplement: supp [file elife-62375-supp-v1.zip › elife_poa_e62375_Figure_1_source_data_1.xlsx]

## Sheet: tissues
Figure 1-source data. SatDNA transcription level in various developmental stages and tissues. Data from modENCODE (Graveley, et al. 2011; Brown, et al. 2014)
#repeat	#tissue	#count in RPM
Rsp	ovary	1.74
Rsp	testes	0.46
Rsp	carcass	1.22
Rsp	head	1.56
Rsp	ovary	1.46
Rsp	testes	1.5
Rsp	carcass	0.97
Rsp	head	1.57
Rsp	ovary	1.54
Rsp	testes	0.25
Rsp	carcass	0.86
Rsp	head	1.36
Rsp	head	2.54
Rsp	head	2.3
Rsp	head	1.61
1.688	ovary	37.17
1.688	testes	25.09
1.688	carcass	137.87
1.688	head	191.56
1.688	ovary	33.08
1.688	testes	29.56
1.688	carcass	122.89
1.688	head	211.17
1.688	ovary	25.42
1.688	testes	23.55
1.688	carcass	124.27
1.688	head	228.41
1.688	head	217.12
1.688	head	316.69
1.688	head	333.75

## Sheet:  developmental stages
Figure 1-source data. SatDNA transcription level in various developmental stages and tissues. Data from modENCODE (Graveley, et al. 2011; Brown, et al. 2014)
#repeat	#developmental stage	#count in RPM
Rsp	0-2hr	0.21
Rsp	12-14hr	1.04
Rsp	22-24hr	0.64
Rsp	L2	0.47
Rsp	WPP	1.29
Rsp	WPP_24hr	2.08
Rsp	WPP_3d	4.22
Rsp	fem_1d	3.63
Rsp	fem_30d	7.35
Rsp	male_1d	0.62
Rsp	male_30d	2.2
Rsp	0-2hr	0.12
Rsp	12-14hr	1.07
Rsp	22-24hr	0.78
Rsp	L2	0.91
Rsp	WPP	1.07
Rsp	WPP_24hr	2.18
Rsp	WPP_3d	3.62
Rsp	fem_1d	3.34
Rsp	fem_30d	4.71
Rsp	male_1d	0.82
Rsp	male_30d	3.12
Rsp	L2	0.49
1.688	0-2hr	5.96
1.688	12-14hr	115.48
1.688	22-24hr	45.71
1.688	L2	58.5
1.688	WPP	63.18
1.688	WPP_24hr	91.78
1.688	WPP_3d	71.56
1.688	fem_1d	93.94
1.688	fem_30d	128.81
1.688	male_1d	60.21
1.688	male_30d	170.59
1.688	0-2hr	5.89
1.688	12-14hr	113.74
1.688	22-24hr	44.24
1.688	L2	24.49
1.688	WPP	57.09
1.688	WPP_24hr	85.48
1.688	WPP_3d	64.54
1.688	fem_1d	93.28
1.688	fem_30d	97.92
1.688	male_1d	58.09
1.688	male_30d	203.46
1.688	L2	24.79
