# Supplementary material for: Heterochromatin-dependent transcription of satellite DNAs in the Drosophila melanogaster female germline
Source: eLife journal article supplement (doi:10.7554/elife.62375), 2021-07-13
Supplement: supp [file elife-62375-supp-v1.zip › elife_poa_e62375_Figure_2_figure_supplement_1_source_data_1.xlsx]

## Sheet: Sheet1
Figure 2-figure supplement 1-source data. Small RNA levels (RPM) in ovary, testis, head and body (minus head) for 1.688 and Rsp. Data from (Ghildiyal, et al. 2010; Rozhkov, et al. 2010; Fagegaltier, et al. 2014; Mohn, et al. 2014; Quenerch'du, et al. 2016; Andersen, et al. 2017; Parhad, et al. 2017).
#repeat	#tissue	#count in RPM
Rsp	ovary	620.9
Rsp	ovary	737.25
Rsp	ovary	356.47
Rsp	ovary	315
Rsp	testis	305.3
Rsp	testis	463.64
Rsp	head	9.05
Rsp	head	2.64
Rsp	head	0.72
Rsp	whole body	9.87
Rsp	whole body	21.98
1.688	ovary	13376.4
1.688	ovary	12472.2
1.688	ovary	14041.8
1.688	ovary	13945.3
1.688	testis	560.68
1.688	testis	4042.59
1.688	head	333.65
1.688	head	108.91
1.688	head	133.16
1.688	whole body	216.03
1.688	whole body	188.97
