# Supplementary material for: Heterochromatin-dependent transcription of satellite DNAs in the Drosophila melanogaster female germline
Source: eLife journal article supplement (doi:10.7554/elife.62375), 2021-07-13
Supplement: supp [file elife-62375-supp-v1.zip › elife_poa_e62375_Figure_2_figure_supplement_4_source_data_1.xlsx]

## Sheet: Sheet1
Figure 2-figure supplement 4-source data. Percentages of reads mapped to plus and minus strands at all genomic copies of Rsp or 1.688 satellites. Ovary data is from (Mohn, et al. 2014; Andersen, et al. 2017), and testis data is from this study.
tissue	repeat	type	percentage
testes	Rsp	plus_all	0.456432
testes	1.688	plus_all	0.468489
ovary	Rsp	plus_all	0.458824
ovary	1.688	plus_all	0.451969
ovary	Rsp	plus_all	0.584071
ovary	1.688	plus_all	0.471453
ovary	Rsp	plus_all	0.50237
ovary	1.688	plus_all	0.509247
ovary	Rsp	plus_all	0.539326
ovary	1.688	plus_all	0.487707
testes	Rsp	minus_all	0.543568
testes	1.688	minus_all	0.531511
ovary	Rsp	minus_all	0.541176
ovary	1.688	minus_all	0.548031
ovary	Rsp	minus_all	0.415929
ovary	1.688	minus_all	0.528547
ovary	Rsp	minus_all	0.49763
ovary	1.688	minus_all	0.490753
ovary	Rsp	minus_all	0.460674
ovary	1.688	minus_all	0.512293
testes	Rsp	plus_unique	0.358333
testes	1.688	plus_unique	0.377499
ovary	Rsp	plus_unique	0.692308
ovary	1.688	plus_unique	0.358434
ovary	Rsp	plus_unique	0.857143
ovary	1.688	plus_unique	0.405954
ovary	Rsp	plus_unique	0.484848
ovary	1.688	plus_unique	0.525514
ovary	Rsp	plus_unique	0.521739
ovary	1.688	plus_unique	0.483429
testes	Rsp	minus_unique	0.641667
testes	1.688	minus_unique	0.622501
ovary	Rsp	minus_unique	0.307692
ovary	1.688	minus_unique	0.641566
ovary	Rsp	minus_unique	0.142857
ovary	1.688	minus_unique	0.594046
ovary	Rsp	minus_unique	0.515152
ovary	1.688	minus_unique	0.474486
ovary	Rsp	minus_unique	0.478261
ovary	1.688	minus_unique	0.516571
