# Supplementary material for: Heterochromatin-dependent transcription of satellite DNAs in the Drosophila melanogaster female germline
Source: eLife journal article supplement (doi:10.7554/elife.62375), 2021-07-13
Supplement: supp [file elife-62375-supp-v1.zip › elife_poa_e62375_Figure_2_source_data_1.xlsx]

## Sheet: ovary_Rsp
Figure 2-source data 1. size distribution of small RNAs for Rsp and 1.688 in testes and ovaries. Data from (Rozhkov, et al. 2010; Mohn, et al. 2014; Quenerch'du, et al. 2016; Andersen, et al. 2017; Parhad, et al. 2017)
#small RNA size	#count
18	0.07
19	0.28
20	0.84
21	1.94
22	2.08
23	4.77
24	16.35
25	22.92
26	27.03
27	14.91
28	7.93
29	0.84
30	0.03
31	0
32	0.01
18	0.53
19	0.96
20	1.62
21	11.85
22	3.92
23	6.5
24	18.84
25	22.64
26	17.46
27	2.86
28	1.24
29	0.03
30	0
31	0
32	11.54
18	1.08
19	1.36
20	1.51
21	2.65
22	3.57
23	4.89
24	11.22
25	22.47
26	20.66
27	16.2
28	8.92
29	2.8
30	2.24
31	0.29
32	0.14

## Sheet: testis_Rsp
Figure 2-source data 1. size distribution of small RNAs for Rsp and 1.688 in testes and ovaries. Data from (Rozhkov, et al. 2010; Mohn, et al. 2014; Quenerch'du, et al. 2016; Andersen, et al. 2017; Parhad, et al. 2017)
#small RNA size	#count
18	0.18
19	0.18
20	0.82
21	2.45
22	2.51
23	2.06
24	25.29
25	16.14
26	24.03
27	13.37
28	5.04
29	3.63
30	2.57
31	1.14
32	0.56
18	0.6
19	0.44
20	0.38
21	1.04
22	1.8
23	6.44
24	34.83
25	35.26
26	12.88
27	5.08
28	0.87
29	0.33
30	0.05
31	0
32	0
18	0.31
19	0.52
20	1.41
21	3.34
22	4.02
23	5.27
24	19.16
25	27.78
26	12.32
27	20.99
28	3.34
29	1.51
30	0
31	0
32	0

## Sheet: ovary_1.688
Figure 2-source data 1. size distribution of small RNAs for Rsp and 1.688 in testes and ovaries. Data from (Rozhkov, et al. 2010; Mohn, et al. 2014; Quenerch'du, et al. 2016; Andersen, et al. 2017; Parhad, et al. 2017)
#small RNA size	#count
18	0.08
19	0.32
20	0.75
21	1.83
22	2.15
23	5.28
24	13.93
25	23.07
26	20.36
27	18.39
28	12.66
29	1.1
30	0.05
31	0.01
32	0.02
18	0.71
19	1.17
20	1.92
21	6.01
22	4.31
23	9.07
24	18.67
25	24.95
26	11.14
27	4.82
28	1.32
29	0.07
30	0
31	0
32	15.84
18	1.52
19	1.53
20	1.83
21	2.7
22	3.33
23	5.31
24	14.02
25	20.46
26	18.44
27	15.79
28	8.95
29	4.09
30	1.46
31	0.38
32	0.21

## Sheet: testis_1.688
Figure 2-source data 1. size distribution of small RNAs for Rsp and 1.688 in testes and ovaries. Data from (Rozhkov, et al. 2010; Mohn, et al. 2014; Quenerch'du, et al. 2016; Andersen, et al. 2017; Parhad, et al. 2017)
#small RNA size	#count
18	1.72
19	0.34
20	0.7
21	1.27
22	2.88
23	8.81
24	13.17
25	21.72
26	20.38
27	11.58
28	7.33
29	5.93
30	2.22
31	0.97
32	0.98
18	1.59
19	0.8
20	0.8
21	1.23
22	1.85
23	8.08
24	13.32
25	32.45
26	25.96
27	9.48
28	3.29
29	0.69
30	0.15
31	0.01
32	0.28
18	3.44
19	1.22
20	1.07
21	1.81
22	2.93
23	5.78
24	18.39
25	21.68
26	16.61
27	12.03
28	9.22
29	5.81
30	0
31	0
32	0
