# Supplementary material for: Heterochromatin-dependent transcription of satellite DNAs in the Drosophila melanogaster female germline
Source: eLife journal article supplement (doi:10.7554/elife.62375), 2021-07-13
Supplement: supp [file elife-62375-supp-v1.zip › elife_poa_e62375_Figure_2_source_data_2.xlsx]

## Sheet: Rhino
Figure 2-source data 2. Rhino/H3K9me3 ChIP-seq enrichment scores for Rsp, 1.688 heterochromatic loci, piRNA clusters, and euchromatin. Data from (Klenov, et al. 2014; Le Thomas, et al. 2014; Mohn, et al. 2014; Zhang, et al. 2014; Parhad, et al. 2017).
#study	#repeat	#chip/input(RPM)
ovary_Parhad_rhino	Rsp_SAT	10.34
ovary_Parhad_rhino	1pt688.2L_2_260bp_locus	9.32
ovary_Parhad_rhino	1pt688.3L_locus	15.46
ovary_Parhad_rhino	1pt688.Contig101_locus	16.58
ovary_Parhad_rhino	1pt688.Contig9_locus	11.54
ovary_Parhad_rhino	piRNA_cluster_20A	1.14
ovary_Parhad_rhino	piRNA_cluster_flamenco	2.34
ovary_Parhad_rhino	piRNA_cluster_42AB	6.98
ovary_Parhad_rhino	piRNA_cluster_38C1	2.38
ovary_Parhad_rhino	piRNA_cluster_38C2	2.67
ovary_Parhad_rhino	piRNA_cluster_80F	1.91
ovary_Parhad_rhino	Rsp_SAT	5.5
ovary_Parhad_rhino	1pt688.2L_2_260bp_locus	3.73
ovary_Parhad_rhino	1pt688.3L_locus	2.03
ovary_Parhad_rhino	1pt688.Contig101_locus	3.1
ovary_Parhad_rhino	1pt688.Contig9_locus	2.7
ovary_Parhad_rhino	piRNA_cluster_20A	0.88
ovary_Parhad_rhino	piRNA_cluster_flamenco	2.4
ovary_Parhad_rhino	piRNA_cluster_42AB	16.13
ovary_Parhad_rhino	piRNA_cluster_38C1	4.93
ovary_Parhad_rhino	piRNA_cluster_38C2	4.27
ovary_Parhad_rhino	piRNA_cluster_80F	5.04
ovary_Theurkauf_2014_w1_rhino	Rsp_SAT	1.32
ovary_Theurkauf_2014_w1_rhino	1pt688.2L_2_260bp_locus	1.4
ovary_Theurkauf_2014_w1_rhino	1pt688.3L_locus	1.38
ovary_Theurkauf_2014_w1_rhino	1pt688.Contig101_locus	2.92
ovary_Theurkauf_2014_w1_rhino	1pt688.Contig9_locus	1.26
ovary_Theurkauf_2014_w1_rhino	piRNA_cluster_flamenco	1.25
ovary_Theurkauf_2014_w1_rhino	piRNA_cluster_42AB	11.16
ovary_Theurkauf_2014_w1_rhino	piRNA_cluster_38C1	1.49
ovary_Theurkauf_2014_w1_rhino	piRNA_cluster_38C2	2.63
ovary_Theurkauf_2014_w1_rhino	piRNA_cluster_80F	3.26
ovary_Theurkauf_2014_oregonR_rhino	Rsp_SAT	1.64
ovary_Theurkauf_2014_oregonR_rhino	1pt688.2L_2_260bp_locus	2.84
ovary_Theurkauf_2014_oregonR_rhino	1pt688.3L_locus	3.01
ovary_Theurkauf_2014_oregonR_rhino	1pt688.Contig101_locus	5.06
ovary_Theurkauf_2014_oregonR_rhino	1pt688.Contig9_locus	3.43
ovary_Theurkauf_2014_oregonR_rhino	piRNA_cluster_20A	1.18
ovary_Theurkauf_2014_oregonR_rhino	piRNA_cluster_flamenco	1.52
ovary_Theurkauf_2014_oregonR_rhino	piRNA_cluster_42AB	19.51
ovary_Theurkauf_2014_oregonR_rhino	piRNA_cluster_38C1	3.04
ovary_Theurkauf_2014_oregonR_rhino	piRNA_cluster_38C2	7.06
ovary_Theurkauf_2014_oregonR_rhino	piRNA_cluster_80F	8.85
ovary_Mohn_rhino	Rsp_SAT	1.9
ovary_Mohn_rhino	1pt688.2L_2_260bp_locus	1.52
ovary_Mohn_rhino	1pt688.3L_locus	3.5
ovary_Mohn_rhino	1pt688.Contig101_locus	4.28
ovary_Mohn_rhino	1pt688.Contig9_locus	1.65
ovary_Mohn_rhino	piRNA_cluster_20A	2
ovary_Mohn_rhino	piRNA_cluster_flamenco	2.53
ovary_Mohn_rhino	piRNA_cluster_42AB	48.92
ovary_Mohn_rhino	piRNA_cluster_38C1	6.75
ovary_Mohn_rhino	piRNA_cluster_38C2	5.81
ovary_Mohn_rhino	piRNA_cluster_80F	18.86
ovary_Parhad_rhino	euchromatin	1.54
ovary_Parhad_rhino	euchromatin	3.13
ovary_Theurkauf_2014_w1_rhino	euchromatin	1.14
ovary_Theurkauf_2014_oregonR_rhino	euchromatin	0.64
ovary_Mohn_rhino	euchromatin	1.28

## Sheet: H3K9me3
Figure 2-source data 2. Rhino/H3K9me3 ChIP-seq enrichment scores for Rsp, 1.688 heterochromatic loci, piRNA clusters, and euchromatin. Data from (Klenov, et al. 2014; Le Thomas, et al. 2014; Mohn, et al. 2014; Zhang, et al. 2014; Parhad, et al. 2017).
#consition	#repeat	#chip/input(RPM)
ovary_Mohn_H3K9me3	1pt688.2L_2_260bp_locus	11.52
ovary_Mohn_H3K9me3	1pt688.3L_locus	15.03
ovary_Mohn_H3K9me3	1pt688.Contig101_locus	12.16
ovary_Mohn_H3K9me3	1pt688.Contig9_locus	8.37
ovary_Mohn_H3K9me3	Rsp_SAT	5.01
ovary_Mohn_H3K9me3	piRNA_cluster_20A	2.13
ovary_Mohn_H3K9me3	piRNA_cluster_flamenco	5.77
ovary_Mohn_H3K9me3	piRNA_cluster_42AB	10.38
ovary_Mohn_H3K9me3	piRNA_cluster_38C1	4.58
ovary_Mohn_H3K9me3	piRNA_cluster_38C2	3.11
ovary_Mohn_H3K9me3	piRNA_cluster_80F	12.59
ovary_Klenov_H3K9me3	1pt688.2L_2_260bp_locus	1.48
ovary_Klenov_H3K9me3	1pt688.3L_locus	1.38
ovary_Klenov_H3K9me3	1pt688.Contig101_locus	1.14
ovary_Klenov_H3K9me3	1pt688.Contig9_locus	1.24
ovary_Klenov_H3K9me3	Rsp_SAT	2.43
ovary_Klenov_H3K9me3	piRNA_cluster_20A	1.22
ovary_Klenov_H3K9me3	piRNA_cluster_flamenco	4.19
ovary_Klenov_H3K9me3	piRNA_cluster_42AB	2.69
ovary_Klenov_H3K9me3	piRNA_cluster_38C1	2.13
ovary_Klenov_H3K9me3	piRNA_cluster_38C2	1.79
ovary_Klenov_H3K9me3	piRNA_cluster_80F	3.79
ovary_Le.Thomas_H3K9me3	1pt688.2L_2_260bp_locus	4.79
ovary_Le.Thomas_H3K9me3	1pt688.3L_locus	5.28
ovary_Le.Thomas_H3K9me3	1pt688.Contig101_locus	3.67
ovary_Le.Thomas_H3K9me3	1pt688.Contig9_locus	5.68
ovary_Le.Thomas_H3K9me3	Rsp_SAT	4.72
ovary_Le.Thomas_H3K9me3	piRNA_cluster_20A	1.17
ovary_Le.Thomas_H3K9me3	piRNA_cluster_flamenco	5.14
ovary_Le.Thomas_H3K9me3	piRNA_cluster_42AB	4.81
ovary_Le.Thomas_H3K9me3	piRNA_cluster_38C1	3.08
ovary_Le.Thomas_H3K9me3	piRNA_cluster_38C2	2.3
ovary_Le.Thomas_H3K9me3	piRNA_cluster_80F	5.89
ovary_Mohn_H3K9me3	euchromatin	0.82
ovary_Klenov_H3K9me3	euchromatin	0.55
ovary_Le.Thomas_H3K9me3	euchromatin	0.58
