# Supplementary material for: Heterochromatin-dependent transcription of satellite DNAs in the Drosophila melanogaster female germline
Source: eLife journal article supplement (doi:10.7554/elife.62375), 2021-07-13
Supplement: supp [file elife-62375-supp-v1.zip › elife_poa_e62375_Figure_2_source_data_3.xlsx]

## Sheet: replicate 1
Figure 2-source data 3. Rhino ChIP-seq enrichment scores for all repeats in the genome. Data from (Mohn, et al. 2014; Zhang, et al. 2014; Parhad, et al. 2017).
#repeat	#chip/input(RPM)
(AGTTTA)n	77
(TAATTAT)n	73
Copia-5_DWil-I	72
(TATAACA)n	71
(TACAAT)n	70
Mariner-7_DEl	60
Mariner-4_DRh	59.5
(ATTATGT)n	59
Outcast-1_DBi	57
(ATTTTAC)n	56
(ATAGTAT)n	55
(CATACGGA)n	52
(ATAATT)n	51.8
I-5_DK	48
(TAATTG)n	46
(TATGATT)n	45
(TTGTAAT)n	44
Gypsy-26_DPse-I	42.67
(AAATAT)n	42
Helitron-N1_DAn	41.5
(TTGTTTA)n	41
Jockey-3_DEu	40.67
Gypsy22-I_Dpse	40.4
(AGCGAT)n	40
I-5_DBi	39.6
(ATAATC)n	39.5
(TATTATCA)n	39
R1-1_DPer	39
(TATTCAT)n	37
(AATGATA)n	36.5
(TGTAATA)n	36
Gypsy-18_DWil-I	36
(TATTTAA)n	35.33
(AATAGT)n	35
(ATACTAT)n	35
(CTCTAGA)n	35
(GCTGAAT)n	35
(GTTATTA)n	35
(TACGAT)n	35
(TATCT)n	35
Gypsy-11_DVir-I	35
Gypsy-1_DVir-I	34.33
(ATCTTAT)n	34
(TTCATTTCA)n	33.5
Gypsy-24_DBp-I	33.5
(CTATC)n	33
(GAGATTT)n	33
(GTAATT)n	33
(TAAGATT)n	33
(TCGCT)n	33
Gypsy-2_DRh-I	32.5
Gypsy-8_DEl-LTR	32.25
BEL-3_DBp-I	32
(TTATGT)n	31.5
(AAAGG)n	31
(ATAATTG)n	31
(ATATGTA)n	31
(ATTCTGAA)n	31
(CTACAT)n	31
(TAATTTT)n	31
(TTCACTT)n	31
Helitron-1_DK	31
(ATTTTCA)n	30.5
(AAACTT)n	30
(AATCATA)n	30
(AGCTCAAC)n	30
(CCAGATAC)n	30
(GAATGGA)n	30
(GAGGACT)n	30
(GGTTACT)n	30
(TAGTTTT)n	30
(TATTAC)n	30
Gypsy-10_DAn-I	30
(AATCAGA)n	29
(TACTC)n	29
(TATCCA)n	29
(TGCTTAT)n	29
Mariner-24_DF	28.5
Gypsy-2_DRh-LTR	28.29
(ATTCT)n	28
(ATTTAAT)n	28
(GATATGT)n	28
(GGAACGA)n	28
(GGATTA)n	28
(TATTAAG)n	28
(TTAATAT)n	28
Copia1-I_Dpse	27.83
Jockey-4_DK	27.5
(AATTTAT)n	27.2
(ATTAAGA)n	27
(ATTACT)n	27
(GAAAATG)n	27
(GTAATTG)n	27
(TAAATA)n	27
(TATTAGT)n	27
(TCTCGAA)n	27
(TTAGATT)n	27
Gypsy-14_DTa-I	27
Gypsy-22_DY-I	27
I-1_DEl	26.8
Gypsy-46_DEl-LTR	26.5
(AGTAGAA)n	26
(ATTAATC)n	26
(CTATA)n	26
(TAACATT)n	26
(TGCAT)n	26
(TTTACAA)n	26
Copia-2_Deu-LTR	26
Polinton-2_DBi	26
(TAAG)n	25.8
(ATCTAT)n	25.43
Copia1-LTR_DM	25.39
(AATTCTT)n	25
(ACTA)n	25
(ACTATAT)n	25
(AGTTAC)n	25
(ATCTTTGT)n	25
(GATGAAC)n	25
(TACTAT)n	25
(TAGATAAT)n	25
(TATACG)n	25
PARISa_DPe	25
BS4_DM	24.64
(CACTGT)n	24.5
BEL-8_DEl-LTR	24.25
(ACTTGT)n	24
(ATATGTT)n	24
(ATTACCT)n	24
(CTATAA)n	24
(GATAGA)n	24
(GTCTATA)n	24
(TACGATA)n	24
(TACTA)n	24
(TATATATAAA)n	24
(TCATAATG)n	24
(TGGTGCTGA)n	24
(TGTTAATA)n	24
(TTATACA)n	24
(ATCAATC)n	23.5
(AGATACT)n	23
(AGTAAC)n	23
(AGTATTT)n	23
(GAGACTT)n	23
(TCTAA)n	23
(TGTTATC)n	23
(TTAATG)n	23
Gypsy-2_DGri-I	22.57
(GAACAG)n	22.5
Jockey-4_DYa	22.5
(ATGGACG)n	22
(GATAT)n	22
(GCATATG)n	22
(GCTCCAT)n	22
(TATCGCT)n	22
(TTGTTGCC)n	22
Gypsy-8_DPer-LTR	22
Gypsy-4_DAn-LTR	21.88
Gypsy-5_DKi-LTR	21.57
(ATAATTA)n	21.5
(CACAATA)n	21.5
(GTACGAA)n	21.5
(TTAACA)n	21.33
(AAACT)n	21
(ATGTATT)n	21
(CCCTGAA)n	21
(TACCATCGA)n	21
(TACCTG)n	21
(TCGGAGA)n	21
(TCTGTTCA)n	21
(TGACTGAA)n	21
(TTGGCAC)n	21
I-1_DYa	21
(CAAGATA)n	20.5
(TAACAG)n	20.5
I-1_DBp	20.5
Gypsy20-LTR_Dya	20.46
Gypsy-10_DTa-I	20.12
(AATGATT)n	20
(ACTT)n	20
(CATACAC)n	20
(CCAACAAT)n	20
(CTGAGAAA)n	20
(CTTAAG)n	20
(GTAATTA)n	20
(TATATGGTA)n	20
(TGTTTATA)n	20
(TTCCGTA)n	20
hAT-5_DK	20
Copia-1_DSe-LTR	19.82
Gypsy-6_DSim-LTR	19.68
BEL-2_DBi-I	19.53
(ATATTAA)n	19.45
(TTAATTA)n	19.38
Jockey-4_DSim	19.38
Transib-6_DBp	19.25
(ACAGAAG)n	19
(ATGGAAT)n	19
(CATAATT)n	19
(GTCCAG)n	19
(TAAATG)n	19
(TTCATAA)n	19
Copia-5_DAn-I	19
TLD2	19
Gypsy15-LTR_Dya	18.85
Gypsy-2_DWil-I	18.8
Gypsy-11_DRh-I	18.75
Polinton-1_DBi	18.75
(AATTATC)n	18.67
(TCACCGA)n	18.5
BEL-13_DTa-I	18.5
Mariner-16_DRh	18.5
Gypsy-8_DFi-I	18.43
(CATATT)n	18.33
(TAATATT)n	18.08
(AATGCTGA)n	18
(AGATCTC)n	18
(ATACGGT)n	18
(ATATAGA)n	18
(CAACCAT)n	18
(CATATGG)n	18
(CCGAGA)n	18
(CTCCCTCG)n	18
(GATATC)n	18
(GGTCCAT)n	18
(GTGTTCA)n	18
(TACATAA)n	18
(TCATTTA)n	18
(TCGACA)n	18
(TGAATAG)n	18
(ATTATAT)n	17.92
Copia-2_DYa-LTR	17.85
(ATATG)n	17.83
(CTTA)n	17.8
(TAAGA)n	17.67
(ATAAC)n	17.62
(ATTAATA)n	17.6
(TATGAA)n	17.57
NTS_DM	17.54
(TATATCA)n	17.5
(TTTTAAG)n	17.5
Gypsy17-I_Dpse	17.5
Jockey-10_DY	17.5
(CAATT)n	17.42
(AAGATT)n	17.33
BEL-17_DTa-I	17.3
Gypsy-52_DWil-I	17.22
Copia-1-I_DY	17.08
(AAAGT)n	17
(AATACCT)n	17
(ACTATTCA)n	17
(AGATCTT)n	17
(CCGTTA)n	17
(CTCTGAT)n	17
(GTGTGTCA)n	17
(TAGATC)n	17
(TATTATC)n	17
(TGTATAT)n	17
(TTACCTT)n	17
BEL-12_DTa-I	17
(TTCATTA)n	16.77
(CATATAC)n	16.67
Gypsy10-I_Dya	16.67
(GGAATCC)n	16.5
(GTAATG)n	16.5
(AATAATT)n	16.33
(ACGAGT)n	16.33
DNA3-1_DTa	16.25
(ATAATGA)n	16.15
(AATATC)n	16
(AATCGT)n	16
(AATGGAA)n	16
(ATACAAA)n	16
(ATAGCGA)n	16
(ATTTCCG)n	16
(CGGTAA)n	16
(CTGTGA)n	16
(GAAGTCA)n	16
(GGAATTG)n	16
(GGAGTAT)n	16
(GGTAA)n	16
(GTTAGT)n	16
(TAAGTT)n	16
(TATATGA)n	16
(TATATGGT)n	16
(TCAATGT)n	16
(TCTTTCC)n	16
(TGAGAG)n	16
(TTACCA)n	16
(TTATTTG)n	16
(TTTCCTG)n	16
Gypsy-41_DAn-LTR	16
Gypsy-13_DFi-I	15.92
Transib-7_DRh	15.76
(AATATTC)n	15.75
(ATATC)n	15.73
Harbinger-1_DW	15.73
(ATCAAT)n	15.71
(TTTTATA)n	15.57
Copia-3_DAn-I	15.56
(CAGAATG)n	15.5
(GAACGGA)n	15.5
(GGTATAT)n	15.5
Jockey-4_DAn	15.5
MDG1_LTR	15.35
(GAGTATCT)n	15.33
BEL-8_DPe-I	15.33
(AACCTCC)n	15
(AACTT)n	15
(AACTTTG)n	15
(AAGCT)n	15
(ACTCTG)n	15
(AGACTAT)n	15
(ATAACAT)n	15
(ATACAC)n	15
(CAATATT)n	15
(CACACTAC)n	15
(CAGTTTA)n	15
(CTGAATG)n	15
(GAATTT)n	15
(GAGGAAT)n	15
(GCAGACT)n	15
(GCCATCT)n	15
(GCTGAC)n	15
(GTAGTTA)n	15
(GTCCGTAT)n	15
(TCGATTG)n	15
(TGTTATTAT)n	15
(TTTTACT)n	15
CR1-2_DPer	15
CR1-6_DT	15
Mariner-13_DF	15
dmel_rDNA_ETS	14.88
Invader6_LTR	14.77
(AAATAA)n	14.75
(ATAGCAT)n	14.75
(ATGATA)n	14.75
Transib-6_DRh	14.68
(ATCATA)n	14.67
BEL-2_DBi-LTR	14.67
Copia-1_DBi-I	14.53
(ATTCCAG)n	14.5
(CGACTAT)n	14.5
(TACAGG)n	14.5
(TATACT)n	14.5
(TTAACAT)n	14.5
(TTCAAG)n	14.5
(TTGATA)n	14.5
(TAAC)n	14.43
(TTTACA)n	14.43
(TTAGTT)n	14.37
Gypsy-53_DWil-I	14.37
BEL-1_DBp-I	14.33
Gypsy-6_DEl-LTR	14.33
Gypsy-6_DWil-I	14.33
(ATTAC)n	14.09
Gypsy-2_DPer-I	14.07
(AATTACT)n	14
(AATTGAC)n	14
(ACAGTC)n	14
(ACATT)n	14
(ATAATGC)n	14
(ATACAGT)n	14
(ATATAAT)n	14
(ATTCAGC)n	14
(CATGAT)n	14
(CTATTTA)n	14
(GATTCCT)n	14
(GCATTAT)n	14
(GTGTA)n	14
(TAACAGT)n	14
(TCGCTTA)n	14
(TTATGTT)n	14
(TTTGCTC)n	14
BEL-15_DP-I	14
Helitron-1_DPe	14
(TTTAC)n	13.85
BEL-3_DYa-LTR	13.8
Mariner-8_DF	13.77
dmel_rDNA_ITS1	13.74
(AATATAT)n	13.71
(ATCTA)n	13.67
(CAATACA)n	13.67
(TTAAGT)n	13.67
BURDOCK_LTR	13.67
Gypsy-23_DBp-I	13.67
1pt688.Contig101_locus	13.66
Gypsy-1_DAn-I	13.62
(TTATTTA)n	13.57
(ATACT)n	13.56
(TATTAA)n	13.54
(ATAAGTT)n	13.5
(ATTAATG)n	13.5
(TCCGTAA)n	13.5
(TCTGGTA)n	13.5
(TTAGAA)n	13.5
Gypsy-25_DP-LTR	13.5
(AATTTC)n	13.44
Jockey-3_DVi	13.37
(CAGATAC)n	13.33
(TAAGTA)n	13.25
(TAATAAT)n	13.2
Helitron-2N1_DVir	13.11
(AATTAGT)n	13
(ACTGGT)n	13
(AGGATAT)n	13
(ATATAGT)n	13
(ATGATGA)n	13
(CCCTAT)n	13
(GACTTA)n	13
(GGATACA)n	13
(GGATCAG)n	13
(GTGTCCA)n	13
(TAAAGTT)n	13
(TATGCGA)n	13
(TCAATA)n	13
(TCATAT)n	13
(TCCATTCTG)n	13
(TCTTGTA)n	13
(TGAAGT)n	13
(TGGTAAC)n	13
(TTAATAG)n	13
(TTAGAT)n	13
(TTGGTCCTT)n	13
HELENA_RT	12.96
dmel_rDNA_2s_rDNA	12.83
Gypsy-35_DEl-I	12.78
(TTATGATA)n	12.75
Jockey-1_DBp	12.75
NOF_FB	12.73
(AGATTTT)n	12.67
(ATGAAC)n	12.67
(TATATGG)n	12.67
Gypsy-25_DAn-I	12.67
Jockey-1_DAn	12.64
dmel_rDNA_ITS2	12.62
(AGTTTTA)n	12.5
(ATTTATG)n	12.5
(CCTATAG)n	12.5
(TTTAAG)n	12.5
Gypsy-19_DEl-I	12.5
Mariner-12_DAn	12.5
Transib5	12.49
(TAACTA)n	12.4
Copia_LTR	12.34
(ATAAGAA)n	12.33
(GTTATA)n	12.33
(TACTT)n	12.33
(ATAATG)n	12.25
(TATAGA)n	12.25
DNA2-1_DAn	12.25
Gypsy13-LTR_Dya	12.25
(GAAA)n	12.2
Copia-3_DBp-I	12.06
Gypsy-17_DTa-I	12.02
(AAGAACA)n	12
(AATAACC)n	12
(AATCAAG)n	12
(ACGCG)n	12
(ACTATA)n	12
(ATAAGTAA)n	12
(ATTTCAT)n	12
(CAGTA)n	12
(CCATTAC)n	12
(CCTGTG)n	12
(CGTACC)n	12
(CTGAAC)n	12
(CTTCTCA)n	12
(GAAGAAC)n	12
(GAATAG)n	12
(GACTCT)n	12
(GCACTT)n	12
(TATCAG)n	12
(TCAAGA)n	12
(TCATGGT)n	12
(TCCTTTC)n	12
(TTAGA)n	12
(TTAGTGA)n	12
(TTATTAG)n	12
(TTCTATA)n	12
Gypsy-29_DEl-I	12
Gypsy-7_DEl-LTR	12
Jockey-7_DAn	12
Polinton-2_DK	12
LOOPER1_DM	11.98
(AATTAT)n	11.96
Transib-1_DBi	11.96
hAT-1_DSi	11.94
(TTATAA)n	11.91
(ATGTAA)n	11.86
CR1-4_DRh	11.86
Gypsy-46_DWil-I	11.83
Invader6_I-int	11.83
Gypsy-23_DYa-I	11.82
hAT-2_DSe	11.8
hAT-4_DRh	11.8
Gypsy-12_DVir-I	11.79
(CTAAA)n	11.75
dsim_rDNA_28S_rDNA	11.75
DMRP1	11.74
Polinton-1_DY	11.73
Transib-6_DAn	11.73
(TAACTG)n	11.71
(TTTATAT)n	11.71
Gypsy-8_DPer-I	11.69
(AACCTAA)n	11.67
(AATCAT)n	11.67
(ATGACT)n	11.67
(ATTATTCGG)n	11.67
(CTTTTTA)n	11.67
Gypsy-55_DEl-I	11.67
Rsp_SAT	11.67
Transib-7_DBi	11.66
Gypsy-41_DAn-I	11.62
CR1-2_DF	11.6
(AATATTT)n	11.59
(ATTGT)n	11.57
(AAATGCC)n	11.5
(AACATAT)n	11.5
(ATACCCA)n	11.5
(ATATTAAT)n	11.5
(ATCTATA)n	11.5
(GGTCTCA)n	11.5
(GTTCAG)n	11.5
(TACAT)n	11.5
(TAGCATAA)n	11.5
(TGTTATT)n	11.5
Gypsy18-LTR_Dya	11.5
hAT-2_DRh	11.5
Gypsy-21_DWil-I	11.43
Gypsy2-I_DV	11.43
ROVER-LTR_DM	11.43
Helitron-N1_DEl	11.37
dsim_rDNA_5_8S_rDNA	11.35
(ATATGGT)n	11.33
(CATTGCA)n	11.33
(TAATCCG)n	11.33
hAT-1_DRh	11.33
(ATAGAT)n	11.31
Invader3_LTR	11.31
Gypsy-24_DAn-I	11.29
Helitron-N2_DBi	11.26
I-2_DBi	11.26
TRANSPAC_I-int	11.26
(AGATACTC)n	11.25
(TATAGTA)n	11.25
(TTCTTC)n	11.25
CR1-1_DRh	11.2
Gypsy-31_DYa-LTR	11.2
(ATAACA)n	11.15
TRANSIB2	11.15
Gypsy15-I_Dya	11.12
I-2_DEl	11.11
(TAATTA)n	11.09
Gypsy-7_DSe-I	11.05
(AAATGGT)n	11
(AATATTGC)n	11
(ACATTAA)n	11
(AGTTACG)n	11
(ATAACC)n	11
(ATACTAG)n	11
(ATGCAAT)n	11
(CAGAGT)n	11
(CCTATG)n	11
(CCTTTTAG)n	11
(CGAGG)n	11
(GGACCAT)n	11
(GTCAGTGA)n	11
(GTCCATTT)n	11
(GTCGAA)n	11
(GTCTGAATG)n	11
(GTTATC)n	11
(TACTGGA)n	11
(TATATTC)n	11
(TCAAGAT)n	11
(TCTCCCG)n	11
(TGAATTTA)n	11
(TGCCTGGATG)n	11
(TGGTCGC)n	11
(TGTACAGT)n	11
(TTAAGAA)n	11
(TTGACAA)n	11
Helitron-2_DF	11
I-6_DF	11
DOC6_DM	10.99
(ATATAA)n	10.93
(ATATCAT)n	10.92
Gypsy5-I_Dya	10.91
(TAATGA)n	10.83
Gypsy-15_DEl-I	10.83
(TTATAAT)n	10.8
(AGAGAT)n	10.75
(ATAAA)n	10.75
(ATTAATT)n	10.75
Transib-10_DAn	10.74
(TTAATTT)n	10.7
(AATCCCA)n	10.67
(AGGAAT)n	10.67
(CTATAACA)n	10.67
(GCATGTGTG)n	10.67
(GTAAGAA)n	10.67
(GTATTCA)n	10.67
(TATAGTTCAA)n	10.67
(TGATAA)n	10.67
BEL2-I_Dmoj	10.67
(AATGAAATG)n	10.65
Jockey-6_DYa	10.63
Copia-2_DYa-I	10.6
HETRP_DM	10.6
Helitron-N2_DBp	10.6
Gypsy-28_DBp-I	10.57
Gypsy-14_DBi-I	10.56
Copia-1_DSim-LTR	10.54
Gypsy-11_DFi-I	10.53
(AAGCACAA)n	10.5
(ACTCCCC)n	10.5
(AGTATG)n	10.5
(ATTTATA)n	10.5
(CAAATC)n	10.5
(CAGCAGT)n	10.5
(CAGTAAG)n	10.5
(CGGTCTT)n	10.5
(CTGTA)n	10.5
(GTGTTCT)n	10.5
(TACAGCA)n	10.5
(TATATAA)n	10.5
(TATATGTA)n	10.5
(TGACGTA)n	10.5
(TTACATT)n	10.5
hAT-1_DP	10.5
(AATTTA)n	10.47
(TCATA)n	10.43
Dtripu2cons	10.43
Gypsy-28_DAn-I	10.41
(CATTG)n	10.4
Gypsy-19_DWil-I	10.4
Gypsy-9_DMoj-LTR	10.4
TRANSPAC_LTR	10.4
(AATATTA)n	10.36
(ACTCT)n	10.33
(ATTTCAGT)n	10.33
(TAATG)n	10.33
BEL-11_DEl-I	10.33
Mariner-9_DRh	10.33
QUASIMODO_I-int	10.32
Gypsy11_LTR	10.3
Gypsy6-I_Dya	10.29
MINOS	10.29
Invader2_LTR	10.28
(ATGTTT)n	10.27
ROO_LTR	10.27
(TATATAC)n	10.25
(TTTTAAT)n	10.25
Gypsy-9_DTa-LTR	10.25
Gypsy16-I_Dpse	10.25
piggyBac-1_DEu	10.25
(ATGTAT)n	10.21
(ATAGG)n	10.2
QUASIMODO2-LTR_DM	10.18
hAT-2_DK	10.11
(TAATT)n	10.06
IDEFIX_I-int	10.06
Jockey-10_DBp	10.02
(AAATTAT)n	10
(AATTCGT)n	10
(ACAGTACAT)n	10
(ACATACAA)n	10
(ACTCGAGG)n	10
(AGATTT)n	10
(ATCCAGA)n	10
(ATGAGT)n	10
(ATTACAT)n	10
(ATTATATT)n	10
(ATTCACA)n	10
(ATTTACT)n	10
(CATATAGA)n	10
(CATCCAGG)n	10
(CATCTTGC)n	10
(CCCTGAT)n	10
(CGAACCAT)n	10
(CGATAC)n	10
(CGGATGGA)n	10
(CTATT)n	10
(GAAAAAT)n	10
(GAGGTCT)n	10
(GAGTA)n	10
(GATAGT)n	10
(GCGATCA)n	10
(GGATCTC)n	10
(GGTCTTC)n	10
(GTTACC)n	10
(GTTCAGA)n	10
(TAAACG)n	10
(TAACTTT)n	10
(TAATGGT)n	10
(TAGGAA)n	10
(TAGTCG)n	10
(TCAAG)n	10
(TCATC)n	10
(TCGTTCT)n	10
(TCTGGGTA)n	10
(TGAATGA)n	10
(TGTTGAT)n	10
(TTTAGATA)n	10
Mariner-4_DBp	9.96
(TATACA)n	9.95
CR1-9_DTa	9.95
(AGTAT)n	9.88
Gypsy-53_DEl-I	9.88
DIVER_LTR	9.87
(TCTTATA)n	9.8
Mariner-4_DY	9.8
MDG3_LTR	9.79
Gypsy-16_DBi-I	9.77
(ACACTTTTA)n	9.75
(GATGTT)n	9.75
Gypsy6-LTR_Dya	9.75
Gypsy-12_DSim-I	9.74
Hoyak3	9.74
Gypsy-8_DEl-I	9.73
Stalker2_LTR	9.72
Gypsy-15_DEl-LTR	9.71
(AGTATT)n	9.7
(AAAAATC)n	9.67
(AATCT)n	9.67
(ATACCT)n	9.67
(ATTTAGA)n	9.67
(CCGTATC)n	9.67
(TAGCTC)n	9.67
(TTAACT)n	9.67
(TTATCTA)n	9.67
Transib1_Dwil	9.67
STALKER4_LTR	9.65
Mariner-17_DK	9.62
(GTACTC)n	9.6
I-4_DBi	9.6
ROOA_LTR	9.59
(ATATGC)n	9.57
REP-2_DTa	9.57
Gypsy-2_DBi-I	9.56
Helitron-N1_DBi	9.55
Gypsy9-I_Dya	9.52
Transib-2_DRh	9.52
(AAGTTA)n	9.5
(ACGAAGGAC)n	9.5
(AGATT)n	9.5
(ATAGCTT)n	9.5
(ATATCCGA)n	9.5
(ATTGCAG)n	9.5
(CCATCTG)n	9.5
(CTGGTAT)n	9.5
(GATCGAA)n	9.5
(GGAATAT)n	9.5
(TGTAGA)n	9.5
(TTTGTTA)n	9.5
Gypsy-11_DTa-LTR	9.5
ROOA_I-int	9.47
BEL-15_DTa-I	9.43
DM176_LTR	9.42
(TATAAT)n	9.41
BEL-6_DBp-I	9.41
(TATCATA)n	9.4
(TTTAATA)n	9.4
Helitron1_DM	9.36
UVIR_DV	9.36
(ATACATT)n	9.33
(CAATTA)n	9.33
(GTTAATTGT)n	9.33
(TACTAGT)n	9.33
(TGTTTTA)n	9.33
Harbinger-1_DRh	9.33
Gypsy-8_DSim-I	9.32
Helitron-1_DF	9.29
Gypsy-4_DBi-I	9.28
Gypsy-6_DSe-LTR	9.26
(CGATTA)n	9.25
(ACCGATA)n	9.22
Mariner-4_DAn	9.22
(ACTTTT)n	9.2
(ATAACT)n	9.2
(CTGTTA)n	9.2
(GATATAA)n	9.2
(TTAA)n	9.2
(TCTATT)n	9.18
(ATTGC)n	9.14
(GGATAC)n	9.14
I-4_DF	9.08
Outcast-1_DEl	9.06
Mariner-5_DRh	9.02
CR1-1_DEl	9.01
(AAATCT)n	9
(AACCACT)n	9
(AAGTTAT)n	9
(AATATTG)n	9
(AATCGAA)n	9
(AATGC)n	9
(AATGCAA)n	9
(AATTATT)n	9
(ACACCCT)n	9
(ACCCCTA)n	9
(ACTTTAT)n	9
(AGATATT)n	9
(AGTAGCG)n	9
(AGTCAG)n	9
(ATAAG)n	9
(ATGAAA)n	9
(ATTATGA)n	9
(ATTCTAT)n	9
(CAATTCT)n	9
(CATTAT)n	9
(CTCAGATG)n	9
(CTTACT)n	9
(CTTTTCG)n	9
(GACATT)n	9
(GACGAAGTG)n	9
(GGATGTTG)n	9
(GGGAAACT)n	9
(GTACTG)n	9
(GTTACTG)n	9
(GTTCTTT)n	9
(TACAAA)n	9
(TATAATAA)n	9
(TATCAAT)n	9
(TATCGTA)n	9
(TCAGCTT)n	9
(TCTACTA)n	9
(TCTCAC)n	9
(TGCTAC)n	9
(TGGATAA)n	9
(TGTTAC)n	9
(TTACCTA)n	9
(TTACTG)n	9
(TTTCTTA)n	9
EnSpm-1_DF	9
Gypsy-11_DEl-I	9
Gypsy-1_DWil-I	9
Gypsy-27_DWil-I	9
Mariner-13_DBp	9
Gypsy-4_DSim-LTR	8.99
(AATAGAC)n	8.97
POGON1	8.95
(ATATTTA)n	8.93
Gypsy16-I_Dya	8.92
Transib1_DP	8.89
(ACAATG)n	8.88
(AAACAT)n	8.8
(ATTTTAA)n	8.8
Gypsy-10_DMoj-LTR	8.8
(AATATT)n	8.79
DNA8-1_DEl	8.79
ROO_I-int	8.78
Gypsy-6_DRh-I	8.76
(ATAATTC)n	8.75
(TCTTCTG)n	8.75
Copia-1_DSe-I	8.75
Gypsy20-I_Dya	8.73
(ATGTTG)n	8.71
(CATATTT)n	8.7
(AATTGT)n	8.69
(ATCAT)n	8.69
Gypsy-4_DBi-LTR	8.68
(AACTAT)n	8.67
(AATACG)n	8.67
(TAAGT)n	8.67
(TCTGTG)n	8.67
BEL-11_DWil-I	8.67
(AATTAA)n	8.64
(ATAATAT)n	8.64
(GTAA)n	8.64
(ATATCT)n	8.62
(CAATCT)n	8.62
Copia-1_DFi-I	8.62
(TTACTA)n	8.6
(CATTCT)n	8.57
(ATATATT)n	8.56
(CTATTT)n	8.56
I-2_DBp	8.56
(AAAAGGC)n	8.5
(AATAGA)n	8.5
(AATGAAT)n	8.5
(ACTGACGG)n	8.5
(AGTCT)n	8.5
(CAATTAC)n	8.5
(CATAA)n	8.5
(CTGTCC)n	8.5
(GATTAG)n	8.5
(GATTCGG)n	8.5
(GGCATAT)n	8.5
(GTAACTA)n	8.5
(GTCAGTT)n	8.5
(GTGTCTGT)n	8.5
(GTTTAT)n	8.5
(TAATCAT)n	8.5
(TCATCAA)n	8.5
(TTGGTAGT)n	8.5
Gypsy-15_DBi-I	8.5
Polinton-2_DEu	8.5
hAT-4_DBp	8.5
piggyBac-1_DW	8.5
(ATTTAC)n	8.47
Transib-3_DF	8.45
(CTTGCAA)n	8.44
(TAATA)n	8.44
Copia_I-int	8.44
Gypsy-40_DAn-I	8.44
(TATATATG)n	8.43
Gypsy-9_DFi-I	8.43
Gypsy-44_DWil-I	8.42
Mariner-12_DRh	8.42
(CTAATT)n	8.41
(CTCTTTG)n	8.4
(TTTAACA)n	8.4
(ATTTAT)n	8.37
1pt688.2L_2_260bp_locus	8.35
(ATAAAT)n	8.33
(ATCGTG)n	8.33
(ATTGTAG)n	8.33
(CATTGG)n	8.33
(TTTACTGT)n	8.33
Copia-4_DMoj-I	8.33
Jockey-8_DEu	8.33
ZAM_I-int	8.33
(TTTATA)n	8.32
(ATTAACA)n	8.29
Transib4_DP	8.28
Transib-4_DBp	8.27
Gypsy-1_DBi-I	8.26
(TGCCATA)n	8.25
BEL-7_DWil-I	8.25
Gypsy-1_DG-LTR	8.25
Gypsy-27_DYa-LTR	8.25
Gypsy-4_DEl-I	8.25
BEL_LTR	8.22
Gypsy-31_DYa-I	8.22
Gypsy-3_DKi-I	8.22
(AATGTTT)n	8.2
(GTTATTT)n	8.2
(TAACT)n	8.2
Gypsy-1_DSim-I	8.2
Transib-1_DRh	8.2
(ATATGA)n	8.18
(ATCTAA)n	8.17
(CATATA)n	8.16
Gypsy-30_DWil-I	8.12
Gypsy-25_DYa-I	8.09
(TTAC)n	8.08
(ATAG)n	8.06
Gypsy-4_DRh-I	8.06
Helitron-N1_DBp	8.04
DM1731_LTR	8.01
(AAAACAA)n	8
(AACTACA)n	8
(AAGAAT)n	8
(AATCGAG)n	8
(AATCTA)n	8
(ACAAGCA)n	8
(ACACTA)n	8
(AGATGGC)n	8
(AGGATCC)n	8
(ATAAACT)n	8
(ATCTATAT)n	8
(ATGTACAT)n	8
(ATGTCGGAAT)n	8
(ATTTTGA)n	8
(CACAGTA)n	8
(CAGCATCAT)n	8
(CAGTAT)n	8
(CGAATGTT)n	8
(CGACTAC)n	8
(CTCGCAA)n	8
(GAGCGGA)n	8
(GATACATA)n	8
(GGAGAAA)n	8
(GGTATAC)n	8
(GTGCAAT)n	8
(GTGTTAT)n	8
(TACTTAA)n	8
(TATTACA)n	8
(TCTTAGT)n	8
(TGTAG)n	8
(TTAAATAT)n	8
(TTAATA)n	8
(TTAGT)n	8
(TTCCTAT)n	8
(TTGGGTG)n	8
Copia-4_DWil-I	8
Harbinger-N1_DPe	8
MAR_DW	8
Mariner-6_DBp	8
dmau_rDNA_ETS	8
Mariner-2_DT	7.98
Jockey-3_DF	7.9
(AATACCG)n	7.88
I-3_DEu	7.88
MuDR-1_DT	7.85
TRANSIB1	7.85
(ATTATTT)n	7.84
(ATCTTGT)n	7.8
(ATTATGC)n	7.8
(TTACTT)n	7.8
Mariner-7_DYa	7.78
(ATCTGTT)n	7.75
(TATCTA)n	7.75
(TGTCCTGCGA)n	7.75
(ATACATACAT)n	7.71
(TATATTT)n	7.71
(CCATCTA)n	7.7
Gypsy-5_DSe-I	7.7
(TGTAAT)n	7.69
Helitron-2_DRh	7.69
Gypsy-57_DEl-I	7.68
(CAATAAT)n	7.67
(CTGAACA)n	7.67
(CTGCTAT)n	7.67
(CTTTACTA)n	7.67
(GAATGA)n	7.67
(TAGTC)n	7.67
(TATAAG)n	7.67
(TTAGCA)n	7.67
(TTGCCTT)n	7.67
Gypsy9-I_Dpse	7.67
(TAT)n	7.64
TC1-2_DM	7.63
(GAAGAT)n	7.62
(TTACAA)n	7.62
Helitron-N2_DEl	7.62
(GAATAT)n	7.6
(TACATAC)n	7.6
(TATACAA)n	7.6
(TATGT)n	7.6
Homo8	7.6
Gypsy14-I_Dpse	7.58
TABOR_I-int	7.58
(AATT)n	7.57
(CATCTT)n	7.57
Gypsy12-I_Dya	7.56
(ATATA)n	7.54
(TTATAT)n	7.54
I-3_DK	7.53
TRANSIB3	7.52
DM297_LTR	7.51
(AATAGAATGG)n	7.5
(AATGTGA)n	7.5
(AATGTTA)n	7.5
(ACAATTATT)n	7.5
(AGCGATCA)n	7.5
(ATAGTAATA)n	7.5
(ATTATG)n	7.5
(ATTTAAC)n	7.5
(CACATTT)n	7.5
(CACTCCG)n	7.5
(CTATAG)n	7.5
(CTGAATGA)n	7.5
(CTTTTAT)n	7.5
(GTTCTCCA)n	7.5
(TAAGAA)n	7.5
(TACAGC)n	7.5
(TCAAA)n	7.5
(TCTAG)n	7.5
(TCTTTCTA)n	7.5
(TTGTTGG)n	7.5
(TTTCCAC)n	7.5
(TTTCCCCA)n	7.5
BEL-1_DEre-I	7.5
Gypsy-20_DAn-I	7.5
hAT-5N1_DK	7.5
(TATATT)n	7.49
Bica_LTR	7.49
Mariner-20_DAn	7.49
Gypsy-33_DAn-I	7.48
(ATAA)n	7.47
(ATAATTT)n	7.47
(GATTTC)n	7.47
Gypsy-2_DEl-I	7.47
(TAAT)n	7.46
Pifo_I-int	7.44
Gypsy-36_DEl-I	7.41
Mariner-1_DF	7.41
(ATATATG)n	7.4
(TTACCT)n	7.4
Gypsy-4_DSe-I	7.4
S_DM	7.36
(TTAG)n	7.35
FROGGER_LTR	7.34
Gypsy-38_DAn-I	7.34
(AATCCTC)n	7.33
(AGATAAT)n	7.33
(ATGAACA)n	7.33
(ATTCAATTCG)n	7.33
(TATTTGA)n	7.33
(TCGTC)n	7.33
(TTCTTGT)n	7.33
(TTTGCAT)n	7.33
(TTATATT)n	7.32
DM297_I-int	7.32
(AATAATA)n	7.29
(GATCTCC)n	7.29
(TTAATT)n	7.29
(GTATA)n	7.27
G4_DM	7.27
(TCTGAA)n	7.26
BEL-9_DWil-I	7.26
IDEFIX_LTR	7.26
(ACTGGTA)n	7.25
Gypsy-47_DEl-I	7.25
Mariner-6_DBi	7.25
Mariner-8_DBp	7.25
Gypsy-10_DMoj-I	7.23
Gypsy8-I_Dya	7.21
dmel_rDNA_18S_rDNA	7.2
Gypsy-3_DGri-I	7.19
(CATAT)n	7.18
(TACTTTA)n	7.12
BURDOCK_I-int	7.1
(AATTTT)n	7.09
(ATATTA)n	7.07
Gypsy-4_DSim-I	7.05
(GAATT)n	7.04
(AAAACT)n	7
(AACAATT)n	7
(AACACAA)n	7
(AACTAGA)n	7
(AATATCA)n	7
(AATGATC)n	7
(AATTATG)n	7
(AATTTGT)n	7
(ACACCACC)n	7
(ACTTA)n	7
(ACTTCT)n	7
(AGATGA)n	7
(AGCATTT)n	7
(AGCTAT)n	7
(ATAACG)n	7
(ATATACT)n	7
(ATCACT)n	7
(ATCAG)n	7
(ATTAAC)n	7
(ATTAACG)n	7
(ATTACCA)n	7
(ATTGTAA)n	7
(ATTTGCA)n	7
(CAGGAGCAG)n	7
(CATCGGA)n	7
(CATTAC)n	7
(CCACTTT)n	7
(CCTAAT)n	7
(CGTTGTT)n	7
(CTAGCAA)n	7
(CTTACAA)n	7
(CTTATAT)n	7
(GACAGGT)n	7
(GATCAT)n	7
(GATCGAC)n	7
(GTGTGGAT)n	7
(TAAGTAA)n	7
(TACTATA)n	7
(TAGCAA)n	7
(TATGGATA)n	7
(TATGTC)n	7
(TATTTTAT)n	7
(TCCCATA)n	7
(TCTCG)n	7
(TGAATACA)n	7
(TGAGAC)n	7
(TGAGTA)n	7
(TTCTCAA)n	7
(TTTAAGA)n	7
BEL-7_DTa-I	7
Gypsy-7_DVir-LTR	7
Harbinger-1N1_DRh	7
Loa-2_DEl	7
Mariner-11_DF	7
Transib-11_DAn	7
hAT-6_DBp	7
piRNA_cluster_42AB	6.98
(TATTTA)n	6.96
Invader5_LTR	6.95
ROVER-I_DM	6.95
(AAGTT)n	6.94
Gypsy-37_DWil-I	6.93
P-1_DY	6.91
TRANSIB4	6.91
(ATATAT)n	6.9
(TTCGCAT)n	6.9
hAT-2_DY	6.9
BARI1	6.89
CR1-1_DWil	6.89
(AGATAA)n	6.88
I-4_DK	6.87
(TTATATG)n	6.86
QUASIMODO2-I_DM	6.86
(GATA)n	6.85
BEL-4_DBi-I	6.84
(CATAAT)n	6.83
Helitron-1_DEu	6.83
Howilli2	6.83
(CAGTTA)n	6.82
(ATTA)n	6.8
hAT-8_DBp	6.8
(TAATTT)n	6.79
(AAGGAC)n	6.77
(ATGAA)n	6.76
Gypsy7_I-int	6.76
(AACAGTA)n	6.75
(ACATTA)n	6.75
(ATGGTT)n	6.75
(TATGAT)n	6.75
(TCACTA)n	6.75
(TGACTAAC)n	6.75
(TTAAGA)n	6.75
(TTGTTTTT)n	6.75
(TTTTGTATG)n	6.75
Gypsy-17_DBp-I	6.75
(ATACA)n	6.74
Gypsy-7_DSe-LTR	6.73
Copia2_LTR_DM	6.72
Gypsy11-LTR_Dya	6.72
(CAGAAACTC)n	6.7
Gypsy-22_DWil-LTR	6.7
TIRANT_I-int	6.69
(ATATTTT)n	6.67
(ATGTGGAACT)n	6.67
(CAATAAA)n	6.67
(GAGATCG)n	6.67
(TCATATA)n	6.67
(TGTAAA)n	6.67
(TTTCTGA)n	6.67
Gypsy-10_DBp-I	6.67
Gypsy-12_DEu-I	6.67
I-2_DYa	6.67
hAT-N1B_DBp	6.67
BEL-3_DEl-I	6.66
BARI_DM	6.65
MARINA	6.64
(ATAT)n	6.63
(TATTAAT)n	6.62
(TTAAT)n	6.62
Gypsy-18_DBp-I	6.62
(TAC)n	6.61
Mariner-3_DK	6.6
Copia-6_DWil-I	6.59
Helena_Ds	6.59
(TCTATA)n	6.57
(TTATTG)n	6.57
Gypsy-34_DEl-I	6.57
Gypsy-28_DYa-I	6.56
I-6_DY	6.56
Jockey-14_DBp	6.56
(ATATTAT)n	6.55
(TAATATG)n	6.55
(TTTGTCA)n	6.55
(AACGGAT)n	6.5
(AAGATAT)n	6.5
(AAGCGAC)n	6.5
(AAGTAGT)n	6.5
(ACCTAGT)n	6.5
(ATACTT)n	6.5
(ATTTCGA)n	6.5
(CACCTTT)n	6.5
(CGGCTAC)n	6.5
(CTAAT)n	6.5
(CTATATG)n	6.5
(CTATGG)n	6.5
(CTCCGCT)n	6.5
(GAGAC)n	6.5
(GCGTGGA)n	6.5
(GGAACTA)n	6.5
(GTTTAA)n	6.5
(TAATCTT)n	6.5
(TAGATTA)n	6.5
(TGTTTAG)n	6.5
(TGTTTCT)n	6.5
(TTACGA)n	6.5
(TTAGCAA)n	6.5
(TTAGTCAAT)n	6.5
(TTATACT)n	6.5
(TTGTCCA)n	6.5
Gypsy-33_DWil-I	6.5
Gypsy-7_DTa-I	6.5
(ATTTAA)n	6.49
Gypsy-6_DSim-I	6.46
Outcast-2_DAn	6.46
Gypsy-6_DBi-I	6.44
(ACAATT)n	6.43
Gypsy1-I_Dya	6.42
(TGTTAA)n	6.4
ACCORD_I-int	6.4
Gypsy-29_DYa-LTR	6.4
(ATAGT)n	6.39
I-7_DBi	6.39
(AAGGACG)n	6.38
(TTTTAC)n	6.38
(AATTAAT)n	6.37
(AAGTTT)n	6.33
(AGCAACC)n	6.33
(ATTAACT)n	6.33
(ATTTGTA)n	6.33
(CAATTTA)n	6.33
(CGGCTCC)n	6.33
(CTGAGCC)n	6.33
(CTTTATA)n	6.33
(GGTATCT)n	6.33
(GTCTAGA)n	6.33
(TATATACA)n	6.33
(TTGTAA)n	6.33
(TTTTAAC)n	6.33
Gypsy-21_DY-I	6.33
Gypsy-28_DYa-LTR	6.33
(AGACT)n	6.29
(ATTGTA)n	6.29
(CTAT)n	6.29
(GAGTAT)n	6.29
(TATATAG)n	6.29
(ATT)n	6.28
(AACAACT)n	6.25
(AATATATGG)n	6.25
(AATTGTT)n	6.25
(ATCGGAA)n	6.25
(ATTAA)n	6.25
(TGGCTATA)n	6.25
BEL-14_DAn-LTR	6.25
Gypsy5_I-int	6.24
(TGTTA)n	6.22
(AGACTCA)n	6.2
(TATTC)n	6.2
DM176_I-int	6.19
(TATATG)n	6.18
BEL-1_DBi-I	6.18
DM412B_LTR	6.18
(ATCTC)n	6.15
(TAA)n	6.12
BEL-6_DRh-I	6.12
Helitron-1_DYak	6.12
Jockey-2_DVi	6.12
P_DG	6.12
BEL-15_DEl-I	6.11
Gypsy-13_DBi-I	6.11
Transib-1_DK	6.11
(ATTTAAG)n	6.09
(TATTTAC)n	6.08
(TTATTAT)n	6.08
Jockey-6_DVi	6.08
(ATTAAT)n	6.07
(TATTTTT)n	6.06
(TTTATAA)n	6.05
Gypsy-1_DSim-LTR	6.03
Gypsy5-I_Dpse	6.03
(AAAATGC)n	6
(AAGCAT)n	6
(AATCACA)n	6
(AATTG)n	6
(ACAATAA)n	6
(ACGAG)n	6
(ACTTAT)n	6
(ACTTCG)n	6
(ACTTGGAC)n	6
(AGAAAAC)n	6
(AGCTCCTT)n	6
(AGGGA)n	6
(AGGGT)n	6
(AGTTGAA)n	6
(ATAAGCG)n	6
(ATACGA)n	6
(ATGAT)n	6
(ATGTAAC)n	6
(ATTGAT)n	6
(CAAACTAC)n	6
(CAGATACA)n	6
(CAGTCTA)n	6
(CATTCCTGC)n	6
(CCAGGCT)n	6
(CCCATCTA)n	6
(CCTATTC)n	6
(CCTTACT)n	6
(CGGTTAA)n	6
(CTACAC)n	6
(CTCCCCA)n	6
(CTCGTT)n	6
(CTTCTCG)n	6
(CTTCTTT)n	6
(GAAACCGA)n	6
(GAATAGC)n	6
(GAATTC)n	6
(GACACTG)n	6
(GAGAAGC)n	6
(GATAATC)n	6
(GATTGGT)n	6
(GATTTAT)n	6
(GGGAA)n	6
(GTAAG)n	6
(GTAAGTG)n	6
(GTATAAT)n	6
(GTATACT)n	6
(GTTCTGT)n	6
(TAACAC)n	6
(TAATC)n	6
(TATCGA)n	6
(TATTCA)n	6
(TCCAGCTC)n	6
(TCGAATCAC)n	6
(TCTCATT)n	6
(TCTTGTT)n	6
(TGAGAT)n	6
(TGTAT)n	6
(TTAAAAA)n	6
(TTACATC)n	6
(TTACT)n	6
(TTCCTTG)n	6
BEL-5_DPer-I	6
Gypsy-37_DAn-LTR	6
Gypsy-3_DSim-I	6
Gypsy-60_DWil-I	6
Helitron-2_DBp	6
I-1_DWi	6
Jockey-7_DEu	6
Jockey-9_DBp	6
Transib-2_DBi	6
hAT-1_DAn	6
FW2_DM	5.99
Gypsy-13_DEu-I	5.99
Gypsy-13_DRh-I	5.99
Gypsy-8_DSe-I	5.96
(ATTCAT)n	5.95
Gypsy-2_DTa-I	5.93
S2_DM	5.91
(CAGCAAG)n	5.9
(TATA)n	5.9
DNA3-1_DF	5.89
(GGCAT)n	5.86
I-1_DEu	5.86
Gypsy-12_DFi-I	5.85
Gypsy-13_DEl-I	5.85
BEL-14_DTa-I	5.84
(AAGAGCA)n	5.83
(ACATAG)n	5.83
(ACCACGA)n	5.83
(AGTTCTA)n	5.83
(ATAAGT)n	5.83
(TCCAATT)n	5.83
(TGATTA)n	5.83
(ATATATA)n	5.82
Gypsy-13_DVir-I	5.81
(CATCTAC)n	5.8
(GAATATA)n	5.8
(TATCA)n	5.79
Jockey-3_DT	5.79
(TCTGA)n	5.78
I-4_DAn	5.78
Invader4_LTR	5.78
BS	5.77
(TATAATT)n	5.76
(AGATTA)n	5.75
(AGTTACCA)n	5.75
(ATCTAGT)n	5.75
(GATAAG)n	5.75
(TCTCCTG)n	5.75
1pt688.Contig9_locus	5.75
Gypsy-7_DWil-LTR	5.75
(ATTATA)n	5.73
(ATATGT)n	5.71
(TTATCG)n	5.71
(ACTAT)n	5.7
(TAAGGA)n	5.7
(AATAC)n	5.68
Gypsy18-I_Dya	5.68
(AAAATACG)n	5.67
(AACGGAG)n	5.67
(ACAAGAT)n	5.67
(AGAAGGC)n	5.67
(CACACCG)n	5.67
(CATTAAT)n	5.67
(CCGTGTC)n	5.67
(CCTTATC)n	5.67
(CGGCTCCT)n	5.67
(CGGGTCA)n	5.67
(CTGAAGA)n	5.67
(GATGTCT)n	5.67
(GATTATT)n	5.67
(GTAACC)n	5.67
(GTATATA)n	5.67
(TTTGATAT)n	5.67
TOM_I-int	5.67
Gypsy-50_DWil-LTR	5.66
Gypsy-27_DYa-I	5.65
Jockey-1_DEr	5.64
(ATACTGA)n	5.62
(ATCT)n	5.62
(AACATTT)n	5.6
(ATGGCAAA)n	5.6
(CTCCTAG)n	5.6
(GATTCTC)n	5.6
(GTTTGAA)n	5.6
(TAATGG)n	5.6
(TATTGC)n	5.6
(TGTCCAGT)n	5.6
DMTOM1_LTR	5.6
Gypsy-8_DTa-I	5.6
I-3_DAn	5.6
(TTAT)n	5.58
(AGAT)n	5.57
(TGATATA)n	5.57
(AACATT)n	5.56
(AATGAGA)n	5.56
(AATTTTT)n	5.56
(TAATAA)n	5.56
Mariner-15_DK	5.56
(AACTA)n	5.55
(TTTCATT)n	5.55
(GATAAT)n	5.52
(TTA)n	5.52
Homo1	5.52
(AATACTT)n	5.5
(AATATG)n	5.5
(AATTTAA)n	5.5
(ACTCAAA)n	5.5
(ACTTTTA)n	5.5
(AGCGC)n	5.5
(AGGATAAC)n	5.5
(ATAGATATC)n	5.5
(ATATACA)n	5.5
(ATATACC)n	5.5
(ATATAGCAG)n	5.5
(ATATGTACA)n	5.5
(ATCCTGG)n	5.5
(ATGAAT)n	5.5
(ATGC)n	5.5
(ATGCTC)n	5.5
(ATGGTAA)n	5.5
(ATTCCAA)n	5.5
(ATTCTA)n	5.5
(CAGTCGG)n	5.5
(CCATGTG)n	5.5
(CCGGATCA)n	5.5
(GATATAAA)n	5.5
(GATCCAA)n	5.5
(GGATGGATGG)n	5.5
(GGGTATG)n	5.5
(GTATTA)n	5.5
(TATGGT)n	5.5
(TATTGTT)n	5.5
(TCACCG)n	5.5
(TCCGTG)n	5.5
(TGCAGTTGC)n	5.5
(TGTATAGTA)n	5.5
(TTAGGT)n	5.5
(TAGTT)n	5.48
hAT-N1_DK	5.48
(TGTTTTC)n	5.47
(TTCGTTT)n	5.46
(TTTGAA)n	5.46
STALKER4_I-int	5.46
(ATATTGT)n	5.45
Gypsy-6_DTa-I	5.45
Mariner-14_DK	5.45
(TGGTATT)n	5.44
BEL-2_DSe-LTR	5.44
(AATCTC)n	5.43
(TTTAATT)n	5.42
Gypsy-3_DSe-I	5.42
Gypsy12-I_Dpse	5.42
Gypsy-5_DWil-LTR	5.41
(AAATGGG)n	5.4
(CATAC)n	5.4
(ATTATTA)n	5.38
(CTTCCT)n	5.38
(AATTA)n	5.36
(CAACTA)n	5.36
(TCTTTG)n	5.36
Gypsy-16_DRh-I	5.36
Gypsy-20_DBp-I	5.36
Gypsy19-I_Dya	5.36
(TGGAAC)n	5.35
(AATAAT)n	5.33
(AATACT)n	5.33
(AATCAAT)n	5.33
(AATCTGA)n	5.33
(ATTACA)n	5.33
(ATTAGAT)n	5.33
(ATTTCCC)n	5.33
(CTCAATT)n	5.33
(CTTGTCTC)n	5.33
(CTTTGCCA)n	5.33
(GAATACG)n	5.33
(GCTATCT)n	5.33
(GCTGTAT)n	5.33
(GGATAGTT)n	5.33
(GGGATA)n	5.33
(GTATAG)n	5.33
(TACGGGT)n	5.33
(TCCAACTA)n	5.33
(TTCCAGT)n	5.33
(TTAAC)n	5.32
Chouto_I-int	5.32
(ATATGCT)n	5.31
BEL1-I_Dya	5.3
(ATATGAA)n	5.29
(TATTAT)n	5.29
(TGGTAA)n	5.29
Gypsy13-I_Dpse	5.29
Hoyak2	5.28
(TATATA)n	5.26
Gypsy12_I-int	5.26
Jockey-4_DEl	5.26
(AGTTGCT)n	5.25
(ATTCCAC)n	5.25
(CAATGATC)n	5.25
(CACAACA)n	5.25
(CATCAGT)n	5.25
(GGAGATC)n	5.25
(GGATTAT)n	5.25
(TACTTG)n	5.25
(TTACAT)n	5.25
(TTGTTAGT)n	5.25
Jockey-4_DF	5.25
Copia-1_DWil-I	5.24
DNA4-1_DK	5.24
(ATTCTTT)n	5.22
(TGCTATA)n	5.22
Invader5_I-int	5.22
Helitron-5_DRh	5.21
(ATGAGG)n	5.2
(GTATTAA)n	5.2
(TAAA)n	5.2
(TAGATAC)n	5.2
(TCGACT)n	5.2
(TGCTTA)n	5.2
CR1-2_DT	5.2
R1-9_DWi	5.2
(TGTATA)n	5.19
BEL-5_DAn-I	5.19
I-3_DBi	5.19
(CGAGTA)n	5.18
Stalker3_LTR	5.18
(ACAAAT)n	5.17
(CAGTTTG)n	5.17
(GCTGACT)n	5.17
Gypsy-2_DAn-I	5.17
Gypsy-42_DWil-I	5.17
Transib2_DP	5.17
Jockey-6_DEu	5.15
NINJA_LTR	5.15
(CTGCTAA)n	5.14
(TAGCATA)n	5.14
(TATGA)n	5.14
(TTTAAC)n	5.14
(TTTATC)n	5.14
Jockey-2_DRh	5.14
(ATATAC)n	5.12
(GACAGT)n	5.12
Helitron-2_DVir	5.11
Gypsy-3_DRh-LTR	5.1
(ATCGAG)n	5.08
(TTTATTA)n	5.08
(AACCTC)n	5.07
Gypsy13-I_Dya	5.07
MICROPIA_I-int	5.07
(TTTTTAT)n	5.04
DOC5_DM	5.02
(AATATCT)n	5
(AATTTAG)n	5
(ACACAGAT)n	5
(ACAGT)n	5
(ACATTTT)n	5
(ACCTCCC)n	5
(ACTAAA)n	5
(ACTAGCC)n	5
(AGATCGG)n	5
(AGCTTT)n	5
(AGTTTGT)n	5
(ATACCCT)n	5
(ATATCG)n	5
(ATATGGG)n	5
(ATCATAT)n	5
(ATGGAGG)n	5
(ATGGTAG)n	5
(ATGTAAT)n	5
(ATTCAGG)n	5
(ATTTGA)n	5
(CCATCATCA)n	5
(CCTAT)n	5
(CCTATT)n	5
(CCTCGGA)n	5
(CTGTCA)n	5
(CTTAGACT)n	5
(CTTATC)n	5
(CTTGAT)n	5
(GAACAGC)n	5
(GAGCTTG)n	5
(GATAAA)n	5
(GATATTT)n	5
(GATCA)n	5
(GCAGTCT)n	5
(GGCAAAAT)n	5
(GGCAAAT)n	5
(GGTCAA)n	5
(GTCCGGT)n	5
(GTCTGTCC)n	5
(GTTTTATC)n	5
(TAAGGT)n	5
(TAATCAAT)n	5
(TAATCTA)n	5
(TAATGTTAA)n	5
(TAATTTC)n	5
(TATGTTT)n	5
(TATTTAG)n	5
(TCGGTGT)n	5
(TCTAC)n	5
(TGAATGTT)n	5
(TGAGAAC)n	5
(TGAGATA)n	5
(TGCTAAA)n	5
(TTAATTG)n	5
(TTATTGT)n	5
BEL-10_DEl-I	5
BEL-3_DBi-I	5
Bica_I-int	5
CR1-5_DRh	5
I-2_DVi	5
Jockey-2_DK	5
DM412	4.99
(TATTG)n	4.97
(ATA)n	4.96
BEL-6_DMoj-I	4.96
Invader2_I-int	4.96
(TATAG)n	4.95
(TTAAG)n	4.95
Jockey-7_DYa	4.95
Copia-1_DGri-I	4.93
I-4_DEu	4.92
(ATTT)n	4.91
I-2_DEu	4.91
(CCTCATG)n	4.9
(ATCTCGA)n	4.89
(ATTAGT)n	4.89
(GTAC)n	4.89
(TATGTTA)n	4.89
Helitron-1_DAna	4.89
(AATGAT)n	4.88
(AATTAG)n	4.88
(AGTATC)n	4.88
(TATACTA)n	4.88
(ATACAT)n	4.87
(AATCAC)n	4.86
(CGGAAA)n	4.86
(TATCTC)n	4.86
(TGGATAG)n	4.86
(AATA)n	4.84
(AATGT)n	4.84
Gypsy-12_DSim-LTR	4.84
(AT)n	4.83
(CTATATGG)n	4.83
(CTCTTG)n	4.83
(TTTCACT)n	4.83
Gypsy7-I_Dya	4.83
Hoana6	4.83
Gypsy11-I_Dya	4.82
(TATGTA)n	4.81
PROTOP	4.81
(ACATA)n	4.8
(AGACGT)n	4.8
(CATTA)n	4.8
(TATAGT)n	4.8
(TATTATA)n	4.8
(TCCAAGTA)n	4.8
(TCGCTCTC)n	4.8
(TTAGTA)n	4.8
hAT-5_DBp	4.8
piggyBac-2_DF	4.8
(AGATAT)n	4.77
FROGGER_I-int	4.77
Gypsy-10_DEu-I	4.77
MuDR-1_DEl	4.77
(GGATCT)n	4.76
(AGGAGCAGA)n	4.75
(ATGGAGGC)n	4.75
(CTGAAAA)n	4.75
(GATATG)n	4.75
(GGAATTC)n	4.75
(TATGCA)n	4.75
(TCATTC)n	4.75
(TTCTGGTC)n	4.75
Jockey-5_DYa	4.74
Gypsy-23_DY-I	4.73
Jockey-7_DRh	4.72
(AGAATA)n	4.71
(ATAC)n	4.71
(GAAATG)n	4.71
Copia-1_DVir-I	4.71
Gypsy-29_DYa-I	4.71
Gypsy-8_DVir-I	4.71
Gypsy9_I-int	4.71
(AGAACG)n	4.69
(AAGGAT)n	4.68
(GTCTATCTG)n	4.68
(TA)n	4.68
Helitron-N2_DT	4.68
(ATAACGT)n	4.67
(ATACTC)n	4.67
(CCATATCATA)n	4.67
(CCCGATC)n	4.67
(CCCTTGT)n	4.67
(CGACACC)n	4.67
(CTCTGAA)n	4.67
(CTGGATA)n	4.67
(GCATA)n	4.67
(TAACGAT)n	4.67
(TCAGGAT)n	4.67
(TGACCAG)n	4.67
(TGAGG)n	4.67
(TGGACCA)n	4.67
(TGTTTAA)n	4.67
(TTCTCTAA)n	4.67
(TTCTGTG)n	4.67
(TTTCATG)n	4.67
Copia-1_DSim-I	4.67
piggyBac-3_DAn	4.67
(TTTTAA)n	4.65
HeT-A3_DVi	4.65
(ATCGAA)n	4.64
(GAACTGG)n	4.64
Gypsy-10_DWil-I	4.64
(AAGCTGC)n	4.62
DMCR1A	4.62
Jockey-9_DY	4.62
(TTAAA)n	4.61
(AGGGAG)n	4.6
(AGTATGT)n	4.6
(ATAACTT)n	4.6
(ATCATT)n	4.6
(TTCTCCG)n	4.6
Transib-N1_DM	4.6
Gypsy-41_DEl-I	4.59
(AACTTA)n	4.58
(CCATTCA)n	4.58
(CGTATA)n	4.58
Jockey-1_DF	4.58
(TCCAGTG)n	4.57
Gypsy-8_DBi-I	4.57
Jockey-11_DBp	4.57
Gypsy7-I_Dpse	4.54
(TTCTAT)n	4.53
Gypsy-6_DPer-I	4.51
I-4_DBp	4.51
Rehavkus-1_DY	4.51
dmel_rDNA_28S_rDNA	4.51
(AACTTAA)n	4.5
(AATTGGC)n	4.5
(ACAGATCAC)n	4.5
(AGGATA)n	4.5
(ATAGCC)n	4.5
(ATCTTA)n	4.5
(ATGCTGG)n	4.5
(ATTCAGCC)n	4.5
(ATTTACC)n	4.5
(CAATGTT)n	4.5
(CACAATC)n	4.5
(CATCCTGG)n	4.5
(CCAACTG)n	4.5
(CCATGCA)n	4.5
(CTAATCG)n	4.5
(CTCTACT)n	4.5
(GATTTAA)n	4.5
(GCCTAC)n	4.5
(GGCATTCT)n	4.5
(GTGATCA)n	4.5
(GTTCGTT)n	4.5
(TAAGC)n	4.5
(TACCATA)n	4.5
(TACCATTT)n	4.5
(TATAATA)n	4.5
(TATACAT)n	4.5
(TATAGTT)n	4.5
(TATCCCA)n	4.5
(TATCGGC)n	4.5
(TCACC)n	4.5
(TCAGGA)n	4.5
(TCGTATT)n	4.5
(TGCGAAA)n	4.5
(TGGCTATC)n	4.5
(TTGAA)n	4.5
(TTGTCCG)n	4.5
(TTTAGA)n	4.5
Gypsy-57_DWil-I	4.5
LOA-2_DGri	4.5
(TTTAAT)n	4.49
MICROPIA_LTR	4.49
(TTTAA)n	4.48
(CTTATA)n	4.47
(TGTTAT)n	4.47
Helitron-1_DT	4.47
(AATTTCC)n	4.46
(TCAACT)n	4.46
(AATTT)n	4.44
(GATTTCG)n	4.44
BEL-21_DWil-I	4.44
(CGATAA)n	4.43
(ATTTGG)n	4.41
(GATTT)n	4.41
(ATATTTAC)n	4.4
(ATCCAA)n	4.4
(GACTG)n	4.4
(GTATTT)n	4.4
(TCATAGA)n	4.4
Jockey-2_DEl	4.4
Jockey2	4.39
BLASTOPIA_LTR	4.37
Gypsy-6_DGri-I	4.36
BEL-5_DYa-I	4.35
(ACATG)n	4.33
(AGGGTA)n	4.33
(ATGAGA)n	4.33
(CATCATT)n	4.33
(CGAAAC)n	4.33
(CGTCGT)n	4.33
(GACCTGT)n	4.33
(GAGATCA)n	4.33
(GGAAGTG)n	4.33
(GGCAAGAAG)n	4.33
(GGTCAGT)n	4.33
(TATATGC)n	4.33
(TATT)n	4.33
(TTGTA)n	4.33
(TTTCTCG)n	4.33
Gypsy9_LTR	4.33
Harbinger1_DYa	4.33
(AATATA)n	4.32
Gypsy-9_DSim-I	4.32
(ATCCTC)n	4.31
Copia-3_DEu-I	4.31
(TGGTTAC)n	4.3
Polinton-1_DK	4.3
(AATATAA)n	4.29
(ATCAA)n	4.29
(TAATATA)n	4.29
(TAG)n	4.29
(TTGAGTG)n	4.29
(TTTAGTT)n	4.29
(GTTGAT)n	4.27
(ACTAGG)n	4.25
(ATAACAG)n	4.25
(ATAGTT)n	4.25
(ATATTG)n	4.25
(ATCCGT)n	4.25
(ATCCTTC)n	4.25
(CACCACA)n	4.25
(CTATGT)n	4.25
(TCAAAA)n	4.25
(TCCGTCC)n	4.25
(TCTA)n	4.25
(TTACCCA)n	4.25
(TTCCCAG)n	4.25
(TTTTTTAG)n	4.25
Mariner-15_DF	4.25
(AGATAG)n	4.24
(GTA)n	4.23
(TACATG)n	4.23
BLOOD_LTR	4.23
Copia1-I_DM	4.23
(ATTCAG)n	4.22
(GTCCCGT)n	4.22
(ATAATAA)n	4.21
I-1_DAn	4.21
(CCTACA)n	4.2
(GCTTTCC)n	4.2
(GGATGTGCTA)n	4.2
(TCATGTT)n	4.2
(TGAATGC)n	4.2
(TGATTTTC)n	4.2
(TGGAGTG)n	4.2
(TTGCAAGG)n	4.2
(TTGTAC)n	4.2
BEL-4_DYa-I	4.2
Gypsy-24_DEl-I	4.2
Gypsy-30_DYa-I	4.2
Gypsy20-I_Dpse	4.2
(TATTTTA)n	4.18
G3_DM	4.18
Gypsy-26_DBp-I	4.18
(AATTCG)n	4.17
(CTTTCAC)n	4.17
(GACAGC)n	4.17
(GTCAACCA)n	4.17
(TCTCCGC)n	4.17
Gypsy-6_DSe-I	4.17
LOA-1_DPer	4.17
Transib-8_DAn	4.17
BEL-12_DEl-I	4.16
(TTGCGA)n	4.15
M4DM	4.15
(ATCGTT)n	4.14
(TTTGAT)n	4.14
(TTTTTGA)n	4.14
Penelope2_Dw	4.14
Nobel_I-int	4.13
(TACA)n	4.12
(AATTGCA)n	4.11
(ATTCTGC)n	4.11
(CTAACT)n	4.11
(TGAGTAC)n	4.11
[truncated: 8,093 more rows]

## Sheet: replicate 2
Figure 2-source data 3. Rhino ChIP-seq enrichment scores for all repeats in the genome. Data from (Mohn, et al. 2014; Zhang, et al. 2014; Parhad, et al. 2017).
#repeat	#chip/input(RPM)
(ATTATGT)n	128.5
Jockey-12_DBp	111.5
(ATGTCGC)n	91
(ATCTTAC)n	84
(GCAAATT)n	81
Zator-1_DF	62.67
(TTCCTG)n	60
(TATCTC)n	54
(TATGCTA)n	54
(ATTTGTT)n	44
I-1_DEu	43
(CATAATT)n	42.67
(TTATTTG)n	39
(ACATATA)n	36
(TCCTCAG)n	36
(AAATCT)n	35
(TACAATG)n	35
(GAGTATCT)n	34
(TACCTA)n	34
(TCAGCTT)n	34
(AATTTGT)n	33
(TGCAGGT)n	33
(ATTCCAG)n	32
(TTTAAA)n	32
(ACCTCCC)n	30
(CGATTGC)n	30
(GTAAT)n	30
(AAACTT)n	29.67
(CCCTTTC)n	28
(CCTCAA)n	28
(ATAAACT)n	27.75
(TACTC)n	27
(TAATCAAT)n	26
Gypsy-2_DRh-LTR	25.91
(TATTTAA)n	24.25
(AAAAGGC)n	24
(CCTCTGA)n	24
(CAATTAA)n	23.5
(ATACTGA)n	23
(CTCCGCT)n	23
(CTTTGTG)n	23
(GTTTGCTA)n	23
(TAATTC)n	23
(TTAATAC)n	23
(TTCCCTT)n	23
(GATATAAA)n	22.5
(TATACAA)n	22.33
(ATATCTT)n	22
(CTCTAGA)n	22
(GCACCATT)n	22
(TCCCTCC)n	22
(TGGTGCTGA)n	22
(TTGCACT)n	22
(ATTTGAC)n	21.25
(ATTATGC)n	21
(CCGGAT)n	21
(TGGCTGGA)n	21
(TATAGTA)n	20.5
(ACAGAAG)n	20
(CCGAAGA)n	20
(GAATCCT)n	20
BEL-5_DEl-I	20
piggyBac-2_DF	20
Gypsy-5_DKi-LTR	19.97
(CGTAA)n	19.75
(CCGAGA)n	19.5
(CTGTGT)n	19.2
(AATCT)n	19
(AATTCGT)n	19
(ACAGTTT)n	19
(ATCGGAA)n	19
(CAGCAAG)n	19
(CATATATGTA)n	19
(CTCATGC)n	19
(TCATC)n	19
(TTCGTAT)n	19
(CCACATC)n	18.67
(ATCTCT)n	18
(ATCTCTT)n	18
(TCCGTGC)n	18
(TCGTCTC)n	18
(TCTAG)n	18
BEL-17_DAn-I	18
DNA3-1_DTa	18
Gypsy-11_DRh-I	18
Gypsy-3_DSe-I	17.46
(AACGTAT)n	17
(AAGTGCA)n	17
(AATGC)n	17
(AGGACAC)n	17
(ATACCCA)n	17
(TAACTTA)n	17
(TCCGTAC)n	17
(TTGCTTG)n	17
(TAAGGA)n	16.67
Copia-2_DAn-I	16.67
(ACCGGA)n	16.5
(AGTTTTA)n	16.5
(CGATTTG)n	16.5
(ATATACA)n	16.33
piRNA_cluster_42AB	16.13
(AAAGTG)n	16
(ACCAGAC)n	16
(CTGAGCC)n	16
(GCCGAAT)n	16
(GGCAAGAAG)n	16
(GTATGGC)n	16
(TATGTGC)n	16
(TCTGGTA)n	16
(GCTCTTC)n	15.75
Outcast-1_DBi	15.68
(TACTGT)n	15.67
(CTTGAT)n	15.5
(ATTAATT)n	15.33
(TAACTG)n	15.33
Jockey-8_DEu	15.33
Copia-3_DBp-I	15.29
(TAATAATA)n	15.25
HETA_DSi	15.09
(AACTGT)n	15
(AGTATAA)n	15
(CAGGGA)n	15
(TTCCCGG)n	15
(TTTAGAA)n	15
Copia-2_DTa-I	14.77
(CTCTTG)n	14.5
(GAACGTG)n	14.5
Gypsy-8_DFi-I	14.4
Gypsy-62_DWil-I	14.33
(TTTTGTG)n	14.25
(CTATAA)n	14.17
(ACATGAA)n	14
(ACTGGTA)n	14
(ACTTCT)n	14
(ATTAACT)n	14
(CAGCACA)n	14
(CCACTCC)n	14
(CTCTGAT)n	14
(GGCAACCT)n	14
(TAGCAG)n	14
Gypsy-25_DAn-I	13.7
(CTGCC)n	13.67
(CGTCTT)n	13.6
(CGGTTCT)n	13.5
(GAAAACG)n	13.5
(GCATTAC)n	13.5
(GGACAGC)n	13.5
(TAATCT)n	13.5
(AAAGCAC)n	13
(AGGCAG)n	13
(CTGTGA)n	13
(GATTTCA)n	13
(GTCGTTT)n	13
(TATAAG)n	13
(TATTGA)n	13
(TGCAATC)n	13
(TTATCG)n	13
Jockey-2_DBp	13
(ATTCGC)n	12.8
Gypsy-47_DEl-I	12.75
(AAAGAA)n	12.67
(AATCCTT)n	12.67
(ATATACAA)n	12.5
(ATCGGATCGT)n	12.5
(CCCACTC)n	12.5
(TTCTTAA)n	12.5
(AATAACA)n	12.43
Gypsy-7_DSe-LTR	12.34
TART_B1	12.34
(GAGATC)n	12.33
(TCTCAGTT)n	12.33
Gypsy-15_DBp-I	12.15
(TTTTGTA)n	12.1
(AAAAAT)n	12
(ACAGTA)n	12
(AGAGTG)n	12
(ATTCAAT)n	12
(ATTCAC)n	12
(CCCACAA)n	12
(CCCACTAC)n	12
(GAGAAG)n	12
(GATGTATG)n	12
(GTATGGTATA)n	12
(GTCTGTT)n	12
(GTGATCA)n	12
(GTTCTTT)n	12
(TAAATATG)n	12
(TTTCGCC)n	12
(TTTGGAC)n	12
Gypsy-28_DYa-LTR	12
Mariner-6_DBi	12
Homo1	11.98
(CTCGACT)n	11.75
Jockey-4_DK	11.6
(AACGATT)n	11.5
(TAATCGT)n	11.5
(TCTGA)n	11.5
Gypsy-24_DAn-I	11.5
(GATCA)n	11.38
(ACAACAC)n	11.33
(ATAGCGT)n	11.33
(TCTGTCC)n	11.25
(TGCCCCG)n	11.25
Mariner-2_DVi	11.25
BEL-9_DWil-I	11.23
(TCAATGT)n	11.18
(ACAATAA)n	11
(ACAATGG)n	11
(ATAACAG)n	11
(ATAATTAA)n	11
(ATATAAA)n	11
(TACTGA)n	11
(TTAGCAA)n	11
Gypsy-8_DRh-I	11
(ACTCCAT)n	10.88
Transib-3_DRh	10.83
(AACGAT)n	10.8
(TACATAA)n	10.8
(ATACGA)n	10.67
Invader6_I-int	10.63
Outcast-2_DAn	10.63
(ACAACGG)n	10.5
(ACTCCCC)n	10.5
(AGATTA)n	10.5
(ATATACT)n	10.5
(ATATAGA)n	10.5
(ATCAATC)n	10.5
(ATTTGTCCC)n	10.5
(CTTAGTC)n	10.5
(TGGTTA)n	10.5
(CTGCTAA)n	10.47
NOF_FB	10.45
(TTTTGAT)n	10.44
(GCTCCCG)n	10.33
(TAGCTT)n	10.33
Gypsy-18_DAn-I	10.29
Gypsy-7_DEl-LTR	10.28
(TTTAGTT)n	10.25
(CAGATCC)n	10
(GAAGTCA)n	10
(GTAACG)n	10
(GTCTTCC)n	10
(GTTATC)n	10
(GTTCACA)n	10
(TACAAA)n	10
(TCCGTAT)n	10
(TCGTTGT)n	10
Mariner-24_DF	10
hAT-3_DRh	10
(AATAATA)n	9.95
(CATATTT)n	9.88
(TTAATTT)n	9.88
(GATATAA)n	9.83
(GAGTA)n	9.8
(AAGCT)n	9.75
Gypsy-10_DBp-I	9.75
Gypsy-14_DFi-I	9.7
(CACTGT)n	9.67
(AAGCAC)n	9.57
HETA	9.54
(AGAACCG)n	9.5
(AGGCAGA)n	9.5
(CATGCTG)n	9.5
(CCTGAAT)n	9.5
Copia-1_DFi-I	9.5
Mariner-3_DEl	9.5
Nobel_LTR	9.5
piggyBac-3_DAn	9.5
(AGTTCG)n	9.4
BEL-1_DBp-I	9.38
(ACACAGAT)n	9.33
Gypsy13-I_Dpse	9.28
(AAATGGT)n	9.25
Gypsy-19_DTa-I	9.23
(TTCGTAG)n	9.18
(TTACTT)n	9.17
(TTGTTTA)n	9.17
(AGAAGT)n	9.14
(TTATAAT)n	9.13
(CCAGTCT)n	9.1
(TAATTAA)n	9.09
(GTCTCC)n	9.08
Invader6_LTR	9.06
(AATAGAATGG)n	9
(ATAGTTT)n	9
(CACACCG)n	9
(CCCCAATT)n	9
(CTGCCTC)n	9
(CTTAGACT)n	9
(GAATATA)n	9
(GAGATCA)n	9
(GGATGGC)n	9
(GGGAAGAGAG)n	9
(GTACTCC)n	9
(TACTAT)n	9
(TATATCAA)n	9
(TCAAAT)n	9
(TCCAAC)n	9
(TCCTCGA)n	9
(TGAAT)n	9
(TGACGT)n	9
(TGCACAA)n	9
(TTAGCCA)n	9
Copia-1_DSe-I	8.87
(GTGACA)n	8.83
(GATGCAG)n	8.8
hAT-2_DSe	8.77
(AGCAGCAGG)n	8.75
(GGGACG)n	8.75
WORF_DMi	8.75
(ACACT)n	8.67
(AGTATC)n	8.67
(ATGGTTA)n	8.67
BEL-5_DAn-I	8.67
(CACCTT)n	8.5
(CTCGGTG)n	8.5
(GGATTAT)n	8.5
(TAACTAT)n	8.5
(TCACTCT)n	8.5
(TTAACT)n	8.5
CR1-2_DEl	8.5
Kiri-1_DTa	8.5
Gypsy-41_DAn-I	8.48
(AATTCTA)n	8.4
Harbinger-1N1_DRh	8.4
Gypsy-2_DAn-I	8.36
HETRP_DM	8.34
(CCAGAGT)n	8.33
(GAATTT)n	8.33
(TCCAGAT)n	8.33
(GTCCCTC)n	8.29
(ATCGAGC)n	8.25
(ATGC)n	8.2
(CAAGT)n	8.2
Howilli2	8.2
(TTGCAA)n	8.19
Copia-5_DAn-I	8.19
(ATCTTGT)n	8.17
(TGAAC)n	8.15
(AATATC)n	8.12
(TTCCAG)n	8.12
(AAATGAA)n	8
(ACATAAT)n	8
(ATTTAAC)n	8
(ATTTTCAT)n	8
(CAGACTT)n	8
(CCCACTA)n	8
(CGTGCTT)n	8
(CTGGTAT)n	8
(GAATGT)n	8
(GGACGCA)n	8
(GGCTATAT)n	8
(GTAATTA)n	8
(GTGTGGAT)n	8
(TGTGTGGG)n	8
PARISa_DPe	8
(CAAATA)n	7.9
(AAGTAA)n	7.86
(TGGTATT)n	7.86
Gypsy22-I_Dpse	7.86
(AAACTGA)n	7.83
(ATTATG)n	7.83
(TTCCCCG)n	7.83
(ACGTT)n	7.8
(TTGCTAG)n	7.8
(CTGGTAA)n	7.75
(TACACA)n	7.75
Gypsy-25_DP-LTR	7.75
Gypsy-7_DSe-I	7.7
(ATGCCAA)n	7.67
(TCTTTAT)n	7.67
(TTATTCA)n	7.67
Jockey-10_DY	7.67
Transib-4_DAn	7.67
Gypsy-23_DYa-I	7.61
(ACACG)n	7.6
(ACTGACTA)n	7.5
(ATCTTGC)n	7.5
(TGAATAA)n	7.5
(TGTACGATT)n	7.5
(TTGACATT)n	7.5
BEL-15_DP-I	7.5
TAHRE	7.49
Gypsy-28_DAn-LTR	7.44
(GTCTGT)n	7.43
Gypsy-4_DAn-LTR	7.42
(TCTTCC)n	7.34
(ACATGT)n	7.33
(TCTCG)n	7.33
Transib-1_DK	7.33
BEL-13_DP-I	7.32
Homo3	7.29
BEL-3_DWil-I	7.27
(AGCAAAT)n	7.25
(CATATTA)n	7.25
(CGATCCG)n	7.25
(ATATCAA)n	7.2
R1-5_DYa	7.16
Gypsy-32_DAn-I	7.12
(AGAACG)n	7.11
(ATAATG)n	7.11
(ATTTAC)n	7.07
(ACATTTT)n	7
(ACTTGGA)n	7
(ATACTA)n	7
(ATCAC)n	7
(ATCGGCA)n	7
(ATGTACAT)n	7
(ATTTCAGT)n	7
(CACCTTT)n	7
(CCATGGA)n	7
(CCTTCCT)n	7
(CGATCCT)n	7
(CGCTGCC)n	7
(CGGGTAA)n	7
(CGTTCGC)n	7
(CTCTA)n	7
(GAGAGTG)n	7
(GGACATCA)n	7
(TACTCGG)n	7
(TAGAGA)n	7
(TCCCACA)n	7
(TGTTAC)n	7
(TTAATTC)n	7
(TTACGT)n	7
(TTATTGT)n	7
(TTGGCG)n	7
(TTTCTTG)n	7
Gypsy2-I_DV	7
(AATAATT)n	6.95
(TGCATCC)n	6.92
(ATTGCG)n	6.88
(TTAATG)n	6.86
(AGGAGCAGA)n	6.83
Jockey-3_DRh	6.83
(AGTGCG)n	6.8
(TCTTGTA)n	6.8
(CTCTCCT)n	6.75
(TGTAAA)n	6.75
Copia-1_DGri-I	6.75
I-2_DYa	6.75
(ATGCAT)n	6.74
(TTACAT)n	6.73
(TATATAG)n	6.71
(TTCGTA)n	6.71
BEL-4_DEu-I	6.71
(AATATTG)n	6.67
(AGCAAGT)n	6.67
(CACTCAA)n	6.67
(TAAAAC)n	6.67
(TGAATGTT)n	6.67
(TTCGAGT)n	6.67
Mariner-14_DK	6.67
(TCGATCT)n	6.62
(TGATAA)n	6.62
piggyBac-1_DEu	6.62
(GGTGAT)n	6.6
(TTCTATA)n	6.6
NINJA_LTR	6.6
Gypsy-24_DYa-I	6.59
(GTCCAAT)n	6.58
hAT-4_DBp	6.54
Transib-2_DRh	6.52
(ACAAAAA)n	6.5
(ACAAGCA)n	6.5
(ACATTAA)n	6.5
(ACTAA)n	6.5
(ATCCGATCCC)n	6.5
(CACACCA)n	6.5
(CAGGCTA)n	6.5
(CCCGCATTTT)n	6.5
(CGACCCT)n	6.5
(GGTTACT)n	6.5
(TACCATA)n	6.5
(TAGCTGA)n	6.5
(TATGGA)n	6.5
(TGAGATACTT)n	6.5
(TGGATAC)n	6.5
Jockey-13_DAn	6.5
Copia1-I_Dpse	6.48
Gypsy-24_DYa-LTR	6.48
(ATGTGC)n	6.44
(GACTGCA)n	6.44
(TTAATTA)n	6.44
Hoana6	6.42
(TATGGTA)n	6.4
Gypsy-41_DAn-LTR	6.4
Gypsy12-I_Dpse	6.38
(AAGTCAA)n	6.33
(CCCTAC)n	6.33
(CGTAGTC)n	6.33
(TATGTC)n	6.33
(CATTCTG)n	6.29
(CTACGG)n	6.29
Homo9	6.29
Gypsy-3_DGri-I	6.28
Gypsy5-I_Dya	6.27
Copia-1_DSim-I	6.26
MuDR-1_DEl	6.26
(ACATT)n	6.25
(GGAACGG)n	6.25
(TCAATTA)n	6.25
(TGTCTGGA)n	6.25
(TTCTAA)n	6.22
(GCTGAAT)n	6.2
(ATGTA)n	6.19
(AGTGAA)n	6.17
(ATTTCAA)n	6.17
(CATTTAC)n	6.17
BEL-17_DTa-I	6.17
Gypsy5-I_Dpse	6.17
(ATTTTCA)n	6.16
(CTACA)n	6.15
(TACACAT)n	6.15
Dtripu2cons	6.15
(AACTGAC)n	6.14
Gypsy-13_DRh-I	6.14
Gypsy-1_DVir-I	6.14
Jockey-12_DAn	6.14
(CTCCACA)n	6.12
Gypsy-3_DBi-I	6.11
(AATTG)n	6.09
Gypsy-7_DSim-LTR	6.09
hAT-3_DBp	6.09
(ATTACT)n	6.08
(TATTAA)n	6.05
(AAGTTAT)n	6
(AATGCTAA)n	6
(AATTAAC)n	6
(ACAGGT)n	6
(AGATGA)n	6
(AGTTACC)n	6
(ATAATTG)n	6
(ATGGAGG)n	6
(ATGTCT)n	6
(ATGTTA)n	6
(ATTTCTG)n	6
(CAGCTAC)n	6
(CCCAACC)n	6
(CTCCTGG)n	6
(GAGCAC)n	6
(GATCGCG)n	6
(GCAGGAAG)n	6
(GGCATCCTGT)n	6
(GGCGGAA)n	6
(GTCAGTT)n	6
(GTCCTA)n	6
(TAACT)n	6
(TAAGTAG)n	6
(TACCAAC)n	6
(TATACT)n	6
(TGAGTA)n	6
(TGGCTTTC)n	6
(TTATGTT)n	6
(TTCGCCC)n	6
(TTGCCTT)n	6
(TTTAATG)n	6
CR1-4_DK	6
Gypsy-11_DBp-I	6
Gypsy-1_DG-LTR	6
Gypsy-6_DEl-LTR	6
R1-1_DRh	6
Jockey-3_DSim	5.98
SPOCK_DMi	5.98
BEL-8_DEl-LTR	5.95
(CAACATG)n	5.94
(TTTTAAT)n	5.93
(TGATATA)n	5.91
Chimpo_LTR	5.91
BS	5.88
Jockey-2_DSim	5.88
(TGTGTGT)n	5.87
(CTATAC)n	5.86
(GGTATTC)n	5.86
BEL-3_DYa-LTR	5.86
(ATTCAT)n	5.85
(TCAGTTC)n	5.83
(AGCGAA)n	5.81
(CTGAAA)n	5.8
(TGCCAGT)n	5.79
(TTGTAA)n	5.79
(AGCGT)n	5.75
(ATCCGGA)n	5.75
(CAGGGGT)n	5.75
(CATCTTG)n	5.75
(CTGATCC)n	5.75
(TGATC)n	5.75
BEL-15_DTa-I	5.75
BEL-13_DWil-I	5.73
Gypsy11-I_Dpse	5.73
Gypsy-13_DEu-I	5.72
(AGCTGAA)n	5.71
(CCGTAT)n	5.71
(CAGCAACAA)n	5.7
(CTCTTAA)n	5.7
Gypsy-17_DBp-I	5.7
(GCGAAT)n	5.69
Gypsy1-I_Dya	5.68
(AGGATCA)n	5.67
(ATACTC)n	5.67
(CATCCTTGG)n	5.67
(CCCGCAT)n	5.67
(GAATGA)n	5.67
(GCTGAACG)n	5.67
(GTGTAG)n	5.67
(TAATC)n	5.67
(TATTGT)n	5.67
(TCCCGAG)n	5.67
(TTCCCT)n	5.67
hAT-2_DBp	5.64
hAT-2_DK	5.62
(TTAGT)n	5.61
VEGE_DW	5.61
(AACAACA)n	5.6
(GACAGG)n	5.6
(GCACACA)n	5.6
(GCATCG)n	5.6
(GGCATTG)n	5.6
(ATATACC)n	5.59
(AATCACA)n	5.58
(TGAGGCA)n	5.57
(CAGCAACAG)n	5.56
(GCACTC)n	5.56
(GTGCA)n	5.56
Jockey-6_DVi	5.56
R2_DSi	5.54
(TCCGTCC)n	5.53
Jockey-2_DEl	5.53
Chouto_I-int	5.52
(AAAAATC)n	5.5
(AACTGGA)n	5.5
(ATAAGTT)n	5.5
(ATCGTG)n	5.5
(CACCTCC)n	5.5
(CCTGTG)n	5.5
(CTCCAGATC)n	5.5
(CTTACA)n	5.5
(GAACAT)n	5.5
(GAGATTT)n	5.5
(GCCAAAA)n	5.5
(GTGCCT)n	5.5
(TAAC)n	5.5
(TGAGAT)n	5.5
(TGGAATT)n	5.5
Gypsy5-LTR_Dya	5.5
(GGATAC)n	5.45
(TCTTCG)n	5.44
Gypsy-27_DYa-LTR	5.44
Copia-2_DKi-I	5.42
(CAATT)n	5.41
(AGTCTAG)n	5.4
(ATGTT)n	5.4
(TAAACG)n	5.4
(TCGCATTGCA)n	5.4
(TCGTCT)n	5.4
(ACTTTT)n	5.38
(TTCTCA)n	5.38
Copia-2_DYa-LTR	5.38
Transib4_DP	5.38
Gypsy-2_DSe-I	5.37
(GTCATTCA)n	5.36
I-1_DBp	5.36
Gypsy13-I_Dya	5.35
(AACCTCG)n	5.33
(ACCATGG)n	5.33
(ACTGAAC)n	5.33
(ACTTTG)n	5.33
(ATCGGT)n	5.33
(ATCTCCC)n	5.33
(CACTATC)n	5.33
(GTCCACA)n	5.33
(TACAGT)n	5.33
(TATCTAC)n	5.33
(TTCTGTG)n	5.33
Gypsy-27_DWil-I	5.33
I-6_DBp	5.33
Mariner-4_DBp	5.33
Mariner-8_DBp	5.33
Polinton-2_DBi	5.33
(ATATATAC)n	5.31
Homo5	5.29
Gypsy-10_DAn-I	5.28
(AACCTC)n	5.27
(GACCA)n	5.27
(AATAGA)n	5.25
(CAGAG)n	5.25
(CTAGG)n	5.25
(GCAAGCA)n	5.25
(GGGTT)n	5.25
(TTTAGCA)n	5.25
LOOPER1_DM	5.24
(TGAAG)n	5.22
(CACATA)n	5.21
(CATACGGA)n	5.2
(GTGCTA)n	5.2
(TATGTTA)n	5.2
(TCTACCT)n	5.2
Copia-2_Deu-LTR	5.2
(AATGAGA)n	5.17
(GTTGCTCA)n	5.17
Gypsy-9_DFi-I	5.17
ROOA_I-int	5.17
(CTGGACT)n	5.14
(TAGCTAA)n	5.14
Galileo_DW	5.12
Transib-6_DBp	5.12
(CCTGTTG)n	5.11
(GATTGC)n	5.11
BEL-3_DVir-I	5.11
(CGGTAA)n	5.1
(AAATT)n	5.08
(ATCTA)n	5.08
(GTTGTC)n	5.08
Mariner-3_DK	5.07
(TATCG)n	5.04
piRNA_cluster_80F	5.04
Gypsy-7_DSim-I	5.03
Gypsy-16_DRh-I	5.01
(AAAGCCAG)n	5
(AAATAGC)n	5
(AACATTT)n	5
(AAGGT)n	5
(ACAAACT)n	5
(ACTGGCC)n	5
(AGAAGGCTG)n	5
(AGATAG)n	5
(AGCACTG)n	5
(AGGACGGAC)n	5
(AGTTTGCC)n	5
(ATATGGC)n	5
(ATCACCT)n	5
(ATCCGCG)n	5
(ATTCTAT)n	5
(CAAACTGG)n	5
(CAAGTAC)n	5
(CAATGATC)n	5
(CCCAGTG)n	5
(CCCCCAACTG)n	5
(CCCGTTT)n	5
(CCGGAA)n	5
(CGGCTATA)n	5
(CGTACC)n	5
(CGTTTC)n	5
(CTCCAGT)n	5
(CTGCGTC)n	5
(CTTACAA)n	5
(GAAGGG)n	5
(GATATT)n	5
(GCAGGTT)n	5
(GCAGTGA)n	5
(GCCGAGT)n	5
(GGGACA)n	5
(GGTGGTAGGT)n	5
(GGTTCGA)n	5
(GTGTAA)n	5
(GTTGATG)n	5
(GTTTTCTG)n	5
(TCTCAC)n	5
(TGCATTC)n	5
(TGGCTATC)n	5
(TGTATCCG)n	5
(TGTCCAG)n	5
(TTAAGA)n	5
(TTAGGG)n	5
(TTGTTCC)n	5
(TTTCAC)n	5
(TTTCACT)n	5
BEL-2_DSe-LTR	5
CR1-5_DRh	5
Copia-1_DBi-I	5
Gypsy-6_DPer-I	5
TLD2	5
(CTTTA)n	4.97
R1-1_DYa	4.97
(AATATA)n	4.96
(TTACATT)n	4.95
Gypsy20-LTR_Dya	4.94
Baggins1	4.93
I-2_DBi	4.93
piRNA_cluster_38C1	4.93
DM1731_I-int	4.92
Jockey-6_DEu	4.92
(AAGA)n	4.91
Gypsy-6_DSim-LTR	4.91
(ATGTTG)n	4.9
Gypsy-9_DMoj-LTR	4.9
(TTCAGTT)n	4.88
(GTATAT)n	4.87
Jockey-2_DAn	4.87
MARINA	4.87
(CCCTGAA)n	4.86
(TTCTAGA)n	4.86
(ATCAGT)n	4.85
(CTTTTA)n	4.84
Copia-1_DWil-I	4.84
R1-3_DYa	4.84
(CGCTTT)n	4.83
(GACGGAG)n	4.83
Gypsy-6_DGri-I	4.83
Gypsy17-I_Dpse	4.83
BEL-4_DBi-I	4.82
Gypsy-52_DWil-I	4.82
(ATGATA)n	4.81
(TATATAC)n	4.81
ROO_LTR	4.81
(ATAATGAA)n	4.8
(GATCTTG)n	4.8
(TCCAGTG)n	4.8
(TCCGT)n	4.8
(TCGTC)n	4.8
(TGTTAA)n	4.8
(TTGCATA)n	4.8
CR1-2_DT	4.8
(ACGCAT)n	4.78
ACCORD2_LTR	4.78
Gypsy-28_DYa-I	4.76
(AGACAGA)n	4.75
(AGCATTT)n	4.75
(ATTTTAC)n	4.75
(CCACTGT)n	4.75
(CCCGTGC)n	4.75
(CTGGGAA)n	4.75
(GATCGAC)n	4.75
(GTCGGTG)n	4.75
(TGACCA)n	4.75
(TGCCATA)n	4.75
(TGGAAC)n	4.75
(TGTCCGTAA)n	4.75
(TTTACTC)n	4.75
(TGATA)n	4.74
Gypsy-8_DTa-I	4.74
R1-7_DPer	4.72
(ACTTGT)n	4.71
(AGTAACC)n	4.71
(CACCATAG)n	4.71
(CATTTCG)n	4.71
(TTACGGT)n	4.71
(GAATGGA)n	4.7
BEL-4_DRh-I	4.7
hAT-N1_DK	4.69
(CACTACT)n	4.67
(CAGTTA)n	4.67
(CCCATCTA)n	4.67
(GAGCGGA)n	4.67
(GCAGATAC)n	4.67
(GTATA)n	4.67
(TAGTGTA)n	4.67
(TCCGAG)n	4.67
(TCGCTCC)n	4.67
Gypsy12_I-int	4.67
(TTCATA)n	4.66
Gypsy-25_DYa-I	4.66
Jockey-10_DRh	4.66
Mariner-4_DY	4.66
(CCTATC)n	4.64
(ATGACT)n	4.62
(TGAATG)n	4.62
Gypsy-4_DAn-I	4.62
Jockey-3_DM	4.62
(ACAGCT)n	4.6
(TAAATGG)n	4.6
(TAAGC)n	4.6
(TTAAAA)n	4.6
(TTTGCCAT)n	4.6
Gypsy-24_DY-I	4.6
Gypsy-9_DRh-I	4.6
(ATTTATA)n	4.57
(ATTCTGC)n	4.56
R2_DM	4.56
(ATTAAGA)n	4.55
I-3_DK	4.55
Gypsy-4_DSe-I	4.54
Gypsy-13_DVir-I	4.52
(AAGGACA)n	4.5
(AATAACC)n	4.5
(AATAGTA)n	4.5
(ACACGG)n	4.5
(ACCCTC)n	4.5
(AGATCCC)n	4.5
(ATACCGA)n	4.5
(ATTTAAT)n	4.5
(CAACCTG)n	4.5
(CATCTT)n	4.5
(CGTTCT)n	4.5
(TACCCAGC)n	4.5
(TAGATC)n	4.5
(TAGTAT)n	4.5
(TATCCCA)n	4.5
(TATGTTT)n	4.5
(TGGTAA)n	4.5
(TTTTATCG)n	4.5
BEL-5_DAn-LTR	4.5
Gypsy-15_DBi-I	4.5
(GACACA)n	4.49
(TACATT)n	4.48
Gypsy-13_DAn-I	4.48
(ACATGACATT)n	4.47
(TAGTT)n	4.47
(TTTATTA)n	4.47
Transib-6_DAn	4.47
PLACW_DM	4.46
(AAAATACG)n	4.45
(AGATTG)n	4.45
(TAGTA)n	4.45
(TATAATT)n	4.45
(ATATATG)n	4.44
(CTGTTA)n	4.44
(GAACTG)n	4.44
(CCTATA)n	4.43
(TCTCTTC)n	4.43
(TGGTAAA)n	4.43
Copia-1_DSim-LTR	4.43
INV2j_DB	4.43
(CTCGGA)n	4.42
Gypsy-19_DWil-I	4.42
Jockey-3_DF	4.41
Jockey2	4.41
RSP-LIKE_SAT	4.41
(AAGAACA)n	4.4
(AATGTAA)n	4.4
(ATCCTGG)n	4.4
(ATCTAA)n	4.4
(ATCTATAT)n	4.4
(CATTAT)n	4.4
(CCCAGGA)n	4.4
(TACTAA)n	4.4
(ATAATA)n	4.38
(TCAACA)n	4.38
(TTATAA)n	4.37
(AATTTTA)n	4.36
Invader3_LTR	4.36
Jockey-3_DT	4.36
Jockey-7_DYa	4.36
Gypsy-20_DBp-I	4.35
Jockey-14_DBp	4.35
(AACAGAC)n	4.33
(CCATGCA)n	4.33
(CCCGTT)n	4.33
(CCTACCA)n	4.33
(CTCTTCT)n	4.33
(GCTGTCT)n	4.33
(GTGTCCT)n	4.33
(ATATTTA)n	4.31
(CACTAC)n	4.3
(GGGATT)n	4.3
Gypsy-33_DAn-I	4.3
(TTGAGTG)n	4.29
Gypsy-4_DSe-LTR	4.28
Helitron-2N1_DVir	4.28
piRNA_cluster_38C2	4.27
(ATACT)n	4.26
(TATCCG)n	4.26
Transib-4_DBp	4.26
(ACCAGGT)n	4.25
(AGTCTGG)n	4.25
(ATCTCGA)n	4.25
(ATGGACC)n	4.25
(CCTGATG)n	4.25
(CGAATGT)n	4.25
(GCATGGA)n	4.25
(TACCGA)n	4.25
(TCAAGAT)n	4.25
(TTGCAC)n	4.25
(AGAATC)n	4.24
BEL-2_DAn-I	4.24
Gypsy-4_DSim-LTR	4.24
(CGAGATT)n	4.23
(TCACAT)n	4.23
Gypsy-3_DKi-I	4.23
(AATTGC)n	4.22
(ACTAGCA)n	4.22
(CAGCATT)n	4.22
(GAAGCC)n	4.22
BEL1-I_DV	4.22
Gypsy-2_DBp-I	4.22
Gypsy-6_DRh-I	4.21
(ATACGCA)n	4.2
(ATCCAACA)n	4.2
(ATTCAGT)n	4.2
(GAACTGG)n	4.2
(GATATG)n	4.2
(TTGTTC)n	4.2
Copia1-I_DM	4.2
hAT-6_DBp	4.2
(ATAGCT)n	4.18
(AGATTTT)n	4.17
(CAATAAA)n	4.17
(TACT)n	4.17
BEL-5_DFi-I	4.17
Gypsy-11_DSim-I	4.16
Mariner-1_DPe	4.16
(TCCTTGT)n	4.15
BARI_DM	4.15
(AGACAA)n	4.14
(AGTGGAT)n	4.14
(CTTGTCTC)n	4.14
(GGTATCT)n	4.14
R1-1_DEl	4.14
(TATTAATA)n	4.12
(TTTAATAA)n	4.12
Gypsy-52_DEl-I	4.12
(AACATA)n	4.11
(ACACAAG)n	4.11
Mariner-8_DF	4.11
(AGTCTTC)n	4.1
(GTCCAG)n	4.1
(TATCAT)n	4.1
G3_DM	4.1
(AACTA)n	4.09
(ATGTAC)n	4.09
Hoana5	4.09
dmau_rDNA_ETS	4.09
(AACTTGC)n	4.08
(AAGACTA)n	4.08
(ATGGAT)n	4.08
(GCAGTGG)n	4.08
(GGAACATT)n	4.08
(TCGCTCTC)n	4.08
(TGTTA)n	4.08
(AGTTT)n	4.07
(CGTA)n	4.07
BEL-3_DFi-I	4.07
BEL-4_DEl-I	4.07
(ATATCT)n	4.06
BEL-17_DEl-I	4.06
Gypsy-13_DBi-I	4.04
(TATTTTG)n	4.03
Gypsy-19_DEl-I	4.03
Invader1_I-int	4.03
(TGTCTC)n	4.02
G7_DM	4.01
Gypsy_6B	4.01
Jockey-3_DVi	4.01
(AAAACCA)n	4
(AAAGAT)n	4
(AATATCA)n	4
(AATTCTC)n	4
(AATTTTG)n	4
(ACCCATC)n	4
(ACTAACA)n	4
(AGCAC)n	4
(AGCCACC)n	4
(AGGAGCAGC)n	4
(AGTTA)n	4
(AGTTTGT)n	4
(ATAATC)n	4
(ATCGCAT)n	4
(ATCGTTA)n	4
(ATCTAGT)n	4
(CAAGCCAC)n	4
(CAATTAT)n	4
(CACAGCT)n	4
(CACTTCT)n	4
(CATGAG)n	4
(CCACCGAA)n	4
(CCATTAT)n	4
(CCATTCC)n	4
(CCCGATC)n	4
(CCTATAG)n	4
(CGGATA)n	4
(CTAGTAG)n	4
(CTGTATC)n	4
(CTGTCC)n	4
(GAAAAA)n	4
(GAGCAGG)n	4
(GAGTCCG)n	4
(GCAGTTG)n	4
(GCCTAC)n	4
(GGAATTC)n	4
(GGACCAA)n	4
(GGACCAG)n	4
(GGGGAAT)n	4
(GTGGCAG)n	4
(GTTCAGA)n	4
(TAAATAA)n	4
(TAACG)n	4
(TACTATA)n	4
(TACTGG)n	4
(TCAACAGA)n	4
(TCGCTTA)n	4
(TCGTTTT)n	4
(TCTGGAG)n	4
(TGGTTTA)n	4
(TTATTC)n	4
(TTCCTTG)n	4
(TTGGTAGT)n	4
(TTGTAAG)n	4
(TTTAACA)n	4
(TTTAACT)n	4
(TTTTCCACA)n	4
(TTTTCTC)n	4
Gypsy-30_DAn-I	4
I-3_DAn	4
DOC6_DM	3.98
Gypsy-25_DEl-I	3.97
R1_DSi	3.97
Rehavkus-1_DY	3.97
hAT-1_DRh	3.97
(AAAATAC)n	3.96
ACCORD_LTR	3.95
(ATGCGT)n	3.94
Gypsy-17_DTa-I	3.94
(TCAACT)n	3.93
DMRT1A	3.93
(CACAATA)n	3.92
(CCTTGCT)n	3.92
(CATCTG)n	3.91
(CTTATA)n	3.91
(TCCTCCG)n	3.91
Gypsy-46_DEl-LTR	3.91
Jockey-3_DK	3.91
(AATTTA)n	3.9
(GGATTCT)n	3.9
(TGGGA)n	3.9
Rsp_SAT	3.9
Gypsy-6_DSe-LTR	3.89
(GATTCTC)n	3.88
(GCAATT)n	3.88
(GTTTGC)n	3.88
(TATGCGA)n	3.88
(TGCATAC)n	3.88
Howilli3	3.88
(TTGTATT)n	3.87
Invader4_LTR	3.87
(ATCCGTG)n	3.86
(CACAGTA)n	3.86
(GGAATA)n	3.86
(TCGAATCAC)n	3.86
(TCATTAT)n	3.85
DNA2-1_DAn	3.85
(AATATT)n	3.84
(ATTATA)n	3.84
BURDOCK_LTR	3.84
Gypsy-30_DWil-I	3.84
(AATGTA)n	3.83
(ACTCTAT)n	3.83
(ATAGC)n	3.83
(ATGGT)n	3.83
(GTTTAT)n	3.83
(TCGCAC)n	3.83
(TGTCAC)n	3.83
(TTTTGA)n	3.83
MICROPIA_I-int	3.83
(CGAA)n	3.82
(TCCTTGG)n	3.81
(TTTCATT)n	3.81
Gypsy-12_DSim-LTR	3.81
Gypsy2-I_DM	3.81
TRANSIB1	3.81
(AATAATAC)n	3.8
(AGCCAT)n	3.8
(ATTGTTA)n	3.8
(CCATTAC)n	3.8
(CGGAATGA)n	3.8
(GCAGCGA)n	3.8
(GCCAATT)n	3.8
(TAGATA)n	3.8
(TGGCCAC)n	3.8
Gypsy-8_DSim-I	3.8
(CAATTA)n	3.79
Gypsy-9_DSim-LTR	3.79
Invader5_LTR	3.79
(AATTAGA)n	3.78
(CATAGAA)n	3.78
(CGAAA)n	3.78
(CATTG)n	3.77
Jockey-10_DBp	3.77
(ATAAAT)n	3.76
DMCR1A	3.76
Gypsy-11_DEl-I	3.76
Polinton-1_DK	3.76
(ACAGG)n	3.75
(ACTATAT)n	3.75
(AGACGC)n	3.75
(AGATACA)n	3.75
(AGGAACA)n	3.75
(ATCTTCC)n	3.75
(ATTGTC)n	3.75
(CTGCGAA)n	3.75
(CTGGATG)n	3.75
(TTATTAG)n	3.75
(TTTTGCCA)n	3.75
Jockey-1_DSi	3.75
Jockey-5_DK	3.75
Polinton-1_DBi	3.75
BLOOD_LTR	3.74
DOC3_DM	3.74
Gypsy-15_DWil-I	3.74
(ACCGAT)n	3.73
(CATAGC)n	3.73
(CTCATT)n	3.73
(TATATCA)n	3.73
(TTTGGAA)n	3.73
Gypsy-10_DWil-I	3.73
Mariner-2_DT	3.73
BATUMI_LTR	3.72
DNA3-1_DF	3.72
G4_DM	3.72
(ATTTGC)n	3.71
(CCCAGAT)n	3.71
(CTCAGA)n	3.71
(TGACTA)n	3.71
(TTCCGTA)n	3.71
HELENA_RT	3.71
Hovi2	3.71
(CCACGCAT)n	3.7
Mariner-4_DK	3.7
(AATAG)n	3.69
(ATCGAG)n	3.69
(CTATATGG)n	3.69
(GGAACTG)n	3.69
G5_DM	3.69
BEL-6_DBp-I	3.68
BEL-8_DMo-I	3.68
Gypsy-22_DYa-I	3.68
(AAGATA)n	3.67
(AATCGC)n	3.67
(ACTTA)n	3.67
(AGAATGG)n	3.67
(AGAGAT)n	3.67
(ATACAAT)n	3.67
(ATAGCCG)n	3.67
(ATTACCA)n	3.67
(ATTTGTG)n	3.67
(CAAAG)n	3.67
(CACATGA)n	3.67
(GATCCGT)n	3.67
(GCTTTGA)n	3.67
(GGCAAAAT)n	3.67
(GTCAACCA)n	3.67
(TACCTG)n	3.67
(TCCATTCTG)n	3.67
(TCTCATC)n	3.67
(TCTCGAA)n	3.67
(TGGCCGGT)n	3.67
(TGGTTGT)n	3.67
(TGTTATTAT)n	3.67
BARI1	3.67
BEL2-I_Dmoj	3.67
CR1-1_DPer	3.67
Chimpo_I-int	3.67
Gypsy-57_DWil-I	3.67
Jockey-4_DBp	3.67
TransibN1_DP	3.66
(TATCTA)n	3.65
(TTTTGCC)n	3.65
Gypsy-18_DBp-I	3.65
Invader5_I-int	3.65
(AACTAGA)n	3.64
Gypsy-8_DVir-I	3.64
Jockey-7_DF	3.64
(TCGGAA)n	3.63
STALKER4_LTR	3.63
(ATAAC)n	3.62
(ATAAGT)n	3.62
(GGATTAA)n	3.62
(GTCGA)n	3.62
(TATAGT)n	3.62
Gypsy-13_DSim-I	3.62
Invader2_LTR	3.62
(GCAAGG)n	3.61
(TAATATG)n	3.61
BS3_DM	3.61
(AAGACTCG)n	3.6
(ATAACTT)n	3.6
(CAACTTT)n	3.6
(CTCATA)n	3.6
(GGTATGGA)n	3.6
(TAAGAA)n	3.6
(TGCGAAA)n	3.6
(TTCTTCG)n	3.6
CR1-3_DEl	3.6
Gypsy1-I_Dmoj	3.6
(AAAGT)n	3.59
(ATTCCT)n	3.58
(TGAATCC)n	3.58
Gypsy-29_DYa-LTR	3.58
(AGGGAG)n	3.57
(TCTGTC)n	3.57
Helena_Ds	3.57
Transib-7_DBi	3.57
(AAGGACG)n	3.56
(AATGAC)n	3.56
(ATAGTA)n	3.56
(ATGCAAC)n	3.56
(TCGCTC)n	3.56
(TCTCCAC)n	3.56
(TGGGAA)n	3.56
Gypsy-12_DSim-I	3.56
(CGGTCTC)n	3.55
(TACGTA)n	3.55
G5A_DM	3.55
Jockey-4_DF	3.55
Gypsy8_LTR	3.54
RTE-1_DAn	3.54
(TCACTA)n	3.53
(AAGGAC)n	3.52
(TTCCATC)n	3.52
Gypsy-27_DYa-I	3.52
Gypsy-37_DWil-I	3.52
Gypsy6_I-int	3.52
Jockey-1_DBp	3.52
DM1731_LTR	3.51
Gypsy-2_DRh-I	3.51
Gypsy-32_DEl-I	3.51
(AACCCGT)n	3.5
(AGATACTC)n	3.5
(AGATCTC)n	3.5
(AGATTAT)n	3.5
(AGGCTG)n	3.5
(ATAAGCG)n	3.5
(ATTTTTC)n	3.5
(CACAACA)n	3.5
(CCTGC)n	3.5
(CGTGTCC)n	3.5
(CTGTCCGG)n	3.5
(GGCAT)n	3.5
(GGGAGT)n	3.5
(GTCACT)n	3.5
(TAAAGTT)n	3.5
(TAGATT)n	3.5
(TCATTA)n	3.5
(TCCCAACA)n	3.5
(TGATTGT)n	3.5
(TGCCTTT)n	3.5
(TGCTAA)n	3.5
(TGGAGTGA)n	3.5
(TGTGTGG)n	3.5
(TTAGCT)n	3.5
(TTCATAA)n	3.5
(TTTACG)n	3.5
Gypsy-38_DAn-LTR	3.5
Gypsy-53_DEl-I	3.49
ROOA_LTR	3.49
(TTTATA)n	3.48
1pt688.Contig101_locus	3.48
(AACATT)n	3.47
(GGTAT)n	3.47
(TTAC)n	3.47
BEL-6_DRh-I	3.47
Copia1-LTR_DM	3.47
Gypsy-15_DEl-I	3.47
Gypsy-31_DYa-LTR	3.47
P_DG	3.46
S_DM	3.46
(AATGA)n	3.45
(ATAGTAATA)n	3.45
(GATCCAA)n	3.45
(TAACAAT)n	3.45
Gypsy-40_DAn-I	3.45
Gypsy-8_DEl-I	3.45
(AGTCGG)n	3.44
(ATGCAACA)n	3.44
(GAGAAT)n	3.44
(TAACAGT)n	3.44
Gypsy7_I-int	3.44
Jockey-1_DAn	3.44
Mariner-5_DEl	3.44
(ATCCGAA)n	3.43
(CCTAGAA)n	3.43
(CGTTTGC)n	3.43
(TATACGGTC)n	3.43
CR1-1_DEl	3.43
DMRT1B	3.43
Helitron-N2_DEl	3.43
(AAATGGG)n	3.42
(ATCTAT)n	3.42
DIVER2_LTR	3.42
Gypsy-31_DEl-LTR	3.42
Gypsy-38_DAn-I	3.42
TRANSIB4	3.42
(ATGCAGG)n	3.41
(ATTTAA)n	3.41
(AATCCTC)n	3.4
(ACACGA)n	3.4
(ACGGACAA)n	3.4
(AGTGCA)n	3.4
(GACTAG)n	3.4
(GAGTACC)n	3.4
(GCGGAAAA)n	3.4
(GTATAC)n	3.4
(TGGAGTCC)n	3.4
Gypsy-33_DWil-I	3.4
Gypsy-50_DWil-LTR	3.4
(ATATTGT)n	3.39
(TTAT)n	3.39
BEL-14_DEl-I	3.39
DIVER_LTR	3.39
Transib-8_DAn	3.39
(AGCGGAA)n	3.38
(CTTTTCG)n	3.38
(GCATCCA)n	3.38
(TCAAG)n	3.38
ACCORD_I-int	3.38
Gypsy4_I-int	3.38
ROVER-LTR_DM	3.38
RTEX-1_DT	3.38
Transib-N1_DM	3.38
(CATAAT)n	3.37
(TTTTCTT)n	3.37
(ACATCAG)n	3.36
(CTTCGA)n	3.36
(GATGCTG)n	3.36
(GGAAAAT)n	3.36
(TAAGTA)n	3.36
(TTTTATA)n	3.36
(TTTTCTA)n	3.36
BEL-13_DTa-I	3.36
DM176_LTR	3.36
Gypsy-1_DRh-I	3.36
Gypsy6-I_Dya	3.36
R1-4_DYa	3.36
(TATCA)n	3.35
BEL-15_DEl-I	3.35
Jockey-1_DYa	3.35
(TAAAA)n	3.34
(TAATT)n	3.34
(TTTCGTT)n	3.34
BEL-7_DPe-I	3.34
(AAAAAAT)n	3.33
(AATATAG)n	3.33
(AATATGT)n	3.33
(ACAAGAA)n	3.33
(ACTGAAA)n	3.33
(AGAATTG)n	3.33
(ATGTAAC)n	3.33
(CAAGAGC)n	3.33
(CAAGCC)n	3.33
(CACTGGA)n	3.33
(CCAGGTT)n	3.33
(CGGTCA)n	3.33
(CTATGA)n	3.33
(CTCTACA)n	3.33
(GCCAAGT)n	3.33
(TAACGC)n	3.33
(TACCTC)n	3.33
(TACTTT)n	3.33
(TCCTCGCGA)n	3.33
(TCGGTAG)n	3.33
(TTAGTA)n	3.33
(TTATCTA)n	3.33
(TTGCAAGG)n	3.33
(TTTAAGA)n	3.33
MICROPIA_LTR	3.33
Mariner-4_DAn	3.33
Nobel_I-int	3.33
piggyBac-1_DW	3.33
(CACAC)n	3.32
(TGTCTT)n	3.32
BEL-12_DEl-I	3.32
Gypsy-41_DEl-I	3.32
(AATCAAT)n	3.31
(AGAACTC)n	3.31
(CTTTAA)n	3.31
(TTCCTA)n	3.31
(TTTAATT)n	3.31
BS2	3.31
Gypsy-3_DFi-I	3.31
I-4_DF	3.31
dmel_rDNA_18S_rDNA	3.31
hAT-2_DY	3.31
(GGCAG)n	3.3
Gypsy-18_DTa-I	3.3
(AATGGTG)n	3.29
(CAACACA)n	3.29
(CTTTATT)n	3.29
(GGTACT)n	3.29
(TACGGA)n	3.29
(TCTCGGT)n	3.29
(TGGAGCT)n	3.29
(TTTGTCA)n	3.29
Invader4_I-int	3.29
MuDR-1_DT	3.29
TIRANT_I-int	3.29
hAT-6_DRh	3.29
(ATACAA)n	3.28
BS4_DM	3.28
S2_DM	3.28
(AGCTCTC)n	3.27
(ATATC)n	3.27
(ATCCAT)n	3.27
(ATTATAT)n	3.27
BEL-3_DYa-I	3.27
I-5_DBi	3.27
(ATTTGG)n	3.26
(GTTTCTT)n	3.26
(TAATATT)n	3.26
(TCTATA)n	3.26
(TTAAC)n	3.26
BEL-1_DRh-I	3.26
Gypsy6A_LTR	3.26
Helitron1_DM	3.26
Mariner-17_DAn	3.26
(AAATATA)n	3.25
(AATATTC)n	3.25
(ACACCAT)n	3.25
(ACTCACT)n	3.25
(AGTCAGG)n	3.25
(ATATTAA)n	3.25
(GCATTTT)n	3.25
(GGAGACC)n	3.25
(GGAGATC)n	3.25
(GGATTGCAGT)n	3.25
(GGGAT)n	3.25
(GTATTTT)n	3.25
(CCATTTG)n	3.24
(TATTC)n	3.24
(TTACT)n	3.24
(TTTCAA)n	3.24
BEL-5_DVir-I	3.24
Jockey-1_DK	3.24
(ACTA)n	3.23
(GGACAC)n	3.23
DMTOM1_LTR	3.23
Pifo_I-int	3.23
TIRANT_LTR	3.23
(AATTGT)n	3.22
(ACTAT)n	3.22
(GGAGTGG)n	3.22
(TCATTTA)n	3.22
Copia-2_DYa-I	3.22
(CGTATA)n	3.21
(TTATTAA)n	3.21
BEL-14_DP-I	3.21
BEL-1_DPer-I	3.21
Gypsy5_LTR	3.21
LINEJ1_DM	3.21
(AAAATCG)n	3.2
(ACACTTTTA)n	3.2
(ACTGACA)n	3.2
(ATGGTAT)n	3.2
(ATTG)n	3.2
(CCCCGTA)n	3.2
(CTGCTCC)n	3.2
(CTTTGCCA)n	3.2
(CTTTTTTA)n	3.2
(GCAGTCT)n	3.2
(TAATGTTAA)n	3.2
(TACGT)n	3.2
(TCAGA)n	3.2
(TGCAGTC)n	3.2
(TGGGTA)n	3.2
(TGTTTTTG)n	3.2
(TTTATGC)n	3.2
Invader2_I-int	3.2
TRANSIB2	3.2
(AGTTCCC)n	3.19
(CAATAG)n	3.19
(GAATTC)n	3.19
GTWIN_LTR	3.19
(AAGTC)n	3.18
(AATTA)n	3.18
(CATTAC)n	3.18
(TCCAATG)n	3.18
Jockey-9_DY	3.18
(ATAGTAT)n	3.17
(ATAGTT)n	3.17
(ATGCT)n	3.17
(ATTGGGT)n	3.17
(CAACTAA)n	3.17
(CAAGCA)n	3.17
(GAATTCAA)n	3.17
(GTATAAT)n	3.17
(TAAGCTT)n	3.17
(TATACTAT)n	3.17
(TCGTTCT)n	3.17
Jockey-4B_DVi	3.17
(TCTGAA)n	3.16
Gypsy12-LTR_Dya	3.16
MAX_I-int	3.16
PROTOP_B	3.16
(CATCCT)n	3.15
(CCTCTGT)n	3.15
Copia-3_DAn-I	3.15
Polinton-1_DY	3.15
(AATACCG)n	3.14
(ACAGAC)n	3.14
(CACTTC)n	3.14
(CTACAA)n	3.14
(GATACA)n	3.14
(GTAT)n	3.14
(GTGTGGT)n	3.14
(TAATTTC)n	3.14
(TATGGC)n	3.14
(TCCGTTG)n	3.14
ACCORD2_I-int	3.14
Gypsy-27_DAn-I	3.14
Gypsy-46_DWil-I	3.14
Harbinger1_DYa	3.14
Mariner-12_DAn	3.14
(TAAA)n	3.13
BEL-1_DRh-LTR	3.13
Gypsy-17_DRh-I	3.13
Gypsy-3_DSim-I	3.13
(ATTCAG)n	3.12
(CGGGAA)n	3.12
(CTGCTA)n	3.12
(TAGCAA)n	3.12
(TCCAGAC)n	3.12
Gypsy-10_DMoj-LTR	3.12
Gypsy-42_DWil-I	3.12
Gypsy4-I_Dya	3.12
Gypsy9-I_Dya	3.12
PROTOP	3.12
TART-A	3.12
BLASTOPIA_LTR	3.11
Gypsy-42_DWil-LTR	3.11
Gypsy11-I_Dya	3.11
Jockey-1_DF	3.11
(AGTATTT)n	3.1
(AGTCAA)n	3.1
(ATGAACA)n	3.1
(CTCCTGA)n	3.1
(TCGT)n	3.1
(TGGTAC)n	3.1
BEL-1_DBi-I	3.1
Gypsy-5_DKi-I	3.1
Gypsy7-I_Dya	3.1
R1-2_DTa	3.1
Transib5	3.1
(ACGT)n	3.09
(ATAATAA)n	3.09
(ATATTTT)n	3.09
(GACGA)n	3.09
(GCAGCAT)n	3.09
(GGAGACG)n	3.09
(TAGT)n	3.09
Copia2_LTR_DM	3.09
Mariner-20_DAn	3.09
TC1-2_DM	3.09
Transib-1_DRh	3.09
Invader3_I-int	3.08
(ATACTAG)n	3.07
(CAAGTG)n	3.07
(CAGAATA)n	3.07
(TGTATGC)n	3.07
Gypsy-53_DWil-I	3.07
Mariner-9_DRh	3.07
(AAGAGC)n	3.06
(GGATA)n	3.06
(TTCATTA)n	3.06
Jockey-1_DEr	3.06
dmel_rDNA_28S_rDNA	3.06
Gypsy-24_DWil-I	3.05
Stalker2_LTR	3.05
(TGTCCAC)n	3.04
(AATATTT)n	3.03
(ACTTT)n	3.03
(CTCGCA)n	3.03
PROTOP_A	3.03
Gypsy-6_DSe-I	3.02
Gypsy-13_DFi-I	3.01
Gypsy-16_DBi-I	3.01
Gypsy-7_DFi-I	3.01
MDG1_LTR	3.01
(AAAATGG)n	3
(AAACACA)n	3
(AAACGA)n	3
(AATAGTT)n	3
(ACAGCAT)n	3
(ACATTT)n	3
(ACTCT)n	3
(AGAAAT)n	3
(AGCTACA)n	3
(AGGAGCC)n	3
(AGGATAT)n	3
(AGTGGCT)n	3
(AGTTACCA)n	3
(ATACGGT)n	3
(ATAGTGT)n	3
(ATATGCT)n	3
(ATCCAGT)n	3
(ATCGAC)n	3
(ATTAAAT)n	3
(ATTAACG)n	3
(ATTTAG)n	3
(CACCT)n	3
(CAGTTTC)n	3
(CATAACT)n	3
(CATTCCG)n	3
(CCAGCTA)n	3
(CCATATT)n	3
(CCATCCA)n	3
(CCGGAGT)n	3
(CCGGT)n	3
(CGGCATT)n	3
(CTAACT)n	3
(CTAGCC)n	3
(CTCCGTA)n	3
(CTCCTAG)n	3
(CTCGACGCGA)n	3
(CTTTATA)n	3
(GAAATG)n	3
(GAAATGCT)n	3
(GAAGACA)n	3
(GAAGACC)n	3
(GAAGCCA)n	3
(GAGAGT)n	3
(GATACATA)n	3
(GATAT)n	3
(GATGGGG)n	3
(GATGTCT)n	3
(GCAGGAA)n	3
(GCCCATT)n	3
(GGATCGA)n	3
(GGGTGGT)n	3
(GGTTGTTC)n	3
(GTCTATAT)n	3
(GTGGACG)n	3
(GTGTCTGT)n	3
(GTTCTGT)n	3
(TAATCAT)n	3
(TACCAGC)n	3
(TATTTTC)n	3
(TCAAGGT)n	3
(TCCCCCA)n	3
(TCCTGTCG)n	3
(TCTTGTT)n	3
(TGAACACT)n	3
(TGAAGCC)n	3
(TGGGAAG)n	3
(TGGGAG)n	3
(TGGGCC)n	3
(TGTAAG)n	3
(TGTACAGT)n	3
(TTCAAC)n	3
(TTCATTG)n	3
(TTCCCAG)n	3
(TTCTTGT)n	3
(TTGTATC)n	3
(TTTAGATA)n	3
(TTTTCAT)n	3
(TTTTCGA)n	3
BEL-11_DWil-I	3
BEL-12_DTa-I	3
BEL-19_DAn-I	3
Copia-1_DSe-LTR	3
DOC2_DM	3
Gypsy-1_DG-I	3
Gypsy-63_DWil-I	3
Gypsy9-I_Dpse	3
Helitron-5_DRh	3
Jockey-2_DK	3
Mariner-7_DEl	3
Transib-10_DAn	3
hAT-2_DRh	3
Gypsy-14_DBi-I	2.99
Gypsy-5_DEr-LTR	2.99
Helitron-2_DVir	2.99
(ATATAC)n	2.98
(ATTAATA)n	2.98
(GATTT)n	2.98
DOC	2.98
DOC4_DM	2.98
I-3_DBi	2.98
IDEFIX_LTR	2.98
Transib-7_DRh	2.98
hAT-1_DSi	2.98
(AAAAAC)n	2.97
(AGAGAC)n	2.97
(ATACAT)n	2.97
(TATATTT)n	2.97
(TTATATT)n	2.97
Gypsy9_I-int	2.97
(AAGACG)n	2.96
(TGCGAA)n	2.96
Gypsy3_I-int	2.96
BURDOCK_I-int	2.95
(AAACT)n	2.94
(CTTTTC)n	2.94
(GCTA)n	2.94
(GTTTGTT)n	2.94
(TGTGAC)n	2.94
Gypsy-26_DPse-I	2.94
Gypsy-34_DEl-I	2.94
TRANSIB3	2.94
(TTAGCA)n	2.93
FW2_DM	2.93
Gypsy-29_DYa-I	2.93
Helitron-N1_DEl	2.93
(AGTTGCC)n	2.92
(GATAG)n	2.92
(GGATATG)n	2.92
(GGCATTT)n	2.92
(TCCTCT)n	2.92
(TGACGC)n	2.92
(TGTAATC)n	2.92
(TTATCGG)n	2.92
BEL-2_DBi-I	2.92
DNA8-1_DEl	2.92
Gypsy-31_DYa-I	2.92
Gypsy6-I_Dpse	2.92
Polinton-1_DGr	2.92
QUASIMODO2-LTR_DM	2.92
UVIR_DV	2.92
(AATTAA)n	2.91
(GGACATC)n	2.91
(GTGCTC)n	2.91
(TATATC)n	2.91
(TTGATA)n	2.91
DNAREP2_DSim	2.91
(ATATAAT)n	2.9
(GCACTGG)n	2.9
(GCGAAGA)n	2.9
(TACCATG)n	2.9
(TATATA)n	2.9
FW3_DM	2.9
Gypsy-23_DY-I	2.9
Gypsy-31_DWil-I	2.9
Gypsy20-I_Dpse	2.9
Helitron-1_DEu	2.9
(ATAC)n	2.89
(ATTGC)n	2.89
(CATTA)n	2.89
BEL-3_DPer-I	2.89
(AAGCTG)n	2.88
(ACACCCT)n	2.88
(ATTAAGT)n	2.88
(GGACA)n	2.88
(TTTCTTA)n	2.88
(TTTGGAT)n	2.88
BEL-5_DYa-I	2.88
Bica_I-int	2.88
Gypsy-13_DEl-I	2.88
I-3_DEu	2.88
(TCTGGT)n	2.87
HeT-A3_DVi	2.87
(AACTCTG)n	2.86
(ACGAGT)n	2.86
(ACGATA)n	2.86
(AGTGGAA)n	2.86
(ATAAGAA)n	2.86
(ATGAGT)n	2.86
(ATTAACA)n	2.86
(CATCATT)n	2.86
(CATG)n	2.86
(CTTTCGT)n	2.86
(TAAGATT)n	2.86
(TCATTTT)n	2.86
(TTCTCT)n	2.86
(TTTGCTA)n	2.86
(TTTTTGCACA)n	2.86
BEL-8_DPe-I	2.86
Gypsy-5_DPer-I	2.86
Gypsy16-I_Dya	2.86
Homo8	2.86
(AATCAA)n	2.85
(ATTCGA)n	2.85
(CAACTA)n	2.85
(CTTTCTC)n	2.85
DM297_LTR	2.85
Gypsy15-I_Dya	2.85
(TTTCTAT)n	2.84
Helitron-N1_DBi	2.84
M4DM	2.84
Mariner-15_DK	2.84
Mariner-7_DYa	2.84
(AGATACT)n	2.83
(CAGAACG)n	2.83
(CATAT)n	2.83
(CATCTC)n	2.83
(CATTTAG)n	2.83
(CCCACTTG)n	2.83
(CCTGAT)n	2.83
(CCTGGTC)n	2.83
(CTTGGCT)n	2.83
(GAATGC)n	2.83
(GAGCAA)n	2.83
(TATACAT)n	2.83
(TATATGA)n	2.83
(TGCCGT)n	2.83
(TTTTGGTA)n	2.83
BLOOD_I-int	2.83
CR1-1_DF	2.83
Gypsy-2_DSim-I	2.83
(AATAA)n	2.82
(ACGAAT)n	2.82
(ACTGTA)n	2.82
(ATGGAA)n	2.82
(CATCA)n	2.82
(GGTCCTC)n	2.82
(TACATTT)n	2.82
Helitron-1_DYak	2.82
Hoyak2	2.82
Invader1_LTR	2.82
Transib-3_DF	2.82
(TAATG)n	2.81
(TATATGTA)n	2.81
I-6_DF	2.81
(AACGAG)n	2.8
(ATAGAAT)n	2.8
(ATGCCA)n	2.8
(CAAATGG)n	2.8
(CATCTAC)n	2.8
(CCAGGCTAGA)n	2.8
(GAACATT)n	2.8
(GAATATT)n	2.8
(GGGAATCCG)n	2.8
(GTTGCAC)n	2.8
(TAATGGT)n	2.8
(TCAGCGA)n	2.8
(TCGGGAA)n	2.8
(TCTTCGT)n	2.8
(TGAAGTT)n	2.8
(TGAGAC)n	2.8
(TTAAT)n	2.8
(TTTTGTATG)n	2.8
CR1-1_DK	2.8
Copia_I-int	2.8
Gypsy-1_DSim-I	2.8
P-1_DY	2.8
(ATGTAT)n	2.79
(GAAGAT)n	2.79
(TCCACT)n	2.79
(TTATGT)n	2.79
(TTCA)n	2.79
BEL-4_DFi-I	2.79
Gypsy20-I_Dya	2.79
STALKER4_I-int	2.79
(AAAT)n	2.78
(AATCTA)n	2.78
(AATGAAATG)n	2.78
(ATGTG)n	2.78
(TCAGAA)n	2.78
(TCCTT)n	2.78
Copia-2_DPer-I	2.78
Copia2_I-int	2.78
Gypsy-2_DEl-I	2.78
Jockey-9_DF	2.78
(AAATCG)n	2.77
(AATAAT)n	2.77
(CTGGCA)n	2.77
(GAATTG)n	2.77
(TATATG)n	2.77
(TCGGCCT)n	2.77
(TGGGGA)n	2.77
(TTACCT)n	2.77
Gypsy5_I-int	2.77
Outcast-1_DEl	2.77
dmel_rDNA_ETS	2.77
(AAAGA)n	2.76
(AATTCC)n	2.76
(CACTGAT)n	2.76
(CCAGAAT)n	2.76
(CTTCTC)n	2.76
(GAGTTT)n	2.76
(TATTAT)n	2.76
BEL-1_DWil-I	2.76
Gypsy-37_DEl-I	2.76
Gypsy16-LTR_Dya	2.76
I-7_DBi	2.76
MDG3_LTR	2.76
Mariner-15_DF	2.76
TV1I	2.76
(ACACATA)n	2.75
(ATGATGA)n	2.75
(CAATAT)n	2.75
(CCTTCTT)n	2.75
(CGGTTAA)n	2.75
(CTACTA)n	2.75
(CTAT)n	2.75
(GAAG)n	2.75
(GAGATAC)n	2.75
(GCCACAT)n	2.75
(GGTAGG)n	2.75
(GTGGTTG)n	2.75
(TAACATTA)n	2.75
(TAATA)n	2.75
(TCGCAAC)n	2.75
(TGGAAA)n	2.75
(TTAGGTT)n	2.75
(TTGAGA)n	2.75
Copia_LTR	2.75
(CCTCTC)n	2.74
(GTATGT)n	2.74
(TTTGCTT)n	2.74
Helitron-N2_DBi	2.74
Mariner-1_DF	2.74
(AAATG)n	2.73
(ACTGCT)n	2.73
(ATATGAG)n	2.73
(ATCCTT)n	2.73
(CAATG)n	2.73
(CTGTCTT)n	2.73
(GATAAT)n	2.73
(GTAGTT)n	2.73
(TTCTTG)n	2.73
(AACATC)n	2.72
(AACTGG)n	2.72
(ACTGCAT)n	2.72
(ATAACA)n	2.72
(ATCAGA)n	2.72
(ATGGG)n	2.72
(GATCCCC)n	2.72
(TATAG)n	2.72
Gypsy11-LTR_Dya	2.72
ROO_I-int	2.72
hAT-2_DF	2.72
[truncated: 7,920 more rows]

## Sheet: replicate 3
Figure 2-source data 3. Rhino ChIP-seq enrichment scores for all repeats in the genome. Data from (Mohn, et al. 2014; Zhang, et al. 2014; Parhad, et al. 2017).
#repeat	#chip/input(RPM)
(AGAATAACAT)n	457
(ATAACATAGA)n	240
piRNA_cluster_42AB	48.92
(GGAGA)n	46.52
(ACATAGAATA)n	39.53
(CGGATAG)n	35.32
(GAGGA)n	35.29
Copia-3_DBp-I	35.16
(TCTCC)n	32.53
(GCATCG)n	31.11
Gypsy-5_DKi-LTR	28.74
Gypsy-2_DRh-LTR	24.9
Invader6_LTR	24.21
(CTCCAA)n	22.77
Invader6_I-int	22.55
Gypsy-8_DFi-I	22.51
(TAAAG)n	22.18
NOF_FB	21.86
(ATTCTGAA)n	20.64
Rehavkus-1_DY	20.52
Copia-1_DSe-I	19.12
piRNA_cluster_80F	18.86
TART-A	18.52
(TATTCTATGT)n	18.1
(TACACAT)n	17.97
HETA_DSi	17.84
Gypsy8_I-int	17.38
(TATTAAT)n	17.03
Gypsy-19_DTa-I	16.57
R1_DSi	16.46
TART_B1	16.45
HETRP_DM	15.73
Gypsy-7_DSe-LTR	15.72
Gypsy-7_DSe-I	14.96
HETA	14.96
(ATCTT)n	14.82
NINJA_I-int	14.81
(CATAGAA)n	14.17
(CCCCCAT)n	14.03
(ATAGAATAAC)n	13.68
(TTACT)n	13.58
(ATATACAGT)n	13.42
Copia-1_DBi-I	13.42
Gypsy-3_DGri-I	13.39
(CAATGTT)n	13.35
DM1731_I-int	13.29
Gypsy-13_DSim-I	13.29
R1-1_DSi	13.26
Copia-7_DAn-I	13
(TTGCCTT)n	12.92
(CTGTGTGGT)n	12.91
(CTTACA)n	12.83
MAX_I-int	12.78
TAHRE	12.2
(CTCATA)n	12.09
BEL-5_DYa-LTR	12
Gypsy-3_DSe-I	11.56
R1_DSe	11.35
Copia-1_DSe-LTR	11.29
(ATAG)n	11.28
(AATAATG)n	11.25
DMRT1B	11.18
DMRT1A	11.15
R1-1_DYa	10.97
dsech_rDNA_ETS	10.94
Gypsy-23_DYa-I	10.79
(CATAGAATAA)n	10.78
Copia-1_DFi-I	10.73
(TTATTCTATG)n	10.7
(TTCTATGTTA)n	10.4
Gypsy-41_DAn-I	10.37
Gypsy12_LTR	10.07
(ACGGAGT)n	10.02
(TTATTC)n	10
(TTCATTTCA)n	9.96
(TAGTAATT)n	9.91
(TGTTATTCTA)n	9.82
BATUMI_I-int	9.77
G6_DM	9.54
G_DM	9.45
MuDR-1_DT	9.4
(TTCTGTG)n	9.35
(TAACAAT)n	9.3
(CTTCCC)n	9.26
(ATCCCCC)n	9.17
MAX_LTR	9.16
LOOPER1_DM	9.14
(TTATTAC)n	9.11
(CCGGACC)n	9.09
(ATATATAA)n	9
BS	8.93
(GAGAA)n	8.92
(CATTGAA)n	8.88
Gypsy13-I_Dpse	8.88
(GGGCAATGG)n	8.79
Gypsy-14_DFi-I	8.7
Mariner-6_DBi	8.67
BEL-21_DTa-LTR	8.64
DM1731_LTR	8.6
(GAAGA)n	8.56
DMRT1C	8.56
(GGGACG)n	8.53
(ATTCAAT)n	8.5
(ATACATACAT)n	8.49
(TTAT)n	8.48
Copia-1_DSim-LTR	8.44
NINJA_LTR	8.42
(GATA)n	8.35
Gypsy-7_DEl-I	8.26
(TCTTA)n	8.23
cen_Y_island	8.2
(AACTTT)n	8.11
(ACAGACCAG)n	8.11
R1-5_DYa	8.04
(AATTTAAGA)n	8
(ATAAATA)n	8
I-6_DBp	8
R1-2_DTa	7.93
Gypsy8_LTR	7.92
(TAGACAA)n	7.87
hAT-2_DSe	7.75
(TAGAATAACA)n	7.7
(ATGTTATTCT)n	7.65
(AAATGTAC)n	7.6
Jockey-1_DSe	7.58
BEL-22_DTa-I	7.57
Copia-1_DSim-I	7.55
BATUMI_LTR	7.54
CIRCE	7.51
Gypsy-19_DEl-I	7.5
(GAAGAG)n	7.42
Gypsy-2_DAn-I	7.41
1pt688.Contig101_locus	7.39
Copia1-I_DM	7.37
R1_DM	7.37
MICROPIA_I-int	7.29
Gypsy-13_DRh-I	7.18
BS2	7.16
ROOA_I-int	7.16
(AAAGT)n	7.11
Gypsy-26_DEl-I	7.09
(ATTATAA)n	7.08
(CAACA)n	7.03
Jockey-1_DYa	7
(TACATATATA)n	6.98
R1_DEr	6.98
Jockey-3_DM	6.89
Homo1	6.88
(ATT)n	6.85
Transib-6_DAn	6.84
(TAACATAGAA)n	6.82
(GCACAGA)n	6.79
piRNA_cluster_38C1	6.75
BEL-4_DEu-I	6.73
(GATAA)n	6.69
(ACTCCAT)n	6.68
(AAGAT)n	6.62
MICROPIA_LTR	6.62
Gypsy13-I_Dya	6.61
(AATAATAC)n	6.52
Copia1-LTR_DM	6.51
(GAGATGA)n	6.5
(TAACATTA)n	6.5
Gypsy-21_DWil-I	6.5
Gypsy-25_DYa-I	6.5
Jockey-3_DSim	6.5
(CTACA)n	6.47
(TTGTCTATT)n	6.46
dsim_rDNA_28S_rDNA	6.45
Gypsy12_I-int	6.44
(TTAGATA)n	6.43
(CCTCTT)n	6.42
(ACATGACATT)n	6.4
1pt688.3L_locus	6.39
Gypsy-10_DMoj-LTR	6.27
Gypsy5-I_Dpse	6.25
Mariner-6_DRh	6.25
R1-4_DYa	6.21
TRANSIB1	6.18
(ATAGGT)n	6.17
Gypsy-6_DSim-LTR	6.16
(CCTTTTAG)n	6.11
Gypsy-22_DYa-I	6.11
BEL-4_DRh-I	6.1
(CTATGTTATT)n	6.03
(TATATATAAA)n	6
Jockey-2_DSim	6
Chimpo_I-int	5.96
R1-2_DYa	5.96
(TACAATT)n	5.94
BEL-5_DEl-I	5.94
(AGAAAG)n	5.9
(TCTATTG)n	5.89
Gypsy-30_DWil-I	5.84
(ATTTAGTA)n	5.83
(TGCTTAT)n	5.83
Gypsy-3_DBi-LTR	5.83
hAT-5N1_DK	5.83
piRNA_cluster_38C2	5.81
Gypsy-8_DVir-I	5.8
(TATAATAA)n	5.75
Gypsy-11_DBp-I	5.74
BEL-8_DMo-I	5.72
Gypsy-13_DSim-LTR	5.72
Invader1_I-int	5.72
(TACTGTA)n	5.67
(ATAAGAA)n	5.63
Gypsy-4_DEl-I	5.6
(ATCTTTT)n	5.58
(CGGCTC)n	5.58
(TCAATGT)n	5.57
(ATACTT)n	5.56
(ATCTATA)n	5.56
Jockey-12_DAn	5.56
(ACATTTAC)n	5.5
(TACAGCA)n	5.5
Gypsy13-LTR_Dya	5.5
Gypsy5_LTR	5.49
Transib-4_DBp	5.48
dsim_rDNA_ITS1	5.48
(ACTAAT)n	5.47
(GGGAGC)n	5.47
Mariner-4_DBp	5.47
(ATATCA)n	5.46
Gypsy-9_DFi-I	5.45
(GTAACTA)n	5.44
(TCTAT)n	5.44
Bica_LTR	5.44
Baggins1	5.41
(TCTCCGC)n	5.36
CR1-5_DRh	5.35
(ACCACACAG)n	5.33
(AATTATG)n	5.32
Gypsy-6_DPer-I	5.32
CR1-1_DF	5.31
Gypsy-4_DSe-I	5.31
Gypsy-24_DY-I	5.27
Gypsy-3_DKi-I	5.27
(TTACTCT)n	5.24
(GAATTAT)n	5.23
Gypsy-17_DRh-I	5.23
Gypsy-26_DYa-I	5.23
(ATATACA)n	5.2
(CCGCCT)n	5.2
(ACTTTAT)n	5.16
(ATATAATA)n	5.14
BEL2-I_Dmoj	5.14
Gypsy-52_DEl-I	5.14
(TCAATTA)n	5.11
(GTATGAT)n	5.1
(GTCTATA)n	5.08
(TAGATG)n	5.08
Gypsy-25_DEl-I	5.08
(AGCGCC)n	5.07
(CATAATG)n	5.07
(GTTCTTT)n	5.07
Gypsy-6_DGri-I	5.07
(ATCTATAT)n	5.06
hAT-2_DK	5.04
Jockey-2_DBp	5.03
(AAGTATAT)n	5
(AATAATTA)n	5
EnSpm-1_DF	5
(GTCGAT)n	4.96
(AGAGG)n	4.95
(TTACCTT)n	4.94
Gypsy22-I_Dpse	4.93
(ACTAA)n	4.92
Jockey-8_DEu	4.91
cen_4_island	4.91
Gypsy-8_DRh-I	4.9
Gypsy-15_DBp-I	4.88
(TACAA)n	4.87
Invader4_I-int	4.87
(GTAATAA)n	4.86
Jockey-13_DBp	4.86
(TTAGTAA)n	4.85
Transib-6_DRh	4.85
Gypsy-12_DRh-LTR	4.83
(TAATGAT)n	4.82
(TTTAGG)n	4.81
Gypsy-20_DEl-I	4.81
Gypsy-20_DBp-I	4.8
(ACTATTT)n	4.79
(TATAAA)n	4.79
(AATGAAATG)n	4.78
(AATTCTA)n	4.76
TC1-2_DM	4.76
Gypsy-2_DSe-I	4.74
(AATAGTT)n	4.73
(GCTTAA)n	4.73
(ACAAT)n	4.72
(CCATT)n	4.72
Gypsy-6_DSe-LTR	4.72
(TATATTGA)n	4.71
Jockey-3_DBp	4.71
(TATATTC)n	4.7
DOC6_DM	4.67
Invader3_I-int	4.67
(ACAATAG)n	4.66
(TCTTATA)n	4.65
(AATAATA)n	4.63
Gypsy-7_DSim-I	4.63
(CCGTTA)n	4.62
Gypsy-4_DSim-I	4.62
(AATATAAT)n	4.6
(TGATT)n	4.6
Jockey-6_DEu	4.6
Jockey-1_DSi	4.59
(ACTCTAGTA)n	4.58
Gypsy2-I_DV	4.58
Transib-6_DBp	4.57
(AGTATT)n	4.56
(CCGTCC)n	4.56
(CTATAACA)n	4.56
(ATTCTG)n	4.55
(CGGGG)n	4.55
Jockey-2_DAn	4.55
Gypsy-16_DRh-I	4.54
(TATGTAT)n	4.52
Chimpo_LTR	4.51
(AATTTGT)n	4.5
(ATATC)n	4.5
(ATTTCAT)n	4.5
(TATACTTT)n	4.5
Invader4_LTR	4.5
(CATATATA)n	4.48
HOBO	4.46
DIVER2_I-int	4.45
Gypsy5-I_Dya	4.44
Gypsy-20_DAn-I	4.43
Gypsy-25_DAn-I	4.43
(TATGAC)n	4.42
Gypsy-7_DWil-LTR	4.42
(AACTAGA)n	4.41
(TTATATAT)n	4.41
BEL-2_DSe-I	4.41
BEL-6_DYa-I	4.41
Chouto_I-int	4.41
Gypsy-6_DSe-I	4.41
TABOR_DA-I	4.4
hAT-2_DRh	4.36
(CATTA)n	4.34
(TATTCTA)n	4.33
(TTACTTG)n	4.33
Gypsy-8_DSim-I	4.33
Gypsy14-I_Dpse	4.33
(TTATGATA)n	4.32
(CAATAC)n	4.3
(CTAAG)n	4.3
(GGTATA)n	4.3
Gypsy-24_DYa-I	4.3
Invader1_LTR	4.3
(TAATTGA)n	4.29
(TCTAGTA)n	4.29
Transib5	4.29
Gypsy17-I_Dpse	4.28
(CACATG)n	4.27
(TACATATA)n	4.27
(ATTACAT)n	4.25
(GTACATAT)n	4.25
(TGTATAC)n	4.25
(TAT)n	4.24
(TATGTTTA)n	4.24
(TGTTTATA)n	4.22
BEL-4_DBi-I	4.22
BEL-4_DBp-I	4.21
(AATGATC)n	4.2
(ATTAGTA)n	4.2
(ATTTTAG)n	4.2
(CCCCCAACTG)n	4.19
Jockey2	4.19
Gypsy6A_LTR	4.18
(TGGTTTA)n	4.17
Gypsy-9_DSim-LTR	4.17
R2_DSi	4.17
Gypsy-35_DEl-I	4.16
G4_DM	4.15
Gypsy-4_DSim-LTR	4.15
(AATTTTA)n	4.14
(ACTCGC)n	4.14
R2_DM	4.14
(AAAATACG)n	4.13
(TCCAATT)n	4.12
Invader3_LTR	4.12
ACCORD_LTR	4.11
(ATTATATT)n	4.1
(TTCATTG)n	4.1
(ATATTATAT)n	4.09
(ATACATT)n	4.08
(TTTATCA)n	4.08
R2B_DM	4.08
BS3_DM	4.07
(CTTGTCATGT)n	4.06
Gypsy6_I-int	4.06
Jockey-12_DBp	4.06
(CAAGTTG)n	4.05
Gypsy6_LTR	4.05
(TATTGA)n	4.03
Gypsy_LTR	4.03
Mariner-11_DF	4.03
DMCR1A	4.02
Gypsy-7_DEl-LTR	4.02
(AACATAT)n	4
(AATATCT)n	4
(AATTATAG)n	4
(ATATTGA)n	4
(ATATTTAT)n	4
ACCORD_I-int	4
BEL-2_DSe-LTR	4
Gypsy-53_DEl-I	4
Jockey-1_DAn	4
(CCCCATT)n	3.99
ACCORD2_LTR	3.99
G5_DM	3.99
(ATAC)n	3.97
(TAAGTT)n	3.95
(TATTGTT)n	3.95
(TTCATTA)n	3.95
1pt688.Contig9_locus	3.95
Gypsy-5_DWil-I	3.95
Gypsy-8_DBi-I	3.95
Gypsy1-I_Dya	3.95
Copia1-I_Dpse	3.94
Gypsy-31_DEl-LTR	3.94
hAT-2_DY	3.94
(GTAAGAA)n	3.93
Gypsy-3_DBi-I	3.93
Gypsy1-I_DM	3.93
(ATTCTAA)n	3.92
(TACAT)n	3.92
(TACCATG)n	3.92
Copia2_LTR_DM	3.92
(GATGTATG)n	3.91
(TTAACT)n	3.89
(ATAATAAT)n	3.88
BEL-2_DBp-I	3.88
(CGGTG)n	3.86
Gypsy-26_DBp-I	3.86
Jockey-4_DEu	3.86
(AAGTTT)n	3.85
(GAGACA)n	3.85
(TACTTAA)n	3.85
BEL-13_DP-I	3.85
Copia-2_DYa-I	3.85
Mariner-2_DT	3.85
PROTOP	3.85
(ATAATGA)n	3.84
(GTCTCC)n	3.83
(GTTATA)n	3.83
(TCATAATG)n	3.83
Gypsy-2_DSe-LTR	3.83
(AAATTA)n	3.82
Helitron-N2_DBp	3.82
dmel_rDNA_ETS	3.82
(ATGCA)n	3.81
(TATATAT)n	3.81
Gypsy-27_DYa-LTR	3.81
(ACAATAA)n	3.8
(ATACAAT)n	3.8
(GAATA)n	3.8
(TTAACAT)n	3.8
R1-2_DM	3.8
Gypsy-26_DYa-LTR	3.78
R1-3_DYa	3.78
Gypsy-10_DSim-I	3.77
(AATTAAG)n	3.75
(TATAAG)n	3.75
DIVER2_LTR	3.75
Gypsy-13_DAn-I	3.75
Gypsy15-LTR_Dya	3.75
(TAAGTAG)n	3.74
ROVER-LTR_DM	3.74
(ATAACAG)n	3.72
(TTAAAA)n	3.72
Mariner-13_DF	3.72
Mariner-24_DF	3.72
(CCTCC)n	3.71
(TGTATTG)n	3.71
Gypsy-34_DEl-I	3.71
Gypsy_6B	3.71
Helitron-2N1_DVir	3.71
Jockey-3_DF	3.71
(TATTCAT)n	3.7
CR1-2_DK	3.7
Gypsy-15_DEl-I	3.7
(CGTTTTG)n	3.69
(TAATTG)n	3.69
Gypsy-10_DWil-I	3.69
Jockey-3_DVi	3.69
STALKER4_I-int	3.69
(GTCTGTCC)n	3.68
(TAATATG)n	3.68
Gypsy-12_DSim-I	3.68
Gypsy-37_DAn-I	3.68
(TACCTT)n	3.67
(TGTTATC)n	3.67
P-1_DY	3.67
BEL-1_DBp-I	3.66
(ATTCTTT)n	3.65
(TTTCATT)n	3.65
Gypsy-10_DMoj-I	3.64
(ATACGAT)n	3.63
(GATTTAA)n	3.63
(TAGCATAA)n	3.63
Gypsy-11_DEl-I	3.63
(ATATTAAT)n	3.62
(TATAGTT)n	3.62
(TTTGTTA)n	3.62
BEL-2_DAn-I	3.62
R1-9_DWi	3.62
(CATATAA)n	3.61
(CTATAA)n	3.61
(TAAAAA)n	3.61
BEL-4_DEl-LTR	3.61
TRANSIB2	3.61
dmel_rDNA_ITS2	3.61
G7_DM	3.6
Gypsy-38_DAn-I	3.6
(AATAGAATGG)n	3.59
(AGGTC)n	3.59
(TTATCTTA)n	3.59
Copia_I-int	3.59
Gypsy-2_DBp-I	3.59
Gypsy5-LTR_Dya	3.59
ROO_LTR	3.59
(AATACTT)n	3.57
(AATTAAC)n	3.57
Gypsy11_I-int	3.57
(TGAAGT)n	3.56
(TTCTA)n	3.56
Copia-2_DYa-LTR	3.56
DNA3-1_DF	3.56
Jockey-15_DBp	3.56
(ATAGCTT)n	3.55
Gypsy20-LTR_Dya	3.55
BEL-5_DAn-I	3.54
DOC3_DM	3.54
Gypsy-27_DYa-I	3.54
(ACCAGACAG)n	3.53
(AATAAAC)n	3.52
(ATACCAT)n	3.52
(ATTTACT)n	3.52
(GTTTTTA)n	3.52
(TTATGTT)n	3.52
Polinton-1_DY	3.52
(TGCAGG)n	3.51
Helena_Ds	3.51
(AGTTA)n	3.5
(ATAAATT)n	3.5
(ATAACGT)n	3.5
(ATTATA)n	3.5
(CTACAT)n	3.5
(TAACG)n	3.5
(TATT)n	3.5
Gypsy1-I_Dmoj	3.5
TIRANT_LTR	3.5
(AGAGA)n	3.49
(ATGCAAT)n	3.49
(TTATTAA)n	3.49
Gypsy2-I_DM	3.49
(AGTATAGTAC)n	3.48
(ATAAACT)n	3.47
BEL-17_DEl-I	3.47
S_DM	3.47
TRANSIB4	3.47
(ATCAAC)n	3.46
Gypsy-11_DSim-I	3.46
Helitron1_DM	3.46
(AATATTG)n	3.45
(AATCTT)n	3.45
(AGAGTG)n	3.45
(AGTGTAT)n	3.45
(ATATTTAC)n	3.45
Copia_LTR	3.45
Mariner-8_DBp	3.45
(ATAGTA)n	3.44
(CTTATC)n	3.44
dsim_rDNA_18S_rDNA	3.44
(AGATTA)n	3.43
(GTTTCATA)n	3.43
(TACTGA)n	3.43
(TGAATACA)n	3.43
(TTAAAAA)n	3.43
PROTOP_B	3.43
TLD2	3.43
(AAACAT)n	3.42
(ATTCAT)n	3.42
(TAATCTA)n	3.42
BEL-11_DEl-I	3.42
(AACAACT)n	3.41
(AATTTCA)n	3.41
(ACTTTA)n	3.41
(CCCCATGAA)n	3.41
G3_DM	3.41
Gypsy-24_DBp-I	3.41
ROOA_LTR	3.41
(ATGTGTG)n	3.4
(TCTTTAT)n	3.4
Gypsy-3_DRh-I	3.4
(ATAGATA)n	3.39
(TAATTAA)n	3.39
DMTOM1_LTR	3.39
Transib-6_DBi	3.39
(AAACTT)n	3.38
(AGATTTT)n	3.38
(ATATTGAT)n	3.38
(CTTTTAT)n	3.38
(TATAAGT)n	3.38
(TTTGCTC)n	3.38
BEL-6_DRh-I	3.38
Gypsy-9_DEl-I	3.38
(GAACGGA)n	3.37
(TATTATT)n	3.37
(TGCATAC)n	3.37
Gypsy-1_DAn-I	3.37
(ATAGAAT)n	3.36
(TAGTATA)n	3.36
(TATCAA)n	3.36
(TTATTAG)n	3.36
(AATCAT)n	3.35
(TATATTTA)n	3.35
IVK_DM	3.35
Jockey-4_DSim	3.34
(ATAATAATC)n	3.33
(ATTCATA)n	3.33
(CTATAAT)n	3.33
Mariner-15_DF	3.33
QUASIMODO_I-int	3.33
hAT-1_DAn	3.33
(AAGTT)n	3.32
(AATAGAC)n	3.32
(CTATTAC)n	3.32
(TGCTAC)n	3.32
BEL-17_DTa-I	3.32
Gypsy-11_DTa-LTR	3.32
(AACAC)n	3.31
(CATTTAA)n	3.31
(TTATGT)n	3.31
Gypsy-21_DEl-LTR	3.31
dmau_rDNA_ETS	3.31
(GATATA)n	3.3
(GCAA)n	3.3
(TAATAAG)n	3.3
(TAGATAAT)n	3.3
(TTAGTCAAT)n	3.3
ACCORD2_I-int	3.3
BARI_DM	3.3
BEL-14_DEl-I	3.3
BEL-3_DYa-I	3.3
MuDR-1_DF	3.3
QUASIMODO2-I_DM	3.3
Rsp_SAT	3.3
(CGGCAG)n	3.29
Invader2_LTR	3.29
Jockey-1_DEr	3.29
(TAACTA)n	3.28
BEL-3_DPer-I	3.28
Gypsy-5_DSim-I	3.28
(ATTTAAT)n	3.27
(TACATG)n	3.27
BEL-3_DWil-I	3.27
Copia-2_DTa-I	3.27
Gypsy-24_DWil-I	3.27
Jockey-10_DBp	3.27
NOMAD_LTR	3.27
R1-5_DK	3.27
(GCCATG)n	3.26
BURDOCK_I-int	3.26
Gypsy-8_DSe-I	3.26
PARISa_DPe	3.26
(ATTAAGT)n	3.25
Homo8	3.25
hAT-1_DSi	3.25
(AACTACA)n	3.24
(ATATTAT)n	3.24
(GATAAT)n	3.24
(TATACAA)n	3.24
M4DM	3.24
(AAGCT)n	3.23
(ATACTA)n	3.23
GTWIN_I-int	3.23
Gypsy-17_DTa-I	3.23
Gypsy20-I_Dya	3.23
(CAGCTCG)n	3.22
(CTAATAT)n	3.22
(TATCT)n	3.22
Gypsy-18_DEl-I	3.22
Helitron-N1_DBp	3.22
Transib-8_DAn	3.22
(ATTTCTT)n	3.21
Gypsy-1_DVir-I	3.21
Gypsy-2_DSim-I	3.21
(TATGGAT)n	3.2
(TTAATAC)n	3.2
(TTGAATA)n	3.2
QUASIMODO2-LTR_DM	3.2
(GAGAGG)n	3.19
(ATAAGTAA)n	3.18
(GATATAAA)n	3.18
(TATAATT)n	3.18
(TATATATT)n	3.18
(TATATCAA)n	3.18
BEL-5_DFi-I	3.18
(AGAAAT)n	3.17
(ATAGTAA)n	3.17
(TGAATA)n	3.17
(TTCTTGTT)n	3.17
Copia-1_DBp-I	3.17
Gypsy-11_DFi-I	3.17
Gypsy-27_DWil-I	3.17
Gypsy-2_DRh-I	3.17
Gypsy11_LTR	3.17
(ACATGAA)n	3.16
(AGTAAC)n	3.16
(ATCATAT)n	3.16
(TTCTC)n	3.16
NTS_DM	3.16
piggyBac-3_DAn	3.16
(ACAGTAT)n	3.15
(ACATTAA)n	3.15
(AGATTT)n	3.15
(TTTCGTG)n	3.15
Gypsy-1_DSim-I	3.15
(AATAC)n	3.14
(AATTAA)n	3.14
(CTACCTCG)n	3.14
(CTTTTTA)n	3.14
(TATATATG)n	3.14
PROTOP_A	3.14
(ATAACTTA)n	3.13
Jockey-6_DRh	3.13
(ACATACAA)n	3.12
(ATATTTG)n	3.12
(ATCTTAT)n	3.12
(CTAATCG)n	3.12
(CTTCTCG)n	3.12
(TAGATTA)n	3.12
(TTGTA)n	3.12
BURDOCK_LTR	3.12
(ATACTGT)n	3.11
(ATATAAC)n	3.11
(ATGAT)n	3.11
(TATTTAA)n	3.11
(TGTCCGTT)n	3.11
DOC5_DM	3.11
Gypsy-2_DWil-I	3.11
Gypsy-52_DWil-I	3.11
Gypsy4_I-int	3.11
Mariner-7_DYa	3.11
(TAACTAC)n	3.1
Gypsy-5_DEr-LTR	3.1
Gypsy-7_DFi-I	3.1
Gypsy_I-int	3.1
I-5_DK	3.1
(TCTCT)n	3.09
(TTAGAGT)n	3.09
Mariner-16_DRh	3.09
Mariner-5_DRh	3.09
(ATGTAG)n	3.08
(AAGTTAT)n	3.07
(TATATGA)n	3.07
(TTATTTG)n	3.07
Gypsy-12_DVir-LTR	3.07
Gypsy4-I_Dya	3.07
(ACATT)n	3.06
(ACATTTT)n	3.06
(AGTTTT)n	3.06
(ATATAAT)n	3.06
(TGTATCTT)n	3.06
(TTACGTT)n	3.06
DM176_LTR	3.06
Gypsy-42_DWil-LTR	3.06
Jockey-2_DRh	3.06
(GGAGCG)n	3.05
(TCCCATC)n	3.05
FW_DM	3.05
Gypsy10-I_Dpse	3.05
(ATTGTA)n	3.04
(TATATTT)n	3.04
Gypsy-60_DWil-I	3.04
(TCTCATC)n	3.03
Gypsy7_I-int	3.03
(GTATA)n	3.02
(TTTACAA)n	3.02
Gypsy3-I_Dpse	3.02
Gypsy5_I-int	3.02
Invader2_I-int	3.02
cen_3_island	3.02
(ATATTA)n	3.01
(ATTAT)n	3.01
BEL-3_DVir-I	3.01
Gypsy-13_DFi-I	3.01
Gypsy-22_DWil-LTR	3.01
Mariner-12_DRh	3.01
(ACTAAGT)n	3
(ATCTAC)n	3
(ATGTAAC)n	3
(ATGTAAT)n	3
(ATGTATT)n	3
(ATTTAATT)n	3
(ATTTCCG)n	3
(CCACCCAAT)n	3
(CTACATT)n	3
(CTCCCAC)n	3
(GAATATA)n	3
(GAGTATA)n	3
(GATTTTA)n	3
(GCCGAG)n	3
(GGATTCCCC)n	3
(GTAATA)n	3
(TAACGAT)n	3
(TCATCAA)n	3
(TGATAC)n	3
(TGATGTT)n	3
BEL-1_DRh-I	3
FW3_DM	3
I-1_DWi	3
Mariner-12_DAn	3
Zator-1_DF	3
(TTATATA)n	2.99
1pt688.2L_2_260bp_locus	2.99
Gypsy-18_DBp-I	2.99
IDEFIX_LTR	2.99
Transib-1_DK	2.99
(ATATG)n	2.98
(CTATT)n	2.98
(TATAATA)n	2.98
Gypsy-28_DYa-LTR	2.98
Gypsy16-I_Dya	2.98
(ATAATGAA)n	2.97
(CATCAA)n	2.97
(CCCAC)n	2.97
(TTATCGG)n	2.97
Copia-5_DAn-I	2.97
Gypsy-2_DBi-I	2.97
Gypsy3_I-int	2.97
Gypsy9_LTR	2.97
I-4_DEu	2.97
Transib1_DP	2.97
(ATTTAT)n	2.96
(GTATCTG)n	2.96
(TATTCAA)n	2.96
Gypsy-4_DBi-I	2.96
Gypsy9_I-int	2.96
(CAATA)n	2.95
(TGTATAT)n	2.95
(TTATACA)n	2.95
BEL-15_DTa-I	2.95
Gypsy-1_DSim-LTR	2.95
Gypsy-8_DEl-I	2.95
Gypsy1-LTR_DM	2.95
TRANSPAC_I-int	2.95
ZAM_LTR	2.95
(AATATATGG)n	2.94
(ACATTAT)n	2.94
(ACCCAGC)n	2.94
(ATCT)n	2.94
(ATTACT)n	2.94
(CTCTACT)n	2.94
(TATTG)n	2.94
(TGGGTGGA)n	2.94
(TTATGTA)n	2.94
DOC4_DM	2.94
Helitron-N1_DAn	2.94
S2_DM	2.94
(ATTTTAC)n	2.93
(GCAGATGCT)n	2.93
(TAATTC)n	2.93
Copia-4_DMoj-I	2.93
Gypsy-1_DG-I	2.93
Gypsy-2_DSim-LTR	2.93
(ATAGTT)n	2.92
(ATCCAAT)n	2.92
(GATTTAT)n	2.92
(TAATAATA)n	2.92
(TGCTATT)n	2.92
(TTTCTTA)n	2.92
BEL-2_DVir-I	2.92
Copia2_I-int	2.92
Harbinger-1N1_DRh	2.92
(AAGATT)n	2.91
(TTAAGA)n	2.91
(TTATC)n	2.91
BLOOD_I-int	2.91
NOMAD_I-int	2.91
(GCCCG)n	2.9
(GGTGCGG)n	2.9
(TTGTTTTT)n	2.9
(TTTTATA)n	2.9
Gypsy8-I_Dya	2.9
STALKER4_LTR	2.9
Uhu_DAn	2.9
(ACAGTA)n	2.89
(CCTCG)n	2.89
(GATATC)n	2.89
(TTACATA)n	2.89
Gypsy-18_DAn-I	2.89
Gypsy2_I-int	2.89
Jockey-7_DAn	2.89
Jockey-9_DF	2.89
TRANSIB3	2.89
(AACAT)n	2.88
(AAGGAATA)n	2.88
(AATATG)n	2.88
(ATATT)n	2.88
(GGATACA)n	2.88
(GTGCA)n	2.88
(TTACTA)n	2.88
(TTTAAC)n	2.88
(TTTAACA)n	2.88
(TTTAGATA)n	2.88
Gypsy-15_DAn-I	2.88
Gypsy-24_DAn-I	2.88
Jockey-8_DRh	2.88
MDG3_I-int	2.88
(AATTCTC)n	2.87
(AGAGAAG)n	2.87
(ATTAC)n	2.87
(CGCCCCT)n	2.87
(GGTCGCT)n	2.87
(GTTTAA)n	2.87
(TAATTA)n	2.87
Jockey-6_DVi	2.87
ROVER-I_DM	2.87
(AATGATA)n	2.86
(AGATT)n	2.86
(ATTATTC)n	2.86
(CTATAG)n	2.86
(GAAAGT)n	2.86
(GCAAAAT)n	2.86
(GTATAAT)n	2.86
(GTGGAGC)n	2.86
(TTTGCGC)n	2.86
Gypsy-45_DWil-I	2.86
(ATATA)n	2.85
(ATCCTTC)n	2.85
(TATCC)n	2.85
Hoana1	2.85
Mariner-9_DRh	2.85
Outcast-1_DBi	2.85
ROO_I-int	2.85
piggyBac-1_DEu	2.85
(AATAAAT)n	2.84
(ATTATAT)n	2.84
(ATTTTAA)n	2.84
(TAATCT)n	2.84
(TAGCTGA)n	2.84
(TATTAAG)n	2.84
(TTACCTA)n	2.84
Copia-2_DKi-I	2.84
Gypsy-7_DSim-LTR	2.84
HMSBEAGLE_I-int	2.84
(AGAAG)n	2.83
(ATTATGT)n	2.83
Copia-1_DWil-I	2.83
Gypsy15-I_Dya	2.83
Gypsy3_LTR	2.83
cen_X_island	2.83
(TAATATA)n	2.82
(TATCGTA)n	2.82
(TTAACAA)n	2.82
(TTTACTGT)n	2.82
Gypsy-7_DVir-I	2.82
Jockey-3_DRh	2.82
Jockey-3_DT	2.82
(AATCCTT)n	2.81
(ATACAT)n	2.81
(TATTAG)n	2.81
(TTTTAAT)n	2.81
CR1-2_DEu	2.81
Copia-3_DEu-I	2.81
DOC	2.81
Gypsy-3_DSim-I	2.81
ISFUN1	2.81
TIRANT_I-int	2.81
Transib-2_DRh	2.81
Transib-3_DRh	2.81
(ATATGT)n	2.8
(CAACCAC)n	2.8
(CAGTAT)n	2.8
(CTATTA)n	2.8
(TAAGGT)n	2.8
(TGGGAG)n	2.8
G5A_DM	2.8
Gypsy-31_DYa-I	2.8
Gypsy-6_DSim-I	2.8
Jockey-4_DBp	2.8
(AACTAAC)n	2.79
(AATGATT)n	2.79
(AATTTT)n	2.79
(ATCCAGCC)n	2.79
(CAATAAT)n	2.79
(CCGCCAA)n	2.79
(TAATA)n	2.79
(TATTTTG)n	2.79
(TTAAGTT)n	2.79
(TTCTATA)n	2.79
Chouto_LTR	2.79
Copia-6_DWil-I	2.79
Gypsy-6_DRh-I	2.79
Gypsy-6_DTa-I	2.79
MDG1_I-int	2.79
(ATATATAC)n	2.78
(GAATATT)n	2.78
(TTATCTA)n	2.78
(TTTAAGA)n	2.78
DM176_I-int	2.78
FW2_DM	2.78
Gypsy-53_DWil-I	2.78
IDEFIX_I-int	2.78
(AAAGAT)n	2.77
(AATTTAA)n	2.77
(ATACT)n	2.77
(CACGTC)n	2.77
(CATATTT)n	2.77
(GGTCTT)n	2.77
Gypsy-32_DEl-I	2.77
Transib-7_DBi	2.77
(AACGCA)n	2.76
(AGTTT)n	2.76
(ATACATA)n	2.76
(ATTTATAT)n	2.76
(CTGTATT)n	2.76
(TATAACA)n	2.76
(TATACG)n	2.76
Gypsy-21_DBp-I	2.76
Gypsy-37_DEl-I	2.76
Gypsy-47_DEl-I	2.76
Gypsy18-LTR_Dya	2.76
HELENA_RT	2.76
I-3_DAn	2.76
Jockey-1_DK	2.76
R1-5B_DK	2.76
Transib-7_DRh	2.76
(AAGTAA)n	2.75
(AATTATC)n	2.75
(AGTTTTAT)n	2.75
(TATATTA)n	2.75
DOC2_DM	2.75
Gypsy4_LTR	2.75
Hoyak3	2.75
Pifo_I-int	2.75
(AATATGT)n	2.74
(AGTATA)n	2.74
(TATATCA)n	2.74
(TATTTTT)n	2.74
(TTATA)n	2.74
(TTATTTA)n	2.74
(TTTAATT)n	2.74
Gypsy-10_DBp-I	2.74
Transib1_Dwil	2.74
(CATATTA)n	2.73
(TATTATC)n	2.73
(TGGCATGG)n	2.73
(TTTCGAC)n	2.73
CR1-6_DT	2.73
Gypsy-29_DYa-LTR	2.73
Gypsy18-I_Dya	2.73
I-3_DF	2.73
I_DM	2.73
R1A_DAn	2.73
(AAGAACA)n	2.72
(ATTAATA)n	2.72
(CCTTC)n	2.72
(TAAGA)n	2.72
Gypsy12A_LTR	2.72
Gypsy6-I_Dya	2.72
Helitron-1_DYak	2.72
(AAAAGTA)n	2.71
(GACTTGG)n	2.71
(GCAATTC)n	2.71
(GCGGCC)n	2.71
(TATGATT)n	2.71
(TGTAA)n	2.71
(TTAACGA)n	2.71
Gypsy-8_DMoj-LTR	2.71
Gypsy20-I_Dpse	2.71
Helitron-1_DF	2.71
dmel_rDNA_ITS1	2.71
(AATATA)n	2.7
(ATAACAT)n	2.7
(ATGAGG)n	2.7
(ATTGT)n	2.7
(CATAAA)n	2.7
(GATCGCG)n	2.7
(GTATATA)n	2.7
(GTTAATTGT)n	2.7
(GTTTACTAT)n	2.7
(TATATAG)n	2.7
(TATGTACA)n	2.7
Copia-2_DAn-I	2.7
Gypsy-29_DEl-I	2.7
Gypsy-6_DFi-I	2.7
Gypsy7-I_Dya	2.7
Helitron-N2_DEl	2.7
Mariner-17_DAn	2.7
POGO	2.7
Transib2_DP	2.7
(AAGTAGT)n	2.69
(AGGATGCA)n	2.69
(ATAACTC)n	2.69
(CATTAG)n	2.69
(CTATG)n	2.69
(GCCAGCC)n	2.69
(TTTAATA)n	2.69
BEL-14_DTa-I	2.69
ZAM_I-int	2.69
(ATATACAA)n	2.68
(CTGGAC)n	2.68
(GTTGTCT)n	2.68
(TACTAT)n	2.68
(TATTTC)n	2.68
QUASIMODO_LTR	2.68
(ATCAC)n	2.67
(CTAATT)n	2.67
(GAGCAGA)n	2.67
(GATCCAA)n	2.67
(GCACTAAG)n	2.67
(GGACTGT)n	2.67
(TATAAGCTA)n	2.67
(TATAGTTCAA)n	2.67
(TTAATTA)n	2.67
(TTATAA)n	2.67
Gypsy-10_DTa-I	2.67
Gypsy-26_DPse-I	2.67
Polinton-2_DEu	2.67
Stalker2_I-int	2.67
Transib-N1_DM	2.67
(AATAGA)n	2.66
(AATCT)n	2.66
(AGTAGCC)n	2.66
(ATAATGT)n	2.66
(ATATGAA)n	2.66
(ATCTG)n	2.66
(GTATGA)n	2.66
(TATCTA)n	2.66
(TTAATAA)n	2.66
BEL-3_DYa-LTR	2.66
DM297_I-int	2.66
DNAREP1_DYak	2.66
I-2_DEu	2.66
Mariner-20_DK	2.66
(AAAAAT)n	2.65
(CAATATT)n	2.65
(CTTTTCATA)n	2.65
(GCATGTT)n	2.65
(GTAAT)n	2.65
(GTAGTTA)n	2.65
(TATATCC)n	2.65
(TGTAAT)n	2.65
(TTTACTC)n	2.65
Copia-1-I_DY	2.65
Gypsy-1_DBi-I	2.65
Gypsy-1_DSe-I	2.65
Gypsy-5_DSe-I	2.65
(AATCGAG)n	2.64
(ATA)n	2.64
(GGCAAAAT)n	2.64
(TATATACA)n	2.64
(TATTAA)n	2.64
BEL2-I_Dya	2.64
CR1-2_DF	2.64
Copia-5_DWil-I	2.64
Gypsy-11_DVir-I	2.64
Gypsy-13_DBi-I	2.64
Gypsy-4_DBi-LTR	2.64
I-4_DAn	2.64
Jockey-2_DK	2.64
Mariner-20_DAn	2.64
(ATATAAA)n	2.63
(ATATCATA)n	2.63
(ATTCGAT)n	2.63
(TAA)n	2.63
(TATTC)n	2.63
CR1-9_DTa	2.63
Gypsy-31_DEl-I	2.63
Invader5_LTR	2.63
Mariner-11_DAn	2.63
Stalker3_LTR	2.63
(AGACA)n	2.62
(ATGATAA)n	2.62
(ATTGAT)n	2.62
(GTGAGTG)n	2.62
(TAAGCA)n	2.62
(TAATAA)n	2.62
(TCATC)n	2.62
(TTAGTTT)n	2.62
(TTTTCGGA)n	2.62
Gypsy-42_DWil-I	2.62
Gypsy11-I_Dya	2.62
Gypsy2-LTR_DM	2.62
Jockey-7_DYa	2.62
(ACAAACT)n	2.61
(ACATAT)n	2.61
(ACTGGT)n	2.61
(AGAACTG)n	2.61
hAT-4_DK	2.61
(AGACAGG)n	2.6
(AGCGCA)n	2.6
(CAGTAG)n	2.6
(CCAACTA)n	2.6
(CTATC)n	2.6
(CTATTAA)n	2.6
(CTGCTAA)n	2.6
(TATTA)n	2.6
(TTCCTTT)n	2.6
(TTTTTAC)n	2.6
BEL1-I_DV	2.6
Helitron-1_DEu	2.6
MDG1_LTR	2.6
(AATATAG)n	2.59
(AATTCAC)n	2.59
(ACCTAGT)n	2.59
(ACTT)n	2.59
(ATGTTA)n	2.59
(ATTTATT)n	2.59
(GTTTTATC)n	2.59
(TTAGTAT)n	2.59
(TTTGATAT)n	2.59
Gypsy-16_DBi-I	2.59
Gypsy-22_DY-I	2.59
Kiri-1_DEl	2.59
(AATATTT)n	2.58
(ATATATA)n	2.58
(ATATTAA)n	2.58
(ATCTTA)n	2.58
(ATTTATA)n	2.58
(CGGAC)n	2.58
(GATGAAC)n	2.58
(TAAAGTT)n	2.58
(TAACTTT)n	2.58
(TATACTAT)n	2.58
(TCAGGC)n	2.58
(TGCGAC)n	2.58
DM412	2.58
Gypsy-12_DVir-I	2.58
Gypsy9-I_Dya	2.58
Jockey-5_DK	2.58
RSP-LIKE_SAT	2.58
(AAACCAG)n	2.57
(AAGAG)n	2.57
(AATATAT)n	2.57
(ACTTA)n	2.57
(ATAAAT)n	2.57
(ATAATAT)n	2.57
(ATAATTA)n	2.57
(GTGGGAG)n	2.57
(TGGCCAA)n	2.57
Bica_I-int	2.57
DNAREP1_DSim	2.57
Gypsy-15_DWil-I	2.57
Gypsy-24_DEl-I	2.57
Gypsy-31_DWil-I	2.57
Mariner-15_DK	2.57
(ATAA)n	2.56
(CCGTTTA)n	2.56
(CTGTCCGG)n	2.56
(GCTTTTG)n	2.56
(GGAGCAT)n	2.56
(TGTATT)n	2.56
BARI1	2.56
DNA4-1_DK	2.56
Gypsy-30_DAn-I	2.56
I-1_DEu	2.56
(AATATTC)n	2.55
(ACATA)n	2.55
(ATAAAAT)n	2.55
(ATATTAC)n	2.55
Gypsy-12_DRh-I	2.55
Helitron-2_DBp	2.55
Helitron-N2_DT	2.55
dmel_rDNA_2s_rDNA	2.55
(AACACAT)n	2.54
(ATATTG)n	2.54
(ATTAAAT)n	2.54
(ATTTGAT)n	2.54
(CGCTAC)n	2.54
(TAATAT)n	2.54
(TTACCT)n	2.54
(TTATTAT)n	2.54
Gypsy-2_DTa-I	2.54
Gypsy10_I-int	2.54
(AAGAC)n	2.53
(AATAATT)n	2.53
(AATTATTA)n	2.53
(ACATATT)n	2.53
(ACCGATA)n	2.53
(AGTAAA)n	2.53
(ATCATA)n	2.53
(GTTTCTG)n	2.53
(TATAAT)n	2.53
(TTAAGAT)n	2.53
Copia-2_DEl-I	2.53
Gypsy-6_DRh-LTR	2.53
Gypsy11-LTR_Dya	2.53
Jockey-10_DRh	2.53
Jockey-7_DEu	2.53
Transib-1_DBi	2.53
piRNA_cluster_flamenco	2.53
(AATGGTA)n	2.52
(ATATTTA)n	2.52
(ATTAACA)n	2.52
(CACTTAA)n	2.52
(CGTCTG)n	2.52
(GGCCG)n	2.52
(TATTCA)n	2.52
(TTAATA)n	2.52
(TTATGAA)n	2.52
BEL-1_DEre-I	2.52
GTWIN_LTR	2.52
Gypsy-5_DPer-I	2.52
Helitron-1_DK	2.52
Helitron-2_DF	2.52
MuDR-1_DEl	2.52
(AATATTA)n	2.51
(AATTGTT)n	2.51
(ATTCT)n	2.51
(CTATAT)n	2.51
(CTATTTA)n	2.51
(GTTATTT)n	2.51
(TATACA)n	2.51
(TCGGTTC)n	2.51
(AACAAGC)n	2.5
(ACATATATAT)n	2.5
(ACCTAACA)n	2.5
(ACTATTC)n	2.5
(AGAAAC)n	2.5
(ATAAT)n	2.5
(ATACCGA)n	2.5
(ATTAGAT)n	2.5
(CAAGTTA)n	2.5
(GATTAG)n	2.5
(GTTATC)n	2.5
(TAACAG)n	2.5
(TAATGTTAA)n	2.5
(TACAGAC)n	2.5
(TTGTCC)n	2.5
BEL-19_DAn-I	2.5
BEL-4_DEl-I	2.5
Copia-3_DWil-I	2.5
Gypsy-14_DTa-I	2.5
Gypsy-28_DAn-I	2.5
Jockey-11_DF	2.5
(ATAATAA)n	2.49
(ATTT)n	2.49
(GAATTT)n	2.49
(GCCCTT)n	2.49
(GTCAA)n	2.49
(TAGTA)n	2.49
(TATATAA)n	2.49
(TCATA)n	2.49
BEL-14_DP-I	2.49
Gypsy-12_DSim-LTR	2.49
Gypsy10_LTR	2.49
Transib-3_DF	2.49
(ATACCA)n	2.48
(ATGTAA)n	2.48
(ATGTCTGGG)n	2.48
(GTGGATCA)n	2.48
(TCAGTAT)n	2.48
(TTTACG)n	2.48
BEL-7_DMoj-I	2.48
DNA3-1_DTa	2.48
hAT-8_DBp	2.48
(AATAGTA)n	2.47
(AATGTT)n	2.47
(ATTA)n	2.47
(ATTAGT)n	2.47
(CCCTTCT)n	2.47
(CCGTGC)n	2.47
(CCTGGTC)n	2.47
(CTCCGTG)n	2.47
(TAAGT)n	2.47
(TAAGTA)n	2.47
(TCTGTG)n	2.47
(TGCGTGA)n	2.47
(TTAA)n	2.47
(TTAGATT)n	2.47
(TTAGTT)n	2.47
(TTTTGTG)n	2.47
CR1-1_DEl	2.47
Gypsy3-I_Dya	2.47
(AAATGGC)n	2.46
(AATTATGT)n	2.46
(AATTTA)n	2.46
(ACAATTT)n	2.46
(ATTATTT)n	2.46
(CCTCGG)n	2.46
(CTCCAGG)n	2.46
(CTGGAACA)n	2.46
(GCTGGTC)n	2.46
(GGTCCCGGT)n	2.46
(TAATGTC)n	2.46
(TAGTACT)n	2.46
(TTTTTTA)n	2.46
DNAREP1_DM	2.46
Gypsy-21_DEl-I	2.46
Gypsy-46_DWil-I	2.46
Gypsy-7_DBi-I	2.46
Gypsy-9_DSim-I	2.46
Gypsy16-I_Dpse	2.46
Gypsy7_LTR	2.46
Jockey-14_DBp	2.46
(AAGTAT)n	2.45
(ATATAA)n	2.45
(TAAGAA)n	2.45
(TAATAC)n	2.45
(TTA)n	2.45
(TTATAT)n	2.45
(TTCATA)n	2.45
Gypsy-9_DMoj-LTR	2.45
(AACGATT)n	2.44
(AATCGT)n	2.44
(AATTAT)n	2.44
(ACTAAA)n	2.44
(AGTAGG)n	2.44
(ATAGA)n	2.44
(ATTAGAG)n	2.44
(CCATTCT)n	2.44
(TCCTTT)n	2.44
(TCTGTAT)n	2.44
BEL-2_Deu-I	2.44
BEL-3_DBp-I	2.44
Gypsy-1_DRh-I	2.44
Gypsy-21_DAn-I	2.44
(AACGATA)n	2.43
(ATTCAGC)n	2.43
(CATACTA)n	2.43
(GCTATCA)n	2.43
(TACAAT)n	2.43
(TTTTA)n	2.43
BEL-13_DWil-I	2.43
I-6_DY	2.43
Jockey-9_DAn	2.43
(AATTATT)n	2.42
(ACGAATA)n	2.42
(ATAATTT)n	2.42
(ATATTCA)n	2.42
(ATATTTT)n	2.42
(ATTACCG)n	2.42
(TAGTTT)n	2.42
(TATATGTA)n	2.42
(TTAAGT)n	2.42
Gypsy-8_DEl-LTR	2.42
Gypsy11-I_Dpse	2.42
MINOS	2.42
(AACTAAG)n	2.41
(AATTGTA)n	2.41
(ACACTCACTC)n	2.41
(ATTATTG)n	2.41
(TATAC)n	2.41
(TATTACA)n	2.41
(TTAAC)n	2.41
(TTACGGT)n	2.41
BEL-5_DRh-I	2.41
Gypsy-5_DKi-I	2.41
Gypsy-6_DEl-LTR	2.41
REP-1_DTa	2.41
(AACACCA)n	2.4
(ATAATA)n	2.4
(ATGATGA)n	2.4
(ATGCTCC)n	2.4
(CCGCCCC)n	2.4
(TATTTA)n	2.4
FB4_DM	2.4
Gypsy2_LTR	2.4
Hoyak2	2.4
Mariner-3_DEl	2.4
(AAAGC)n	2.39
(ACAATAC)n	2.39
(ATTTGAC)n	2.39
(CCATCCC)n	2.39
(TAATCACT)n	2.39
(TATAT)n	2.39
(TATCGT)n	2.39
(TATGA)n	2.39
(TGCATA)n	2.39
(TTTATTA)n	2.39
BEL-3_DFi-I	2.39
BLOOD_LTR	2.39
DMLTR5	2.39
Gypsy-8_DPer-I	2.39
hAT-6_DRh	2.39
(AGTTAT)n	2.38
(ATATGTT)n	2.38
(ATTAA)n	2.38
(ATTCACT)n	2.38
(ATTGCAC)n	2.38
(GATTATT)n	2.38
(GGTATAT)n	2.38
(TGGGCC)n	2.38
(TTGTCCG)n	2.38
Gypsy-4_DAn-I	2.38
(AAAGCAG)n	2.37
(AAGAGCA)n	2.37
(AATAACC)n	2.37
(AATACT)n	2.37
(ACAGTAA)n	2.37
(ACCATG)n	2.37
(AGGAT)n	2.37
(ATTAATT)n	2.37
(CATTAA)n	2.37
(CTAGATG)n	2.37
(GATAT)n	2.37
(TAAGC)n	2.37
(TATGTT)n	2.37
(TTGTAAT)n	2.37
(TTTATAT)n	2.37
Gypsy-12_DFi-I	2.37
Gypsy-24_DYa-LTR	2.37
Gypsy-28_DYa-I	2.37
Harbinger-1_DW	2.37
Helitron-7_DRh	2.37
Helitron-N2_DBi	2.37
(AGTTTA)n	2.36
(ATAAA)n	2.36
(ATAGATATC)n	2.36
(ATCAAT)n	2.36
(CATCATT)n	2.36
(CTCCGCT)n	2.36
(CTTCT)n	2.36
(GGCAAAT)n	2.36
(GTTTAT)n	2.36
(TAATGA)n	2.36
(TACCTG)n	2.36
(TACTA)n	2.36
CR1-4_DK	2.36
Gypsy-4_DAn-LTR	2.36
Transib-4_DRh	2.36
(AACTAT)n	2.35
(ACTTTT)n	2.35
(AGGCAG)n	2.35
(AGTGCCT)n	2.35
(ATTCCAA)n	2.35
(CATCTCA)n	2.35
(CCGC)n	2.35
(CCTGGCT)n	2.35
(CTCTTTT)n	2.35
(TAAGATA)n	2.35
(TAATT)n	2.35
(TTTTGAA)n	2.35
Copia-3_DAn-I	2.35
Gypsy-5_DEl-I	2.35
Mariner-17_DK	2.35
(AATATT)n	2.34
(ACATAA)n	2.34
(ACGTACCC)n	2.34
(ACTTT)n	2.34
(AGTTTGT)n	2.34
(ATAGCGA)n	2.34
(CTGCCCT)n	2.34
(GGAATAT)n	2.34
(TATCGGC)n	2.34
(TCGTTCT)n	2.34
(TTACATT)n	2.34
(TTTAC)n	2.34
(TTTATA)n	2.34
Gypsy-13_DEl-I	2.34
Gypsy-41_DAn-LTR	2.34
(AAAAATC)n	2.33
(ATAAGAT)n	2.33
(ATAATC)n	2.33
(ATTAACT)n	2.33
(CTTATA)n	2.33
(TAACACA)n	2.33
(TAGGTA)n	2.33
(TATTTGC)n	2.33
(TCTTTG)n	2.33
(TTAAGTA)n	2.33
CR1-5_DT	2.33
I-1_DEl	2.33
Mariner-4_DY	2.33
(AATT)n	2.32
(AGTCAGTT)n	2.32
(ATATTT)n	2.32
(ATTTTAT)n	2.32
(CATTATAT)n	2.32
(CTGGATGC)n	2.32
(CTTTGAA)n	2.32
(TAATACA)n	2.32
(TATATA)n	2.32
(TATATG)n	2.32
(TATTTTA)n	2.32
(TTATATT)n	2.32
(TTTAAT)n	2.32
Gypsy-4_DSe-LTR	2.32
Harbinger1_DYa	2.32
Mariner-4_DRh	2.32
(AAT)n	2.31
(AATAG)n	2.31
(ACTGGAC)n	2.31
(AGATAGAA)n	2.31
(AGATTAT)n	2.31
(ATAAC)n	2.31
(CGCAACC)n	2.31
(CTAGTAGAC)n	2.31
(GCATAA)n	2.31
(GCCCCCA)n	2.31
(TAGAAT)n	2.31
(TTCGATAACA)n	2.31
(TTTATTC)n	2.31
Jockey-5_DYa	2.31
Mariner-1_DF	2.31
(AATACTC)n	2.3
(ATAAGA)n	2.3
(ATATAT)n	2.3
(ATCTTT)n	2.3
(ATTTAA)n	2.3
(ATTTATG)n	2.3
(ATTTTTT)n	2.3
(CCCAACA)n	2.3
(CTCTTG)n	2.3
(GTTAT)n	2.3
(TTAGCC)n	2.3
(TTCTCTC)n	2.3
(TTTA)n	2.3
(TTTATAA)n	2.3
(TTTCTTG)n	2.3
Helitron-N1_DEl	2.3
MuDR-1_DK	2.3
R1-1_DEr	2.3
TABOR_I-int	2.3
dmel_rDNA_18S_rDNA	2.3
(ATAACG)n	2.29
(ATCAATC)n	2.29
(ATCTA)n	2.29
(ATTACATTA)n	2.29
(CATTCCG)n	2.29
(CATTTCG)n	2.29
(CGTTTTT)n	2.29
(CTTTATT)n	2.29
(GATGT)n	2.29
(GGACAAT)n	2.29
(GGGGC)n	2.29
(TCTCTCC)n	2.29
(TGGATGGG)n	2.29
(TGTGTGCGTA)n	2.29
BEL-5_DPer-I	2.29
Gypsy-17_DAn-I	2.29
Helitron-N1_DBi	2.29
Jockey-7_DRh	2.29
(AATAT)n	2.28
(AGTCAGG)n	2.28
(ATAGAT)n	2.28
(ATCAT)n	2.28
(ATCGCAT)n	2.28
(CACACACACT)n	2.28
(CCCATGC)n	2.28
(CCTTTC)n	2.28
(GTTGGCTG)n	2.28
(TACATT)n	2.28
(TAGAA)n	2.28
(TAGTGG)n	2.28
(TCGACT)n	2.28
Gypsy-28_DBp-I	2.28
Jockey-1_DF	2.28
Jockey-6_DAn	2.28
Mariner-8_DF	2.28
REP-2_DTa	2.28
Transib4_DP	2.28
(AAAACAA)n	2.27
(AACAGCAGC)n	2.27
(AACTGTT)n	2.27
(ACCTGG)n	2.27
(ATATATACAT)n	2.27
(ATTTA)n	2.27
(CCGTCCA)n	2.27
(CTCTGAT)n	2.27
(GTTAAT)n	2.27
(GTTCTCT)n	2.27
(TAACATT)n	2.27
(TAGC)n	2.27
(TCCTA)n	2.27
(TTAATG)n	2.27
BEL-3_DEl-I	2.27
Gypsy-1_DSe-LTR	2.27
Transib-1_DRh	2.27
hAT-N1_DK	2.27
(AATTTAT)n	2.26
(AGGATA)n	2.26
(CAACACC)n	2.26
(CAATTAT)n	2.26
(CAGGCGCCAA)n	2.26
(CATAATT)n	2.26
(GCTCAG)n	2.26
(TACATAA)n	2.26
(TATA)n	2.26
(TATCATT)n	2.26
(TTACTG)n	2.26
(TTGTATT)n	2.26
(TTTCTTC)n	2.26
TV1I	2.26
(AATTTC)n	2.25
(ACACTCA)n	2.25
(AGTTTTA)n	2.25
(ATAT)n	2.25
(ATTACA)n	2.25
(CAGAAACTC)n	2.25
(GCACCATT)n	2.25
(GCCTCC)n	2.25
(GCTATAT)n	2.25
(TCTTC)n	2.25
(TGAAGTT)n	2.25
(TTCATAA)n	2.25
CR1-1_DWil	2.25
DMR_DV	2.25
Gypsy-19_DWil-I	2.25
(ACGGATC)n	2.24
(ATTATG)n	2.24
(CAATTAA)n	2.24
(CAGTAA)n	2.24
(CCTCTGAG)n	2.24
(CCTGCCAT)n	2.24
(GAAAAAT)n	2.24
(GGGCA)n	2.24
(TACCTATTAC)n	2.24
(TCATTA)n	2.24
(TGCCGTC)n	2.24
(TGGGTGGT)n	2.24
(TTTCATA)n	2.24
hAT-5_DK	2.24
(AAAATA)n	2.23
(AATA)n	2.23
(ACACATAG)n	2.23
(ATAAGCG)n	2.23
(ATGGAGGC)n	2.23
(ATTAATG)n	2.23
(GGAAGG)n	2.23
(GGGAGA)n	2.23
(TATATAC)n	2.23
(TATGTA)n	2.23
(TCATTAC)n	2.23
(TTTTAT)n	2.23
CR1-1_DBi	2.23
Gypsy-29_DYa-I	2.23
(AAAT)n	2.22
(ATAATT)n	2.22
(ATTTTTA)n	2.22
(CGCCTGT)n	2.22
(GATCGAC)n	2.22
(TTTATT)n	2.22
(TTTGTA)n	2.22
(TTTTAAG)n	2.22
Gypsy-4_DRh-I	2.22
Gypsy-59_DWil-I	2.22
Gypsy12-I_Dpse	2.22
Stalker2_LTR	2.22
(AACGGAT)n	2.21
(AATTA)n	2.21
(ATATCAA)n	2.21
(ATTTAAG)n	2.21
(CAACTAA)n	2.21
(CACTGG)n	2.21
(CATTTTA)n	2.21
(CGCGA)n	2.21
(CTCTCGT)n	2.21
(TAAA)n	2.21
(TAAT)n	2.21
(TCACC)n	2.21
(TCGCTA)n	2.21
(TTACTCG)n	2.21
(TTAGGG)n	2.21
(TTCGAGT)n	2.21
(TTGGGGA)n	2.21
BEL-1_DWil-I	2.21
I-2_DVi	2.21
Jockey-11_DAn	2.21
Jockey-4_DAn	2.21
P_DG	2.21
(AATATAA)n	2.2
(ATGACA)n	2.2
(CCGTG)n	2.2
(GAGGAGCTA)n	2.2
(TAATATT)n	2.2
(TATTAAAAG)n	2.2
(TGTCGAGGA)n	2.2
(TTAAT)n	2.2
BLASTOPIA_I-int	2.2
FROGGER_I-int	2.2
FROGGER_LTR	2.2
(AACATT)n	2.19
(AGCAGCA)n	2.19
(AGCTGTG)n	2.19
(AGGCAGA)n	2.19
(ATTAGA)n	2.19
(CCTA)n	2.19
(CCTCCTGGT)n	2.19
(CTCTACAG)n	2.19
(GATTTA)n	2.19
(TA)n	2.19
(TAATCTT)n	2.19
(TATTAATA)n	2.19
(TCCGACA)n	2.19
(TGTGTGGG)n	2.19
(TTAATTT)n	2.19
(TTCCCTT)n	2.19
Gypsy-8_DTa-I	2.19
Jockey-2_DEl	2.19
R1-1_DPer	2.19
(ACCATCCA)n	2.18
(ATTATT)n	2.18
(CAAGTCC)n	2.18
(CCCGCC)n	2.18
(CGCCCAA)n	2.18
(CGGAGAAT)n	2.18
(CTATA)n	2.18
(GGAATTG)n	2.18
(TAAGTAA)n	2.18
(TGTTGTT)n	2.18
BEL-4_DFi-I	2.18
DNAREP2_DSim	2.18
Gypsy12-I_Dya	2.18
(AATATC)n	2.17
(AATGAC)n	2.17
(AGATAAA)n	2.17
(AGG)n	2.17
(AGTTACG)n	2.17
(ATAAGC)n	2.17
(ATAATTC)n	2.17
(ATTAAT)n	2.17
(CCAGCC)n	2.17
(CCGCT)n	2.17
(CCTTTTT)n	2.17
(CTGAATGA)n	2.17
(CTTATAT)n	2.17
(GGCAGAA)n	2.17
(GGCAGCA)n	2.17
(GTTGTAT)n	2.17
(TAATTTT)n	2.17
(TATTATG)n	2.17
(TTAATTG)n	2.17
(TTATTA)n	2.17
(TTCGTAG)n	2.17
BEL3_DM-I	2.17
(AATACAG)n	2.16
(AATCAAT)n	2.16
(AATCTGA)n	2.16
(ACATGT)n	2.16
(ATACTAT)n	2.16
(ATCTTAC)n	2.16
(ATTAAC)n	2.16
(ATTATC)n	2.16
(CAATTTT)n	2.16
(TAGTAG)n	2.16
(TAGTC)n	2.16
(TATACTC)n	2.16
(TCCGTTG)n	2.16
(TGTATAA)n	2.16
(TTAC)n	2.16
(TTGAGTG)n	2.16
(TTTAAA)n	2.16
BEL-1_DBi-I	2.16
BEL-5_DVir-I	2.16
DNA8-1_DEl	2.16
Gypsy-18_DTa-I	2.16
Gypsy-3_DRh-LTR	2.16
Jockey-4_DEl	2.16
hAT-5_DBp	2.16
(AAATATTG)n	2.15
(AATGT)n	2.15
(AATTAC)n	2.15
(ATGGTAT)n	2.15
(CACGGAG)n	2.15
(CCAGATG)n	2.15
(GTGAT)n	2.15
(GTGGCCA)n	2.15
(TAATC)n	2.15
(TATAACC)n	2.15
(TCGAATCAC)n	2.15
(TTGTATA)n	2.15
(TTTAA)n	2.15
(TTTGCAGT)n	2.15
Gypsy-13_DVir-I	2.15
Gypsy-33_DEl-I	2.15
MDG3_LTR	2.15
Pifo_LTR	2.15
(AAAGCCAG)n	2.14
(ACTTTTA)n	2.14
(AGGATGT)n	2.14
(ATATTGT)n	2.14
(ATTGTTA)n	2.14
(ATTTTA)n	2.14
(CAAGCT)n	2.14
(CCAGCCC)n	2.14
(CCATGTG)n	2.14
(GAATAC)n	2.14
(GACTCG)n	2.14
(GTAGA)n	2.14
(TAGCAGA)n	2.14
(TCATG)n	2.14
(TGTAATC)n	2.14
(TGTTTA)n	2.14
(TTTAGTT)n	2.14
(TTTCGAT)n	2.14
Gypsy-31_DYa-LTR	2.14
Gypsy-7_DVir-LTR	2.14
Helitron-1_DT	2.14
Mariner-3_DK	2.14
(AAACGT)n	2.13
(AAATGCG)n	2.13
(AATGTTT)n	2.13
(ATACAGT)n	2.13
(ATAGTAATA)n	2.13
(CATGTCTTGT)n	2.13
(CGTCC)n	2.13
(GTCCAGT)n	2.13
(TAAAT)n	2.13
(TATGAA)n	2.13
(TCTAA)n	2.13
(TGATATA)n	2.13
BEL-12_DEl-I	2.13
BEL-1_Deu-I	2.13
Gypsy-46_DEl-LTR	2.13
TC1_DM	2.13
hAT-N1B_DBp	2.13
(AGATTTC)n	2.12
(AT)n	2.12
(ATACAG)n	2.12
(ATAGTTTC)n	2.12
(ATCTGG)n	2.12
(CCACCTA)n	2.12
(CTGCGTG)n	2.12
(GATAGA)n	2.12
(GCATTAT)n	2.12
(GTCACT)n	2.12
(GTCTT)n	2.12
(GTTTATA)n	2.12
(TATCAT)n	2.12
(TTATCA)n	2.12
BS4_DM	2.12
I-4_DK	2.12
Mariner-9_DAn	2.12
R1_DYa	2.12
(AACTAA)n	2.11
(ACAATTA)n	2.11
(ACACT)n	2.11
(ACACTCC)n	2.11
(CATTTAC)n	2.11
(CTATCGG)n	2.11
(CTTTTA)n	2.11
(TAAATAA)n	2.11
(TATATT)n	2.11
(TATCAAT)n	2.11
(TATGGGC)n	2.11
(TTGCGG)n	2.11
(TTGGTAGT)n	2.11
Copia-2_DPer-I	2.11
(AAATGGG)n	2.1
(AATC)n	2.1
(AATTTTT)n	2.1
(ACGAGT)n	2.1
(ACTGACTA)n	2.1
(AGATCC)n	2.1
(AGGAGTC)n	2.1
(AGGATTG)n	2.1
(AGGGT)n	2.1
(AGTTAAT)n	2.1
(ATCCATT)n	2.1
(ATTTTCA)n	2.1
(CATCCCGGG)n	2.1
(GGCGTT)n	2.1
(TAATCTG)n	2.1
(TATTATA)n	2.1
(TCGCCCGA)n	2.1
(TGCGATG)n	2.1
(TGGTGAT)n	2.1
(TTTCTTT)n	2.1
(TTTTTTAG)n	2.1
BEL-4_DYa-I	2.1
BEL-6_DBp-I	2.1
CR1-4_DAn	2.1
Invader5_I-int	2.1
Jockey-5_DPer	2.1
(AAAATAC)n	2.09
(AAACTA)n	2.09
(AATTT)n	2.09
(ATCGTTA)n	2.09
(ATTGTAG)n	2.09
(ATTTCAA)n	2.09
(CCTAAT)n	2.09
(GCCGAGAAA)n	2.09
(GTAA)n	2.09
(TAC)n	2.09
(TATTTTC)n	2.09
(TCTGGG)n	2.09
(TGATTTT)n	2.09
(TTTTTGA)n	2.09
Jockey-4_DK	2.09
(GATATGG)n	2.08
(GTATT)n	2.08
(TACTAA)n	2.08
(TGCCTAG)n	2.08
(TGTTAA)n	2.08
(TTATT)n	2.08
BEL-9_DWil-I	2.08
Copia-1_DVir-I	2.08
(AATAGTG)n	2.07
[truncated: 8,124 more rows]

## Sheet: replicate 4
Figure 2-source data 3. Rhino ChIP-seq enrichment scores for all repeats in the genome. Data from (Mohn, et al. 2014; Zhang, et al. 2014; Parhad, et al. 2017).
#repeat	#chip/input(RPM)
(TAGACAA)n	71.2
(ATAACTTA)n	50
(TCTATTG)n	35.95
(GTTATA)n	32
(TATATCAA)n	31
(TTGTCTATT)n	29.8
(CTAATT)n	24.24
(TAAAG)n	21.8
(AATTAAG)n	21
(ATTTAATT)n	21
(TATTAG)n	21
piRNA_cluster_42AB	19.51
Gypsy-19_DTa-I	18.12
Gypsy-12_DVir-I	16.22
(ATACATACAT)n	16.09
(CCCCTGA)n	15
Gypsy8_I-int	14.68
(GGGCAATGG)n	14.07
(ATTCTAA)n	14
(ATTTACC)n	14
(CAATGTT)n	14
(TAATTC)n	14
(CATATTG)n	13.5
(TTTAAGA)n	13.2
(TTTCCTT)n	13
(AATAGAC)n	12.49
(ATATAAC)n	11.99
(AACACAT)n	11.75
(TCTCC)n	11.7
(AACCCAGA)n	11.67
(TATGTTTA)n	11.5
(GAGGA)n	11.16
(GGAGA)n	11.02
(TAGAAA)n	11
(AATTATC)n	10.5
(GTTAG)n	10.4
BEL-3_DBp-I	10.4
(ACAGTTT)n	10
(ACTATTT)n	10
(CATATATA)n	9.18
(TAACTTT)n	9
(TTAAAT)n	9
(TCTAT)n	8.92
piRNA_cluster_80F	8.85
Invader6_LTR	8.81
(TAGTAG)n	8.79
NINJA_I-int	8.79
Copia-3_DBp-I	8.77
Rehavkus-1_DY	8.48
TART-A	8.39
(CCAGGTT)n	8.38
(CCCAATG)n	8.17
(ACTCCAT)n	8.09
(ATACTTC)n	8
(TTAGTAT)n	8
(TTTTCGGT)n	8
(TTTTTAC)n	8
(CATATAA)n	7.9
Invader6_I-int	7.9
(AATGAAATG)n	7.81
HETA_DSi	7.56
(ATTCTGAA)n	7.5
(TTGCCTT)n	7.5
(GACTGGA)n	7.33
(GATTAT)n	7.33
Gypsy-13_DSim-I	7.19
Homo1	7.09
piRNA_cluster_38C2	7.06
MAX_I-int	7.04
(AATTAGA)n	7
(ATACTA)n	7
(ATAGTAATA)n	7
(GATTA)n	7
(TAAGTT)n	7
(TATATACA)n	7
(TGCGT)n	7
(TTAAAA)n	7
(TTAGGA)n	7
R1-1_DSi	6.98
(AACAATA)n	6.75
(AATAAAC)n	6.7
(TTACCTT)n	6.67
(TTACTG)n	6.67
(AGAGG)n	6.66
(ATCCCCC)n	6.64
(AAACTT)n	6.5
(TAGCTG)n	6.5
(ACTCCAGG)n	6.4
(AGGATA)n	6.4
(AGTTTA)n	6.4
(GGAGCTGA)n	6.33
(TACCTC)n	6.33
(TACACAT)n	6.29
(TTTTACA)n	6.25
(AGGTT)n	6.2
(GTGTATGG)n	6.2
(AGTATT)n	6.16
(ACAAT)n	6.12
(ATAGA)n	6.12
HETA	6.12
(CCCCCAACTG)n	6.05
MAX_LTR	6.04
(AAGTTA)n	6
(AATCCTC)n	6
(ATATACAGT)n	6
(ATATAGA)n	6
(CTTTACTA)n	6
(TTAATTC)n	6
(TTTATGG)n	6
Gypsy-12_DTa-LTR	6
R1_DSi	5.99
Gypsy1-I_Dmoj	5.97
DMRT1A	5.89
(TCCCCCA)n	5.83
(TAGAA)n	5.81
(TATCT)n	5.8
(CATAGAA)n	5.79
(CCGGACC)n	5.75
(TCCTTT)n	5.69
(AATATAAT)n	5.67
(AGGGT)n	5.67
NOF_FB	5.67
G_DM	5.64
(ATAAAT)n	5.6
Copia-1_DSe-I	5.57
DMRT1B	5.56
R1-1_DYa	5.54
(TGTATTG)n	5.5
BEL-12_DTa-I	5.5
Gypsy8_LTR	5.47
(ATTCTTT)n	5.43
(TTATGTA)n	5.43
(TTCATTTCA)n	5.37
Mariner-6_DBi	5.26
(ATAGATA)n	5.25
(TTTAATAA)n	5.25
R1_DSe	5.25
(CCATAA)n	5.22
Gypsy-3_DGri-I	5.21
(CATTGAA)n	5.2
BATUMI_I-int	5.2
Jockey-3_DM	5.11
(ATAAACT)n	5
(ATACATT)n	5
(ATTAG)n	5
(CCCCTC)n	5
(GGGGC)n	5
(GTTTTTA)n	5
(TACTAA)n	5
(TTTACTC)n	5
(TTGTA)n	4.91
HETRP_DM	4.84
(ATTAAC)n	4.83
(CAATTAC)n	4.83
(CCGAACC)n	4.83
(GTAAT)n	4.8
Gypsy-6_DEl-LTR	4.79
BEL-22_DTa-I	4.77
TART_B1	4.77
(CTTTGAA)n	4.75
(TAAGCAA)n	4.75
(TACAA)n	4.75
(ATTATAA)n	4.73
TAHRE	4.73
(TAAATAA)n	4.67
(TCTAC)n	4.64
(TTCCCGG)n	4.62
Gypsy-23_DYa-I	4.61
(ATATCATA)n	4.6
(TTTCGTG)n	4.6
Mariner-16_DRh	4.6
G6_DM	4.58
DMRT1C	4.53
(AATATAC)n	4.5
(AAAACAA)n	4.4
(GAAACCGA)n	4.4
(TCTAGTA)n	4.4
(ATCCAACC)n	4.36
(TCTCCGC)n	4.36
(GCACTT)n	4.33
(GGGAAACT)n	4.33
(TCAAA)n	4.33
(TTTTTCCA)n	4.33
(ATTGGCT)n	4.31
(TGTAATA)n	4.29
(AATTTTG)n	4.25
(CTTTTTA)n	4.25
(AGAATAT)n	4.2
(ATTTCAA)n	4.2
Gypsy-31_DEl-LTR	4.2
Jockey-1_DSe	4.13
(GCCTCTGCC)n	4.09
Gypsy-7_DSim-I	4.09
Gypsy-7_DSe-I	4.07
Copia-1_DBp-I	4.03
(AATTATAG)n	4
(ATACTGT)n	4
(ATCTTT)n	4
(GATTTAA)n	4
(TATAGTT)n	4
(TTGAATA)n	4
Gypsy-4_DSim-I	4
(CAGCATC)n	3.92
(TATGATT)n	3.91
(TTACGTT)n	3.91
Gypsy12_LTR	3.91
(AGAACAA)n	3.86
(TTATTAA)n	3.83
1pt688.3L_locus	3.83
(AAAAATC)n	3.8
(ACCCCAA)n	3.8
(TAGAAT)n	3.8
(TGTGCTG)n	3.79
(GCGGAGG)n	3.78
Copia-1_DSe-LTR	3.78
(TCTCATC)n	3.76
(TACAT)n	3.75
(TATACAA)n	3.75
(TATGGTG)n	3.75
(CTAGCAA)n	3.71
(GTTCTTT)n	3.71
Gypsy15-LTR_Dya	3.68
(AATAACT)n	3.67
(AATACTC)n	3.67
(ATAAGAA)n	3.67
(GGAAG)n	3.67
(ATAATAATC)n	3.64
Gypsy-13_DSim-LTR	3.63
hAT-2_DRh	3.63
(AAGTCAA)n	3.62
(TTCCGTA)n	3.62
Gypsy-3_DSe-I	3.62
R1-4_DYa	3.62
R1-5_DYa	3.61
(ATACTAA)n	3.6
(TATGTATC)n	3.6
Gypsy-5_DWil-I	3.6
Jockey-7_DEu	3.6
(GGGAATGG)n	3.58
1pt688.Contig101_locus	3.58
Gypsy-14_DFi-I	3.58
(GATTTCA)n	3.57
(AACTAT)n	3.56
NINJA_LTR	3.54
(ACAAATGT)n	3.53
(TCCGTTG)n	3.52
(AAAAGGC)n	3.5
(ATTAATG)n	3.5
(CTATCGG)n	3.5
(GTTTTATC)n	3.5
(TAGTTGG)n	3.5
(TATACTAT)n	3.5
Gypsy-26_DYa-I	3.48
Gypsy-11_DTa-LTR	3.46
Helitron-N1_DAn	3.46
(GTCCAGT)n	3.44
(ATTTATGT)n	3.4
(TTACTCT)n	3.4
BATUMI_LTR	3.4
(ACGGCGA)n	3.38
(CCAGGCT)n	3.38
(TAATCTA)n	3.38
BEL-3_DBi-I	3.38
(CCGCCT)n	3.37
(AAGAT)n	3.35
(ACAAGAA)n	3.33
(CCTGATG)n	3.33
(CTCATA)n	3.33
(GTTAATTGT)n	3.33
(GTTCACA)n	3.33
(TAATTTA)n	3.33
(TACAATT)n	3.33
(TACTATA)n	3.33
(TTGTTCT)n	3.33
(TTTGATAT)n	3.33
(ACTCCAC)n	3.31
(TCCTC)n	3.31
(TTTGTTA)n	3.31
DM1731_I-int	3.3
Gypsy13-I_Dpse	3.3
(TTCGATAACA)n	3.29
(AGCTGCA)n	3.26
BS2	3.26
R1-2_DTa	3.26
(TTAACAA)n	3.25
Jockey-10_DF	3.25
Jockey-3_DSim	3.25
piggyBac-1_DW	3.25
Copia-1_DBi-I	3.23
Gypsy-7_DSe-LTR	3.23
(ACCCGGGA)n	3.22
(ATCTTTGT)n	3.22
(GTTCAGA)n	3.21
(ATAAATA)n	3.2
(TAACAG)n	3.2
(TAATCCG)n	3.2
(TCTACAA)n	3.2
Copia1-I_DM	3.2
Gypsy-5_DKi-LTR	3.2
R1_DEr	3.19
(TGTTTAT)n	3.17
Transib-6_DBp	3.17
(TTTCAGCA)n	3.14
(GCCATG)n	3.13
I-5_DK	3.13
(AGTTTGT)n	3.12
(GCTCACT)n	3.12
(GTATTCC)n	3.12
(TGTTTAA)n	3.12
R1_DM	3.11
(CCCTCA)n	3.1
(AATAC)n	3.09
(TTTAACA)n	3.09
(CATAATA)n	3.08
Outcast-1_DT	3.08
(TGAGTCT)n	3.06
Chimpo_I-int	3.06
(AGTAGCC)n	3.05
(TCTTTAG)n	3.05
Gypsy-8_DFi-I	3.04
piRNA_cluster_38C1	3.04
(TTTATTA)n	3.03
(ACATAAT)n	3
(ATATGAA)n	3
(ATGAT)n	3
(CAGACGGA)n	3
(CCCCATGAA)n	3
(GATTATT)n	3
(TAATTAC)n	3
(TACCTT)n	3
(TATATTGA)n	3
(TATTATAT)n	3
(TATTCAT)n	3
(TTAAGTT)n	3
(AACGCA)n	2.98
dmel_rDNA_ETS	2.98
(TTTAAGT)n	2.96
(ATTGTA)n	2.94
(CGTTG)n	2.94
(AGTGTT)n	2.93
(ATAACCC)n	2.93
(TGGCGGA)n	2.93
Transib-6_DRh	2.93
(CATCGGA)n	2.92
(TGAACAC)n	2.92
(TTGAGAA)n	2.92
(GCGGGGAAAA)n	2.9
(GTCCTCCA)n	2.89
(GGCGGAT)n	2.88
(TTACATC)n	2.88
(GCTTTGA)n	2.86
(GCTCAC)n	2.85
(GGAGCG)n	2.84
(AGTAGAA)n	2.83
(AGTCAGG)n	2.83
(TCTAGA)n	2.83
(TGTTTAC)n	2.82
dmau_rDNA_ETS	2.82
(CCATT)n	2.81
Helitron-2_DBp	2.81
(GCTCTG)n	2.8
(GTAATTA)n	2.8
(TGAGAC)n	2.8
(GGATCTG)n	2.78
(GTCGACC)n	2.78
(TATCGTA)n	2.78
BS	2.78
Mariner-2_DVi	2.78
Polinton-2_DEu	2.78
1pt688.2L_2_260bp_locus	2.77
Copia-1_DFi-I	2.77
(AGCAAGT)n	2.76
(TGTCGAGGA)n	2.76
(ATATTTG)n	2.75
(ATTACATTA)n	2.75
(TGTATTC)n	2.75
(TTAATTG)n	2.74
Jockey-2_DSim	2.74
(AATCAT)n	2.73
(AATGCTGA)n	2.73
(AGAAT)n	2.73
(ATTTAT)n	2.73
(GTTAT)n	2.73
Gypsy5-I_Dpse	2.73
(AAAAAAC)n	2.71
(AATATGT)n	2.71
(GCTGCTCCT)n	2.71
(TTATTAG)n	2.71
BEL-4_DEu-I	2.71
(CCACCGAT)n	2.7
(GCGCGA)n	2.69
(TTGGCCAC)n	2.69
(AAATGGC)n	2.68
(CATCCGC)n	2.68
(AATAATT)n	2.67
(AATTCG)n	2.67
(AATTGTA)n	2.67
(ACGGACAT)n	2.67
(ACGGAGG)n	2.67
(ACTAAT)n	2.67
(ATTAGT)n	2.67
(CTATG)n	2.67
(GATATTT)n	2.67
Gypsy-2_DRh-LTR	2.67
TLD2	2.67
Jockey-3_DBp	2.66
(CTTAA)n	2.65
(GATTCTC)n	2.65
(GCCTGG)n	2.65
(AAGCCCCG)n	2.64
(CGCCAA)n	2.64
(GATAA)n	2.64
(TTAGTA)n	2.64
(ATTGGGC)n	2.63
(GGTCGGAG)n	2.63
(TGAGGA)n	2.63
(TTACATA)n	2.63
1pt688.Contig9_locus	2.63
(ATACAGT)n	2.62
(CAGTGTC)n	2.62
(TATGTTA)n	2.62
(GGATATG)n	2.61
(TGCAGGC)n	2.61
Gypsy-60_DWil-I	2.61
(ATATATAC)n	2.6
(CCGTTA)n	2.6
(CTGTGTGGT)n	2.6
(TAATAAG)n	2.6
(TACTAGT)n	2.6
(TATTGGC)n	2.6
Mariner-4_DRh	2.6
(CGCC)n	2.59
(AACCTAA)n	2.58
(GTGTTTTT)n	2.58
(TAATTG)n	2.58
(TTTGATT)n	2.58
(TAATGTTAA)n	2.57
(TATAATC)n	2.57
(AACTTA)n	2.56
(AGCGAAA)n	2.56
(ATCCAAA)n	2.56
(CTCCTT)n	2.56
(GACAGGA)n	2.56
(GGGACG)n	2.56
BEL-1_DTa-I	2.56
(AACCCGA)n	2.55
(CCCAGAC)n	2.55
(GCCCGAA)n	2.55
(TTCTGTG)n	2.55
(CATTAT)n	2.54
(CTTCCC)n	2.54
(CTTTTCC)n	2.54
(TCTTGGGTTC)n	2.54
(TGGTCGT)n	2.54
(AACACCC)n	2.53
(GCTGTTA)n	2.53
(TATTTGC)n	2.53
cen_Y_island	2.53
(AATATTG)n	2.5
(AATGTT)n	2.5
(AGTTTTA)n	2.5
(ATAGTAT)n	2.5
(CCAGAAACCA)n	2.5
(TAATGTC)n	2.5
(TTTAGC)n	2.5
CR1-5_DT	2.5
Copia_LTR	2.49
(GAAACG)n	2.48
(GTTCTCT)n	2.48
(TGCGCGT)n	2.48
(TTTAATT)n	2.48
Gypsy-12_DRh-LTR	2.48
(AATATC)n	2.47
(GATAGA)n	2.47
(TATTCA)n	2.47
Baggins1	2.47
Gypsy-26_DEl-I	2.47
Jockey-1_DSi	2.47
(TGCATAC)n	2.46
(AGTGCC)n	2.45
(CCATCCC)n	2.45
(CCGGTTT)n	2.45
(CAAAAG)n	2.44
(CCCCCAT)n	2.44
(CCTACA)n	2.44
(GGCAAAAT)n	2.44
(TATCGT)n	2.44
(TTGGCCA)n	2.44
(AACTAAG)n	2.43
(CATCCTT)n	2.43
(CGGATAG)n	2.43
(GTTTCATA)n	2.43
MuDR-1_DK	2.43
(AGTATTT)n	2.42
(GTCAGTGA)n	2.42
(GTGTCCA)n	2.41
Jockey-1_DYa	2.41
(AATAATTA)n	2.4
(ACTACAT)n	2.4
(ATAAGA)n	2.4
(ATTCCAA)n	2.4
(ATTTTAA)n	2.4
(GTAGGTG)n	2.4
(TAAGAAT)n	2.4
(TAATTGA)n	2.4
(TACAAA)n	2.4
(TATTCAA)n	2.4
BEL-6_DYa-LTR	2.4
(CCCAGTAT)n	2.39
(ACTCCGA)n	2.38
(AGATT)n	2.38
(ATATAAT)n	2.38
(ATTACT)n	2.38
(CCGCA)n	2.38
(CTATT)n	2.38
(CTTCTCG)n	2.38
(GATGGGG)n	2.38
(TACTTA)n	2.38
(TCTGTAT)n	2.38
(TTATATA)n	2.38
(TTTTAGG)n	2.38
(ACCGCC)n	2.37
(GCACAGA)n	2.36
(GCGATCT)n	2.36
(TTATTCA)n	2.36
BEL-4_DRh-I	2.36
(ATTTGTA)n	2.35
(CCAATTC)n	2.35
(CGCCCC)n	2.35
(GAATCGC)n	2.35
Invader3_I-int	2.35
(AAGCAAC)n	2.33
(ACATTAT)n	2.33
(AGCTGAAAA)n	2.33
(CCACCCATCA)n	2.33
(CCCTTCT)n	2.33
(CCTTTTAG)n	2.33
(CGAGG)n	2.33
(GGGGGGA)n	2.33
(GTATTAT)n	2.33
(GTCTACT)n	2.33
(TCTGAAG)n	2.33
(TGTATAC)n	2.33
(TTTTAAC)n	2.33
CR1-3_DEl	2.33
(GGAGATC)n	2.32
(GTATCTGAAA)n	2.32
(TGTGGATA)n	2.32
Gypsy-15_DBp-I	2.32
(AAAGT)n	2.31
(ACCATATAT)n	2.31
(GTTCTCCA)n	2.31
(TGGTAGG)n	2.31
(GCCTGGTTC)n	2.3
Gypsy-20_DEl-I	2.3
(ATTATCA)n	2.29
(ATTCAGC)n	2.29
(CGTTCCC)n	2.29
(CTGGAGC)n	2.29
(TGGTGCA)n	2.29
(TTGTATA)n	2.29
Gypsy-41_DAn-I	2.29
(AATAGCA)n	2.27
(ACCTGGA)n	2.27
(CACTCCG)n	2.27
(TGAATAG)n	2.27
DNA4-1_DK	2.27
Gypsy-11_DBp-I	2.27
R1-2_DYa	2.27
(GGTCTT)n	2.26
(TTGCTCC)n	2.26
(ACTTTA)n	2.25
(AGAAAG)n	2.25
(AGATAAA)n	2.25
(AGGAT)n	2.25
(ATCGGAA)n	2.25
(CCACTTTT)n	2.25
(CTCGATCAG)n	2.25
(GCTCTCA)n	2.25
(GGCGTTG)n	2.25
(TAGTCCG)n	2.25
(TGAATACA)n	2.25
(TTACACT)n	2.25
(CAACTT)n	2.24
(CAGATCT)n	2.24
(GAGAAT)n	2.24
(GAGGAAT)n	2.24
(GTATCTC)n	2.24
(GTGCCA)n	2.24
(TCCAGTA)n	2.24
(TATATATG)n	2.23
Hoana1	2.23
(AATGATT)n	2.22
(CGCTG)n	2.22
(GCCAGTTG)n	2.22
ACCORD2_LTR	2.22
LOOPER1_DM	2.22
Transib-4_DBp	2.22
(AATTTC)n	2.21
(ACGGCTC)n	2.21
(ACTCCCG)n	2.21
(CAGTGGA)n	2.21
(CCTCC)n	2.21
(CGTCGAG)n	2.21
(CTACGGA)n	2.21
(CTGCTGC)n	2.21
(GCATCG)n	2.21
(TCCGAGA)n	2.21
(TGGGTGC)n	2.21
Gypsy-26_DYa-LTR	2.21
Gypsy-3_DRh-I	2.21
(CCATATC)n	2.2
(TTAAGA)n	2.2
(CAGAAACTC)n	2.19
(GCTGCTGCG)n	2.19
(GTAACG)n	2.19
(GTCCCTG)n	2.19
(TCAATGT)n	2.19
Copia-1_DSim-I	2.19
Gypsy5_LTR	2.19
(CTGATC)n	2.18
(GCGAACT)n	2.18
(GTTGTGG)n	2.18
(TAGTGTA)n	2.18
ROOA_I-int	2.18
(AGATTA)n	2.17
(ATCATA)n	2.17
(CAATAGT)n	2.17
(CTAAG)n	2.17
(GACTA)n	2.17
(TAGTTG)n	2.17
(CCGTCC)n	2.16
(CCTA)n	2.16
(TATACTC)n	2.16
(TCATAC)n	2.16
(TCCATCGCC)n	2.16
Gypsy13-LTR_Dya	2.16
(ATGTTGCC)n	2.15
(CCCGATT)n	2.15
(GCGATTG)n	2.15
Transib-6_DAn	2.15
(CCATCGC)n	2.14
(CCTTC)n	2.14
(GCATAT)n	2.14
(GCCTAC)n	2.14
(GGTGAGG)n	2.14
(TATAAG)n	2.14
(TATCAG)n	2.14
Gypsy-52_DEl-I	2.14
Gypsy-8_DRh-I	2.14
NOMAD_LTR	2.14
TIRANT_LTR	2.14
(ATCCCCA)n	2.13
(GTCCATTT)n	2.13
(TCGTC)n	2.13
DIVER2_I-int	2.13
Gypsy-24_DY-I	2.13
(AATGCTAA)n	2.12
(ATGTAAC)n	2.12
(GGAAGG)n	2.12
(TTGTAGA)n	2.12
Helitron-2_DF	2.12
(AACCATT)n	2.11
(ATCCTTC)n	2.11
(CCCACCC)n	2.11
(CGGACTA)n	2.11
(CTCCCAC)n	2.11
(TAGTAGAG)n	2.11
Copia1-LTR_Dmoj	2.11
Nobel_LTR	2.11
(AAAGAA)n	2.1
(AATACT)n	2.1
(AGCCCGG)n	2.1
BEL-22_DAn-I	2.1
Gypsy-30_DWil-I	2.1
Gypsy-7_DVir-LTR	2.1
(CCCACTA)n	2.09
(CCCCAG)n	2.09
(CCGGATC)n	2.09
(GGAG)n	2.09
(TATTTGT)n	2.09
CIRCE	2.09
Gypsy12_I-int	2.09
(AAATAT)n	2.08
(AATAGT)n	2.08
(AGCCGT)n	2.08
(ATCCCAG)n	2.08
(TAATTAA)n	2.08
(TATGGATA)n	2.08
(TCCCGACTT)n	2.08
(TCCGAAG)n	2.08
(TTTTCGGA)n	2.08
BEL-8_DMo-I	2.08
EnSpm-1_DF	2.08
(CTCCTCA)n	2.07
(TCCAATT)n	2.07
(TGGCCAC)n	2.07
Gypsy6_I-int	2.07
(ATAAGTG)n	2.06
(ATACCCT)n	2.06
(GTCGGTG)n	2.06
(TATGAA)n	2.06
Gypsy-25_DYa-I	2.06
Gypsy-2_DSe-LTR	2.06
(CAACTGG)n	2.05
(CATAAA)n	2.05
(CCGAGTC)n	2.05
(TGTGTATC)n	2.05
(TTATTAT)n	2.05
(TTTCATT)n	2.05
G7_DM	2.05
Gypsy-2_DAn-I	2.05
(ACAGACCAG)n	2.04
(ACCCCTG)n	2.04
(GTGGGAG)n	2.04
(TAAGA)n	2.04
(TCCGGAT)n	2.04
(TTATGATA)n	2.04
(AATATAA)n	2.03
(AGTTCG)n	2.03
(ATAG)n	2.03
(TTGGCTTGGA)n	2.03
Jockey-2_DAn	2.03
(TTACT)n	2.02
(TTTTCGA)n	2.02
Gypsy-24_DYa-I	2.02
(TCTTA)n	2.01
(TTTTTCG)n	2.01
Chimpo_LTR	2.01
(AAAAGCGG)n	2
(AAATAAT)n	2
(AAATCC)n	2
(AACTGGG)n	2
(AAGTAA)n	2
(AAGTACA)n	2
(AATCCTT)n	2
(ACAGAAG)n	2
(ACTCTA)n	2
(ACTTA)n	2
(AGAACCC)n	2
(AGATTAA)n	2
(ATAAGAT)n	2
(ATATTTAT)n	2
(ATGATGA)n	2
(ATTACCA)n	2
(ATTTCGG)n	2
(CACCTTT)n	2
(CATCCCAG)n	2
(CATTA)n	2
(CATTTTA)n	2
(CCATTAT)n	2
(CCCT)n	2
(CGAATAG)n	2
(CGATGGA)n	2
(CGTTTTG)n	2
(CTCGGAT)n	2
(CTTAAT)n	2
(CTTTATA)n	2
(GAATTCA)n	2
(GAGATGA)n	2
(GGACCG)n	2
(GGAGG)n	2
(GGTGGG)n	2
(TAAACG)n	2
(TAATAC)n	2
(TAATCTG)n	2
(TATCAA)n	2
(TATTAAAAG)n	2
(TATTCTA)n	2
(TCAAAA)n	2
(TCACTG)n	2
(TCTAG)n	2
(TGAATGAG)n	2
(TTCATAA)n	2
(TTTATTC)n	2
Gypsy-20_DTa-I	2
Gypsy13-I_Dya	2
hAT-5N1_DK	2
Gypsy1-I_DM	1.99
(GTGGTGCGAG)n	1.98
Copia-3_DWil-I	1.98
(CATTCT)n	1.97
(GTATCGGATC)n	1.97
M4DM	1.97
MICROPIA_I-int	1.97
hAT-2_DSe	1.97
(AAACAT)n	1.96
(ACAATCG)n	1.96
(ATAAGCG)n	1.96
(CACTTAC)n	1.96
(CTTCTTT)n	1.96
(GCAGCGA)n	1.96
Gypsy-10_DMoj-LTR	1.96
dmel_rDNA_ITS2	1.96
(AATTCAC)n	1.95
(ATCCCCAG)n	1.95
(CAGTTAGT)n	1.95
(GCTCCTCCA)n	1.95
(GGCCCTT)n	1.95
(TCTTCGT)n	1.95
(GGGGAAA)n	1.94
(TAGCT)n	1.94
(TGGGCTC)n	1.94
(TGTCAT)n	1.94
(TTGGTA)n	1.94
MAR_DW	1.94
(AAATCA)n	1.93
(ACCTTTC)n	1.93
(ACTTTTA)n	1.93
(CCTGC)n	1.93
(TAATTTC)n	1.93
(TCTCGGC)n	1.93
Gypsy-11_DVir-I	1.93
piggyBac-1_DEu	1.93
(CCGGGT)n	1.92
(CTGCGAA)n	1.92
(TGTCGGC)n	1.92
BEL-1_DRh-LTR	1.92
Gypsy-56_DWil-I	1.92
Gypsy11-I_Dpse	1.92
I-4_DBi	1.92
Outcast-1_DEu	1.92
(AAAATCG)n	1.91
(CAGGATG)n	1.91
(CGAGATGCC)n	1.91
(CTGTGGA)n	1.91
(GAGATCA)n	1.91
BEL-6_DYa-I	1.91
Gypsy-15_DEl-I	1.91
Invader3_LTR	1.91
(AATATAT)n	1.9
(CAGGATGC)n	1.9
(CCCCCG)n	1.9
(GATGCTA)n	1.9
(ACCCTTG)n	1.89
(CCACCTC)n	1.89
(CCATTCT)n	1.89
(CGTTTTT)n	1.89
(GAAAAG)n	1.89
(GAGTCGG)n	1.89
(GATGTATG)n	1.89
(GTGGATCA)n	1.89
(TCCAGAG)n	1.89
(TGACGTA)n	1.89
(TTATTA)n	1.89
DM1731_LTR	1.89
Gypsy-9_DEl-I	1.89
Homo2	1.89
Invader1_I-int	1.89
(ACATGACATT)n	1.88
(ATCAC)n	1.88
(ATTATCG)n	1.88
(CAAGAGC)n	1.88
(CCAAAACCAC)n	1.88
(CCATCCG)n	1.88
(CTATCG)n	1.88
(GCCAGGA)n	1.88
(GGATCTT)n	1.88
(GTGGGGCG)n	1.88
BEL-5_DFi-I	1.88
Mariner-5_DRh	1.88
(AACTCGG)n	1.87
(CTGAACA)n	1.87
(GAGCC)n	1.87
(TAAATA)n	1.87
(TTTATTT)n	1.87
(AACTCCG)n	1.86
(AATATCA)n	1.86
(ACCTAACA)n	1.86
(ATAGCC)n	1.86
(CCCATGTC)n	1.86
(CCCTCAT)n	1.86
(CCGGAGT)n	1.86
(CTGTG)n	1.86
(GACGAC)n	1.86
(GCCAAAA)n	1.86
(GGACCAA)n	1.86
(GTAGCTG)n	1.86
(TTATCA)n	1.86
(ATAGG)n	1.85
(ATAGGT)n	1.85
(GACAAC)n	1.85
(GCCTGGT)n	1.85
(GCTCCTGT)n	1.85
(GGAA)n	1.85
(GGGATCT)n	1.85
(TTGAGC)n	1.85
(TTTATAA)n	1.85
(AGCGGAA)n	1.84
(ATTCT)n	1.84
(CTCCAGTAC)n	1.84
(GGACTG)n	1.84
(TGGTGGTGC)n	1.84
R1-2_DM	1.84
(AATATAG)n	1.83
(ACACAGAT)n	1.83
(ACTACC)n	1.83
(CAATACA)n	1.83
(GGAGT)n	1.83
(GTAACTA)n	1.83
(TAATACA)n	1.83
(TAATCAAT)n	1.83
(TATTA)n	1.83
(TTCGTA)n	1.83
(TTGACAA)n	1.83
Gypsy-21_DAn-I	1.83
(AGTTAT)n	1.82
(CAACCAG)n	1.82
(CAACGAA)n	1.82
(GGACCCC)n	1.82
(TTTTGTATG)n	1.82
G5_DM	1.82
Gypsy-2_DSe-I	1.82
R2_DSi	1.82
(AAGAAGC)n	1.81
(ACACCACC)n	1.81
(ACCACACAG)n	1.81
(ACCCTC)n	1.81
(AGTAC)n	1.81
(ATAATT)n	1.81
(ATACAAT)n	1.81
(ATGGAGG)n	1.81
(CCCGGTT)n	1.81
(GAAGCGA)n	1.81
(GAGTCCT)n	1.81
(GGGGTGC)n	1.81
(TGAGCT)n	1.81
Jockey-6_DEu	1.81
MICROPIA_LTR	1.81
(CGGTCTT)n	1.8
(CTGAC)n	1.8
(CTGCCCT)n	1.8
(CTGGTAG)n	1.8
(GGTATA)n	1.8
(TAGTACT)n	1.8
(TGAGATA)n	1.8
(TTACAAT)n	1.8
CR1-8_DTa	1.8
Gypsy-25_DAn-I	1.8
Gypsy-27_DBp-I	1.8
Gypsy-59_DWil-I	1.8
Harbinger-1_DRh	1.8
hAT-2_DK	1.8
(ACCAGAC)n	1.79
(ATAATAT)n	1.79
(ATACATA)n	1.79
(GGATTCCCC)n	1.79
(GTATCCAA)n	1.79
(TGCCCGT)n	1.79
BEL-2_DBp-I	1.79
Copia-2_DEl-I	1.79
Gypsy-25_DEl-I	1.79
Gypsy-6_DPer-I	1.79
MuDR-1_DEl	1.79
R1-5_DK	1.79
(AAGGAAC)n	1.78
(AATGG)n	1.78
(AGATTT)n	1.78
(CAACACC)n	1.78
(CC)n	1.78
(CGGTGG)n	1.78
(GATATA)n	1.78
(GCCACTT)n	1.78
(GCCCTG)n	1.78
(GTCCGGT)n	1.78
(TAATATA)n	1.78
(TCCGACA)n	1.78
(TGTAGTC)n	1.78
(TTCCTG)n	1.78
BS3_DM	1.78
Hoyak3	1.78
Transib5	1.78
cen_X_island	1.78
(AATAAAT)n	1.77
(AATTTTC)n	1.77
(AATTTTT)n	1.77
(CCGTATC)n	1.77
(GATCGAA)n	1.77
(TACT)n	1.77
(TGCCAG)n	1.77
(TGGGGAA)n	1.77
(TTAAGC)n	1.77
(TTAGCTT)n	1.77
MuDR-1_DF	1.77
(AAACGT)n	1.76
(ATTCAT)n	1.76
(GTCTGTCC)n	1.76
(TCCGTAA)n	1.76
(TCCTGGCA)n	1.76
(TTTAGATA)n	1.76
CR1-2_DK	1.76
Gypsy-17_DRh-I	1.76
Gypsy-18_DAn-I	1.76
Gypsy-28_DYa-LTR	1.76
Gypsy-4_DSe-I	1.76
(AAATATA)n	1.75
(AACCACT)n	1.75
(AATTCTT)n	1.75
(ACACAGA)n	1.75
(AGGGGCA)n	1.75
(AGTGGGC)n	1.75
(CAGTAA)n	1.75
(CTCCTGG)n	1.75
(CTTAAA)n	1.75
(GAGTATA)n	1.75
(GATTCGG)n	1.75
(GGACGAG)n	1.75
(GTGCAAT)n	1.75
(TATGTAT)n	1.75
(TGATGTT)n	1.75
(TGGGGTC)n	1.75
(TTAACGA)n	1.75
(TTCATAT)n	1.75
FB4_DM	1.75
Gypsy-14_DTa-I	1.75
(AATGAC)n	1.74
(ATGTTTT)n	1.74
(CAGCCCA)n	1.74
(CAGTA)n	1.74
(CTATTC)n	1.74
(CTCTCCCTCT)n	1.74
(CTGCTTG)n	1.74
(GAAATGCT)n	1.74
BEL2-I_Dmoj	1.74
Gypsy-7_DSim-LTR	1.74
Gypsy_6B	1.74
(ATATC)n	1.73
(CGGCAG)n	1.73
(CTACA)n	1.73
(GATA)n	1.73
(GCGGAA)n	1.73
(GGACTTC)n	1.73
(TGATTTT)n	1.73
(TGCCTA)n	1.73
(TGGAGTA)n	1.73
(TGGTTGG)n	1.73
(TTCTA)n	1.73
BEL-15_DTa-I	1.73
BEL-2_DSe-I	1.73
Gypsy-1_DSim-I	1.73
Gypsy-2_DBp-I	1.73
Gypsy-46_DEl-LTR	1.73
(ACTATT)n	1.72
(AGTAGC)n	1.72
(ATATATA)n	1.72
(CGTTCGC)n	1.72
(GAATCGA)n	1.72
(TCGGGAA)n	1.72
(TGAGGCA)n	1.72
(TTGTTGG)n	1.72
DMR_DV	1.72
Gypsy-6_DSe-LTR	1.72
(AAGTTT)n	1.71
(AAGTTTG)n	1.71
(ACACTTTTA)n	1.71
(CCGTCCAA)n	1.71
(CCTACCA)n	1.71
(CGGTTA)n	1.71
(CTGGCAAA)n	1.71
(GCCGTG)n	1.71
(GGCTTAG)n	1.71
(GTAGA)n	1.71
(TCCTCCG)n	1.71
(TTATTTA)n	1.71
(TTTTATA)n	1.71
BEL-3_DVir-I	1.71
CR1-2_DT	1.71
(AATAATA)n	1.7
(AATTATGT)n	1.7
(CGTGCAC)n	1.7
(CTGGCG)n	1.7
(TATTTTT)n	1.7
(TGAGCC)n	1.7
(TGAGTATTG)n	1.7
(TGGGTGGA)n	1.7
Gypsy-3_DKi-I	1.7
Gypsy2-I_DV	1.7
(AACAT)n	1.69
(AGGTAGT)n	1.69
(ATTTATT)n	1.69
(CAACCTG)n	1.69
(CCATATT)n	1.69
(GAACAGC)n	1.69
(GGCAATG)n	1.69
(TCTCGC)n	1.69
(TCTGGCC)n	1.69
(TTTCGAC)n	1.69
Gypsy-31_DWil-I	1.69
(ACGA)n	1.68
(ACTACCA)n	1.68
(ATAAT)n	1.68
(ATTAT)n	1.68
(ATTCTGG)n	1.68
(CGCATA)n	1.68
(GATTTA)n	1.68
(GGATTCAA)n	1.68
(GGCAAGAAG)n	1.68
(GGTGA)n	1.68
(GTAAATC)n	1.68
(TCGCCT)n	1.68
(TGGCTATC)n	1.68
(TTCGGC)n	1.68
Gypsy-10_DSim-I	1.68
Gypsy10-I_Dpse	1.68
Jockey-1_DEr	1.68
(AATGAAT)n	1.67
(ACACTCA)n	1.67
(ACTAAA)n	1.67
(AGAGTTG)n	1.67
(CAAGTTA)n	1.67
(CCAGGACCAC)n	1.67
(CGACGT)n	1.67
(CTAGATA)n	1.67
(CTATTAA)n	1.67
(CTGGATGC)n	1.67
(GCTATTT)n	1.67
(GGCAAGT)n	1.67
(GGGGCT)n	1.67
(GGTCCAT)n	1.67
(TATATTTA)n	1.67
(TGATATA)n	1.67
(TGCTGTTGC)n	1.67
(TTTTAAG)n	1.67
(TTTTGAA)n	1.67
BEL-20_DTa-I	1.67
Gypsy-15_DAn-I	1.67
PROTOP	1.67
(ATGTGGAACT)n	1.66
(CCAGGACGCG)n	1.66
(CCATCCTG)n	1.66
(CGAACAT)n	1.66
(GCATTCG)n	1.66
(GCCGAG)n	1.66
(GGTATG)n	1.66
(GTGCAT)n	1.66
(TCGATCT)n	1.66
(TGCTGCTGT)n	1.66
(TGGCTTTC)n	1.66
(TTA)n	1.66
DM297_I-int	1.66
Gypsy-28_DAn-I	1.66
Gypsy6A_LTR	1.66
LOA-2_DGri	1.66
MuDR-1_DT	1.66
(AAGTTGC)n	1.65
(AATAGAG)n	1.65
(AGGCAC)n	1.65
(CACGTC)n	1.65
(CCGAGAC)n	1.65
(GCCAGTT)n	1.65
(GTATCTGA)n	1.65
(GTGTGGA)n	1.65
(TATTTA)n	1.65
(TCACAGA)n	1.65
(TGCTCG)n	1.65
(TGTGTCT)n	1.65
(TTACGA)n	1.65
(TTCACAG)n	1.65
(TTCTATT)n	1.65
(TTTATA)n	1.65
(AATATTT)n	1.64
(ACCGACCA)n	1.64
(ACTGACA)n	1.64
(AGAAGGCTG)n	1.64
(CATCCTTGC)n	1.64
(CATTTAA)n	1.64
(CCCATGC)n	1.64
(CTCACG)n	1.64
(GCACTAAG)n	1.64
(GCCTCC)n	1.64
(GGAACGG)n	1.64
(GGTCCCGGT)n	1.64
(TACGAA)n	1.64
(TGGGGAC)n	1.64
(TTTAAT)n	1.64
S_DM	1.64
(ATGGGA)n	1.63
(CCGTTG)n	1.63
(GAGGACT)n	1.63
(GATGCCC)n	1.63
(GCCACCTA)n	1.63
(GGAGATG)n	1.63
(GGAGCAT)n	1.63
(GGTGGATTC)n	1.63
(GTTGTCT)n	1.63
(TATTTGGA)n	1.63
(TGTCTTTG)n	1.63
cen_4_island	1.63
(AAGCCAG)n	1.62
(ACCTCTG)n	1.62
(AGATTGC)n	1.62
(ATGCA)n	1.62
(ATTTAAC)n	1.62
(CATCAGA)n	1.62
(CTCCCGT)n	1.62
(CTTAAG)n	1.62
(GACCCG)n	1.62
(GCAAAAT)n	1.62
(GCAGCAGGA)n	1.62
(GCATGCT)n	1.62
(GCCCC)n	1.62
(GCCCT)n	1.62
(GCGCAG)n	1.62
(GCTCCGG)n	1.62
(GGGCTT)n	1.62
ACCORD_LTR	1.62
Gypsy-20_DBp-I	1.62
Gypsy-22_DYa-I	1.62
(AAAACCG)n	1.61
(AATATA)n	1.61
(ACCATAG)n	1.61
(AGGAAT)n	1.61
(CAACTAC)n	1.61
(CCATAG)n	1.61
(CCGACAA)n	1.61
(CTGAGG)n	1.61
(CTTCCCG)n	1.61
(GAGCAC)n	1.61
(GATGTC)n	1.61
(GCCAGTA)n	1.61
(GGGAGT)n	1.61
(GTCAGGAC)n	1.61
(TACTGG)n	1.61
(TGGTTGT)n	1.61
(TGTTAC)n	1.61
(TTCTCC)n	1.61
(TTGTGAG)n	1.61
(TTTCTAT)n	1.61
(AACATAT)n	1.6
(AAGTCA)n	1.6
(AATAATC)n	1.6
(ACTCCGG)n	1.6
(AGCCGC)n	1.6
(AGTAA)n	1.6
(ATTCAGG)n	1.6
(CACACACC)n	1.6
(CACCTCC)n	1.6
(CACTTAA)n	1.6
(CCCAGTA)n	1.6
(CCTTTTC)n	1.6
(CTGGCGGG)n	1.6
(GAGGGG)n	1.6
(GATTGGT)n	1.6
(TACAGCA)n	1.6
(TCCAGAA)n	1.6
(TCCGTG)n	1.6
(TCGCAAT)n	1.6
(TGGTCCAA)n	1.6
(TTCTCAGT)n	1.6
(TTGGCAT)n	1.6
Chouto_I-int	1.6
Gypsy-3_DBi-LTR	1.6
(AAGAGCA)n	1.59
(ACGCACC)n	1.59
(CTCCTGC)n	1.59
(GAGACA)n	1.59
(GGAGCTA)n	1.59
(GGCACTCT)n	1.59
(GTTTTTT)n	1.59
(TGCTGTA)n	1.59
(TTCCAGC)n	1.59
(TTCGTTT)n	1.59
(TTTGCCA)n	1.59
Gypsy-33_DEl-I	1.59
Gypsy-45_DWil-I	1.59
Gypsy3_I-int	1.59
Invader4_LTR	1.59
(AAGGA)n	1.58
(AAGTGA)n	1.58
(AATACAG)n	1.58
(AGCAGCC)n	1.58
(ATATGCC)n	1.58
(ATGAAA)n	1.58
(ATGGTAG)n	1.58
(CACCACT)n	1.58
(CCAACAT)n	1.58
(CCAGTGCCAT)n	1.58
(GAGGG)n	1.58
(GCTGCTGA)n	1.58
(GGCCAA)n	1.58
(TAT)n	1.58
(TTTGTGG)n	1.58
Copia1-LTR_DM	1.58
Gypsy-21_DBp-I	1.58
Gypsy-2_DRh-I	1.58
Gypsy-8_DSim-I	1.58
Jockey-12_DBp	1.58
Transib-2_DAn	1.58
(ATATATT)n	1.57
(ATTAGAC)n	1.57
(CGGGAG)n	1.57
(CGGGCAA)n	1.57
(GAATGCT)n	1.57
(GACTCCG)n	1.57
(GATCGAC)n	1.57
(TACAGAT)n	1.57
(TCTGGGA)n	1.57
(TGCGAC)n	1.57
(TGGGTC)n	1.57
Bica_LTR	1.57
Copia-1_DSim-LTR	1.57
Jockey-4_DYa	1.57
Rsp_SAT	1.57
(AGAGCTC)n	1.56
(AGGTGGA)n	1.56
(CAGATACT)n	1.56
(CATATT)n	1.56
(CCCCTCA)n	1.56
(CTGCAGA)n	1.56
(GCTGTC)n	1.56
(GGGTGCT)n	1.56
(GGTGCCG)n	1.56
(GTCCGTTT)n	1.56
(TACCAGC)n	1.56
(TATACG)n	1.56
(TATAGG)n	1.56
(TATCTA)n	1.56
(TCTCCTG)n	1.56
(TGCCTCG)n	1.56
(TGCTACT)n	1.56
Gypsy-13_DRh-I	1.56
Gypsy-21_DEl-LTR	1.56
Gypsy-27_DYa-LTR	1.56
HELENA_RT	1.56
Polinton-1_DY	1.56
R1-3_DYa	1.56
TRANSIB1	1.56
(AATTAA)n	1.55
(ACCTTGC)n	1.55
(ATACAG)n	1.55
(CAGCCACC)n	1.55
(CCGAACCA)n	1.55
(CTCTCTT)n	1.55
(G)n	1.55
(GGGAGCG)n	1.55
(GTCTTG)n	1.55
(TACTA)n	1.55
(TGCAACC)n	1.55
(TGGATAC)n	1.55
(TGTCTCC)n	1.55
(TTACAT)n	1.55
CR1-1_DF	1.55
Gypsy-3_DSim-I	1.55
Gypsy15-I_Dpse	1.55
Jockey-10_DY	1.55
NOMAD_I-int	1.55
(ATTATGC)n	1.54
(ATTGAC)n	1.54
(CAGCTCA)n	1.54
(CCCATCC)n	1.54
(CGACTC)n	1.54
(CTCGCCA)n	1.54
(GACCGA)n	1.54
(GCAGAGA)n	1.54
(GGACAG)n	1.54
(TCCAACA)n	1.54
(TCTCCGT)n	1.54
(TGGGACAA)n	1.54
(TTTTTCA)n	1.54
Gypsy-13_DAn-I	1.54
Gypsy-42_DWil-LTR	1.54
Transib-3_DF	1.54
Transib-7_DRh	1.54
(ATAATGA)n	1.53
(ATTTTTT)n	1.53
(CACACCA)n	1.53
(CACACCG)n	1.53
(CAGGACA)n	1.53
(CAGTAC)n	1.53
(CATGAT)n	1.53
(CCGCCCC)n	1.53
(CCTCTTG)n	1.53
(CGACCTA)n	1.53
(CGCAGT)n	1.53
(CGCCTGT)n	1.53
(CTCTCGT)n	1.53
(CTGATA)n	1.53
(GCCTTC)n	1.53
(GCTCAT)n	1.53
(GGCCG)n	1.53
(TACAGT)n	1.53
BEL-2_DAn-I	1.53
DMLTR5	1.53
Invader2_I-int	1.53
Jockey-2_DEu	1.53
(AACCCC)n	1.52
(AACTAG)n	1.52
(AATTATA)n	1.52
(ACCCCTCA)n	1.52
(AGCTGGT)n	1.52
(ATATTG)n	1.52
(ATGGAGGC)n	1.52
(CAGACGA)n	1.52
(CCATGTT)n	1.52
(CCTCTA)n	1.52
(CCTCTGT)n	1.52
(CCTGCCA)n	1.52
(CCTGGAT)n	1.52
(GAATGTG)n	1.52
(GCAACATGA)n	1.52
(GGACTCT)n	1.52
(GTTGCCGTT)n	1.52
(TCGTAA)n	1.52
(TTTGGAC)n	1.52
Copia-1_DWil-I	1.52
Gypsy-63_DWil-I	1.52
Jockey-9_DF	1.52
Polinton-2_DK	1.52
hAT-1_DP	1.52
piRNA_cluster_flamenco	1.52
(AATTTT)n	1.51
(ACATGCA)n	1.51
(ATACTAG)n	1.51
(ATATTTT)n	1.51
(ATCCGTG)n	1.51
(CCTAAT)n	1.51
(CTTTAA)n	1.51
(GACATGGAG)n	1.51
(GGCGTGG)n	1.51
(GGTTGT)n	1.51
(TATTATT)n	1.51
(TGCCG)n	1.51
(TGTGTTT)n	1.51
Gypsy5-LTR_Dya	1.51
QUASIMODO_I-int	1.51
R1A_DAn	1.51
(ACCTCCG)n	1.5
(ACTAGT)n	1.5
(AGAA)n	1.5
(AGTTCTA)n	1.5
(ATATA)n	1.5
(ATATGTACA)n	1.5
(ATCTT)n	1.5
(ATTCCGG)n	1.5
(ATTTATAT)n	1.5
(CAATTCT)n	1.5
(CACCACG)n	1.5
(CCAGAGCT)n	1.5
(CCAGTCG)n	1.5
(CCCAAAA)n	1.5
(CCCCCCA)n	1.5
(CCTGTGT)n	1.5
(CGGTACT)n	1.5
(CTCAGG)n	1.5
(CTCCACA)n	1.5
(GAAGG)n	1.5
(GAGCCC)n	1.5
(GCCGATG)n	1.5
(GGCGAGT)n	1.5
(GTCCACC)n	1.5
(GTTTAA)n	1.5
(TAAAGTT)n	1.5
(TATACAT)n	1.5
(TCACTCA)n	1.5
(TTATAG)n	1.5
(TTATTATA)n	1.5
(TTTCCGAT)n	1.5
Gypsy-8_DPer-LTR	1.5
Harbinger-N1_DPe	1.5
Jockey-4_DBp	1.5
ROO_LTR	1.5
TRANSPAC_I-int	1.5
cen_2_island	1.5
(AACAAGG)n	1.49
(AGACAGC)n	1.49
(AGATAA)n	1.49
(AGTCCAG)n	1.49
(ATGAAT)n	1.49
(CCACCCCC)n	1.49
(GAGAACG)n	1.49
(TGGATTC)n	1.49
(TGTTATTCTA)n	1.49
ACCORD2_I-int	1.49
DIVER2_LTR	1.49
Gypsy-6_DGri-I	1.49
(AATTTTA)n	1.48
(ATGTCG)n	1.48
(CAACCAT)n	1.48
(CACTGG)n	1.48
(CATCCCGG)n	1.48
(CATCGT)n	1.48
(CGTGTC)n	1.48
(CTCAGGT)n	1.48
(GAGCCA)n	1.48
(GCAGGCT)n	1.48
(GCCCAGTT)n	1.48
(GCCGCG)n	1.48
(GGCTCG)n	1.48
(GGGAAGAGAG)n	1.48
(GGTGTTT)n	1.48
(GTCTCCT)n	1.48
(GTTCTGT)n	1.48
(TAATTTT)n	1.48
(TATCATT)n	1.48
(TCGATG)n	1.48
(TGCTGCGCC)n	1.48
Gypsy14-I_Dpse	1.48
Gypsy20-I_Dya	1.48
Transib-7_DBi	1.48
hAT-4_DK	1.48
(ATCTAGT)n	1.47
(CAGCATCAT)n	1.47
(CAGGTGG)n	1.47
(CCAAACA)n	1.47
(CGGGG)n	1.47
(GCAGTCC)n	1.47
(GGAGAGT)n	1.47
(GGATCTAA)n	1.47
(TAACCCC)n	1.47
(TCAGGT)n	1.47
(TCCGTGT)n	1.47
(TCCTCGA)n	1.47
(TGCCACCCAA)n	1.47
(TGTATAGTA)n	1.47
(TTTTTCACGA)n	1.47
GTWIN_I-int	1.47
Gypsy-6_DSe-I	1.47
(AAGTCGC)n	1.46
(AATAGG)n	1.46
(AATATT)n	1.46
(AGGACAA)n	1.46
(ATGTT)n	1.46
(ATTTTAT)n	1.46
(CAGAGAA)n	1.46
(CCGGATT)n	1.46
(CTGGGAA)n	1.46
(GAATA)n	1.46
(GATTACG)n	1.46
(GCAACATT)n	1.46
(GCATCCCG)n	1.46
(GGACTCC)n	1.46
(GGGATTG)n	1.46
(GTCCGG)n	1.46
(GTTTTAA)n	1.46
(TAATAT)n	1.46
(TACTTG)n	1.46
(TATATAT)n	1.46
(TATATTA)n	1.46
(TGTCCG)n	1.46
(TTTAGA)n	1.46
(TTTATGT)n	1.46
(TTTCGAT)n	1.46
Copia-2_DYa-I	1.46
Gypsy-12_DSim-I	1.46
Gypsy-18_DTa-I	1.46
Gypsy-9_DSim-LTR	1.46
Jockey-15_DBp	1.46
Jockey-7_DAn	1.46
P-1_DY	1.46
(ACTCGC)n	1.45
(ATACT)n	1.45
(ATCGAT)n	1.45
(ATGGGTG)n	1.45
(CCCGAG)n	1.45
(GGCTTTT)n	1.45
(GGGAGCAG)n	1.45
(GTCCTGA)n	1.45
(TACCT)n	1.45
(TTCTTAA)n	1.45
(TTGGTCCTT)n	1.45
(TTTTCTG)n	1.45
BEL_I-int	1.45
Gypsy-5_DEr-LTR	1.45
Gypsy-8_DVir-I	1.45
(AAGT)n	1.44
(AAGTGGA)n	1.44
(AATCATA)n	1.44
(AATGCCAA)n	1.44
(ACAGCCC)n	1.44
(ACTATAC)n	1.44
(AGAAAC)n	1.44
(AGCTTTG)n	1.44
(ATCAAT)n	1.44
(CAACCAC)n	1.44
(CACCAGCT)n	1.44
(CCAAAAG)n	1.44
(CCAGCTA)n	1.44
(CCTACC)n	1.44
(GAGCATCG)n	1.44
(GATCCCC)n	1.44
(GGATCT)n	1.44
(GGCGGA)n	1.44
(TAATCA)n	1.44
(TAGC)n	1.44
(TAGTATC)n	1.44
(TTGGAC)n	1.44
BEL-4_DBi-I	1.44
Copia_I-int	1.44
Homo8	1.44
Mariner-2_DT	1.44
(AAACCCG)n	1.43
(ACAGTAA)n	1.43
(ACCAACC)n	1.43
(ACCCCCC)n	1.43
(ACGACG)n	1.43
(AGTCTGC)n	1.43
(AGTTTT)n	1.43
(ATAACAT)n	1.43
(CAACCACC)n	1.43
(CAAGTT)n	1.43
(CAGTTCC)n	1.43
(CCGCAGC)n	1.43
(CGAGAGA)n	1.43
(CGTGCTT)n	1.43
(CTTAT)n	1.43
(GCCCA)n	1.43
(GGACCAT)n	1.43
(GGAGCTC)n	1.43
(GGCATTCT)n	1.43
(GTACTT)n	1.43
(TCCTGAG)n	1.43
(TGGCTCA)n	1.43
(TTATAT)n	1.43
(TTCTGAG)n	1.43
BEL-14_DAn-LTR	1.43
BLOOD_LTR	1.43
DNA3-1_DF	1.43
Gypsy-7_DWil-LTR	1.43
Transib1_DP	1.43
(AACCCGTAC)n	1.42
(AATCTCG)n	1.42
(ACTTCT)n	1.42
(AGCCATC)n	1.42
(ATATGGT)n	1.42
(CCCGAAT)n	1.42
(CCGAG)n	1.42
(CGGACG)n	1.42
(CGGTTTA)n	1.42
(CTGCTGG)n	1.42
(CTTGCAG)n	1.42
(CTTGGAGTT)n	1.42
(GAGATGG)n	1.42
(GATAAGT)n	1.42
(GCCTTT)n	1.42
(GGCAAACA)n	1.42
(GGTGGT)n	1.42
(TATATGA)n	1.42
(TGATTGT)n	1.42
(TGGCCGC)n	1.42
(TTCCATT)n	1.42
(TTGGATGTT)n	1.42
(TTTATT)n	1.42
(TTTGCTG)n	1.42
BEL-1_DBp-I	1.42
DOC3_DM	1.42
Gypsy-11_DSim-I	1.42
Gypsy-4_DSim-LTR	1.42
Helitron1_DM	1.42
I-1_DBp	1.42
Invader1_LTR	1.42
Jockey-1_DGri	1.42
piggyBac-1_DAn	1.42
(AAAGCCAG)n	1.41
(AAGGTCG)n	1.41
(ACACCC)n	1.41
(ACAGTA)n	1.41
(AGTCCAT)n	1.41
(ATTCGT)n	1.41
(CAGTGCC)n	1.41
(CATATGGT)n	1.41
(CCAGATG)n	1.41
(CCATTTG)n	1.41
(CGAAGGA)n	1.41
(GCCAGCC)n	1.41
(GGAGTAA)n	1.41
(TAATA)n	1.41
(TAGTTTT)n	1.41
(TCATGTT)n	1.41
(TCGCATT)n	1.41
(TGGTTAC)n	1.41
(TGTTGGT)n	1.41
(TTGGTGC)n	1.41
Gypsy-34_DEl-I	1.41
Gypsy-53_DEl-I	1.41
Mariner-3_DK	1.41
PROTOP_B	1.41
(ACAGCGGCA)n	1.4
(ACGCAGG)n	1.4
(ACGGAGT)n	1.4
(ACTCCAA)n	1.4
(ATAAA)n	1.4
(ATTCAA)n	1.4
(ATTGATA)n	1.4
(CATATCC)n	1.4
(CATTTAC)n	1.4
(CCACGCAT)n	1.4
(CCCACC)n	1.4
(CCCCAGT)n	1.4
(CTGGAAT)n	1.4
(GCCTTTG)n	1.4
(GTATA)n	1.4
(GTGTGGAT)n	1.4
(TAAT)n	1.4
(TAGTGG)n	1.4
(TCCACTG)n	1.4
(TCCCTA)n	1.4
(TGACCTT)n	1.4
(TGCCACT)n	1.4
(TGGGCATT)n	1.4
(TGTAAT)n	1.4
(TTAGTT)n	1.4
(TTCGGTT)n	1.4
(TTTAATG)n	1.4
(TTTCGTA)n	1.4
BEL-11_DEl-I	1.4
Copia1-I_Dpse	1.4
Gypsy-16_DRh-I	1.4
PROTOP_A	1.4
Transib-8_DAn	1.4
(ACACACAG)n	1.39
(ACACGGA)n	1.39
(ACCCAAG)n	1.39
(ACGGAA)n	1.39
(AGCCCCA)n	1.39
(AGTTCC)n	1.39
(ATATG)n	1.39
(ATCCTT)n	1.39
(ATGTA)n	1.39
(ATGTTATTCT)n	1.39
(ATTGAG)n	1.39
(C)n	1.39
(CAACTCC)n	1.39
(CCAATTT)n	1.39
(CCCCAGA)n	1.39
(CCCGATC)n	1.39
(CCGGAC)n	1.39
(CTATAC)n	1.39
(CTCCAGG)n	1.39
(CTTTAG)n	1.39
(CTTTTGG)n	1.39
(GAGCCCA)n	1.39
(GCATGG)n	1.39
(GCGGC)n	1.39
(GCTCAA)n	1.39
(GCTCGCT)n	1.39
(GTCGGC)n	1.39
(TATAT)n	1.39
(TCGGGA)n	1.39
(TCGGTGC)n	1.39
(TTCCT)n	1.39
(TTTCATA)n	1.39
Gypsy-1_DSim-LTR	1.39
Gypsy-26_DAn-I	1.39
Gypsy-52_DWil-I	1.39
HOBO	1.39
Mariner-7_DYa	1.39
(AAAAAT)n	1.38
(AGCTGC)n	1.38
(AGTTA)n	1.38
(AGTTTTAT)n	1.38
(ATA)n	1.38
(ATCCGGA)n	1.38
(ATT)n	1.38
(ATTAGAT)n	1.38
(ATTATTT)n	1.38
(ATTTAA)n	1.38
(CTATTTT)n	1.38
(CTGGGAG)n	1.38
(CTTTCA)n	1.38
(GAGTCCA)n	1.38
(GATCGCA)n	1.38
(GATTAG)n	1.38
(GCACTCCG)n	1.38
(GGACATT)n	1.38
(GGAGTGG)n	1.38
(TCTTTCC)n	1.38
(TGGCTC)n	1.38
(TGGGATGGTA)n	1.38
(TTCTGGA)n	1.38
(TTGCAGA)n	1.38
(TTGGCTT)n	1.38
BEL-2_DBi-LTR	1.38
DOC6_DM	1.38
Gypsy-12_DVir-LTR	1.38
Gypsy-1_DSe-LTR	1.38
I-1_DEl	1.38
TRANSIB4	1.38
(AAAATAC)n	1.37
(AACTGTT)n	1.37
(AATCCAAC)n	1.37
(AGAGAAG)n	1.37
(CATTTA)n	1.37
(CCTTTC)n	1.37
(CTCTTCT)n	1.37
(CTGGACA)n	1.37
(GAGAGG)n	1.37
(GCAACCA)n	1.37
(GGGTCC)n	1.37
(GTGCAA)n	1.37
(TAATGAA)n	1.37
(TATATT)n	1.37
(TCTAGCA)n	1.37
(TGAGGT)n	1.37
(TGGGGT)n	1.37
(TTTTTAG)n	1.37
BEL-3_DPer-I	1.37
DMCR1A	1.37
Gypsy-24_DBp-I	1.37
Gypsy17-I_Dpse	1.37
IVK_DM	1.37
TABOR_I-int	1.37
(AAGA)n	1.36
(ACACTAA)n	1.36
(ACACTGT)n	1.36
(ATTCCCC)n	1.36
(CAGTCTC)n	1.36
(CCACGT)n	1.36
(CCCAACCA)n	1.36
(CCGGCA)n	1.36
(CCTTTCT)n	1.36
(CGCAAT)n	1.36
(CGGGTCA)n	1.36
(CTGTTGCAT)n	1.36
(GGAATTGGGT)n	1.36
(GGAGCGG)n	1.36
(GGGAATCCG)n	1.36
(GTCGGTTG)n	1.36
(TAGAGA)n	1.36
(TATCATA)n	1.36
(TCCGGAA)n	1.36
(TGAGAA)n	1.36
(TGCATCCC)n	1.36
(TGGTAGC)n	1.36
(TTAC)n	1.36
(TTCATA)n	1.36
BEL-19_DAn-I	1.36
BEL-2_DSe-LTR	1.36
BEL-3_DYa-I	1.36
BEL-8_DPe-I	1.36
Helitron-5_DRh	1.36
Mariner-11_DAn	1.36
TABOR_DA-I	1.36
(AACAAGA)n	1.35
(AACTAA)n	1.35
(ACCCA)n	1.35
(ACCTCGC)n	1.35
(AGTAACG)n	1.35
(CAATTT)n	1.35
(CAGTCGG)n	1.35
(CCAGCTC)n	1.35
(CCAGGT)n	1.35
(CCCAC)n	1.35
(CCGCCC)n	1.35
(GAGCCAG)n	1.35
(GAGTTCT)n	1.35
(GCAG)n	1.35
(GCTTG)n	1.35
(GGATCGC)n	1.35
(GGGGAA)n	1.35
(GGTGGTGCA)n	1.35
(TCCTGGG)n	1.35
(TGAATGTT)n	1.35
(TTCAAT)n	1.35
(TTCCC)n	1.35
(TTCGATT)n	1.35
(TTGTAAT)n	1.35
BEL-13_DTa-I	1.35
FW_DM	1.35
G4_DM	1.35
Gypsy-26_DBp-I	1.35
Gypsy2_I-int	1.35
Gypsy4-I_Dya	1.35
(ACCGAT)n	1.34
(AGACTGC)n	1.34
(AGCTAA)n	1.34
(CCGAGGA)n	1.34
(CTCCAAG)n	1.34
(CTCTATG)n	1.34
(CTGGTT)n	1.34
(CTTA)n	1.34
(GACTTGG)n	1.34
(GAGACC)n	1.34
(GGACAGC)n	1.34
(GTAGCA)n	1.34
(TAAGTA)n	1.34
(TGCAGG)n	1.34
BEL-17_DEl-I	1.34
BEL-5_DAn-I	1.34
CR1-2_DRh	1.34
Gypsy-4_DBi-I	1.34
Gypsy-6_DRh-I	1.34
Jockey-8_DRh	1.34
R2_DM	1.34
(AAGAGAC)n	1.33
(ACATAA)n	1.33
(ACATACAA)n	1.33
(ACTAA)n	1.33
(AGAACTG)n	1.33
(AGAGGTC)n	1.33
(AGATACC)n	1.33
(AGCAAGG)n	1.33
(AGCTCAC)n	1.33
(AGGAGG)n	1.33
(ATTATGA)n	1.33
(ATTTACT)n	1.33
(CAGGACC)n	1.33
(CAGGGA)n	1.33
(CCCAGT)n	1.33
(CCCCACC)n	1.33
(CCTATG)n	1.33
(CCTTCAC)n	1.33
(CGAAAC)n	1.33
(CTCCCTC)n	1.33
(GAATAC)n	1.33
(GAGG)n	1.33
(GCCAAGC)n	1.33
(GCCCATG)n	1.33
(GGATACG)n	1.33
(GGTGGA)n	1.33
(GGTTCGA)n	1.33
(TATGGGTGGC)n	1.33
(TCCTGCCA)n	1.33
(TGTGTGCTG)n	1.33
(TTACCTA)n	1.33
(TTACGAA)n	1.33
(TTAGGTT)n	1.33
(TTAGTCAAT)n	1.33
(TTCATC)n	1.33
(TTGTCT)n	1.33
(TTTAG)n	1.33
(TTTGGCC)n	1.33
BEL-13_DP-I	1.33
Helitron-N2_DEl	1.33
TRANSIB2	1.33
(AAAG)n	1.32
(AAGCGA)n	1.32
(ACGGCA)n	1.32
(ACTGTA)n	1.32
(AGCATT)n	1.32
(AGTGGG)n	1.32
(ATCTCGC)n	1.32
(CTCCTCG)n	1.32
(CTGGCCATT)n	1.32
(CTGTCCG)n	1.32
(CTTTCG)n	1.32
(GAGCCAA)n	1.32
(GATGGAG)n	1.32
(GATGGCTA)n	1.32
(GCAAGTG)n	1.32
(GCTGGGTA)n	1.32
(GGAAATG)n	1.32
(GGAAT)n	1.32
(GGCAATT)n	1.32
(TAATCGT)n	1.32
(TACTT)n	1.32
(TGTTGGCCA)n	1.32
(TTAATT)n	1.32
(TTAATTT)n	1.32
(TTGGAG)n	1.32
(TTTTA)n	1.32
BEL-2_DVir-I	1.32
Gypsy-38_DAn-I	1.32
Gypsy-9_DRh-LTR	1.32
Gypsy24-LTR_Dpse	1.32
Gypsy5_I-int	1.32
Gypsy6_LTR	1.32
Gypsy_I-int	1.32
IDEFIX_I-int	1.32
(AAAAGG)n	1.31
(AAATGCA)n	1.31
(AAATGGG)n	1.31
(ACAAA)n	1.31
(AGGACGC)n	1.31
(AGTAAG)n	1.31
(ATAGAT)n	1.31
(CAAAAA)n	1.31
(CAAGTGC)n	1.31
(CCCCATG)n	1.31
(CCGATCCCAT)n	1.31
(GAATT)n	1.31
(GGGCGGT)n	1.31
(GGTGGCT)n	1.31
(GGTGGTT)n	1.31
(GTACT)n	1.31
(GTATTCA)n	1.31
(TCCGAG)n	1.31
(TGACGC)n	1.31
(TGCCCACCA)n	1.31
(TGGACTC)n	1.31
(TGTCCGCT)n	1.31
(TTTCTCA)n	1.31
(TTTTAAT)n	1.31
BLOOD_I-int	1.31
Gypsy-27_DYa-I	1.31
Gypsy1-I_Dya	1.31
Jockey-1_DAn	1.31
(AACATA)n	1.3
(ACAGGT)n	1.3
(ACTGAAC)n	1.3
(ACTGACAA)n	1.3
(AGCTACC)n	1.3
(ATCCGG)n	1.3
(ATTCTC)n	1.3
(CCAAGCCATT)n	1.3
(CCACACA)n	1.3
(CCCAAGCT)n	1.3
(CCCCA)n	1.3
(CCCGACC)n	1.3
[truncated: 8,047 more rows]

## Sheet: replicate 5
Figure 2-source data 3. Rhino ChIP-seq enrichment scores for all repeats in the genome. Data from (Mohn, et al. 2014; Zhang, et al. 2014; Parhad, et al. 2017).
#repeat	#chip/input(RPM)
(CTGTGTGGT)n	20
(TACTATA)n	17
(GTATTAA)n	16
Gypsy-6_DRh-LTR	13
(GGAGA)n	12.89
(GAGGA)n	12.83
(TCTCC)n	12.79
(ATCCCCC)n	11.81
piRNA_cluster_42AB	11.16
(ATTCTAT)n	11
(GGGCAATGG)n	10.57
(AGAGG)n	8.26
(AAATGAA)n	8
Gypsy-19_DTa-I	7.78
(CATGTCTTGT)n	7.77
(TAAGCTT)n	7.33
(CTTCCC)n	7.17
Invader6_LTR	7.17
(ATAACTC)n	7
(CGTCGTCGC)n	6.71
Gypsy8_I-int	6.43
(TCGGTAG)n	6.33
(TAGACAA)n	6.3
TART_B1	6.28
R1_DSi	6.09
NINJA_I-int	6.06
(AGAACAA)n	6
(GATTAT)n	6
(TACCATTT)n	6
(CTCTTTT)n	5.8
TART-A	5.74
(GCCTCTGCC)n	5.5
Copia-3_DBp-I	5.46
(ACTCCAT)n	5.31
MAX_I-int	5.3
DM1731_I-int	5.07
G_DM	5.02
(ACAGCCC)n	5
(GGAGCTGA)n	5
(TACAGCA)n	5
(TCTTTGG)n	5
(TGCACCACCC)n	5
(TTATCTTA)n	5
R1_DSe	4.84
(ATATCCGA)n	4.83
(TGCATAC)n	4.81
(ACTCCCG)n	4.8
MAX_LTR	4.71
(AGATAAA)n	4.67
(TACACAT)n	4.62
Invader6_I-int	4.58
(ATATTTAT)n	4.5
(ATTAAAT)n	4.5
(CCCCTTT)n	4.5
(TAGTATA)n	4.5
(TTTTATC)n	4.5
(TTCCAGC)n	4.45
(CCCCCAACTG)n	4.36
(CAGGCGCCAA)n	4.3
(GACCGAGAT)n	4.3
(GGTATCT)n	4.29
(CTTATTT)n	4.25
Copia-1_DSe-I	4.25
(ACTGAG)n	4.2
CR1-2_DEu	4.2
(CAATGTT)n	4.18
(TGACGTA)n	4.12
(AGCAGCC)n	4.11
HETA	4.09
R1-1_DSi	4.07
BATUMI_I-int	4.05
Gypsy-8_DFi-I	4.02
(AAACCGA)n	4
(ACAGACCAG)n	4
(GTTGGCTG)n	4
(TAGCTG)n	4
(TTGTCTTT)n	4
Copia-2_Deu-LTR	4
Homo1	3.92
(TAAAG)n	3.88
(TATATATG)n	3.85
Gypsy-7_DSe-LTR	3.81
(ACCGCCCA)n	3.8
(GCCCGTA)n	3.8
(GGGAGCAG)n	3.75
Harbinger-N1_DPe	3.75
NOF_FB	3.74
BEL-2_DBi-LTR	3.73
Gypsy-13_DSim-I	3.72
(CCAGAAACCA)n	3.71
hAT-5N1_DK	3.69
(GACCCCA)n	3.67
DMRT1B	3.65
(AATGCCAA)n	3.64
(GATTTCA)n	3.62
(GGGACG)n	3.6
(CGCC)n	3.58
(CCTCC)n	3.56
(AAATTA)n	3.5
(AAATTAT)n	3.5
(CCAAACA)n	3.5
(CCAATCCC)n	3.5
(GGAAGGG)n	3.5
(TCATCAA)n	3.5
(TCTAAAA)n	3.5
(TTTAAA)n	3.5
BEL-4_DBp-I	3.5
R1-1_DYa	3.5
Rehavkus-1_DY	3.49
ZAM_LTR	3.4
Gypsy-5_DKi-LTR	3.39
(CGGACTC)n	3.38
(CTCTCCA)n	3.38
R1_DEr	3.37
(TAGCTGA)n	3.35
(ACCCGAA)n	3.33
(AGGATCA)n	3.33
(CGAGAT)n	3.33
(TAGATTT)n	3.33
(TTATTAC)n	3.33
(AGTAGG)n	3.31
(TGGTGGCCAC)n	3.29
ZAM_I-int	3.29
(TGTGGATA)n	3.27
piRNA_cluster_80F	3.26
(TAGATG)n	3.25
(TATGGAT)n	3.25
(TATTACA)n	3.25
(CAAAAG)n	3.24
(CCACTTC)n	3.21
(CTAAG)n	3.21
(GATACCA)n	3.21
(GTGCAA)n	3.21
(CTAGGA)n	3.2
CR1-5_DRh	3.19
(AACCGGG)n	3.17
(TTCCTAT)n	3.17
BS2	3.17
HETRP_DM	3.17
(ACTGGGA)n	3.15
(TGTTGGCCA)n	3.15
(AATAATAC)n	3.12
(CATTGAA)n	3.12
Nobel_LTR	3.12
Gypsy-3_DGri-I	3.11
(GCCTAC)n	3.06
Gypsy-2_DSe-LTR	3.06
(TGCCTAG)n	3.05
BEL-22_DTa-I	3.03
(ACAATAG)n	3
(ATAGATATC)n	3
(ATATATATTC)n	3
(ATCAC)n	3
(CAGGATC)n	3
(CCCTCC)n	3
(GAGGTGA)n	3
(TCACCGA)n	3
(TCCATTC)n	3
(TGATGTT)n	3
(TGTATTA)n	3
(TGTCGGC)n	3
(TGTCTTGTCA)n	3
(TTCATAT)n	3
(TTCTAGA)n	3
(TTGTCGT)n	3
(TTGTGA)n	3
BEL-7_DMoj-I	3
G6_DM	3
HETA_DSi	3
Jockey-11_DAn	3
Chimpo_I-int	2.97
Gypsy12_LTR	2.97
(GTACTT)n	2.96
(TCCCTCC)n	2.94
(TAGTAT)n	2.92
(TCTTCTG)n	2.92
Gypsy-2_DRh-LTR	2.91
I-2_DYa	2.91
(AGCTCCA)n	2.9
(AGCTTTG)n	2.9
(GGCAAAAT)n	2.9
(GGGAAATCG)n	2.9
NINJA_LTR	2.9
(AGAGTTG)n	2.89
(CCACCAT)n	2.89
(TGTCCAGT)n	2.89
(GGAGCTC)n	2.86
(AAAATCG)n	2.85
DMRT1C	2.84
(GATGTATG)n	2.83
(TATGATA)n	2.83
TAHRE	2.83
(ACCCAAG)n	2.81
(GACCCG)n	2.81
(AATTTTC)n	2.8
(AGCCC)n	2.8
(GGCACTC)n	2.8
(ACTTGGAC)n	2.79
1pt688.Contig101_locus	2.79
Jockey-3_DM	2.79
(GTAAGCT)n	2.77
BATUMI_LTR	2.77
(CTCATA)n	2.76
(TCCTCAG)n	2.76
Gypsy-7_DSe-I	2.76
(GAGTCA)n	2.75
(TCAATATTT)n	2.75
(TCCGCAA)n	2.75
(TGGCATGG)n	2.75
Gypsy-8_DMoj-LTR	2.75
(ACCTGGA)n	2.74
(GGATCTT)n	2.74
(ATATCTT)n	2.71
(ATATTCA)n	2.71
Copia-1_DFi-I	2.7
(AATTTGT)n	2.69
(CCAAGTG)n	2.69
hAT-2_DSe	2.68
(ACAAGAA)n	2.67
(ATTTCCG)n	2.67
(CACCAAC)n	2.67
(GAGATCA)n	2.67
(GTGAGCT)n	2.67
(TAATCAT)n	2.67
(TATGTTT)n	2.67
(TTCTATA)n	2.67
(TTGCGAT)n	2.67
MICROPIA_I-int	2.67
(CAGACCC)n	2.66
(TCTCATC)n	2.66
(TCGGG)n	2.64
(TTACATT)n	2.64
TIRANT_LTR	2.64
piRNA_cluster_38C2	2.63
(CCTAGAA)n	2.62
(CCTCTGAG)n	2.62
(CTCTGTT)n	2.62
(GATATTT)n	2.62
(GCCCTG)n	2.62
(TTTTATTA)n	2.62
BEL-8_DMo-I	2.62
(CTCGCTG)n	2.61
(CTGTCC)n	2.61
R1_DM	2.61
(AACTGGG)n	2.6
(GGCTCA)n	2.6
Copia-1_DSim-I	2.59
(CAAGTTG)n	2.58
Gypsy8_LTR	2.58
(CCACCCCC)n	2.57
(CCGGATT)n	2.57
(CCTGAA)n	2.57
(TGTGGG)n	2.57
(AACAACT)n	2.56
(GGTGGTG)n	2.56
(TCAATGT)n	2.56
Copia1-I_DM	2.56
R1-2_DTa	2.56
(CAGCATCC)n	2.55
(CCCTGAAC)n	2.55
(GATCTCA)n	2.55
(TACTC)n	2.55
(TCTCCCG)n	2.55
(TTGTTCAA)n	2.55
(GCAGAATTT)n	2.53
Gypsy-3_DSe-I	2.53
(AAAATT)n	2.5
(ACATTTAC)n	2.5
(ATATAAA)n	2.5
(ATATGCA)n	2.5
(CCACCCAT)n	2.5
(GGGCTT)n	2.5
(GTCTGGG)n	2.5
(TACTAA)n	2.5
(TATCAA)n	2.5
(TGTTTAG)n	2.5
Gypsy-14_DFi-I	2.5
piggyBac-1_DEu	2.49
(GCAGGAC)n	2.48
MICROPIA_LTR	2.48
(CTTCG)n	2.47
DMRT1A	2.47
(CCTCG)n	2.46
(AGTAA)n	2.45
(GACCGGA)n	2.44
(GAGCAGA)n	2.44
(GTGGTGCAGG)n	2.44
Gypsy-12_DVir-LTR	2.44
(AACCACCC)n	2.43
(CCATGA)n	2.43
(GAATCCC)n	2.43
(TCAGTAT)n	2.43
(TACCTGG)n	2.41
Gypsy-26_DEl-I	2.41
(AACACAT)n	2.4
(ATCTCTT)n	2.4
(TCTCTTT)n	2.4
(TCTTGTA)n	2.4
(TTTTACT)n	2.4
Gypsy-19_DEl-I	2.4
(CCTCCTGGT)n	2.39
(GCAGTTG)n	2.39
(ACTT)n	2.38
(AGTGTCC)n	2.38
(ATTCCAA)n	2.38
(CCCATTC)n	2.38
(TCTCCGC)n	2.38
Transib-3_DBi	2.38
Gypsy-52_DEl-I	2.37
(ACGGT)n	2.36
(GTATTCC)n	2.36
(GTCTTCA)n	2.35
(GTGCTGC)n	2.35
(TGTTATTAT)n	2.35
Gypsy-47_DEl-I	2.35
(CCCAGTA)n	2.34
(TCTATTG)n	2.34
(AAATGTAC)n	2.33
(AGGGG)n	2.33
(CCAACCAC)n	2.33
(CGTCTAC)n	2.33
(GACTCGG)n	2.33
(GGCAACCT)n	2.33
(GGGAAACT)n	2.33
(GTTTCGG)n	2.33
(TTGTCTATT)n	2.33
R1-5_DYa	2.33
(CGGTGG)n	2.32
(GCCGCC)n	2.32
(GGTGAGG)n	2.32
(TGATAT)n	2.32
Gypsy12_I-int	2.32
(ACTATTCA)n	2.31
(GGAGTAA)n	2.31
(TGAGAAC)n	2.31
1pt688.3L_locus	2.31
(CCCCTT)n	2.3
(TCGTG)n	2.3
I-1_DEu	2.3
(ATTAATT)n	2.29
(CCACTCA)n	2.29
(TGATTTT)n	2.29
(AAGAGAC)n	2.28
(GCTTGCAACA)n	2.27
(GTTCTTT)n	2.27
(AGTAGCG)n	2.26
(ATTCTGGG)n	2.26
(CAGTAAG)n	2.26
(TCTACGG)n	2.26
(AGCATT)n	2.25
(CAGGCT)n	2.25
(CCGGTTG)n	2.25
(GTCCTCCA)n	2.25
Gypsy13-I_Dpse	2.25
(AGCAAG)n	2.24
(CCAAGAA)n	2.24
(CTCCCTC)n	2.24
(ATTCTGAA)n	2.22
(CCTCTT)n	2.22
(TGCAGG)n	2.22
(TGTTAA)n	2.22
(ATATCA)n	2.21
(ATTATCA)n	2.21
(GGGGATT)n	2.21
(TTTTGGA)n	2.21
(AAAACTGGC)n	2.2
(AGTTGCG)n	2.2
Gypsy-2_DBp-I	2.2
(CAGAGTT)n	2.19
(GGGTATA)n	2.19
(TGCTTTG)n	2.19
ACCORD2_LTR	2.19
Baggins1	2.19
Jockey-2_DSim	2.19
(AGGCGC)n	2.18
Jockey-1_DYa	2.18
(AAAATC)n	2.17
(AAACTT)n	2.17
(CATGTCC)n	2.17
(TAGCAG)n	2.17
(TTGCAGA)n	2.17
(GCGATTG)n	2.16
(AGCCCCA)n	2.15
(CTCTCTT)n	2.15
(CTTTGC)n	2.15
(TCTGTAT)n	2.15
Gypsy-10_DSim-I	2.15
Gypsy-20_DEl-I	2.15
(ACAGGAA)n	2.14
(CCATAA)n	2.14
(TCATATA)n	2.14
BS	2.14
(AACCCGA)n	2.13
(AATGGTA)n	2.13
(CAGTGAC)n	2.13
(CTCACG)n	2.13
(GCCAG)n	2.13
(GCTCACC)n	2.13
(TGTACT)n	2.13
(TTGGCCA)n	2.13
Invader1_I-int	2.12
R1-4_DYa	2.12
(CCTAT)n	2.11
(TATAGTA)n	2.11
(AATCTTA)n	2.1
(CACGGT)n	2.1
(CGGGG)n	2.1
CIRCE	2.1
(ATTCAGC)n	2.09
(GTGAGTG)n	2.09
(TTTTACC)n	2.09
(AGATGGC)n	2.08
(CGTCTC)n	2.08
(AGCTCGT)n	2.07
(ATTAAGA)n	2.07
(CACCATC)n	2.07
(GGAGTGG)n	2.07
(GTCCGTC)n	2.07
Gypsy-4_DKi-I	2.07
(TCCGATG)n	2.06
(TGCTTTTGC)n	2.06
Gypsy-26_DYa-I	2.06
(AGACGT)n	2.05
(ATGTCGC)n	2.05
(ATTTCTC)n	2.05
(GTTCTCT)n	2.05
(TGGGAGGA)n	2.05
(TTGGATGTT)n	2.05
BEL-4_DRh-I	2.05
(CAGACAG)n	2.04
(CTTTCGT)n	2.04
(GTGTTTTT)n	2.04
(TGTGTCCG)n	2.04
CR1-4_DAn	2.04
NOMAD_LTR	2.04
(ATGCA)n	2.03
(ATTCCCC)n	2.03
(CAATTGG)n	2.03
(CCGATCCCAT)n	2.03
(GACTCTG)n	2.03
(GGTCGGT)n	2.03
(TGTGACG)n	2.03
Gypsy-13_DAn-I	2.03
(AACTCTG)n	2.02
(CAACGAA)n	2.02
cen_Y_island	2.02
Gypsy-41_DAn-I	2.01
(ACCACACAG)n	2
(ATAAATT)n	2
(CAGCCACC)n	2
(CATCCAGG)n	2
(CCCCGCTA)n	2
(CCGAGTC)n	2
(CCTTTTT)n	2
(CTATCC)n	2
(CTCCTCA)n	2
(CTTTTAT)n	2
(GCCGGTG)n	2
(GGAAAAA)n	2
(GGGGTT)n	2
(GTGGGGCG)n	2
(GTGTCAG)n	2
(GTTGGGA)n	2
(GTTTTCG)n	2
(TAAAGTT)n	2
(TACATATATA)n	2
(TACTGGA)n	2
(TATTTTAT)n	2
(TCAGAAC)n	2
(TGGGGTC)n	2
(TGGTTCGG)n	2
(TGTTTAT)n	2
(TTAGGA)n	2
CR1-1_DF	2
Gypsy-13_DSim-LTR	2
Jockey-13_DBp	2
hAT-2_DK	2
(CCGGACC)n	1.99
(GTGCCA)n	1.98
(CCGTTA)n	1.97
(CTACA)n	1.97
(CTGTCCGG)n	1.97
(GCGGCT)n	1.97
(GCTCTCA)n	1.97
(GTCGAT)n	1.97
(GTGCA)n	1.97
(TACCCAGC)n	1.97
(TCACCAG)n	1.97
(ACAGCAT)n	1.96
(ACTTTA)n	1.96
(AGCGCC)n	1.96
(CTGGCG)n	1.96
(GAGATGG)n	1.96
(GATCTGGA)n	1.96
(TCAGCT)n	1.96
(TGGTTA)n	1.96
(AGTGT)n	1.95
(GATAAT)n	1.95
(GCTACTA)n	1.95
(GTGCTC)n	1.95
(TCCTTTC)n	1.95
(TCGTTTA)n	1.95
(TGCATA)n	1.95
(TTGGGTGGC)n	1.95
BEL-6_DRh-I	1.95
Jockey-3_DBp	1.95
(CCGCCAT)n	1.94
(CTCTCAG)n	1.94
(CTGCCACAC)n	1.94
(GCCTCCAGA)n	1.94
(GGATCGC)n	1.94
(TCAGGAT)n	1.94
(TTTCATG)n	1.94
Copia-1_DSe-LTR	1.94
Gypsy-12_DRh-LTR	1.94
(AATAAAC)n	1.93
(AATTGTT)n	1.93
(CCCACTC)n	1.93
(CTGGAACCC)n	1.93
(GCCTGT)n	1.93
(TTCCGAT)n	1.93
Gypsy-6_DSim-LTR	1.93
LOOPER1_DM	1.93
Transib-6_DBp	1.93
(AAGTTAT)n	1.92
(CAAGCCC)n	1.91
(CGTTTCG)n	1.91
(CTGGAT)n	1.91
(CTTTCAG)n	1.91
(GGCCGA)n	1.91
(TCAGA)n	1.91
Chimpo_LTR	1.91
Gypsy-3_DKi-I	1.91
(ATTCCCA)n	1.9
(CATGCTG)n	1.9
(GAAAGCT)n	1.9
(GGCACTG)n	1.9
(TATAAA)n	1.9
(TGAGCC)n	1.9
(TGCGCGT)n	1.9
(TGTATCCG)n	1.9
(TTCGGTTG)n	1.9
DM1731_LTR	1.9
Gypsy-19_DWil-LTR	1.9
Gypsy-9_DEl-I	1.9
Jockey-1_DSe	1.9
MuDR-1_DT	1.9
piggyBac-2_DF	1.9
(ATTTAAT)n	1.89
(CACCGG)n	1.89
(CTCGGCA)n	1.89
(TCGGCG)n	1.89
(TTCTGGC)n	1.89
BEL-2_DBp-I	1.89
Gypsy-7_DTa-I	1.89
Gypsy6_I-int	1.89
Jockey-1_DSi	1.89
(ACCTCCG)n	1.88
(ATAGCGG)n	1.88
(CATATGG)n	1.88
(CGGTGGAGG)n	1.88
(CTTGGAA)n	1.88
(GAACAA)n	1.88
(GCATATA)n	1.88
(GGACCCC)n	1.88
(GGCCG)n	1.88
(GTCTTTT)n	1.88
(TGATTAT)n	1.88
(TGCAGGA)n	1.88
(TGTTCCC)n	1.88
(TTTAGAA)n	1.88
(TTTTGCCA)n	1.88
Gypsy-11_DBp-I	1.88
Gypsy-15_DAn-I	1.88
(ACGCACACAC)n	1.87
(ATTTCAGT)n	1.87
(CCCCG)n	1.87
Gypsy-8_DVir-I	1.87
Gypsy16-I_Dpse	1.87
(AGCATTT)n	1.86
(ATCCAGCC)n	1.86
(ATTCTGG)n	1.86
(CAGCCCA)n	1.86
(CCCCATT)n	1.86
(CTTTGCCA)n	1.86
(GAGGACT)n	1.86
(GCCGTG)n	1.86
(GTCAGGG)n	1.86
(TACTTG)n	1.86
(TATATCAA)n	1.86
(TATGC)n	1.86
(TTTGGAT)n	1.86
Gypsy5_LTR	1.86
Jockey-3_DSim	1.86
R1-1_DPer	1.86
(CGGACG)n	1.85
(CTCCCGT)n	1.85
(CTTGTCTC)n	1.85
(GATCCTCCA)n	1.85
(TATATGGT)n	1.85
(TGTTTGT)n	1.85
(TTTTCCAC)n	1.85
BEL-17_DAn-I	1.85
Gypsy-7_DSim-I	1.85
(GTTTTGC)n	1.84
(TGCAATC)n	1.84
Gypsy-17_DRh-I	1.84
Gypsy-34_DEl-I	1.84
(ACTGAAT)n	1.83
(ATAAGA)n	1.83
(ATCCCCAG)n	1.83
(ATCCCCT)n	1.83
(CATTGT)n	1.83
(CCGCA)n	1.83
(GTGAGA)n	1.83
(TAAAAC)n	1.83
(TAAATAA)n	1.83
(TACATT)n	1.83
(TCCGGAT)n	1.83
(TTTGATAT)n	1.83
BEL-3_DBi-LTR	1.83
(ACCGCC)n	1.82
(ACTCCG)n	1.82
(AGCTGAAAA)n	1.82
(AGGGAAC)n	1.82
(CAAGCC)n	1.82
(CAGAATA)n	1.82
(CAGACGA)n	1.82
(CCTATAG)n	1.82
(GACATCG)n	1.82
(GATATA)n	1.82
(TCTGATG)n	1.82
Invader4_LTR	1.82
(AACCCAC)n	1.81
(CCCTGAC)n	1.81
(CGGGTT)n	1.81
(CGGTG)n	1.81
(CGTTTTT)n	1.81
(CTAAGG)n	1.81
(GAGACAG)n	1.81
(GGATCTC)n	1.81
(TGGGTG)n	1.81
(TGTCGA)n	1.81
Gypsy-21_DBp-I	1.81
(ATTATTT)n	1.8
(ATTCGGC)n	1.8
(CAGAAGC)n	1.8
(CCACTTG)n	1.8
(CCAGGAT)n	1.8
(CCTTTA)n	1.8
(GAGAAAT)n	1.8
(GCCAGTG)n	1.8
(GGATCC)n	1.8
(GGGAGCA)n	1.8
(GTCGGTG)n	1.8
(TTTGATT)n	1.8
Mariner-13_DBp	1.8
TART-1_DWi	1.8
(AATGCTGA)n	1.79
(ATCGGT)n	1.79
(CCATATAG)n	1.79
(GAACGGA)n	1.79
(GCATA)n	1.79
(GTACGCCA)n	1.79
(TTGCCCA)n	1.79
Gypsy-7_DWil-LTR	1.79
Gypsy11-I_Dpse	1.79
Gypsy6A_LTR	1.79
(AAGAGC)n	1.78
(AATCCAA)n	1.78
(GAGTGA)n	1.78
(GAGTGGC)n	1.78
(TCTCCGT)n	1.78
(TTCTGAT)n	1.78
(TTGGCAT)n	1.78
(TTTTAGG)n	1.78
Gypsy-22_DYa-I	1.78
(CATTGG)n	1.77
(CCAGATG)n	1.77
(CTGATCC)n	1.77
(GAATATA)n	1.77
(GCAGC)n	1.77
Copia-1_DBi-I	1.77
Copia-1_DSim-LTR	1.77
(AGAGCGG)n	1.76
(AGCTGCA)n	1.76
(AGGGGA)n	1.76
(ATGGTTA)n	1.76
(CCCCAGCTC)n	1.76
(CCCTGCGAT)n	1.76
(CTCGGA)n	1.76
(CTTGCT)n	1.76
(TATCGA)n	1.76
(TGAGG)n	1.76
Invader4_I-int	1.76
Jockey-6_DEu	1.76
(AAAATA)n	1.75
(ACACT)n	1.75
(AGGG)n	1.75
(ATCCGAA)n	1.75
(ATGCTA)n	1.75
(CCGATA)n	1.75
(CTGCCTC)n	1.75
(CTGCTGG)n	1.75
(GATTTTA)n	1.75
(GTTTTTA)n	1.75
(TATAAGT)n	1.75
(TATACAA)n	1.75
(TCGCTAT)n	1.75
(TTGCC)n	1.75
Copia-3_DWil-I	1.75
DIVER2_I-int	1.75
Gypsy13-I_Dya	1.75
TOM_I-int	1.75
(CATATATGTA)n	1.74
(CCTCTC)n	1.74
(GAAG)n	1.74
(GCCAAGTT)n	1.74
(TCCCCG)n	1.74
(TGGCACA)n	1.74
Gypsy-4_DSim-I	1.74
Invader1_LTR	1.74
Jockey-9_DAn	1.74
(CGATTCC)n	1.73
(CTGGAGC)n	1.73
(GCACTGG)n	1.73
(TCGTAA)n	1.73
(TCTTCAG)n	1.73
(TGGGATGGTA)n	1.73
(TTTTTAG)n	1.73
Gypsy-7_DBp-I	1.73
(AAAGTGG)n	1.72
(AACAAAA)n	1.72
(ACCCAG)n	1.72
(CACGGC)n	1.72
(CGGCTAC)n	1.72
(CTTGTCATGT)n	1.72
(GAACTGA)n	1.72
(GGCGCCC)n	1.72
(ACAACAC)n	1.71
(ACCAGCG)n	1.71
(ACTCTAT)n	1.71
(AGGACAA)n	1.71
(CACTCCC)n	1.71
(CCATAAA)n	1.71
(CTACCTG)n	1.71
(GCTGT)n	1.71
(GGCCACT)n	1.71
(GGTAA)n	1.71
(GTTGCCT)n	1.71
(TCACAG)n	1.71
(TCCCGG)n	1.71
(TCGTATT)n	1.71
(TGATTGT)n	1.71
Gypsy-23_DYa-I	1.71
Gypsy-5_DWil-I	1.71
(AGAACTG)n	1.7
(CGGAGT)n	1.7
(CTCTCCCTCT)n	1.7
(GAGAAT)n	1.7
(GATCGTT)n	1.7
(GGTCG)n	1.7
(GGTGTTG)n	1.7
(GTAGCA)n	1.7
(GTGGGA)n	1.7
Gypsy-2_DSe-I	1.7
Hoana2	1.7
(ACTCAGG)n	1.69
(CCTGGCT)n	1.69
(CTGAGC)n	1.69
(GCATGTA)n	1.69
(GGAGCG)n	1.69
(GTTTTGG)n	1.69
(TACTTGGA)n	1.69
(TGCCGTC)n	1.69
(TTGGCCAC)n	1.69
Gypsy-4_DEl-I	1.69
piggyBac-1_DW	1.69
(AGAAAAC)n	1.68
(AGATTT)n	1.68
(ATGCCA)n	1.68
(CAAGAT)n	1.68
(CAGAGC)n	1.68
(CCAAGGCAC)n	1.68
(CCAGGT)n	1.68
(CCATCCC)n	1.68
(CTCGGTA)n	1.68
(CTGCCGA)n	1.68
(GACAACC)n	1.68
(TAGTAGAG)n	1.68
(TGTATCTG)n	1.68
(TTACT)n	1.68
(TTGGCTTGGA)n	1.68
Gypsy-2_DAn-I	1.68
Howilli2	1.68
(ACCCAGT)n	1.67
(ATGGACGA)n	1.67
(CAAGCCAC)n	1.67
(CCCCGC)n	1.67
(CCGAGAA)n	1.67
(CCTTCTT)n	1.67
(GATTA)n	1.67
(GCCAGTTG)n	1.67
(GCGGGGT)n	1.67
(GTTACTG)n	1.67
(TCGCTCT)n	1.67
(TGCAGTG)n	1.67
(TGGAATT)n	1.67
(TGGCG)n	1.67
(TTAGCAA)n	1.67
BEL-15_DTa-I	1.67
Outcast-1_DEu	1.67
(ACGCAA)n	1.66
(CCGAACC)n	1.66
(CGAAGG)n	1.66
(GCATCG)n	1.66
(TCGGAG)n	1.66
BEL-3_DYa-LTR	1.66
Gypsy-21_DAn-I	1.66
Gypsy_6B	1.66
ROOA_I-int	1.66
(AGACCCA)n	1.65
(AGACTAT)n	1.65
(AGGATAAC)n	1.65
(ATACATA)n	1.65
(CCCCATG)n	1.65
(CCGC)n	1.65
(CTGGAC)n	1.65
(GAGTCCT)n	1.65
(GCACAGA)n	1.65
(GCCATG)n	1.65
(GGAGCAT)n	1.65
(GGTCTT)n	1.65
(GGTGCC)n	1.65
(TAGATT)n	1.65
(TCCGGA)n	1.65
(TGCATGC)n	1.65
(TTCTCAGT)n	1.65
BEL-15_DTa-LTR	1.65
Gypsy-4_DAn-I	1.65
Homo8	1.65
Kiri-3_DK	1.65
(AACCGGC)n	1.64
(AACGGC)n	1.64
(ATGGTTC)n	1.64
(CAGCATC)n	1.64
(CTAGGGA)n	1.64
(CTGAC)n	1.64
(CTTTTTC)n	1.64
(GAACATT)n	1.64
(GAGCAT)n	1.64
(GGTGGT)n	1.64
(TAACTAT)n	1.64
(TGAGCT)n	1.64
(TGCTGGC)n	1.64
(TGGACCA)n	1.64
(TGGGCTC)n	1.64
(TGGTGCTGA)n	1.64
(TTTTGGTA)n	1.64
BEL-4_DBi-I	1.64
Gypsy-24_DY-I	1.64
Gypsy3_LTR	1.64
R1-2_DM	1.64
(AGTCCTT)n	1.63
(CCCTTAA)n	1.63
(CCGCCGT)n	1.63
(CCGGTTT)n	1.63
(GCACCAACA)n	1.63
(GCTTCCA)n	1.63
(TACTCGT)n	1.63
(TTCCCAA)n	1.63
(TTTCCAG)n	1.63
Gypsy-2_DVir-I	1.63
RSP-LIKE_SAT	1.63
(AAAAATC)n	1.62
(ACACTGT)n	1.62
(ATCCAAA)n	1.62
(CAGACC)n	1.62
(CCCGAAT)n	1.62
(CTGCGTG)n	1.62
(GCAACCG)n	1.62
(GGCTCAA)n	1.62
(GTGCAGA)n	1.62
(TCCTCGTCG)n	1.62
BEL-14_DEl-I	1.62
G7_DM	1.62
Gypsy5-I_Dpse	1.62
(ACCTGG)n	1.61
(CAGCTCG)n	1.61
(CAGGAGCAG)n	1.61
(CCATGGA)n	1.61
(CCCCT)n	1.61
(CGAATGC)n	1.61
(CGGGTCA)n	1.61
(GCCACCCAG)n	1.61
(GGCGGCT)n	1.61
(GGGAATCCG)n	1.61
(GTCCATA)n	1.61
(TCCCACA)n	1.61
(TCTTTTT)n	1.61
(TTATTGT)n	1.61
LOA-3_DPer	1.61
TRANSIB1	1.61
hAT-1_DAn	1.61
(AACGAAC)n	1.6
(AGTCTTC)n	1.6
(CGAGCTC)n	1.6
(CTTAT)n	1.6
(GAATGT)n	1.6
(GACTAG)n	1.6
(GATCTGA)n	1.6
(GCCATCCT)n	1.6
(TTCAATT)n	1.6
(TTTTGGTG)n	1.6
CR1-2_DK	1.6
Copia1-LTR_DM	1.6
Gypsy-24_DYa-I	1.6
Jockey-11B_DBp	1.6
(AGGAGCC)n	1.59
(AGTCCAG)n	1.59
(ATATTTG)n	1.59
(CCAAGGA)n	1.59
(CCAAGTT)n	1.59
(CCCCCT)n	1.59
(GATCCG)n	1.59
(GGAGGC)n	1.59
(TGCAGTC)n	1.59
(TTTTCTA)n	1.59
(TTTTGGT)n	1.59
Gypsy-10_DMoj-LTR	1.59
Jockey-4_DK	1.59
(AAACTGA)n	1.58
(AATCTGA)n	1.58
(ACCAGAC)n	1.58
(ACCTTTC)n	1.58
(CACGAG)n	1.58
(CCAGTCG)n	1.58
(CCTTACT)n	1.58
(CTCCAGG)n	1.58
(CTCTTGT)n	1.58
(CTGGCCATT)n	1.58
(GATCAT)n	1.58
(GGATGGC)n	1.58
(GGGGT)n	1.58
(TAAGC)n	1.58
(TGCTAC)n	1.58
(TTCCCCG)n	1.58
Gypsy-30_DWil-I	1.58
Harbinger-1_DRh	1.58
(AATTCGG)n	1.57
(ACAAATGT)n	1.57
(AGCGA)n	1.57
(AGGAC)n	1.57
(AGGATAT)n	1.57
(ATGTT)n	1.57
(ATTAACG)n	1.57
(CAATCCC)n	1.57
(CCATTCG)n	1.57
(CCCTTCT)n	1.57
(CGACACA)n	1.57
(CGTGGT)n	1.57
(CGTTTGC)n	1.57
(CGTTTTG)n	1.57
(CTAGAAT)n	1.57
(CTAGCC)n	1.57
(GAGACA)n	1.57
(GAGCCA)n	1.57
(GCAAGTG)n	1.57
(GTTGGCG)n	1.57
(TAACTTT)n	1.57
(TCTCGGC)n	1.57
(TGGGTGGTAG)n	1.57
(TTTTTTT)n	1.57
GTWIN_I-int	1.57
Gypsy-26_DYa-LTR	1.57
(ACGAACA)n	1.56
(ATAGCCC)n	1.56
(ATCTTAT)n	1.56
(CAATAAA)n	1.56
(CGCCCTC)n	1.56
(GCAGAAT)n	1.56
(TAGATAC)n	1.56
(TATCATT)n	1.56
(TGGCCGGT)n	1.56
(TGTACGATT)n	1.56
(TGTGTGG)n	1.56
(TTGAGAA)n	1.56
BEL-6_DYa-I	1.56
Gypsy-6_DSe-I	1.56
HOBO	1.56
R1-3B_DEl	1.56
(AATTCTA)n	1.55
(ACAGCGG)n	1.55
(ACGGACA)n	1.55
(AGACTTCC)n	1.55
(CGATCTT)n	1.55
(GCCGAG)n	1.55
(GTATACT)n	1.55
(GTTCTCCA)n	1.55
(TAAAAA)n	1.55
(TATTTAT)n	1.55
(TTAGCCA)n	1.55
(TTATACT)n	1.55
(TTATATCG)n	1.55
G5_DM	1.55
Gypsy-60_DWil-I	1.55
Jockey-12_DBp	1.55
(AATATTCACG)n	1.54
(AGATCGG)n	1.54
(ATTCCAC)n	1.54
(CAGTAC)n	1.54
(CTTATAT)n	1.54
(GATGGTCG)n	1.54
(GCCCA)n	1.54
(GGAATTC)n	1.54
(GGATCAG)n	1.54
(GGTGTG)n	1.54
(TCCGTGC)n	1.54
(TGCGATG)n	1.54
GTWIN_LTR	1.54
Gypsy-20_DTa-I	1.54
Rsp_SAT	1.54
Transib-4_DBp	1.54
(AACTCAA)n	1.53
(ACACTCC)n	1.53
(ACTGACGG)n	1.53
(ACTTCG)n	1.53
(ATTAG)n	1.53
(CAACTGG)n	1.53
(CAATTTT)n	1.53
(CCGGATC)n	1.53
(CGCATTC)n	1.53
(CTCTGAT)n	1.53
(GACTGGGTC)n	1.53
(GCAATTG)n	1.53
(GCAGGTT)n	1.53
(GCCCAGTT)n	1.53
(TAACAGT)n	1.53
(TCAGGT)n	1.53
(TGAATA)n	1.53
(TTGATGC)n	1.53
(TTTCCGCGC)n	1.53
BEL-2_DSe-I	1.53
CR1-3_DEl	1.53
Gypsy-20_DBp-I	1.53
Gypsy6-LTR_Dya	1.53
(AACCTCG)n	1.52
(ACAAAAA)n	1.52
(ACCACT)n	1.52
(ATGTTTT)n	1.52
(ATTCGCC)n	1.52
(CCATCGA)n	1.52
(CCTCT)n	1.52
(GGCCTG)n	1.52
(GGCTTG)n	1.52
(GGTGGTTC)n	1.52
(GTTTTATC)n	1.52
(TATACTC)n	1.52
(TCATAT)n	1.52
(TCTGTTC)n	1.52
(TTGTCCC)n	1.52
(TTTCACC)n	1.52
1pt688.Contig9_locus	1.52
Gypsy-3_DRh-I	1.52
Gypsy1-I_Dmoj	1.52
R2_DSi	1.52
(AAGGT)n	1.51
(ACGAGGC)n	1.51
(ATGAAGT)n	1.51
(CAGGATACGG)n	1.51
(CATCAA)n	1.51
(CCAGGA)n	1.51
(CGCACAG)n	1.51
(TGGGTT)n	1.51
(TTATGAA)n	1.51
BEL-5_DAn-I	1.51
BS3_DM	1.51
Gypsy-31_DWil-I	1.51
Gypsy1-I_DM	1.51
Gypsy14-I_Dpse	1.51
(AACAATT)n	1.5
(ACAATTT)n	1.5
(ACTAA)n	1.5
(ACTATA)n	1.5
(ACTATG)n	1.5
(AGGACAG)n	1.5
(AGTCTGC)n	1.5
(ATTGAGC)n	1.5
(CAAGAAA)n	1.5
(CAAGATG)n	1.5
(CCGGCA)n	1.5
(CGACCTA)n	1.5
(CGGCAG)n	1.5
(CGGGAT)n	1.5
(CTCCAGTAC)n	1.5
(CTTTTTGT)n	1.5
(CTTTTTTA)n	1.5
(GAGCATCG)n	1.5
(GATGGCATC)n	1.5
(GCAAATA)n	1.5
(GGACAAT)n	1.5
(GGGGATC)n	1.5
(TAAGTATA)n	1.5
(TAGCC)n	1.5
(TCTACTA)n	1.5
(TGCATCA)n	1.5
(TTGATCT)n	1.5
(TTTCTTG)n	1.5
(TTTTATCG)n	1.5
ACCORD2_I-int	1.5
Gypsy-27_DWil-I	1.5
Hogri1	1.5
(AGCACGCAG)n	1.49
(AGCTGGT)n	1.49
(CTGAGAC)n	1.49
(GCCGTCC)n	1.49
(GGACTCC)n	1.49
(GGTTCA)n	1.49
(TACATAC)n	1.49
ACCORD_LTR	1.49
Gypsy-4_DSe-LTR	1.49
Jockey-1_DEr	1.49
piRNA_cluster_38C1	1.49
(ACCAACGT)n	1.48
(ACTCGA)n	1.48
(ATCGCG)n	1.48
(ATTGGGTGG)n	1.48
(ATTTTAT)n	1.48
(CCAAAAC)n	1.48
(CCCCGTA)n	1.48
(CCGGAT)n	1.48
(CGCGGAG)n	1.48
(CTTGGAT)n	1.48
(CTTTCTC)n	1.48
(GCCAGCTT)n	1.48
(GCCCGAA)n	1.48
(GGACTA)n	1.48
(GGAGACG)n	1.48
(GGCTTTCT)n	1.48
(GGTATA)n	1.48
(TCGCATT)n	1.48
(TGCGAG)n	1.48
(TGGAGAT)n	1.48
(TGTTCTC)n	1.48
BEL-13_DP-I	1.48
LOA-2_DGri	1.48
Transib-6_DAn	1.48
hAT-1_DT	1.48
(ACCCGGGA)n	1.47
(ACTCGG)n	1.47
(ACTTGCA)n	1.47
(AGTTGAA)n	1.47
(ATCTA)n	1.47
(ATTTCGG)n	1.47
(CACCCC)n	1.47
(CACCTG)n	1.47
(CAGCCTG)n	1.47
(CCAGAGCT)n	1.47
(CCAGTTC)n	1.47
(CCGAGAC)n	1.47
(CGTGGG)n	1.47
(GAAAAA)n	1.47
(GATTCTC)n	1.47
(GGATCTAA)n	1.47
(GGGGCTT)n	1.47
(GGTCCC)n	1.47
(TCTGAAG)n	1.47
(TGACCAG)n	1.47
BEL-15_DP-I	1.47
Gypsy-11_DVir-I	1.47
Gypsy-5_DEr-LTR	1.47
Gypsy_LTR	1.47
R1-5_DK	1.47
(ACCAGACAG)n	1.46
(CATCAGCAA)n	1.46
(CCATATT)n	1.46
(CGAAAA)n	1.46
(CTCGACGCGA)n	1.46
(GACGGA)n	1.46
(GATCCAA)n	1.46
(GGTGGATG)n	1.46
(GTCAGTGA)n	1.46
(GTCCTG)n	1.46
(TAATTAT)n	1.46
(TCACTCT)n	1.46
(TGTCAT)n	1.46
(TTCTTGG)n	1.46
(TTGGCG)n	1.46
(TTTAAC)n	1.46
(TTTAACT)n	1.46
Gypsy-13_DRh-I	1.46
Gypsy-32_DWil-LTR	1.46
Gypsy-36_DWil-I	1.46
R1-3_DYa	1.46
(AACAAA)n	1.45
(AAGATGG)n	1.45
(AAGGACA)n	1.45
(ACCAAG)n	1.45
(ATCTAC)n	1.45
(CAGACTG)n	1.45
(CAGGACC)n	1.45
(CCACCCAAT)n	1.45
(CCACCCC)n	1.45
(CCAGGTT)n	1.45
(CGTTGTT)n	1.45
(CTCTCGT)n	1.45
(CTCTGAG)n	1.45
(GAGAGG)n	1.45
(GCGAATA)n	1.45
(GGATTCTC)n	1.45
(GGCCAAGT)n	1.45
(GTACTCC)n	1.45
(GTGGGC)n	1.45
(GTTTGAA)n	1.45
(TATATGTA)n	1.45
(TATTGTT)n	1.45
(TCCCGCA)n	1.45
(TCTGTTT)n	1.45
(TGAGGA)n	1.45
(TGCGTGA)n	1.45
Gypsy-11_DSim-I	1.45
Gypsy-17_DBi-LTR	1.45
Kiri-1_DK	1.45
cen_2_island	1.45
(AAGCAT)n	1.44
(ACAGGA)n	1.44
(ACCTGCCC)n	1.44
(ACGAATA)n	1.44
(ACTACTT)n	1.44
(AGATGCG)n	1.44
(AGCGTGG)n	1.44
(ATAGGT)n	1.44
(ATGTCG)n	1.44
(ATTTTGG)n	1.44
(CAGTATC)n	1.44
(CCCCAGA)n	1.44
(CCCCTGA)n	1.44
(CCGAACCA)n	1.44
(CCGCCCC)n	1.44
(CGAACCAT)n	1.44
(CTACCAT)n	1.44
(CTTGGCT)n	1.44
(GACCTGT)n	1.44
(GCACTCCG)n	1.44
(GCCCAA)n	1.44
(GTCGTGG)n	1.44
(TCCAGAT)n	1.44
(TCGCTG)n	1.44
(TCTCGTC)n	1.44
(TGGTCACA)n	1.44
(TTAAGAA)n	1.44
(TTATTAG)n	1.44
Mariner-4_DBp	1.44
(AATAACA)n	1.43
(AATAGA)n	1.43
(AATCGGAG)n	1.43
(AGAATGG)n	1.43
(ATTACATTA)n	1.43
(CAAGTCT)n	1.43
(CACTTT)n	1.43
(CCCACAA)n	1.43
(CTAGGTC)n	1.43
(CTGGCAAA)n	1.43
(GAACCGCCT)n	1.43
(GCCTGGTTC)n	1.43
(GGCGATTT)n	1.43
(GGTGTGTG)n	1.43
(GTATCG)n	1.43
(TAACTTA)n	1.43
(TAATTAC)n	1.43
(TAGAG)n	1.43
(TCACAC)n	1.43
(TCCTA)n	1.43
(TCCTGGT)n	1.43
(TGGCCC)n	1.43
(TGGGAGC)n	1.43
(TTGTAC)n	1.43
(TTTAATAA)n	1.43
(TTTCCTT)n	1.43
Jockey-2_DBp	1.43
(AAGTCGCCAG)n	1.42
(AATGGTG)n	1.42
(AGGCAG)n	1.42
(ATCTTCC)n	1.42
(CACCACT)n	1.42
(CCCAAGCT)n	1.42
(CCGCCG)n	1.42
(CTTTTTT)n	1.42
(GACAACG)n	1.42
(GAGTTCC)n	1.42
(GCGCAG)n	1.42
(GGCTTGC)n	1.42
(GGTCCTG)n	1.42
(GGTGTGTT)n	1.42
(GTCGGAG)n	1.42
(GTGTGTCA)n	1.42
(GTTGGCC)n	1.42
(GTTGTG)n	1.42
(TCCTGGC)n	1.42
(TGAGATA)n	1.42
(TGGACG)n	1.42
(TGTCC)n	1.42
(TTATAGC)n	1.42
(TTTATCA)n	1.42
(TTTCGAT)n	1.42
BARI_DM	1.42
Gypsy-30_DAn-I	1.42
Gypsy1-LTR_DM	1.42
Penelope2_Dw	1.42
(ATTCCGG)n	1.41
(CATTG)n	1.41
(CCAAAACCAC)n	1.41
(CCTCCG)n	1.41
(CTGGAG)n	1.41
(CTGTTGG)n	1.41
(GAACCC)n	1.41
(GATACGG)n	1.41
(GGTCCAT)n	1.41
(TGAAGAC)n	1.41
(TTACAT)n	1.41
(TTTTTTC)n	1.41
Gypsy-6_DWil-I	1.41
Gypsy-7_DSim-LTR	1.41
(AATTTCA)n	1.4
(ACTAGCA)n	1.4
(ACTAGCC)n	1.4
(ACTCT)n	1.4
(AGATAAT)n	1.4
(AGCCGC)n	1.4
(ATACTAAT)n	1.4
(ATCCCAG)n	1.4
(CAAGTTA)n	1.4
(CACACC)n	1.4
(CACCCG)n	1.4
(CAGGCAG)n	1.4
(CATGGA)n	1.4
(CCAGCTC)n	1.4
(CCCCATAT)n	1.4
(CGAATTA)n	1.4
(CGCCACT)n	1.4
(CGGA)n	1.4
(GCAAAAT)n	1.4
(GCGTCG)n	1.4
(GCTCAGA)n	1.4
(GTAATAA)n	1.4
(GTCCGG)n	1.4
(TAAATT)n	1.4
(TATAGT)n	1.4
(TATATTTA)n	1.4
(TCGCCAT)n	1.4
(TCTCCCC)n	1.4
(TGGACAC)n	1.4
(TGGCAGT)n	1.4
(TGGGTGGA)n	1.4
(TGTAC)n	1.4
(TTAGA)n	1.4
(TTCAGTT)n	1.4
(TTCCCTT)n	1.4
Copia-3_DAn-I	1.4
Gypsy-25_DYa-I	1.4
Gypsy3_I-int	1.4
Helitron-2_DBp	1.4
(AAACAGA)n	1.39
(AATTATA)n	1.39
(ATACCCT)n	1.39
(ATGCTGC)n	1.39
(CGATGGG)n	1.39
(CGGCGAT)n	1.39
(CTCGATT)n	1.39
(CTGCCT)n	1.39
(CTGTTTT)n	1.39
(GATGGGG)n	1.39
(GCTGAG)n	1.39
(GTAGCCGGA)n	1.39
(GTCCTCCT)n	1.39
(TATAGC)n	1.39
(TGAGA)n	1.39
(TGGCAAC)n	1.39
BEL-4_DEu-I	1.39
DMLTR5	1.39
Gypsy-31_DEl-LTR	1.39
Jockey-4_DF	1.39
(AAACACA)n	1.38
(AAGCTCC)n	1.38
(ACTGAAA)n	1.38
(AGCAGCAAC)n	1.38
(ATCATA)n	1.38
(ATCCAAT)n	1.38
(ATTAAGT)n	1.38
(CAACGTT)n	1.38
(CCCCACTGTG)n	1.38
(GAGACC)n	1.38
(GATTTCT)n	1.38
(GGAGATC)n	1.38
(GTAAGAA)n	1.38
(TACAT)n	1.38
(TAGCT)n	1.38
(TAGGTT)n	1.38
(TAGTCCG)n	1.38
(TCCGTAA)n	1.38
(TCTATCC)n	1.38
(TCTGGAA)n	1.38
(TCTTGT)n	1.38
(TGCCCAG)n	1.38
(TGGCTGA)n	1.38
(TGGGGTG)n	1.38
(TGTATTTC)n	1.38
(TTAGAGT)n	1.38
(TTCTTTT)n	1.38
Gypsy-4_DSim-LTR	1.38
Gypsy-9_DBi-LTR	1.38
Gypsy2_I-int	1.38
MAR_DW	1.38
R1A_DAn	1.38
R2_DM	1.38
(AATTCC)n	1.37
(AGTGAA)n	1.37
(ATATATC)n	1.37
(ATTAACT)n	1.37
(CACAAG)n	1.37
(CACGGAG)n	1.37
(CAGTTTT)n	1.37
(CCTGTGT)n	1.37
(CTCCATC)n	1.37
(CTGAAGA)n	1.37
(CTTCTT)n	1.37
(GATGTA)n	1.37
(GGACCAG)n	1.37
(GGACCGA)n	1.37
(GTCGCA)n	1.37
(TATCTTT)n	1.37
(TCGCCCC)n	1.37
(TGCCGGA)n	1.37
(TGGCACT)n	1.37
Galileo_DW	1.37
Gypsy-37_DEl-I	1.37
Invader3_I-int	1.37
Jockey-3_DRh	1.37
NOMAD_I-int	1.37
hAT-3_DBp	1.37
(AATACTC)n	1.36
(ACGCCG)n	1.36
(ATACAGT)n	1.36
(ATGTAG)n	1.36
(CAAG)n	1.36
(CATTCACT)n	1.36
(CCAAAA)n	1.36
(CTCAGGA)n	1.36
(CTCTTT)n	1.36
(GAAATCGGAC)n	1.36
(GAGATGT)n	1.36
(GAGTTCG)n	1.36
(GCAAGCA)n	1.36
(GCACCCC)n	1.36
(GCCTTC)n	1.36
(TGGCTGGC)n	1.36
(TGGTCGC)n	1.36
BLOOD_LTR	1.36
Chouto_I-int	1.36
Gypsy-12_DEu-I	1.36
Gypsy-6_DPer-I	1.36
Gypsy-7_DEl-LTR	1.36
Jockey-4_DBp	1.36
(AAAACAA)n	1.35
(AACATA)n	1.35
(AATTGCATTG)n	1.35
(ACGGCA)n	1.35
(AGACTCC)n	1.35
(AGATACC)n	1.35
(ATGAAA)n	1.35
(ATGGTAGG)n	1.35
(ATTTGAC)n	1.35
(CAGAGAA)n	1.35
(CAGGAGC)n	1.35
(CCCGCCA)n	1.35
(CCGGATCA)n	1.35
(CCGGTT)n	1.35
(CGATAA)n	1.35
(CGGAGAA)n	1.35
(CGGGTAA)n	1.35
(GGAAA)n	1.35
(GGAGAC)n	1.35
(GTCTCC)n	1.35
(TCCAGCAGC)n	1.35
(TCTCCTG)n	1.35
(TCTGGG)n	1.35
(TGAAGTT)n	1.35
(TGGCCT)n	1.35
(TGTCCC)n	1.35
(TGTCCGT)n	1.35
(TTTATAA)n	1.35
Copia-2_DEl-I	1.35
Gypsy-28_DYa-LTR	1.35
Gypsy7-I_Dya	1.35
HMSBEAGLE_I-int	1.35
(AGCTGGG)n	1.34
(ATCCGCG)n	1.34
(ATTGTC)n	1.34
(CGCTGC)n	1.34
(GCCAA)n	1.34
(GCCATGA)n	1.34
(GGAATAT)n	1.34
(GGATCGG)n	1.34
(GGCACTCT)n	1.34
(GTGGATCA)n	1.34
(TACTCGG)n	1.34
(TCAGGA)n	1.34
(TCAGTCC)n	1.34
(TCCGGAC)n	1.34
(TCCTCGT)n	1.34
(TGCGAC)n	1.34
BEL3_DM-I	1.34
IVK_DM	1.34
Jockey2	1.34
M4DM	1.34
(AAATATTG)n	1.33
(AACAAGG)n	1.33
(ACCCATC)n	1.33
(ACGAG)n	1.33
(AGAATG)n	1.33
(AGGAAG)n	1.33
(AGGACTT)n	1.33
(AGGAGG)n	1.33
(AGGTAGT)n	1.33
(AGTCAGTT)n	1.33
(ATAACTA)n	1.33
(ATATTTT)n	1.33
(ATCTTT)n	1.33
(ATGCAACA)n	1.33
(ATTCACT)n	1.33
(ATTCGAT)n	1.33
(ATTTTTC)n	1.33
(CAATAC)n	1.33
(CAGTA)n	1.33
(CAGTTCC)n	1.33
(CCCACC)n	1.33
(CGCAATT)n	1.33
(CGCCTGT)n	1.33
(CGCTCT)n	1.33
(CGTGGCAA)n	1.33
(CTCGGAT)n	1.33
(GCAATCC)n	1.33
(GCAGTCT)n	1.33
(GGAAAG)n	1.33
(GGAACTT)n	1.33
(GGCAGAGTGT)n	1.33
(GGCGCT)n	1.33
(GTTAAT)n	1.33
(TAAGCA)n	1.33
(TAAGGT)n	1.33
(TAATAATA)n	1.33
(TAATTC)n	1.33
(TACAGAC)n	1.33
(TACATAT)n	1.33
(TATAAGCTA)n	1.33
(TCAGCGA)n	1.33
(TCAGGC)n	1.33
(TCCGCC)n	1.33
(TCCTGC)n	1.33
(TCTATT)n	1.33
(TGAACAC)n	1.33
(TGACCC)n	1.33
(TGGGTAG)n	1.33
(TTAAATAT)n	1.33
(TTAACAA)n	1.33
(TTCATAA)n	1.33
(TTGCCGT)n	1.33
(TTTTTAC)n	1.33
Gypsy-16_DRh-I	1.33
Gypsy-1_DVir-I	1.33
Gypsy-4_DSe-I	1.33
Gypsy1-I_Dya	1.33
I-1_DBp	1.33
R1-5B_DK	1.33
hAT-2_DRh	1.33
hAT-4_DRh	1.33
(AACCTAA)n	1.32
(AAGCAAG)n	1.32
(AATGTGA)n	1.32
(ACCTCA)n	1.32
(ACCTTGC)n	1.32
(AGTCCC)n	1.32
(CAGTCT)n	1.32
(CATGAG)n	1.32
(CCAGAACCA)n	1.32
(CCCGTG)n	1.32
(CCGAAAG)n	1.32
(CGTTAA)n	1.32
(CTCACCT)n	1.32
(CTGCTAA)n	1.32
(GCCGAGT)n	1.32
(GCGAATT)n	1.32
(GGAGCAG)n	1.32
(GGATCCA)n	1.32
(GGC)n	1.32
(GGCGGTA)n	1.32
(GTCAGTT)n	1.32
(GTCGTTT)n	1.32
(GTTCTT)n	1.32
(TATACG)n	1.32
(TCATAC)n	1.32
(TCCTAC)n	1.32
(TGGGAAAA)n	1.32
(TGTCAGT)n	1.32
(TTTGTGG)n	1.32
Gypsy-20_DAn-I	1.32
Gypsy-6_DGri-I	1.32
Gypsy-9_DSim-LTR	1.32
Gypsy2-I_DV	1.32
Gypsy8-I_Dya	1.32
Gypsy_I-int	1.32
(AATCGAG)n	1.31
(ACCCCTA)n	1.31
(ACTCCGA)n	1.31
(AGGGT)n	1.31
(AGTCCG)n	1.31
(ATAAG)n	1.31
(ATAGTTT)n	1.31
(ATGTTT)n	1.31
(CAGAACC)n	1.31
(CAGGTC)n	1.31
(CCATACC)n	1.31
(CCGAGC)n	1.31
(CCGCCA)n	1.31
(CGCTGCC)n	1.31
(CTCCCTT)n	1.31
(CTGGCCAC)n	1.31
(GAGTCGA)n	1.31
(GCAAATT)n	1.31
(GGACGAAC)n	1.31
(GGCATGG)n	1.31
(GGGAGTT)n	1.31
(GGTTCT)n	1.31
(TACGCA)n	1.31
(TCCCTGG)n	1.31
(TCTGGAG)n	1.31
(TCTTCA)n	1.31
(TGGGAAAG)n	1.31
(TTCATA)n	1.31
(TTCTAC)n	1.31
(TTTATTC)n	1.31
(TTTTAA)n	1.31
BEL-1_DBp-I	1.31
DOC3_DM	1.31
Gypsy-52_DWil-I	1.31
Gypsy-8_DBi-I	1.31
Jockey-1_DEl	1.31
(AACCTC)n	1.3
(AAGCAC)n	1.3
(ACCCATT)n	1.3
(AGACAAC)n	1.3
(AGACGC)n	1.3
(AGCAAA)n	1.3
(ATTTCAT)n	1.3
(CAGAC)n	1.3
(CATCCCAG)n	1.3
(CCCAGAA)n	1.3
(CGAATAC)n	1.3
(CTGCA)n	1.3
(CTGCTAC)n	1.3
(CTTCGGT)n	1.3
(GAACCG)n	1.3
(GCAAA)n	1.3
(GCTGTA)n	1.3
(GGACCC)n	1.3
(GGCAGG)n	1.3
(GGCATTCT)n	1.3
(GGCTG)n	1.3
(GGGCAGAT)n	1.3
(TAGAGCC)n	1.3
(TCCATTCTG)n	1.3
(TGCATTC)n	1.3
(TGGCTC)n	1.3
(TTCTAT)n	1.3
(TTTAATG)n	1.3
(TTTGCGC)n	1.3
BEL-6_DMoj-I	1.3
Copia1-I_Dpse	1.3
Gypsy-7_DFi-I	1.3
Gypsy-8_DSim-I	1.3
Howilli3	1.3
Jockey-2_DK	1.3
(AAAAAAG)n	1.29
(AAGAGCG)n	1.29
(ACGGACAG)n	1.29
(AGAGTC)n	1.29
(AGGCGG)n	1.29
(AGTTGG)n	1.29
(ATATCC)n	1.29
(ATCTCA)n	1.29
(CACTGAT)n	1.29
(CAGGGA)n	1.29
(CATATT)n	1.29
(CCCT)n	1.29
(CGACCCT)n	1.29
(CTCGACT)n	1.29
(GAAAACT)n	1.29
(GACGAAGTG)n	1.29
(GATGGCTA)n	1.29
(GATTAG)n	1.29
(GCCAGGA)n	1.29
(GGACGT)n	1.29
(GTAGAT)n	1.29
(GTCCTTC)n	1.29
(GTCTATAT)n	1.29
(GTTAATTGT)n	1.29
(TATCCTT)n	1.29
(TCCCCCT)n	1.29
(TGCACGT)n	1.29
(TGTAGA)n	1.29
(TGTTGCC)n	1.29
(TTGGGTG)n	1.29
(TTTTGCC)n	1.29
Gypsy-10_DAn-I	1.29
Gypsy-18_DTa-I	1.29
Gypsy-3_DRh-LTR	1.29
I-4_DAn	1.29
Mariner-5_DRh	1.29
RTEX-1_DT	1.29
Transib-11_DAn	1.29
(AACCCG)n	1.28
(AATATGT)n	1.28
(ACAGCAC)n	1.28
(ACCCCGGA)n	1.28
(AGATACAA)n	1.28
(AGCTAAGT)n	1.28
(AGTCAGC)n	1.28
(ATTCAT)n	1.28
(CAATGT)n	1.28
(CCCGCC)n	1.28
(CCGTGA)n	1.28
(GCAACTA)n	1.28
(GGACGCA)n	1.28
(GGCTGT)n	1.28
(GGCTTTC)n	1.28
(GGTAGG)n	1.28
(GGTGGTGCAT)n	1.28
(GTAAATC)n	1.28
(GTCCTA)n	1.28
(TAAGTA)n	1.28
(TACAA)n	1.28
(TACCCAG)n	1.28
(TATCGC)n	1.28
(TCAGGAA)n	1.28
(TCCTC)n	1.28
(TCTCGAC)n	1.28
(TGGGTGG)n	1.28
(TTACAG)n	1.28
(TTTCTCG)n	1.28
(TTTCTTC)n	1.28
BEL-12_DTa-I	1.28
CR1-6_DT	1.28
DIVER2_LTR	1.28
FW_DM	1.28
Gypsy-23_DY-I	1.28
HELENA_RT	1.28
(AAACGA)n	1.27
(AACCTGC)n	1.27
(AACTTA)n	1.27
(AAGACTG)n	1.27
(AAGATT)n	1.27
(AGCGAA)n	1.27
(AGCGAAA)n	1.27
(AGGTG)n	1.27
(ATAGCGA)n	1.27
(ATAGTT)n	1.27
(ATCCGATCCC)n	1.27
(CATCGT)n	1.27
(CCACTCC)n	1.27
(CCCCCAA)n	1.27
(CCTGTTG)n	1.27
(CGAACCAC)n	1.27
(CGAGAAG)n	1.27
(CGATCAG)n	1.27
(CGGCGA)n	1.27
(CTAGCAA)n	1.27
(CTCACCAG)n	1.27
(CTCACT)n	1.27
(CTTTCAC)n	1.27
(GACGCAG)n	1.27
(GCGGAAAA)n	1.27
(GCTGTG)n	1.27
(GGAATA)n	1.27
(GGACATCG)n	1.27
(GTATTAT)n	1.27
(TAAAT)n	1.27
(TACCATG)n	1.27
(TATCAAC)n	1.27
(TATCGGC)n	1.27
(TCACTA)n	1.27
(TCCAGTG)n	1.27
(TCGCCCGA)n	1.27
(TCTCCAG)n	1.27
(TGAGAT)n	1.27
(TGCCAT)n	1.27
(TGGGCCA)n	1.27
(TGGGTGA)n	1.27
(TGTGTGTGTA)n	1.27
(TGTTATC)n	1.27
(TTAATT)n	1.27
(TTCCTTT)n	1.27
(TTGTGC)n	1.27
BEL-3_DVir-I	1.27
BEL1-I_DV	1.27
Copia2_LTR_DM	1.27
Gypsy10-I_Dya	1.27
I-3_DF	1.27
Jockey-4_DAn	1.27
ROOA_LTR	1.27
cen_X_island	1.27
(AAACAG)n	1.26
(AATCTCG)n	1.26
(ACACCCT)n	1.26
(ACTCCAGG)n	1.26
(AGTCCTG)n	1.26
(ATATTG)n	1.26
(ATGGGAGGT)n	1.26
(ATTCTA)n	1.26
(ATTTTGC)n	1.26
(CAGACTT)n	1.26
(CATTAG)n	1.26
(CCAGTG)n	1.26
(CCCAAA)n	1.26
(CCGTCT)n	1.26
(CGAAGC)n	1.26
(CTATTC)n	1.26
(GATCGCA)n	1.26
(GCAGCTC)n	1.26
(GCATTTC)n	1.26
(GCTGCTGTT)n	1.26
(GCTTTTG)n	1.26
(GGATGGCTT)n	1.26
(GGCTCT)n	1.26
(GGTGAGA)n	1.26
(GGTGG)n	1.26
(GGTGGCT)n	1.26
(GTCGC)n	1.26
(GTTGTA)n	1.26
(TCCTGAG)n	1.26
(TGAAT)n	1.26
(TGCTCCT)n	1.26
(TGGATAC)n	1.26
(TGGATGGG)n	1.26
(TGGTGAT)n	1.26
(TGTAGTC)n	1.26
(TTAGCCT)n	1.26
(TTCGCCT)n	1.26
(TTTTTCG)n	1.26
DMTOM1_LTR	1.26
Gypsy-25_DEl-I	1.26
Gypsy-8_DEl-LTR	1.26
Gypsy-9_DFi-I	1.26
Gypsy4_LTR	1.26
S_DM	1.26
TIRANT_I-int	1.26
Transib-2_DBi	1.26
(AACTCG)n	1.25
(AAGTTT)n	1.25
(AATAAT)n	1.25
(ACACC)n	1.25
(AGAACTC)n	1.25
(AGACT)n	1.25
(AGGAACA)n	1.25
(AGTAAG)n	1.25
(ATAACAA)n	1.25
(CAACAAG)n	1.25
(CCATGCA)n	1.25
(CCATGCC)n	1.25
(CCCAACA)n	1.25
(CCGGAC)n	1.25
(CGAATGAAT)n	1.25
(CTCCT)n	1.25
(CTGAGAAA)n	1.25
(CTTCTTG)n	1.25
(CTTGGAGTT)n	1.25
(GAAGC)n	1.25
(GACGGCA)n	1.25
(GAGCCCA)n	1.25
(GATGTC)n	1.25
(GCATTTG)n	1.25
(GCTTATG)n	1.25
(GGACCAT)n	1.25
(GTGTGTTG)n	1.25
(TAACTA)n	1.25
(TATATAA)n	1.25
(TATGTATC)n	1.25
(TCCGC)n	1.25
(TCCTTGC)n	1.25
(TCGCTA)n	1.25
(TGCTTAT)n	1.25
(TGGCATGGTA)n	1.25
(TGTAG)n	1.25
(TGTCCTT)n	1.25
(TTTTTCT)n	1.25
ACCORD_I-int	1.25
Chouto_LTR	1.25
Copia-2_DKi-I	1.25
Gypsy-11_DFi-I	1.25
Gypsy-15_DBp-I	1.25
Gypsy-6_DSe-LTR	1.25
Gypsy10_LTR	1.25
Gypsy4_I-int	1.25
Hoana1	1.25
R1-1B_DK	1.25
Transib-4_DAn	1.25
hAT-1N_DP	1.25
piRNA_cluster_flamenco	1.25
(AACTCA)n	1.24
(AATCCTC)n	1.24
(AATTAC)n	1.24
(ACTGCAT)n	1.24
(AGATTTC)n	1.24
(AGGAT)n	1.24
(AGGTAA)n	1.24
(AGTACT)n	1.24
(AGTTAC)n	1.24
(AGTTGGA)n	1.24
(ATAACCC)n	1.24
(ATCTTGC)n	1.24
(ATGCAAA)n	1.24
(ATGGAGA)n	1.24
(CAAGCT)n	1.24
(CAGAGG)n	1.24
(CCAAGCCATT)n	1.24
(CCAGAG)n	1.24
(CCGAC)n	1.24
(CCGTATC)n	1.24
(CGAGTCT)n	1.24
(CTCGGAG)n	1.24
(CTGGGAG)n	1.24
(GAATGA)n	1.24
(GACGTC)n	1.24
(GATCGAC)n	1.24
(GCAAGCT)n	1.24
(GCCTTT)n	1.24
(GGGAGCG)n	1.24
(TACCGAG)n	1.24
(TATAATA)n	1.24
(TCAAAT)n	1.24
(TCCGTAC)n	1.24
(TCGGACT)n	1.24
(TGGCGAA)n	1.24
BEL2-I_Dmoj	1.24
BEL2-I_Dya	1.24
DOC2_DM	1.24
G3_DM	1.24
G4_DM	1.24
Gypsy4-I_Dya	1.24
Helitron-5_DRh	1.24
Zator-1_DF	1.24
(AAAGC)n	1.23
(ACCACCA)n	1.23
(ACCCAGC)n	1.23
(ACCCCAA)n	1.23
(ACCTCTG)n	1.23
(ACTTGGT)n	1.23
(AGCTCTC)n	1.23
(ATGAG)n	1.23
(ATTTTGT)n	1.23
(CAACGGGA)n	1.23
(CCCACCA)n	1.23
(CCCACT)n	1.23
(CCCGATT)n	1.23
(CCCTCT)n	1.23
(CCTA)n	1.23
(CCTCA)n	1.23
(CTAGTAGAC)n	1.23
(CTCCGAG)n	1.23
(CTCGCTTTTC)n	1.23
(CTGGTCT)n	1.23
(GAAAT)n	1.23
(GAATATG)n	1.23
(GAGAAGC)n	1.23
(GATGGAC)n	1.23
(GCCGTC)n	1.23
(GCCTCC)n	1.23
(GGCTTC)n	1.23
(GGGTTTG)n	1.23
(GGTGTA)n	1.23
(GTCAGAG)n	1.23
(TAAACG)n	1.23
(TCAAGT)n	1.23
(TCCAAGC)n	1.23
(TCGCGC)n	1.23
(TCTCCAC)n	1.23
(TCTGA)n	1.23
(TGGCCAGAA)n	1.23
(TGGTCC)n	1.23
(TGTAAG)n	1.23
(TGTGC)n	1.23
(TTATTAA)n	1.23
(TTGTTGG)n	1.23
BEL-17_DEl-I	1.23
DMCR1A	1.23
FW3_DM	1.23
Gypsy-10_DWil-I	1.23
Gypsy-13_DFi-I	1.23
Gypsy-14_DTa-I	1.23
[truncated: 8,101 more rows]
