# Supplementary material for: Heterochromatin-dependent transcription of satellite DNAs in the Drosophila melanogaster female germline
Source: eLife journal article supplement (doi:10.7554/elife.62375), 2021-07-13
Supplement: supp [file elife-62375-supp-v1.zip › elife_poa_e62375_Figure_3_figure_supplement_2_source_data_1.xlsx]

## Sheet: RDC
Figure 3-figure supplement 2-source data. Log2 fold changes of total RNA abundance for piRNA clusters from RDC and Moon mutants. Data from (Mohn, et al. 2014).
protein	repeatID	baseMean	log2FoldChange	lfcSE	stat	pvalue	padj	note
Cutoff	piRNA_cluster_42AB.47	347.12	5.70509	0.682936	8.35377	6.61205e-17	2.23487e-14	piRNA_cluster_42AB
Cutoff	piRNA_cluster_42AB.46	309.89	5.80568	0.735388	7.89472	2.9096e-15	4.91723e-13	piRNA_cluster_42AB
Cutoff	piRNA_cluster_42AB.251	224.461	3.63571	0.697169	5.21497	1.8385e-07	2.07138e-05	piRNA_cluster_42AB
Cutoff	piRNA_cluster_42AB.89	84.4369	-6.12185	1.29586	-4.72417	2.31062e-06	0.000171495	piRNA_cluster_42AB
Cutoff	piRNA_cluster_42AB.74	127.96	-10.1696	2.16137	-4.70514	2.5369e-06	0.000171495	piRNA_cluster_42AB
Cutoff	piRNA_cluster_42AB.73	90.9677	-9.67534	2.17231	-4.45395	8.43064e-06	0.000474926	piRNA_cluster_42AB
Cutoff	piRNA_cluster_20A.26	538.626	2.87313	0.654044	4.39287	1.11865e-05	0.000540151	piRNA_cluster_20A
Cutoff	piRNA_cluster_20A.25	488.369	2.69001	0.61938	4.34307	1.40505e-05	0.000593632	piRNA_cluster_20A
Cutoff	piRNA_cluster_42AB.87	61.6952	-5.66716	1.32989	-4.26137	2.03173e-05	0.000763028	piRNA_cluster_42AB
Cutoff	piRNA_cluster_42AB.75	57.6235	-4.97093	1.17945	-4.21462	2.50202e-05	0.000802888	piRNA_cluster_42AB
Cutoff	piRNA_cluster_38C2.34	32.0891	4.93856	1.17917	4.18818	2.81202e-05	0.000802888	piRNA_cluster_38C2
Cutoff	piRNA_cluster_42AB.71	70.9403	-6.86851	1.64119	-4.18509	2.85049e-05	0.000802888	piRNA_cluster_42AB
Cutoff	piRNA_cluster_42AB.88	70.4314	-6.86362	1.65523	-4.14662	3.37416e-05	0.000877283	piRNA_cluster_42AB
Cutoff	piRNA_cluster_42AB.52	59.7935	-9.08225	2.24043	-4.0538	5.03923e-05	0.00121661	piRNA_cluster_42AB
Cutoff	piRNA_cluster_42AB.250	83.1553	3.46461	0.858448	4.0359	5.4394e-05	0.00122568	piRNA_cluster_42AB
Cutoff	piRNA_cluster_42AB.90	52.9576	-8.90315	2.22332	-4.00444	6.21635e-05	0.0013132	piRNA_cluster_42AB
Cutoff	piRNA_cluster_42AB.86	44.6462	-8.65819	2.24142	-3.86281	0.000112091	0.00222863	piRNA_cluster_42AB
Cutoff	piRNA_cluster_42AB.76	42.4239	-8.58446	2.24595	-3.8222	0.000132265	0.00248364	piRNA_cluster_42AB
Cutoff	piRNA_cluster_38C1.7	59.1914	3.31076	0.871512	3.79888	0.000145354	0.00258576	piRNA_cluster_38C1
Cutoff	piRNA_cluster_42AB.208	48.4688	-4.29584	1.14234	-3.76055	0.000169537	0.00286518	piRNA_cluster_42AB
Cutoff	piRNA_cluster_42AB.78	34.5608	-8.29385	2.28558	-3.62877	0.000284772	0.00458347	piRNA_cluster_42AB
Cutoff	piRNA_cluster_42AB.207	32.4882	-8.19769	2.27306	-3.60646	0.000310401	0.00476888	piRNA_cluster_42AB
Cutoff	piRNA_cluster_80F.20	37.5588	-4.93588	1.3817	-3.57233	0.000353821	0.00519964	piRNA_cluster_80F
Cutoff	piRNA_cluster_42AB.191	31.6607	-8.16948	2.30545	-3.54356	0.00039477	0.00555164	piRNA_cluster_42AB
Cutoff	piRNA_cluster_42AB.50	30.0067	-8.08518	2.28837	-3.53316	0.000410624	0.00555164	piRNA_cluster_42AB
Cutoff	piRNA_cluster_38C1.17	29.9568	-8.08555	2.29542	-3.52247	0.000427545	0.00555809	piRNA_cluster_38C1
Cutoff	piRNA_cluster_42AB.223	27.4657	-7.94946	2.29236	-3.46781	0.000524716	0.00628004	piRNA_cluster_42AB
Cutoff	piRNA_cluster_42AB.194	37.8338	-5.96127	1.72074	-3.46435	0.000531506	0.00628004	piRNA_cluster_42AB
Cutoff	piRNA_cluster_42AB.77	40.7232	-6.07849	1.75645	-3.46068	0.00053882	0.00628004	piRNA_cluster_42AB
Cutoff	piRNA_cluster_20A.32	181.249	2.3641	0.68933	3.42956	0.000604557	0.00659602	piRNA_cluster_20A
Cutoff	piRNA_cluster_42AB.215	26.6084	-7.91178	2.30706	-3.42938	0.00060496	0.00659602	piRNA_cluster_42AB
Cutoff	piRNA_cluster_42AB.219	44.0293	-4.58881	1.34466	-3.41262	0.00064341	0.00679602	piRNA_cluster_42AB
Cutoff	piRNA_cluster_42AB.51	25.5621	-7.85272	2.31184	-3.39674	0.00068195	0.00691918	piRNA_cluster_42AB
Cutoff	piRNA_cluster_42AB.45	40.1244	3.33899	0.984946	3.39002	0.000698867	0.00691918	piRNA_cluster_42AB
Cutoff	piRNA_cluster_42AB.224	35.7209	-5.88208	1.73978	-3.38094	0.000722385	0.00691918	piRNA_cluster_42AB
Cutoff	piRNA_cluster_42AB.59	24.7749	-7.80243	2.31152	-3.37545	0.000736954	0.00691918	piRNA_cluster_42AB
Cutoff	piRNA_cluster_20A.28	192.141	2.32685	0.705754	3.29697	0.000977355	0.00892827	piRNA_cluster_20A
Cutoff	piRNA_cluster_42AB.184	22.0044	-7.63092	2.33425	-3.26911	0.00107887	0.00959625	piRNA_cluster_42AB
Cutoff	piRNA_cluster_42AB.259	70.4055	2.78529	0.85714	3.24952	0.00115601	0.00988328	piRNA_cluster_42AB
Cutoff	piRNA_cluster_42AB.15	36.9492	-3.87234	1.19289	-3.24619	0.00116962	0.00988328	piRNA_cluster_42AB
Cutoff	piRNA_cluster_42AB.188	21.3267	-7.5895	2.34393	-3.23794	0.00120397	0.00992544	piRNA_cluster_42AB
Cutoff	piRNA_cluster_42AB.183	31.1903	-4.67376	1.44792	-3.22791	0.00124696	0.0100351	piRNA_cluster_42AB
Cutoff	piRNA_cluster_42AB.70	21.3065	-7.59922	2.36821	-3.20885	0.00133268	0.0104755	piRNA_cluster_42AB
Cutoff	piRNA_cluster_42AB.69	20.36	-7.5234	2.3549	-3.19478	0.00139936	0.010705	piRNA_cluster_42AB
Cutoff	piRNA_cluster_20A.22	4221.22	2.01588	0.632037	3.18949	0.00142522	0.010705	piRNA_cluster_20A
Cutoff	piRNA_cluster_42AB.216	34.1638	-4.21291	1.32747	-3.17364	0.00150538	0.0110613	piRNA_cluster_42AB
Cutoff	piRNA_cluster_80F.23	29.5521	-5.60689	1.77317	-3.16208	0.00156648	0.0112653	piRNA_cluster_80F
Cutoff	piRNA_cluster_42AB.220	49.1574	-3.48967	1.11823	-3.1207	0.0018042	0.0127046	piRNA_cluster_42AB
Cutoff	piRNA_cluster_42AB.185	31.9914	-4.11373	1.32541	-3.10373	0.00191095	0.0130398	piRNA_cluster_42AB
Cutoff	piRNA_cluster_20A.23	2198.75	2.07742	0.670021	3.10053	0.00193174	0.0130398	piRNA_cluster_20A
Cutoff	piRNA_cluster_42AB.190	18.1876	-7.35274	2.37562	-3.09509	0.00196755	0.0130398	piRNA_cluster_42AB
Cutoff	piRNA_cluster_20A.24	801.02	1.85915	0.606879	3.06347	0.00218788	0.0142212	piRNA_cluster_20A
Cutoff	piRNA_cluster_80F.14	26.786	-4.42915	1.45601	-3.04198	0.00235026	0.0149884	piRNA_cluster_80F
Cutoff	piRNA_cluster_42AB.68	16.882	-7.24827	2.39561	-3.02565	0.002481	0.0154032	piRNA_cluster_42AB
Cutoff	piRNA_cluster_42AB.174	16.8523	-7.23507	2.39612	-3.0195	0.00253196	0.0154032	piRNA_cluster_42AB
Cutoff	piRNA_cluster_42AB.193	16.7524	-7.24024	2.39973	-3.01711	0.00255201	0.0154032	piRNA_cluster_42AB
Cutoff	piRNA_cluster_42AB.72	25.1574	-5.3669	1.7955	-2.98908	0.00279819	0.0165928	piRNA_cluster_42AB
Cutoff	piRNA_cluster_42AB.214	25.8447	-5.41798	1.82209	-2.9735	0.00294423	0.0170765	piRNA_cluster_42AB
Cutoff	piRNA_cluster_42AB.217	36.7825	-3.56038	1.2007	-2.96524	0.00302442	0.0170765	piRNA_cluster_42AB
Cutoff	piRNA_cluster_42AB.187	26.7754	-4.45345	1.50334	-2.96237	0.00305277	0.0170765	piRNA_cluster_42AB
Cutoff	piRNA_cluster_80F.24	15.756	-7.14138	2.41307	-2.95945	0.00308185	0.0170765	piRNA_cluster_80F
Cutoff	piRNA_cluster_42AB.60	24.8483	-5.35653	1.81393	-2.95299	0.00314708	0.0171567	piRNA_cluster_42AB
Cutoff	piRNA_cluster_42AB.241	15.4469	-7.12694	2.42587	-2.93789	0.00330451	0.0177289	piRNA_cluster_42AB
Cutoff	piRNA_cluster_42AB.55	15.3375	-7.10095	2.42107	-2.93297	0.00335733	0.0177309	piRNA_cluster_42AB
Cutoff	piRNA_cluster_42AB.67	15.2376	-7.10674	2.42894	-2.92586	0.00343501	0.017862	piRNA_cluster_42AB
Cutoff	piRNA_cluster_42AB.239	23.7127	-5.26582	1.80638	-2.91513	0.00355544	0.018035	piRNA_cluster_42AB
Cutoff	piRNA_cluster_42AB.246	15.108	-7.09775	2.43623	-2.91342	0.00357499	0.018035	piRNA_cluster_42AB
Cutoff	piRNA_cluster_42AB.205	14.869	-7.06249	2.4298	-2.90662	0.00365359	0.0181605	piRNA_cluster_42AB
Cutoff	piRNA_cluster_42AB.180	23.3738	-5.24639	1.80857	-2.90086	0.00372144	0.0182297	piRNA_cluster_42AB
Cutoff	piRNA_cluster_80F.21	24.075	-4.28425	1.48901	-2.87725	0.00401157	0.0193702	piRNA_cluster_80F
Cutoff	piRNA_cluster_42AB.48	15.0081	-7.10045	2.47592	-2.8678	0.00413333	0.019677	piRNA_cluster_42AB
Cutoff	piRNA_cluster_80F.22	14.1912	-7.00116	2.44692	-2.86121	0.00422023	0.0198116	piRNA_cluster_80F
Cutoff	piRNA_cluster_38C2.43	14.221	-7.01582	2.46486	-2.84633	0.0044226	0.0204773	piRNA_cluster_38C2
Cutoff	piRNA_cluster_80F.32	23.4472	-4.24403	1.49489	-2.83903	0.00452505	0.0206685	piRNA_cluster_80F
Cutoff	piRNA_cluster_42AB.222	21.8388	-5.16166	1.8303	-2.82011	0.00480066	0.021635	piRNA_cluster_42AB
Cutoff	piRNA_cluster_42AB.206	23.0584	-4.22576	1.51166	-2.79545	0.00518276	0.0230497	piRNA_cluster_42AB
Cutoff	piRNA_cluster_42AB.240	21.7389	-5.16418	1.85295	-2.78701	0.00531973	0.0233515	piRNA_cluster_42AB
Cutoff	piRNA_cluster_42AB.186	21.6093	-5.15736	1.86194	-2.76989	0.00560759	0.0241398	piRNA_cluster_42AB
Cutoff	piRNA_cluster_38C1.15	22.3212	-4.16615	1.50518	-2.76788	0.00564214	0.0241398	piRNA_cluster_38C1
Cutoff	piRNA_cluster_42AB.192	29.1052	-3.54373	1.28496	-2.75785	0.00581826	0.0243759	piRNA_cluster_42AB
Cutoff	piRNA_cluster_42AB.227	21.1111	-5.12069	1.85765	-2.75654	0.00584157	0.0243759	piRNA_cluster_42AB
Cutoff	piRNA_cluster_42AB.41	36.293	-3.00332	1.09137	-2.75189	0.00592529	0.0244238	piRNA_cluster_42AB
Cutoff	piRNA_cluster_flamenco.116	62.109	2.31946	0.848531	2.7335	0.00626657	0.0254295	piRNA_cluster_flamenco
Cutoff	piRNA_cluster_42AB.56	21.3501	-5.14324	1.88348	-2.73071	0.00631976	0.0254295	piRNA_cluster_42AB
Cutoff	piRNA_cluster_80F.3	515.956	1.81883	0.673223	2.70167	0.00689918	0.0269408	piRNA_cluster_80F
Cutoff	piRNA_cluster_42AB.66	11.9689	-6.75197	2.50075	-2.69998	0.00693446	0.0269408	piRNA_cluster_42AB
Cutoff	piRNA_cluster_38C1.13	11.8393	-6.74088	2.50766	-2.68811	0.00718568	0.0275995	piRNA_cluster_38C1
Cutoff	piRNA_cluster_42AB.226	11.869	-6.75858	2.53227	-2.66898	0.00760828	0.028846	piRNA_cluster_42AB
Cutoff	piRNA_cluster_42AB.179	11.5504	-6.69875	2.51286	-2.66578	0.00768089	0.028846	piRNA_cluster_42AB
Cutoff	piRNA_cluster_20A.21	6158.61	1.53336	0.586951	2.61241	0.00899069	0.033394	piRNA_cluster_20A
Cutoff	piRNA_cluster_42AB.58	19.6304	-3.97744	1.54629	-2.57224	0.0101042	0.0371074	piRNA_cluster_42AB
Cutoff	piRNA_cluster_38C1.19	10.4541	-6.56122	2.55436	-2.56863	0.01021	0.0371074	piRNA_cluster_38C1
Cutoff	piRNA_cluster_38C1.2	10.3245	-6.5485	2.56527	-2.55275	0.0106877	0.0383815	piRNA_cluster_38C1
Cutoff	piRNA_cluster_42AB.249	10.2448	-6.5311	2.56172	-2.5495	0.0107877	0.0383815	piRNA_cluster_42AB
Cutoff	piRNA_cluster_80F.8	344.11	1.71203	0.674691	2.5375	0.0111646	0.0393088	piRNA_cluster_80F
Cutoff	piRNA_cluster_20A.27	97.7261	2.04506	0.808509	2.52942	0.011425	0.0398109	piRNA_cluster_20A
Cutoff	piRNA_cluster_42AB.49	16.9257	-4.78997	1.90265	-2.51752	0.0118184	0.040206	piRNA_cluster_42AB
Cutoff	piRNA_cluster_42AB.238	16.846	-4.77926	1.89973	-2.51575	0.0118778	0.040206	piRNA_cluster_42AB
Cutoff	piRNA_cluster_42AB.176	9.98559	-6.50487	2.58619	-2.51524	0.0118953	0.040206	piRNA_cluster_42AB
Cutoff	piRNA_cluster_80F.25	11.1223	-6.60369	2.63642	-2.5048	0.0122522	0.0406003	piRNA_cluster_80F
Cutoff	piRNA_cluster_80F.29	9.79651	-6.44459	2.58359	-2.49443	0.0126159	0.0411366	piRNA_cluster_80F
Cutoff	piRNA_cluster_38C2.22	16.2979	-4.73285	1.9123	-2.47496	0.0133253	0.0428946	piRNA_cluster_38C2
Cutoff	piRNA_cluster_38C2.44	9.58724	-6.41183	2.59449	-2.47133	0.0134612	0.0429233	piRNA_cluster_38C2
Cutoff	piRNA_cluster_38C2.23	9.32804	-6.38409	2.59825	-2.45708	0.0140073	0.0438376	piRNA_cluster_38C2
Cutoff	piRNA_cluster_42AB.195	16.5666	-4.77559	1.96841	-2.42612	0.0152613	0.0473239	piRNA_cluster_42AB
Cutoff	piRNA_cluster_80F.44	3172.14	1.48635	0.61638	2.41142	0.0158906	0.0488124	piRNA_cluster_80F
Cutoff	piRNA_cluster_42AB.245	15.7795	-4.69816	1.95088	-2.40823	0.0160301	0.0488124	piRNA_cluster_42AB
Cutoff	piRNA_cluster_38C2.37	15.2515	-4.63217	1.93084	-2.39905	0.0164379	0.0496072	piRNA_cluster_38C2
Cutoff	piRNA_cluster_42AB.221	19.724	-3.37601	1.4276	-2.36481	0.0180392	0.0539578	piRNA_cluster_42AB
Cutoff	piRNA_cluster_38C1.16	8.49095	-6.24212	2.64368	-2.36115	0.0182185	0.0540162	piRNA_cluster_38C1
Cutoff	piRNA_cluster_80F.43	2230.62	1.45256	0.618529	2.34841	0.0188539	0.0554141	piRNA_cluster_80F
Cutoff	piRNA_cluster_42AB.57	8.47075	-6.275	2.6763	-2.34466	0.0190446	0.0554921	piRNA_cluster_42AB
Cutoff	piRNA_cluster_80F.50	1870.19	1.35108	0.581118	2.32498	0.0200732	0.0573896	piRNA_cluster_80F
Cutoff	piRNA_cluster_80F.15	14.4441	-4.56215	1.96295	-2.32413	0.0201184	0.0573896	piRNA_cluster_80F
Cutoff	piRNA_cluster_42AB.252	38.8072	2.23225	0.961137	2.32251	0.0202052	0.0573896	piRNA_cluster_42AB
Cutoff	piRNA_cluster_42AB.218	54.8312	-2.19263	0.945507	-2.319	0.0203951	0.0574461	piRNA_cluster_42AB
Cutoff	piRNA_cluster_38C2.25	14.2349	-4.54016	1.96695	-2.30822	0.0209867	0.058624	piRNA_cluster_38C2
Cutoff	piRNA_cluster_42AB.213	8.05221	-6.20078	2.69685	-2.29927	0.0214895	0.0591949	piRNA_cluster_42AB
Cutoff	piRNA_cluster_20A.20	3623.3	1.31038	0.570137	2.29836	0.0215414	0.0591949	piRNA_cluster_20A
Cutoff	piRNA_cluster_38C2.24	7.55399	-6.09929	2.70962	-2.25097	0.0243872	0.0664748	piRNA_cluster_38C2
Cutoff	piRNA_cluster_42AB.19	21.4025	-3.03964	1.36677	-2.22396	0.0261511	0.0701513	piRNA_cluster_42AB
Cutoff	piRNA_cluster_80F.30	13.3882	-4.40856	2.00506	-2.19871	0.0278982	0.0742488	piRNA_cluster_80F
Cutoff	piRNA_cluster_38C2.19	7.05578	-5.98887	2.73601	-2.18891	0.0286035	0.0749455	piRNA_cluster_38C2
Cutoff	piRNA_cluster_42AB.149	7.37446	-6.08496	2.79141	-2.17989	0.0292658	0.0760911	piRNA_cluster_42AB
Cutoff	piRNA_cluster_42AB.65	6.95591	-6.00036	2.81788	-2.12939	0.0332218	0.0857174	piRNA_cluster_42AB
Cutoff	piRNA_cluster_42AB.244	6.50763	-5.87763	2.78478	-2.11063	0.0348042	NA	piRNA_cluster_42AB
Cutoff	piRNA_cluster_38C2.18	6.50763	-5.87763	2.78478	-2.11063	0.0348042	NA	piRNA_cluster_38C2
Cutoff	piRNA_cluster_42AB.182	14.3285	-3.51808	1.67718	-2.09761	0.0359396	0.0910313	piRNA_cluster_42AB
Cutoff	piRNA_cluster_80F.4	52.4523	1.85729	0.886706	2.0946	0.0362065	0.0910313	piRNA_cluster_80F
Cutoff	piRNA_cluster_42AB.225	16.774	-3.13989	1.50026	-2.09289	0.0363586	0.0910313	piRNA_cluster_42AB
Cutoff	piRNA_cluster_42AB.2	499.439	1.27368	0.610253	2.08714	0.0368759	0.0916474	piRNA_cluster_42AB
Cutoff	piRNA_cluster_38C2.92	6.37803	-5.85758	2.80677	-2.08695	0.0368929	NA	piRNA_cluster_38C2
Cutoff	piRNA_cluster_38C2.85	6.4577	-5.88489	2.82073	-2.0863	0.0369514	NA	piRNA_cluster_38C2
Cutoff	piRNA_cluster_38C1.29	6.39822	-5.81109	2.83195	-2.05198	0.0401719	NA	piRNA_cluster_38C1
Cutoff	piRNA_cluster_38C2.17	6.13902	-5.76843	2.82281	-2.0435	0.0410027	NA	piRNA_cluster_38C2
Cutoff	piRNA_cluster_38C2.20	6.00942	-5.7473	2.82966	-2.03109	0.042246	NA	piRNA_cluster_38C2
Cutoff	piRNA_cluster_42AB.150	6.40777	-5.88705	2.91619	-2.01875	0.0435135	NA	piRNA_cluster_42AB
Cutoff	piRNA_cluster_42AB.181	5.87982	-5.7259	2.84352	-2.01367	0.0440444	NA	piRNA_cluster_42AB
Cutoff	piRNA_cluster_38C2.14	6.05935	-5.73768	2.84991	-2.01329	0.0440844	NA	piRNA_cluster_38C2
Cutoff	piRNA_cluster_38C2.8	6.18895	-5.76022	2.86176	-2.01283	0.044133	NA	piRNA_cluster_38C2
Cutoff	piRNA_cluster_38C1.26	5.92975	-5.71562	2.84726	-2.00741	0.0447062	NA	piRNA_cluster_38C1
Cutoff	piRNA_cluster_42AB.189	5.90955	-5.76373	2.90018	-1.98737	0.0468812	NA	piRNA_cluster_42AB
Cutoff	piRNA_cluster_38C1.22	5.54094	-5.64879	2.88744	-1.95633	0.0504261	NA	piRNA_cluster_38C1
Cutoff	piRNA_cluster_38C2.91	5.54094	-5.64879	2.88744	-1.95633	0.0504261	NA	piRNA_cluster_38C2
Cutoff	piRNA_cluster_42AB.175	5.46127	-5.61496	2.89062	-1.94248	0.0520793	NA	piRNA_cluster_42AB
Cutoff	piRNA_cluster_38C1.21	10.2587	-4.0394	2.08333	-1.93892	0.0525114	0.126824	piRNA_cluster_38C1
Cutoff	piRNA_cluster_38C2.84	5.41134	-5.62518	2.91897	-1.92711	0.0539662	NA	piRNA_cluster_38C2
Cutoff	piRNA_cluster_80F.31	10.0994	-4.00085	2.0982	-1.90681	0.0565458	0.135549	piRNA_cluster_80F
Cutoff	piRNA_cluster_38C1.24	5.17233	-5.51964	2.93572	-1.88017	0.0600853	NA	piRNA_cluster_38C1
Cutoff	piRNA_cluster_38C2.74	9.71056	-3.96144	2.10958	-1.87783	0.0604039	0.143778	piRNA_cluster_38C2
Cutoff	piRNA_cluster_20A.18	868.281	1.17586	0.630035	1.86634	0.0619944	0.146532	piRNA_cluster_20A
Cutoff	piRNA_cluster_38C2.3	5.04273	-5.49468	2.94602	-1.86512	0.0621644	NA	piRNA_cluster_38C2
Cutoff	piRNA_cluster_20A.19	426.92	1.20901	0.653541	1.84994	0.0643221	0.150978	piRNA_cluster_20A
Cutoff	piRNA_cluster_38C1.30	4.83345	-5.43052	2.97756	-1.82382	0.0681796	NA	piRNA_cluster_38C1
Cutoff	piRNA_cluster_80F.26	5.35186	-5.53909	3.04011	-1.82201	0.0684539	NA	piRNA_cluster_80F
Cutoff	piRNA_cluster_42AB.228	9.24208	-3.89991	2.14406	-1.81894	0.0689206	0.160656	piRNA_cluster_42AB
Cutoff	piRNA_cluster_38C2.1	4.70385	-5.40404	2.99709	-1.80309	0.0713737	NA	piRNA_cluster_38C2
Cutoff	piRNA_cluster_38C2.39	4.70385	-5.40404	2.99709	-1.80309	0.0713737	NA	piRNA_cluster_38C2
Cutoff	piRNA_cluster_38C1.14	4.62418	-5.36337	3.01218	-1.78056	0.0749844	NA	piRNA_cluster_38C1
Cutoff	piRNA_cluster_42AB.136	4.57425	-5.37669	3.02853	-1.77534	0.0758412	NA	piRNA_cluster_42AB
Cutoff	piRNA_cluster_20A.31	261.435	1.12595	0.642869	1.75145	0.0798678	0.184899	piRNA_cluster_20A
Cutoff	piRNA_cluster_38C2.2	4.54451	-5.32181	3.04646	-1.74689	0.0806569	NA	piRNA_cluster_38C2
Cutoff	piRNA_cluster_38C2.4	4.54451	-5.32181	3.04646	-1.74689	0.0806569	NA	piRNA_cluster_38C2
Cutoff	piRNA_cluster_38C2.13	4.44465	-5.34785	3.07672	-1.73817	0.0821812	NA	piRNA_cluster_38C2
Cutoff	piRNA_cluster_42AB.235	8.5346	-3.7689	2.17328	-1.7342	0.0828828	0.18927	piRNA_cluster_42AB
Cutoff	piRNA_cluster_42AB.237	8.5346	-3.7689	2.17328	-1.7342	0.0828828	0.18927	piRNA_cluster_42AB
Cutoff	piRNA_cluster_42AB.23	22.1209	-2.26322	1.3074	-1.73109	0.0834358	0.18927	piRNA_cluster_42AB
Cutoff	piRNA_cluster_42AB.1	529.994	1.09949	0.642525	1.7112	0.0870447	0.196141	piRNA_cluster_42AB
Cutoff	piRNA_cluster_flamenco.8	145.554	1.18009	0.691787	1.70586	0.0880345	0.197057	piRNA_cluster_flamenco
Cutoff	piRNA_cluster_38C2.16	4.15571	-5.23402	3.0994	-1.68872	0.0912736	NA	piRNA_cluster_38C2
Cutoff	piRNA_cluster_42AB.242	10.5116	-3.0458	1.81336	-1.67964	0.0930271	0.20504	piRNA_cluster_42AB
Cutoff	piRNA_cluster_38C1.9	14.8248	-2.4873	1.48116	-1.6793	0.0930943	0.20504	piRNA_cluster_38C1
Cutoff	piRNA_cluster_42AB.178	8.16598	-3.68152	2.2045	-1.67	0.0949194	0.20504	piRNA_cluster_42AB
Cutoff	piRNA_cluster_flamenco.205	26.1083	1.85754	1.11338	1.66838	0.0952406	0.20504	piRNA_cluster_flamenco
Cutoff	piRNA_cluster_38C1.11	3.99637	-5.14081	3.1404	-1.63699	0.101633	NA	piRNA_cluster_38C1
Cutoff	piRNA_cluster_38C1.25	3.99637	-5.14081	3.1404	-1.63699	0.101633	NA	piRNA_cluster_38C1
Cutoff	piRNA_cluster_42AB.177	7.82711	-3.62376	2.22185	-1.63097	0.102897	0.220122	piRNA_cluster_42AB
Cutoff	piRNA_cluster_38C2.80	3.86676	-5.10847	3.15452	-1.61941	0.105359	NA	piRNA_cluster_38C2
Cutoff	piRNA_cluster_80F.28	12.2794	-2.66542	1.64712	-1.61823	0.105613	0.22451	piRNA_cluster_80F
Cutoff	piRNA_cluster_80F.12	31.7556	-1.69834	1.0529	-1.61302	0.106741	0.22549	piRNA_cluster_80F
Cutoff	piRNA_cluster_38C2.95	3.81683	-5.12411	3.19019	-1.60621	0.108227	NA	piRNA_cluster_38C2
Cutoff	piRNA_cluster_flamenco.163	5.81235	3.36112	2.13688	1.57291	0.115739	NA	piRNA_cluster_flamenco
Cutoff	piRNA_cluster_42AB.43	16.3238	-2.26557	1.44179	-1.57136	0.116098	0.243566	piRNA_cluster_42AB
Cutoff	piRNA_cluster_38C2.6	3.65749	-5.02396	3.20533	-1.56738	0.117027	NA	piRNA_cluster_38C2
Cutoff	piRNA_cluster_flamenco.41	59.763	1.32006	0.846708	1.55904	0.118986	0.244255	piRNA_cluster_flamenco
Cutoff	piRNA_cluster_42AB.141	3.60756	-5.04097	3.23597	-1.55779	0.119282	NA	piRNA_cluster_42AB
Cutoff	piRNA_cluster_flamenco.115	14.5324	2.21221	1.42355	1.55401	0.120181	0.244255	piRNA_cluster_flamenco
Cutoff	piRNA_cluster_42AB.3	229.439	1.04641	0.674253	1.55195	0.120673	0.244255	piRNA_cluster_42AB
Cutoff	piRNA_cluster_80F.37	15.8553	-2.22495	1.43566	-1.54978	0.121194	0.244255	piRNA_cluster_80F
Cutoff	piRNA_cluster_80F.34	15.4962	-2.2154	1.4303	-1.5489	0.121405	0.244255	piRNA_cluster_80F
Cutoff	piRNA_cluster_38C1.6	7.14936	-3.5013	2.27007	-1.54237	0.122984	0.245967	piRNA_cluster_38C1
Cutoff	piRNA_cluster_42AB.247	3.52789	-4.98907	3.23557	-1.54195	0.123086	NA	piRNA_cluster_42AB
Cutoff	piRNA_cluster_38C2.15	3.52789	-4.98907	3.23557	-1.54195	0.123086	NA	piRNA_cluster_38C2
Cutoff	piRNA_cluster_flamenco.129	32.91	1.55652	1.01318	1.53627	0.124472	0.246328	piRNA_cluster_flamenco
Cutoff	piRNA_cluster_42AB.16	32.2475	-1.61943	1.05783	-1.5309	0.125795	0.247202	piRNA_cluster_42AB
Cutoff	piRNA_cluster_38C2.42	11.6813	-2.60104	1.72612	-1.50688	0.131842	0.256332	piRNA_cluster_38C2
Cutoff	piRNA_cluster_38C1.3	3.39829	-4.95268	3.28705	-1.50673	0.131881	NA	piRNA_cluster_38C1
Cutoff	piRNA_cluster_38C2.94	37.5052	1.48985	1.00008	1.48973	0.136295	0.263244	piRNA_cluster_38C2
Cutoff	piRNA_cluster_42AB.107	3.31862	-4.8971	3.29178	-1.48768	0.136836	NA	piRNA_cluster_42AB
Cutoff	piRNA_cluster_38C1.23	6.73082	-3.40606	2.30561	-1.47729	0.139598	0.268091	piRNA_cluster_38C1
Cutoff	piRNA_cluster_20A.53	238.732	-0.949687	0.64849	-1.46446	0.143069	0.270188	piRNA_cluster_20A
Cutoff	piRNA_cluster_42AB.20	26.496	-1.64725	1.12487	-1.46439	0.143088	0.270188	piRNA_cluster_42AB
Cutoff	piRNA_cluster_80F.9	115.187	1.0782	0.739124	1.45875	0.144634	0.27159	piRNA_cluster_80F
Cutoff	piRNA_cluster_42AB.142	3.26869	-4.91333	3.37547	-1.4556	0.145504	NA	piRNA_cluster_42AB
Cutoff	piRNA_cluster_42AB.197	6.52154	-3.35592	2.32526	-1.44325	0.148951	NA	piRNA_cluster_42AB
Cutoff	piRNA_cluster_42AB.196	47.4719	1.2836	0.89207	1.43889	0.15018	0.280447	piRNA_cluster_42AB
Cutoff	piRNA_cluster_flamenco.31	12.0438	2.10153	1.48988	1.41054	0.158382	0.29253	piRNA_cluster_flamenco
Cutoff	piRNA_cluster_flamenco.131	69.6186	1.29849	0.925561	1.40292	0.160641	0.29509	piRNA_cluster_flamenco
Cutoff	piRNA_cluster_flamenco.39	50.9493	1.22801	0.877824	1.39892	0.161836	0.295679	piRNA_cluster_flamenco
Cutoff	piRNA_cluster_42AB.198	2.97974	-4.75779	3.4085	-1.39586	0.162757	NA	piRNA_cluster_42AB
Cutoff	piRNA_cluster_flamenco.6	111.916	1.00758	0.72463	1.39048	0.164384	0.29872	piRNA_cluster_flamenco
Cutoff	piRNA_cluster_38C1.5	6.3622	-3.29183	2.36915	-1.38945	0.164694	NA	piRNA_cluster_38C1
Cutoff	piRNA_cluster_38C2.12	2.85014	-4.71366	3.50214	-1.34594	0.178322	NA	piRNA_cluster_38C2
Cutoff	piRNA_cluster_80F.11	48.2204	-1.27658	0.948629	-1.34571	0.178396	0.320733	piRNA_cluster_80F
Cutoff	piRNA_cluster_38C2.45	5.92346	-3.24125	2.41329	-1.34308	0.179244	NA	piRNA_cluster_38C2
Cutoff	piRNA_cluster_80F.5	52.626	1.2709	0.954709	1.33119	0.183125	0.32577	piRNA_cluster_80F
Cutoff	piRNA_cluster_20A.17	104.442	1.02804	0.775959	1.32486	0.185216	0.327765	piRNA_cluster_20A
Cutoff	piRNA_cluster_flamenco.27	22.6037	1.50318	1.1555	1.30089	0.193297	0.33852	piRNA_cluster_flamenco
Cutoff	piRNA_cluster_38C2.96	5.68445	-3.1356	2.42027	-1.29556	0.195127	NA	piRNA_cluster_38C2
Cutoff	piRNA_cluster_42AB.144	2.64087	-4.60226	3.57854	-1.28607	0.198419	NA	piRNA_cluster_42AB
Cutoff	piRNA_cluster_20A.57	48.1093	1.21038	0.942948	1.28361	0.199279	0.347198	piRNA_cluster_20A
Cutoff	piRNA_cluster_38C1.20	5.55485	-3.11307	2.43026	-1.28096	0.200207	NA	piRNA_cluster_38C1
Cutoff	piRNA_cluster_80F.35	19.2391	-1.59502	1.26635	-1.25954	0.207835	0.359259	piRNA_cluster_80F
Cutoff	piRNA_cluster_flamenco.106	38.6534	1.28857	1.02416	1.25818	0.208328	0.359259	piRNA_cluster_flamenco
Cutoff	piRNA_cluster_42AB.109	21.2765	1.47205	1.17844	1.24915	0.211608	0.363064	piRNA_cluster_42AB
Cutoff	piRNA_cluster_38C1.12	5.37532	-3.10256	2.50424	-1.23892	0.215373	NA	piRNA_cluster_38C1
Cutoff	piRNA_cluster_38C2.73	10.8284	-1.99484	1.63926	-1.21691	0.223637	0.381765	piRNA_cluster_38C2
Cutoff	piRNA_cluster_38C2.48	3.78595	3.115	2.58072	1.20703	0.227421	NA	piRNA_cluster_38C2
Cutoff	piRNA_cluster_42AB.28	17.2621	-1.60292	1.32991	-1.20528	0.228094	0.387416	piRNA_cluster_42AB
Cutoff	piRNA_cluster_38C2.38	12.9945	-1.96057	1.63512	-1.19904	0.230513	0.388601	piRNA_cluster_38C2
Cutoff	piRNA_cluster_42AB.9	21.4393	-1.4406	1.20592	-1.19461	0.232241	0.388601	piRNA_cluster_42AB
Cutoff	piRNA_cluster_42AB.53	5.24572	-3.07539	2.58184	-1.19116	0.23359	NA	piRNA_cluster_42AB
Cutoff	piRNA_cluster_42AB.234	7.03367	-2.40601	2.038	-1.18057	0.237772	0.395896	piRNA_cluster_42AB
Cutoff	piRNA_cluster_42AB.4	21.0006	-1.42235	1.23202	-1.15449	0.2483	0.411398	piRNA_cluster_42AB
Cutoff	piRNA_cluster_38C1.18	24.8793	-1.27305	1.14147	-1.11528	0.264732	0.43494	piRNA_cluster_38C1
Cutoff	piRNA_cluster_38C1.1	4.71776	-2.848	2.55519	-1.11459	0.265026	NA	piRNA_cluster_38C1
Cutoff	piRNA_cluster_flamenco.40	68.5194	0.899927	0.807501	1.11446	0.265082	0.43494	piRNA_cluster_flamenco
Cutoff	piRNA_cluster_42AB.140	2.30199	-4.41835	4.02576	-1.09752	0.272414	NA	piRNA_cluster_42AB
Cutoff	piRNA_cluster_38C2.71	2.30199	-4.41835	4.02576	-1.09752	0.272414	NA	piRNA_cluster_38C2
Cutoff	piRNA_cluster_80F.13	36.3647	-1.08117	0.987662	-1.09468	0.273657	0.444692	piRNA_cluster_80F
Cutoff	piRNA_cluster_42AB.260	68.6534	0.937365	0.866366	1.08195	0.279275	0.45165	piRNA_cluster_42AB
Cutoff	piRNA_cluster_flamenco.77	4.6806	2.62543	2.43745	1.07712	0.281427	NA	piRNA_cluster_flamenco
Cutoff	piRNA_cluster_42AB.40	43.6685	-1.07236	0.996741	-1.07587	0.281986	0.453863	piRNA_cluster_42AB
Cutoff	piRNA_cluster_20A.56	1284.92	0.573419	0.579944	0.988749	0.322786	0.514631	piRNA_cluster_20A
Cutoff	piRNA_cluster_flamenco.107	18.5148	1.20638	1.24794	0.966697	0.333695	0.525326	piRNA_cluster_flamenco
Cutoff	piRNA_cluster_80F.27	7.41619	-1.85175	1.92107	-0.963915	0.335089	0.525326	piRNA_cluster_80F
Cutoff	piRNA_cluster_80F.36	10.4535	-1.57957	1.64112	-0.962494	0.335801	0.525326	piRNA_cluster_80F
Cutoff	piRNA_cluster_flamenco.133	8.84965	1.63504	1.70391	0.959583	0.337265	0.525326	piRNA_cluster_flamenco
Cutoff	piRNA_cluster_42AB.236	3.91041	-2.60223	2.72404	-0.955287	0.339433	NA	piRNA_cluster_42AB
Cutoff	piRNA_cluster_flamenco.29	16.8925	1.26846	1.35379	0.93697	0.348774	0.540759	piRNA_cluster_flamenco
Cutoff	piRNA_cluster_flamenco.105	17.361	1.20357	1.28956	0.933324	0.350653	0.54119	piRNA_cluster_flamenco
Cutoff	piRNA_cluster_42AB.258	10.422	1.44217	1.57623	0.914949	0.360219	0.553427	piRNA_cluster_42AB
Cutoff	piRNA_cluster_20A.55	696.235	0.544476	0.602986	0.902966	0.366544	0.55905	piRNA_cluster_20A
Cutoff	piRNA_cluster_42AB.36	24.4185	-1.01709	1.13372	-0.89713	0.36965	0.560276	piRNA_cluster_42AB
Cutoff	piRNA_cluster_42AB.6	12.624	-1.30573	1.48601	-0.878683	0.379573	0.569875	piRNA_cluster_42AB
Cutoff	piRNA_cluster_42AB.110	37.9768	0.890991	1.01513	0.87771	0.380101	0.569875	piRNA_cluster_42AB
Cutoff	piRNA_cluster_20A.9	7.22712	-1.74834	2.04994	-0.852871	0.393731	0.583236	piRNA_cluster_20A
Cutoff	piRNA_cluster_42AB.44	8.21726	-1.55784	1.83027	-0.851156	0.394683	0.583236	piRNA_cluster_42AB
Cutoff	piRNA_cluster_flamenco.102	22.8793	0.98802	1.1662	0.847213	0.396876	0.583236	piRNA_cluster_flamenco
Cutoff	piRNA_cluster_42AB.111	4.75264	1.85683	2.22612	0.834114	0.404217	NA	piRNA_cluster_42AB
Cutoff	piRNA_cluster_flamenco.120	18.7165	1.0152	1.22932	0.825818	0.408907	0.597346	piRNA_cluster_flamenco
Cutoff	piRNA_cluster_flamenco.134	6.83717	1.45933	1.8787	0.776777	0.43729	0.631641	piRNA_cluster_flamenco
Cutoff	piRNA_cluster_42AB.10	6.80857	-1.64381	2.16082	-0.760732	0.446817	0.642656	piRNA_cluster_42AB
Cutoff	piRNA_cluster_flamenco.97	6.96049	1.53569	2.10174	0.730676	0.464977	0.665942	piRNA_cluster_flamenco
Cutoff	piRNA_cluster_flamenco.108	20.8668	0.860617	1.18791	0.724483	0.46877	0.666973	piRNA_cluster_flamenco
Cutoff	piRNA_cluster_38C1.4	4.55214	-1.7166	2.37208	-0.723667	0.46927	NA	piRNA_cluster_38C1
Cutoff	piRNA_cluster_flamenco.9	40.983	0.672561	0.931147	0.722292	0.470115	0.666973	piRNA_cluster_flamenco
Cutoff	piRNA_cluster_flamenco.7	129.858	0.510949	0.711511	0.718118	0.472685	0.666973	piRNA_cluster_flamenco
Cutoff	piRNA_cluster_80F.33	13.7279	-1.02042	1.42388	-0.716649	0.473591	0.666973	piRNA_cluster_80F
Cutoff	piRNA_cluster_flamenco.101	6.40471	1.36459	1.93732	0.704371	0.481202	NA	piRNA_cluster_flamenco
Cutoff	piRNA_cluster_42AB.35	25.3568	-0.781821	1.12517	-0.694846	0.487152	0.678598	piRNA_cluster_42AB
Cutoff	piRNA_cluster_20A.34	12.5287	1.01377	1.46138	0.693704	0.487868	0.678598	piRNA_cluster_20A
Cutoff	piRNA_cluster_80F.39	15.8484	-0.912274	1.33686	-0.682402	0.494985	0.685676	piRNA_cluster_80F
Cutoff	piRNA_cluster_flamenco.158	3.67846	1.81827	2.69349	0.67506	0.499638	NA	piRNA_cluster_flamenco
Cutoff	piRNA_cluster_flamenco.155	7.38531	1.22557	1.82118	0.672956	0.500975	0.691141	piRNA_cluster_flamenco
Cutoff	piRNA_cluster_42AB.26	5.69208	-1.41984	2.12575	-0.667923	0.504183	NA	piRNA_cluster_42AB
Cutoff	piRNA_cluster_flamenco.207	6.61398	1.25386	1.91271	0.655543	0.512118	NA	piRNA_cluster_flamenco
Cutoff	piRNA_cluster_flamenco.176	27.7035	-0.804286	1.22754	-0.655199	0.51234	0.703947	piRNA_cluster_flamenco
Cutoff	piRNA_cluster_80F.47	33.756	-0.691339	1.08073	-0.639698	0.522369	0.714821	piRNA_cluster_80F
Cutoff	piRNA_cluster_42AB.37	55.6318	-0.5477	0.866067	-0.632399	0.527126	0.716727	piRNA_cluster_42AB
Cutoff	piRNA_cluster_flamenco.25	93.9526	0.479873	0.762898	0.629014	0.52934	0.716727	piRNA_cluster_flamenco
Cutoff	piRNA_cluster_42AB.17	29.9804	-0.654617	1.0542	-0.62096	0.534626	0.719935	piRNA_cluster_42AB
Cutoff	piRNA_cluster_38C2.76	15.7594	0.791782	1.31941	0.600101	0.548439	0.732698	piRNA_cluster_38C2
Cutoff	piRNA_cluster_38C2.99	4.05393	-1.48706	2.47857	-0.599968	0.548528	NA	piRNA_cluster_38C2
Cutoff	piRNA_cluster_flamenco.154	14.1371	0.822162	1.37651	0.597279	0.550321	0.732698	piRNA_cluster_flamenco
Cutoff	piRNA_cluster_80F.40	26.3311	-0.671234	1.12802	-0.595053	0.551808	0.732698	piRNA_cluster_80F
Cutoff	piRNA_cluster_20A.54	445.301	0.360967	0.608091	0.593607	0.552775	0.732698	piRNA_cluster_20A
Cutoff	piRNA_cluster_flamenco.171	4.22661	1.3741	2.34522	0.585914	0.557933	NA	piRNA_cluster_flamenco
Cutoff	piRNA_cluster_42AB.18	11.4619	-0.883436	1.53603	-0.575144	0.565194	0.743329	piRNA_cluster_42AB
Cutoff	piRNA_cluster_flamenco.2	26.6572	-0.730441	1.28912	-0.566618	0.570973	0.74802	piRNA_cluster_flamenco
Cutoff	piRNA_cluster_flamenco.152	8.78446	0.950163	1.7131	0.554647	0.579136	0.75288	piRNA_cluster_flamenco
Cutoff	piRNA_cluster_80F.38	7.60336	-1.01536	1.83066	-0.554644	0.579138	0.75288	piRNA_cluster_80F
Cutoff	piRNA_cluster_42AB.24	5.06427	-1.20988	2.21157	-0.547071	0.58433	NA	piRNA_cluster_42AB
Cutoff	piRNA_cluster_42AB.54	3.71505	-1.35515	2.55227	-0.530958	0.595448	NA	piRNA_cluster_42AB
Cutoff	piRNA_cluster_80F.49	52.6753	-0.499009	0.940726	-0.530451	0.595799	0.768042	piRNA_cluster_80F
Cutoff	piRNA_cluster_flamenco.3	54.3836	-0.515743	0.977104	-0.527828	0.597619	0.768042	piRNA_cluster_flamenco
Cutoff	piRNA_cluster_38C2.46	13.0641	-0.737753	1.44385	-0.510963	0.609377	0.775853	piRNA_cluster_38C2
Cutoff	piRNA_cluster_42AB.42	17.5739	-0.684736	1.3414	-0.510463	0.609727	0.775853	piRNA_cluster_42AB
Cutoff	piRNA_cluster_20A.12	7.44402	-0.945883	1.85743	-0.509243	0.610582	0.775853	piRNA_cluster_20A
Cutoff	piRNA_cluster_42AB.21	14.0744	-0.709493	1.41461	-0.501547	0.615986	0.77934	piRNA_cluster_42AB
Cutoff	piRNA_cluster_42AB.31	6.00828	0.99284	1.9914	0.498563	0.618087	NA	piRNA_cluster_42AB
Cutoff	piRNA_cluster_80F.2	9.7948	0.795395	1.59988	0.497159	0.619077	0.77934	piRNA_cluster_80F
Cutoff	piRNA_cluster_flamenco.75	75.0223	2.40723	4.85814	0.495504	0.620244	0.77934	piRNA_cluster_flamenco
Cutoff	piRNA_cluster_38C2.75	9.51463	-0.799466	1.64919	-0.484762	0.627845	0.783069	piRNA_cluster_38C2
Cutoff	piRNA_cluster_42AB.14	3.50578	-1.2481	2.61051	-0.478107	0.632574	NA	piRNA_cluster_42AB
Cutoff	piRNA_cluster_flamenco.130	7.71028	0.84299	1.77394	0.475208	0.634639	0.785743	piRNA_cluster_flamenco
Cutoff	piRNA_cluster_flamenco.118	9.28268	0.759161	1.63772	0.463549	0.642971	0.793154	piRNA_cluster_flamenco
Cutoff	piRNA_cluster_20A.16	10.4952	-0.718915	1.58791	-0.452743	0.650734	0.794185	piRNA_cluster_20A
Cutoff	piRNA_cluster_flamenco.104	9.41228	0.742162	1.63987	0.452574	0.650855	0.794185	piRNA_cluster_flamenco
Cutoff	piRNA_cluster_42AB.22	13.556	-0.659955	1.52959	-0.431459	0.666134	0.803153	piRNA_cluster_42AB
Cutoff	piRNA_cluster_flamenco.26	53.2864	0.38794	0.907999	0.427247	0.669199	0.803153	piRNA_cluster_flamenco
Cutoff	piRNA_cluster_42AB.147	3.24658	-1.16992	2.74313	-0.426491	0.66975	NA	piRNA_cluster_42AB
Cutoff	piRNA_cluster_flamenco.100	3.28203	1.20383	2.83547	0.424562	0.671156	NA	piRNA_cluster_flamenco
Cutoff	piRNA_cluster_38C2.49	3.28203	1.20383	2.83547	0.424562	0.671156	NA	piRNA_cluster_38C2
Cutoff	piRNA_cluster_80F.41	27.0304	-0.463524	1.11285	-0.416521	0.677029	0.808607	piRNA_cluster_80F
Cutoff	piRNA_cluster_flamenco.161	4.39223	0.955413	2.30211	0.415015	0.678131	NA	piRNA_cluster_flamenco
Cutoff	piRNA_cluster_flamenco.135	14.4683	0.554722	1.38024	0.401903	0.687755	0.818526	piRNA_cluster_flamenco
Cutoff	piRNA_cluster_80F.45	42.8952	-0.377662	0.964421	-0.391595	0.695358	0.822881	piRNA_cluster_80F
Cutoff	piRNA_cluster_flamenco.212	7.87647	-0.701471	1.82316	-0.384756	0.700419	0.824883	piRNA_cluster_flamenco
Cutoff	piRNA_cluster_flamenco.117	12.9257	0.533339	1.42784	0.373529	0.708755	0.82865	piRNA_cluster_flamenco
Cutoff	piRNA_cluster_flamenco.136	5.54665	-0.796311	2.13529	-0.372928	0.709202	NA	piRNA_cluster_flamenco
Cutoff	piRNA_cluster_20A.59	8.67754	-0.615167	1.71331	-0.359051	0.719557	0.835774	piRNA_cluster_20A
Cutoff	piRNA_cluster_80F.42	25.1521	0.38866	1.10468	0.35183	0.724966	0.838321	piRNA_cluster_80F
Cutoff	piRNA_cluster_80F.10	42.3503	-0.32501	0.929916	-0.349505	0.72671	0.838321	piRNA_cluster_80F
Cutoff	piRNA_cluster_20A.1	4.27711	-0.837259	2.41776	-0.346295	0.729121	NA	piRNA_cluster_20A
Cutoff	piRNA_cluster_42AB.5	14.6801	-0.469058	1.38462	-0.338763	0.734788	0.843649	piRNA_cluster_42AB
Cutoff	piRNA_cluster_flamenco.4	84.1176	-0.269487	0.800307	-0.33673	0.736321	0.843649	piRNA_cluster_flamenco
Cutoff	piRNA_cluster_80F.6	30.1083	0.348542	1.05562	0.330178	0.741266	0.843689	piRNA_cluster_80F
Cutoff	piRNA_cluster_flamenco.46	3.83017	0.801296	2.45012	0.327043	0.743635	NA	piRNA_cluster_flamenco
Cutoff	piRNA_cluster_42AB.108	28.4063	0.356197	1.0916	0.326308	0.744192	0.843689	piRNA_cluster_42AB
Cutoff	piRNA_cluster_42AB.38	41.8818	-0.305874	0.938045	-0.326077	0.744366	0.843689	piRNA_cluster_42AB
Cutoff	piRNA_cluster_20A.15	4.94858	-0.635546	2.19107	-0.290062	0.771769	NA	piRNA_cluster_20A
Cutoff	piRNA_cluster_flamenco.151	5.25771	-0.672613	2.34455	-0.286884	0.774201	NA	piRNA_cluster_flamenco
Cutoff	piRNA_cluster_20A.8	6.00885	-0.571644	2.00494	-0.285118	0.775554	NA	piRNA_cluster_20A
Cutoff	piRNA_cluster_42AB.34	21.0355	-0.329228	1.21371	-0.271257	0.786194	0.877242	piRNA_cluster_42AB
Cutoff	piRNA_cluster_80F.1	4.81897	-0.606932	2.23772	-0.271228	0.786216	NA	piRNA_cluster_80F
Cutoff	piRNA_cluster_42AB.33	41.7959	-0.256737	0.952312	-0.269593	0.787473	0.877242	piRNA_cluster_42AB
Cutoff	piRNA_cluster_80F.7	40.8854	-0.25078	0.937109	-0.267611	0.788999	0.877242	piRNA_cluster_80F
Cutoff	piRNA_cluster_38C1.8	35.6189	0.246394	0.984104	0.250374	0.802298	0.889104	piRNA_cluster_38C1
Cutoff	piRNA_cluster_flamenco.76	3.67903	-0.626774	2.50675	-0.250034	0.802561	NA	piRNA_cluster_flamenco
Cutoff	piRNA_cluster_80F.48	27.7973	0.261988	1.10386	0.237338	0.812394	0.896332	piRNA_cluster_80F
Cutoff	piRNA_cluster_flamenco.132	7.65272	0.408159	1.7853	0.228622	0.819163	0.896332	piRNA_cluster_flamenco
Cutoff	piRNA_cluster_42AB.7	11.6428	-0.335506	1.50863	-0.222391	0.82401	0.896332	piRNA_cluster_42AB
Cutoff	piRNA_cluster_20A.60	11.0068	0.338216	1.52719	0.221464	0.824731	0.896332	piRNA_cluster_20A
Cutoff	piRNA_cluster_flamenco.92	4.53003	-0.454691	2.2679	-0.20049	0.841097	NA	piRNA_cluster_flamenco
Cutoff	piRNA_cluster_flamenco.148	4.57996	-0.419396	2.32417	-0.18045	0.8568	NA	piRNA_cluster_flamenco
Cutoff	piRNA_cluster_42AB.8	9.64366	0.283415	1.61369	0.175631	0.860583	0.92932	piRNA_cluster_42AB
Cutoff	piRNA_cluster_flamenco.119	7.27019	0.306443	1.85645	0.165069	0.868889	0.935301	piRNA_cluster_flamenco
Cutoff	piRNA_cluster_flamenco.5	125.726	-0.122608	0.763808	-0.160522	0.87247	0.935459	piRNA_cluster_flamenco
Cutoff	piRNA_cluster_flamenco.37	49.5357	-0.158105	1.00158	-0.157855	0.874571	0.935459	piRNA_cluster_flamenco
Cutoff	piRNA_cluster_flamenco.24	6.36926	0.279847	1.93561	0.144578	0.885044	NA	piRNA_cluster_flamenco
Cutoff	piRNA_cluster_flamenco.110	3.26049	-0.378526	2.62706	-0.144087	0.885431	NA	piRNA_cluster_flamenco
Cutoff	piRNA_cluster_38C2.21	24.344	-0.134758	1.12527	-0.119756	0.904677	0.960214	piRNA_cluster_38C2
Cutoff	piRNA_cluster_42AB.27	11.7143	0.171494	1.48975	0.115116	0.908353	0.960214	piRNA_cluster_42AB
Cutoff	piRNA_cluster_flamenco.114	3.94586	0.263771	2.43782	0.1082	0.913837	NA	piRNA_cluster_flamenco
Cutoff	piRNA_cluster_flamenco.113	6.15236	-0.207902	2.01792	-0.103028	0.917941	NA	piRNA_cluster_flamenco
Cutoff	piRNA_cluster_38C2.47	13.5181	-0.143684	1.41227	-0.10174	0.918963	0.967167	piRNA_cluster_38C2
Cutoff	piRNA_cluster_20A.10	8.9943	-0.167018	1.69954	-0.0982721	0.921716	0.967167	piRNA_cluster_20A
Cutoff	piRNA_cluster_20A.11	14.8654	0.113183	1.37725	0.0821805	0.934503	0.972817	piRNA_cluster_20A
Cutoff	piRNA_cluster_42AB.39	47.3952	-0.0731305	0.989367	-0.0739165	0.941077	0.972817	piRNA_cluster_42AB
Cutoff	piRNA_cluster_flamenco.38	37.8462	-0.0721505	0.976288	-0.0739029	0.941088	0.972817	piRNA_cluster_flamenco
Cutoff	piRNA_cluster_42AB.25	4.02553	0.192287	2.64691	0.0726458	0.942088	NA	piRNA_cluster_42AB
Cutoff	piRNA_cluster_42AB.29	22.5636	0.0817256	1.16421	0.0701983	0.944036	0.972817	piRNA_cluster_42AB
Cutoff	piRNA_cluster_flamenco.1	45.0228	-0.0533879	0.930646	-0.0573665	0.954253	0.980357	piRNA_cluster_flamenco
Cutoff	piRNA_cluster_flamenco.103	20.1902	0.0619368	1.2037	0.0514553	0.958963	0.981121	piRNA_cluster_flamenco
Cutoff	piRNA_cluster_flamenco.36	21.5956	-0.0555939	1.17707	-0.0472309	0.962329	0.981121	piRNA_cluster_flamenco
Cutoff	piRNA_cluster_flamenco.159	5.08581	0.0948756	2.21538	0.0428258	0.96584	NA	piRNA_cluster_flamenco
Cutoff	piRNA_cluster_80F.46	27.8213	-0.0445115	1.06324	-0.0418642	0.966607	0.981121	piRNA_cluster_80F
Cutoff	piRNA_cluster_20A.14	7.17661	0.0636763	1.86081	0.0342196	0.972702	0.98414	piRNA_cluster_20A
Cutoff	piRNA_cluster_20A.58	6.99708	0.0576595	1.8702	0.0308307	0.975405	0.98414	piRNA_cluster_20A
Cutoff	piRNA_cluster_42AB.30	32.7074	-0.0284248	1.08308	-0.0262446	0.979062	0.984382	piRNA_cluster_42AB
Cutoff	piRNA_cluster_20A.13	9.08788	0.0394039	1.69646	0.0232271	0.981469	0.984382	piRNA_cluster_20A
Cutoff	piRNA_cluster_flamenco.153	5.34501	0.0363532	2.09166	0.0173801	0.986133	NA	piRNA_cluster_flamenco
Cutoff	piRNA_cluster_42AB.32	17.2546	-0.0173755	1.28614	-0.0135098	0.989221	0.989221	piRNA_cluster_42AB
Deadlock	piRNA_cluster_42AB.47	557.557	6.7039	0.643107	10.4242	1.92225e-25	5.19007e-23	piRNA_cluster_42AB
Deadlock	piRNA_cluster_42AB.46	512.443	6.84408	0.689868	9.92086	3.3783e-23	4.56071e-21	piRNA_cluster_42AB
Deadlock	piRNA_cluster_42AB.251	501.874	5.2233	0.63343	8.24605	1.63711e-16	1.4734e-14	piRNA_cluster_42AB
Deadlock	piRNA_cluster_42AB.250	187.357	5.06885	0.73884	6.86055	6.85939e-12	4.63009e-10	piRNA_cluster_42AB
Deadlock	piRNA_cluster_80F.4	157.885	4.2319	0.703428	6.01611	1.78656e-09	9.64744e-08	piRNA_cluster_80F
Deadlock	piRNA_cluster_42AB.45	69.9866	4.56693	0.839997	5.43684	5.42325e-08	2.44046e-06	piRNA_cluster_42AB
Deadlock	piRNA_cluster_38C2.34	44.1266	5.71453	1.06872	5.34706	8.93967e-08	3.44816e-06	piRNA_cluster_38C2
Deadlock	piRNA_cluster_42AB.252	72.3399	3.72452	0.798481	4.66451	3.0935e-06	0.000104406	piRNA_cluster_42AB
Deadlock	piRNA_cluster_42AB.74	104.697	-9.31169	2.15879	-4.31339	1.60772e-05	0.000482316	piRNA_cluster_42AB
Deadlock	piRNA_cluster_42AB.89	69.2598	-5.2594	1.29353	-4.06592	4.78426e-05	0.00119996	piRNA_cluster_42AB
Deadlock	piRNA_cluster_42AB.73	74.5981	-8.8204	2.17204	-4.06088	4.88872e-05	0.00119996	piRNA_cluster_42AB
Deadlock	piRNA_cluster_42AB.71	57.9111	-8.45573	2.18918	-3.86251	0.000112229	0.00252515	piRNA_cluster_42AB
Deadlock	piRNA_cluster_42AB.88	58.1692	-5.00306	1.30282	-3.84017	0.00012295	0.00255358	piRNA_cluster_42AB
Deadlock	piRNA_cluster_80F.5	105.367	3.1374	0.820969	3.82158	0.000132601	0.00255731	piRNA_cluster_80F
Deadlock	piRNA_cluster_42AB.87	49.8135	-8.24687	2.21688	-3.72003	0.000199197	0.00358555	piRNA_cluster_42AB
Deadlock	piRNA_cluster_42AB.259	69.0809	3.10335	0.838878	3.6994	0.000216111	0.00364688	piRNA_cluster_42AB
Deadlock	piRNA_cluster_42AB.75	46.3936	-8.13985	2.21171	-3.68034	0.000232927	0.00369942	piRNA_cluster_42AB
Deadlock	piRNA_cluster_42AB.90	43.2196	-8.04149	2.22632	-3.61201	0.000303831	0.00455746	piRNA_cluster_42AB
Deadlock	piRNA_cluster_42AB.52	49.4774	-4.77243	1.37083	-3.48142	0.000498767	0.00696865	piRNA_cluster_42AB
Deadlock	piRNA_cluster_42AB.86	36.4238	-7.79595	2.24629	-3.4706	0.000519299	0.00696865	piRNA_cluster_42AB
Deadlock	piRNA_cluster_42AB.220	38.1726	-7.86974	2.27509	-3.45909	0.000542006	0.00696865	piRNA_cluster_42AB
Deadlock	piRNA_cluster_42AB.76	34.6183	-7.72248	2.25145	-3.42999	0.000603593	0.00740774	piRNA_cluster_42AB
Deadlock	piRNA_cluster_42AB.77	32.8348	-7.65268	2.2849	-3.34925	0.000810321	0.00951246	piRNA_cluster_42AB
Deadlock	piRNA_cluster_80F.20	30.2788	-7.52194	2.25765	-3.33175	0.000863013	0.0097089	piRNA_cluster_80F
Deadlock	piRNA_cluster_38C1.7	41.7289	3.05027	0.920317	3.31436	0.000918522	0.00992003	piRNA_cluster_38C1
Deadlock	piRNA_cluster_42AB.208	39.4975	-4.43519	1.35801	-3.26594	0.001091	0.0113296	piRNA_cluster_42AB
Deadlock	piRNA_cluster_42AB.78	28.125	-7.42807	2.29369	-3.23848	0.00120169	0.0120169	piRNA_cluster_42AB
Deadlock	piRNA_cluster_42AB.50	24.5031	-7.22391	2.29902	-3.14217	0.00167698	0.0161709	piRNA_cluster_42AB
Deadlock	piRNA_cluster_80F.23	23.8751	-7.18731	2.305	-3.11813	0.00182002	0.016945	piRNA_cluster_80F
Deadlock	piRNA_cluster_42AB.192	22.7086	-7.12001	2.32666	-3.06019	0.00221199	0.0199079	piRNA_cluster_42AB
Deadlock	piRNA_cluster_42AB.51	20.8922	-6.99256	2.32544	-3.00698	0.00263854	0.0229809	piRNA_cluster_42AB
Deadlock	piRNA_cluster_42AB.59	20.298	-6.94566	2.32587	-2.98626	0.00282412	0.0238285	piRNA_cluster_42AB
Deadlock	piRNA_cluster_20A.25	264.55	1.84639	0.622238	2.96733	0.00300397	0.0243532	piRNA_cluster_20A
Deadlock	piRNA_cluster_42AB.60	20.0174	-6.93543	2.34228	-2.96097	0.0030667	0.0243532	piRNA_cluster_42AB
Deadlock	piRNA_cluster_80F.21	19.2101	-6.8684	2.33896	-2.93652	0.00331921	0.0251143	piRNA_cluster_80F
Deadlock	piRNA_cluster_42AB.239	19.2778	-6.8594	2.33807	-2.93378	0.00334857	0.0251143	piRNA_cluster_42AB
Deadlock	piRNA_cluster_42AB.180	18.9862	-6.83892	2.34021	-2.92235	0.003474	0.0251291	piRNA_cluster_42AB
Deadlock	piRNA_cluster_42AB.219	35.8071	-4.30132	1.47468	-2.91678	0.00353669	0.0251291	piRNA_cluster_42AB
Deadlock	piRNA_cluster_42AB.184	18.0327	-6.77446	2.35101	-2.88151	0.00395779	0.0271143	piRNA_cluster_42AB
Deadlock	piRNA_cluster_42AB.224	29.3593	-5.02043	1.74828	-2.87164	0.00408352	0.0271143	piRNA_cluster_42AB
Deadlock	piRNA_cluster_42AB.218	42.4928	-3.17693	1.10732	-2.86903	0.00411735	0.0271143	piRNA_cluster_42AB
Deadlock	piRNA_cluster_42AB.15	30.3925	-4.02623	1.40892	-2.85767	0.00426763	0.0274347	piRNA_cluster_42AB
Deadlock	piRNA_cluster_42AB.240	17.4605	-6.74114	2.37819	-2.83457	0.00458872	0.0286137	piRNA_cluster_42AB
Deadlock	piRNA_cluster_42AB.217	29.1235	-5.01505	1.77664	-2.82278	0.00476095	0.0286137	piRNA_cluster_42AB
Deadlock	piRNA_cluster_42AB.70	17.337	-6.73286	2.38564	-2.82224	0.00476895	0.0286137	piRNA_cluster_42AB
Deadlock	piRNA_cluster_42AB.227	16.9558	-6.69818	2.38303	-2.81078	0.00494212	0.0286301	piRNA_cluster_42AB
Deadlock	piRNA_cluster_42AB.69	16.6532	-6.66418	2.37321	-2.80808	0.00498376	0.0286301	piRNA_cluster_42AB
Deadlock	piRNA_cluster_42AB.194	32.0519	-3.51789	1.25851	-2.79529	0.00518535	0.0287412	piRNA_cluster_42AB
Deadlock	piRNA_cluster_42AB.56	17.0902	-6.71574	2.40416	-2.79338	0.00521599	0.0287412	piRNA_cluster_42AB
Deadlock	piRNA_cluster_42AB.58	15.5992	-6.56414	2.38564	-2.75152	0.00593195	0.0320325	piRNA_cluster_42AB
Deadlock	piRNA_cluster_42AB.221	15.431	-6.54797	2.38829	-2.7417	0.00611221	0.0323588	piRNA_cluster_42AB
Deadlock	piRNA_cluster_flamenco.129	41.3556	2.47724	0.915743	2.70517	0.00682692	0.0354475	piRNA_cluster_flamenco
Deadlock	piRNA_cluster_42AB.216	27.9353	-3.93087	1.46371	-2.68556	0.00724094	0.0368878	piRNA_cluster_42AB
Deadlock	piRNA_cluster_38C1.17	24.8735	-4.78005	1.78628	-2.67598	0.00745112	0.0372556	piRNA_cluster_38C1
Deadlock	piRNA_cluster_42AB.68	13.8385	-6.3921	2.41864	-2.64285	0.00822112	0.0395901	piRNA_cluster_42AB
Deadlock	piRNA_cluster_42AB.193	13.7151	-6.38224	2.42302	-2.634	0.00843854	0.0395901	piRNA_cluster_42AB
Deadlock	piRNA_cluster_42AB.49	13.5917	-6.37226	2.42846	-2.624	0.00869042	0.0395901	piRNA_cluster_42AB
Deadlock	piRNA_cluster_42AB.238	13.5469	-6.36389	2.42622	-2.62297	0.00871681	0.0395901	piRNA_cluster_42AB
Deadlock	piRNA_cluster_80F.35	13.5807	-6.35679	2.42408	-2.62236	0.00873239	0.0395901	piRNA_cluster_80F
Deadlock	piRNA_cluster_42AB.185	26.2084	-3.83369	1.46335	-2.61981	0.0087978	0.0395901	piRNA_cluster_42AB
Deadlock	piRNA_cluster_42AB.183	25.8272	-3.81016	1.4589	-2.61167	0.00901008	0.039737	piRNA_cluster_42AB
Deadlock	piRNA_cluster_42AB.223	22.9675	-4.65119	1.78388	-2.60734	0.00912479	0.039737	piRNA_cluster_42AB
Deadlock	piRNA_cluster_42AB.225	12.9637	-6.30568	2.4445	-2.57954	0.00989318	0.0414964	piRNA_cluster_42AB
Deadlock	piRNA_cluster_20A.26	247.352	1.70258	0.660893	2.57618	0.00998988	0.0414964	piRNA_cluster_20A
Deadlock	piRNA_cluster_42AB.55	12.6163	-6.24993	2.44658	-2.55456	0.0106324	0.043496	piRNA_cluster_42AB
Deadlock	piRNA_cluster_42AB.67	12.4591	-6.24687	2.45491	-2.54464	0.0109389	0.0440822	piRNA_cluster_42AB
Deadlock	piRNA_cluster_42AB.246	12.3357	-6.23586	2.46257	-2.53225	0.0113332	0.0445216	piRNA_cluster_42AB
Deadlock	piRNA_cluster_38C2.37	12.2461	-6.21736	2.4566	-2.53088	0.0113777	0.0445216	piRNA_cluster_38C2
Deadlock	piRNA_cluster_42AB.48	12.1784	-6.23002	2.50323	-2.48879	0.0128177	0.0493961	piRNA_cluster_42AB
Deadlock	piRNA_cluster_42AB.214	21.2288	-4.55168	1.83595	-2.47919	0.0131681	0.0493961	piRNA_cluster_42AB
Deadlock	piRNA_cluster_80F.37	11.8539	-6.14794	2.47993	-2.47908	0.0131723	0.0493961	piRNA_cluster_80F
Deadlock	piRNA_cluster_80F.34	11.4498	-6.12136	2.4794	-2.46889	0.0135532	0.0501282	piRNA_cluster_80F
Deadlock	piRNA_cluster_38C2.25	11.3712	-6.11946	2.49081	-2.45682	0.0140173	0.0511442	piRNA_cluster_38C2
Deadlock	piRNA_cluster_38C1.9	11.192	-6.07842	2.4855	-2.44555	0.014463	0.0520668	piRNA_cluster_38C1
Deadlock	piRNA_cluster_80F.14	22.4411	-3.57858	1.47103	-2.43269	0.0149869	0.053243	piRNA_cluster_80F
Deadlock	piRNA_cluster_80F.32	19.1546	-4.38652	1.82932	-2.3979	0.0164894	0.05782	piRNA_cluster_80F
Deadlock	piRNA_cluster_80F.30	10.8447	-6.01322	2.52469	-2.38177	0.0172298	0.0596417	piRNA_cluster_80F
Deadlock	piRNA_cluster_42AB.187	22.1824	-3.58691	1.51656	-2.36516	0.0180224	0.0614547	piRNA_cluster_42AB
Deadlock	piRNA_cluster_42AB.72	21.2408	-3.50885	1.48886	-2.35673	0.0184364	0.0614547	piRNA_cluster_42AB
Deadlock	piRNA_cluster_80F.11	35.8223	-2.60473	1.11733	-2.33121	0.0197421	0.0634735	piRNA_cluster_80F
Deadlock	piRNA_cluster_42AB.222	18.0667	-4.30272	1.84751	-2.32893	0.0198627	0.0634735	piRNA_cluster_42AB
Deadlock	piRNA_cluster_42AB.66	9.81258	-5.89591	2.53405	-2.32668	0.0199824	0.0634735	piRNA_cluster_42AB
Deadlock	piRNA_cluster_42AB.226	9.65536	-5.89134	2.56721	-2.29485	0.0217419	0.0676053	piRNA_cluster_42AB
Deadlock	piRNA_cluster_42AB.179	9.47617	-5.84374	2.54728	-2.29411	0.0217839	0.0676053	piRNA_cluster_42AB
Deadlock	piRNA_cluster_flamenco.29	25.3974	2.59073	1.14571	2.26125	0.023744	0.072851	piRNA_cluster_flamenco
Deadlock	piRNA_cluster_80F.33	9.01635	-5.77493	2.56855	-2.24832	0.0245556	0.0744944	piRNA_cluster_80F
Deadlock	piRNA_cluster_42AB.215	23.0803	-3.02391	1.35155	-2.23737	0.0252624	0.0750481	piRNA_cluster_42AB
Deadlock	piRNA_cluster_42AB.191	27.5325	-2.86076	1.2789	-2.23688	0.025294	0.0750481	piRNA_cluster_42AB
Deadlock	piRNA_cluster_38C2.38	9.28513	-5.84547	2.6375	-2.21629	0.0266716	0.0782754	piRNA_cluster_38C2
Deadlock	piRNA_cluster_38C1.19	8.55653	-5.70267	2.59276	-2.19946	0.0278449	NA	piRNA_cluster_38C1
Deadlock	piRNA_cluster_38C2.42	8.73572	-5.75366	2.63282	-2.18536	0.0288622	NA	piRNA_cluster_38C2
Deadlock	piRNA_cluster_38C1.2	8.43312	-5.68695	2.60437	-2.18362	0.02899	NA	piRNA_cluster_38C1
Deadlock	piRNA_cluster_20A.32	103.201	1.57737	0.722528	2.18313	0.0290262	0.0842695	piRNA_cluster_20A
Deadlock	piRNA_cluster_42AB.249	8.38833	-5.67309	2.60085	-2.18124	0.0291654	NA	piRNA_cluster_42AB
Deadlock	piRNA_cluster_80F.25	9.28601	-5.77582	2.66927	-2.16382	0.0304778	0.0860713	piRNA_cluster_80F
Deadlock	piRNA_cluster_38C2.46	8.22012	-5.64288	2.60928	-2.16262	0.0305706	NA	piRNA_cluster_38C2
Deadlock	piRNA_cluster_42AB.242	8.09671	-5.62658	2.62059	-2.14706	0.0317881	NA	piRNA_cluster_42AB
Deadlock	piRNA_cluster_42AB.176	8.14151	-5.64068	2.62722	-2.14701	0.0317924	NA	piRNA_cluster_42AB
Deadlock	piRNA_cluster_42AB.188	18.3475	-3.28865	1.53447	-2.14318	0.0320984	0.088866	piRNA_cluster_42AB
Deadlock	piRNA_cluster_42AB.9	15.3306	-4.04774	1.89037	-2.14124	0.0322551	0.088866	piRNA_cluster_42AB
Deadlock	piRNA_cluster_80F.29	8.08573	-5.59879	2.62278	-2.13468	0.0327874	NA	piRNA_cluster_80F
Deadlock	piRNA_cluster_38C2.73	7.88371	-5.58047	2.62742	-2.12394	0.0336754	NA	piRNA_cluster_38C2
Deadlock	piRNA_cluster_38C2.44	7.91752	-5.56693	2.63433	-2.11322	0.0345817	NA	piRNA_cluster_38C2
Deadlock	piRNA_cluster_flamenco.116	41.7786	1.91163	0.90815	2.10497	0.0352939	0.0952934	piRNA_cluster_flamenco
Deadlock	piRNA_cluster_38C2.74	7.7155	-5.5482	2.63718	-2.10384	0.0353923	NA	piRNA_cluster_38C2
Deadlock	piRNA_cluster_38C2.23	7.67071	-5.53258	2.64006	-2.09563	0.0361154	NA	piRNA_cluster_38C2
Deadlock	piRNA_cluster_38C2.47	7.59209	-5.53091	2.64799	-2.08872	0.036733	NA	piRNA_cluster_38C2
Deadlock	piRNA_cluster_42AB.174	14.3214	-3.94204	1.91428	-2.05927	0.039468	0.105509	piRNA_cluster_42AB
Deadlock	piRNA_cluster_80F.36	7.30048	-5.47949	2.67232	-2.05046	0.0403193	NA	piRNA_cluster_80F
Deadlock	piRNA_cluster_38C2.22	13.5361	-3.87402	1.93529	-2.00178	0.0453087	0.117628	piRNA_cluster_38C2
Deadlock	piRNA_cluster_80F.24	13.4017	-3.84654	1.93468	-1.98821	0.0467889	0.120314	piRNA_cluster_80F
Deadlock	piRNA_cluster_42AB.57	6.88545	-5.4064	2.7254	-1.98371	0.0472886	NA	piRNA_cluster_42AB
Deadlock	piRNA_cluster_42AB.206	19.6824	-2.77974	1.40209	-1.98257	0.0474155	0.120775	piRNA_cluster_42AB
Deadlock	piRNA_cluster_42AB.237	6.75106	-5.35559	2.70406	-1.98057	0.0476394	NA	piRNA_cluster_42AB
Deadlock	piRNA_cluster_42AB.195	13.6367	-3.90457	1.99189	-1.96024	0.0499681	0.12492	piRNA_cluster_42AB
Deadlock	piRNA_cluster_20A.16	6.66147	-5.31944	2.7176	-1.9574	0.0503002	NA	piRNA_cluster_20A
Deadlock	piRNA_cluster_38C1.15	19.1668	-2.72664	1.39585	-1.95339	0.0507735	0.125769	piRNA_cluster_38C1
Deadlock	piRNA_cluster_42AB.213	6.54904	-5.33297	2.7481	-1.9406	0.0523069	NA	piRNA_cluster_42AB
Deadlock	piRNA_cluster_42AB.245	13.0425	-3.83177	1.97482	-1.94031	0.0523415	0.128475	piRNA_cluster_42AB
Deadlock	piRNA_cluster_38C2.24	6.16784	-5.23705	2.76249	-1.89577	0.0579906	NA	piRNA_cluster_38C2
Deadlock	piRNA_cluster_38C2.75	6.07824	-5.19795	2.76156	-1.88225	0.0598018	NA	piRNA_cluster_38C2
Deadlock	piRNA_cluster_80F.22	12.0671	-3.70091	1.97504	-1.87384	0.0609528	0.147862	piRNA_cluster_80F
Deadlock	piRNA_cluster_42AB.186	18.6841	-2.70689	1.44671	-1.87107	0.0613353	0.147862	piRNA_cluster_42AB
Deadlock	piRNA_cluster_38C1.18	18.3596	-2.6481	1.41862	-1.86667	0.0619472	0.148015	piRNA_cluster_38C1
Deadlock	piRNA_cluster_80F.15	11.9885	-3.69955	1.98857	-1.8604	0.0628285	0.148804	piRNA_cluster_80F
Deadlock	piRNA_cluster_38C2.19	5.78663	-5.13323	2.79058	-1.83948	0.065844	NA	piRNA_cluster_38C2
Deadlock	piRNA_cluster_flamenco.30	7.1274	3.66846	2.00306	1.83143	0.0670367	NA	piRNA_cluster_flamenco
Deadlock	piRNA_cluster_42AB.182	11.6521	-3.65582	1.99731	-1.83037	0.0671945	0.157264	piRNA_cluster_42AB
Deadlock	piRNA_cluster_42AB.149	5.96581	-5.20968	2.84956	-1.82824	0.0675139	NA	piRNA_cluster_42AB
Deadlock	piRNA_cluster_20A.28	101.828	1.35981	0.743921	1.82789	0.0675654	0.157264	piRNA_cluster_20A
Deadlock	piRNA_cluster_38C1.6	5.61842	-5.089	2.80801	-1.81232	0.0699372	NA	piRNA_cluster_38C1
Deadlock	piRNA_cluster_20A.23	1217.57	1.15811	0.648954	1.78458	0.0743292	0.171529	piRNA_cluster_20A
Deadlock	piRNA_cluster_42AB.65	5.6294	-5.12556	2.87877	-1.78047	0.0749994	NA	piRNA_cluster_42AB
Deadlock	piRNA_cluster_38C2.18	5.32681	-5.01906	2.84404	-1.76476	0.0776035	NA	piRNA_cluster_38C2
Deadlock	piRNA_cluster_38C1.23	5.28201	-4.99621	2.84648	-1.75522	0.0792209	NA	piRNA_cluster_38C1
Deadlock	piRNA_cluster_38C2.92	5.2034	-4.99407	2.86846	-1.74103	0.081678	NA	piRNA_cluster_38C2
Deadlock	piRNA_cluster_42AB.207	30.1476	-1.89614	1.09465	-1.73219	0.08324	0.188864	piRNA_cluster_42AB
Deadlock	piRNA_cluster_42AB.197	5.1138	-4.94745	2.86778	-1.72519	0.0844941	NA	piRNA_cluster_42AB
Deadlock	piRNA_cluster_38C1.29	5.31583	-4.97587	2.88585	-1.72423	0.0846659	NA	piRNA_cluster_38C1
Deadlock	piRNA_cluster_20A.53	191.893	-1.11669	0.650545	-1.71654	0.086063	0.192876	piRNA_cluster_20A
Deadlock	piRNA_cluster_42AB.241	13.5253	-2.82509	1.64776	-1.7145	0.0864372	0.192876	piRNA_cluster_42AB
Deadlock	piRNA_cluster_38C2.17	5.06901	-4.92332	2.88132	-1.70871	0.0875054	NA	piRNA_cluster_38C2
Deadlock	piRNA_cluster_80F.38	4.99039	-4.92159	2.88468	-1.70611	0.0879869	NA	piRNA_cluster_80F
Deadlock	piRNA_cluster_42AB.8	4.9456	-4.89698	2.89067	-1.69406	0.0902531	NA	piRNA_cluster_42AB
Deadlock	piRNA_cluster_38C2.20	4.9456	-4.89698	2.89067	-1.69406	0.0902531	NA	piRNA_cluster_38C2
Deadlock	piRNA_cluster_38C2.8	5.14762	-4.92676	2.91658	-1.68923	0.091176	NA	piRNA_cluster_38C2
Deadlock	piRNA_cluster_38C2.14	5.02421	-4.89925	2.90687	-1.6854	0.0919108	NA	piRNA_cluster_38C2
Deadlock	piRNA_cluster_42AB.150	5.16958	-5.00795	2.98457	-1.67795	0.0933572	NA	piRNA_cluster_42AB
Deadlock	piRNA_cluster_38C1.26	4.9008	-4.872	2.90699	-1.67596	0.0937457	NA	piRNA_cluster_38C1
Deadlock	piRNA_cluster_42AB.181	4.82219	-4.87023	2.9072	-1.67523	0.0938886	NA	piRNA_cluster_42AB
Deadlock	piRNA_cluster_flamenco.41	50.8304	1.41945	0.852512	1.66502	0.0959082	0.21053	piRNA_cluster_flamenco
Deadlock	piRNA_cluster_flamenco.135	19.9749	1.94646	1.19013	1.6355	0.101945	0.220555	piRNA_cluster_flamenco
Deadlock	piRNA_cluster_80F.28	9.72318	-3.38627	2.07596	-1.63118	0.102851	0.220555	piRNA_cluster_80F
Deadlock	piRNA_cluster_42AB.20	21.0631	-2.06026	1.26332	-1.63083	0.102926	0.220555	piRNA_cluster_42AB
Deadlock	piRNA_cluster_80F.10	28.376	-1.79025	1.10075	-1.62639	0.103866	0.220817	piRNA_cluster_80F
Deadlock	piRNA_cluster_38C2.45	4.57537	-4.81429	2.96623	-1.62304	0.104582	NA	piRNA_cluster_38C2
Deadlock	piRNA_cluster_38C1.22	4.53057	-4.78855	2.95576	-1.62007	0.105216	NA	piRNA_cluster_38C1
Deadlock	piRNA_cluster_38C2.91	4.53057	-4.78855	2.95576	-1.62007	0.105216	NA	piRNA_cluster_38C2
Deadlock	piRNA_cluster_42AB.17	20.8273	-2.0578	1.27045	-1.61973	0.105289	0.221921	piRNA_cluster_42AB
Deadlock	piRNA_cluster_42AB.175	4.48578	-4.76163	2.9575	-1.61002	0.107393	NA	piRNA_cluster_42AB
Deadlock	piRNA_cluster_42AB.10	4.93462	-4.85577	3.04088	-1.59683	0.110304	NA	piRNA_cluster_42AB
Deadlock	piRNA_cluster_flamenco.31	11.2674	2.36962	1.48467	1.59606	0.110476	0.229449	piRNA_cluster_flamenco
Deadlock	piRNA_cluster_38C2.96	4.44098	-4.73398	2.97095	-1.59342	0.111065	NA	piRNA_cluster_38C2
Deadlock	piRNA_cluster_38C2.84	4.40717	-4.75911	2.9903	-1.59151	0.111494	NA	piRNA_cluster_38C2
Deadlock	piRNA_cluster_flamenco.105	19.077	1.91481	1.20676	1.58674	0.112572	0.230262	piRNA_cluster_flamenco
Deadlock	piRNA_cluster_38C1.20	4.31757	-4.70407	2.9857	-1.57553	0.115134	NA	piRNA_cluster_38C1
Deadlock	piRNA_cluster_38C1.24	4.27278	-4.67528	3.0025	-1.55713	0.11944	NA	piRNA_cluster_38C1
Deadlock	piRNA_cluster_flamenco.133	10.4034	2.4079	1.55351	1.54998	0.121147	0.244103	piRNA_cluster_flamenco
Deadlock	piRNA_cluster_38C2.3	4.14937	-4.64411	3.0163	-1.53967	0.123641	NA	piRNA_cluster_38C2
Deadlock	piRNA_cluster_flamenco.27	20.6139	1.76039	1.15565	1.52328	0.127689	0.255377	piRNA_cluster_flamenco
Deadlock	piRNA_cluster_38C1.12	4.11555	-4.66962	3.06722	-1.52243	0.127902	NA	piRNA_cluster_38C1
Deadlock	piRNA_cluster_38C1.21	8.62435	-3.1856	2.11509	-1.50613	0.132034	NA	piRNA_cluster_38C1
Deadlock	piRNA_cluster_38C1.30	3.98116	-4.58153	3.04962	-1.50232	0.133013	NA	piRNA_cluster_38C1
Deadlock	piRNA_cluster_flamenco.3	38.9992	-1.6195	1.08313	-1.4952	0.134863	0.267742	piRNA_cluster_flamenco
Deadlock	piRNA_cluster_flamenco.120	20.2435	1.72234	1.15835	1.48689	0.137045	0.270089	piRNA_cluster_flamenco
Deadlock	piRNA_cluster_38C2.1	3.85775	-4.54834	3.07321	-1.47999	0.138875	NA	piRNA_cluster_38C2
Deadlock	piRNA_cluster_38C2.39	3.85775	-4.54834	3.07321	-1.47999	0.138875	NA	piRNA_cluster_38C2
Deadlock	piRNA_cluster_20A.22	2195.87	0.891463	0.609049	1.4637	0.143277	0.280325	piRNA_cluster_20A
Deadlock	piRNA_cluster_38C1.14	3.81295	-4.5161	3.08607	-1.46338	0.143363	NA	piRNA_cluster_38C1
Deadlock	piRNA_cluster_42AB.136	3.73434	-4.51407	3.10907	-1.45191	0.146528	NA	piRNA_cluster_42AB
Deadlock	piRNA_cluster_20A.24	445.098	0.8659	0.598829	1.44599	0.14818	0.287832	piRNA_cluster_20A
Deadlock	piRNA_cluster_38C2.2	3.76816	-4.48346	3.1178	-1.43802	0.150429	NA	piRNA_cluster_38C2
Deadlock	piRNA_cluster_38C1.1	3.64475	-4.44755	3.12614	-1.4227	0.154824	NA	piRNA_cluster_38C1
Deadlock	piRNA_cluster_80F.47	24.6195	-1.74811	1.23306	-1.4177	0.156278	0.301392	piRNA_cluster_80F
Deadlock	piRNA_cluster_38C2.13	3.61093	-4.47814	3.16195	-1.41626	0.1567	NA	piRNA_cluster_38C2
Deadlock	piRNA_cluster_42AB.19	18.955	-1.87488	1.33352	-1.40597	0.159734	0.305874	piRNA_cluster_42AB
Deadlock	piRNA_cluster_42AB.228	7.74951	-3.0383	2.17867	-1.39457	0.163146	NA	piRNA_cluster_42AB
Deadlock	piRNA_cluster_38C1.13	10.5872	-2.44054	1.75184	-1.39313	0.163581	0.311035	piRNA_cluster_38C1
Deadlock	piRNA_cluster_flamenco.134	8.22604	2.31571	1.6966	1.36491	0.172282	NA	piRNA_cluster_flamenco
Deadlock	piRNA_cluster_80F.43	1444.04	0.811982	0.59623	1.36186	0.173242	0.324923	piRNA_cluster_80F
Deadlock	piRNA_cluster_80F.44	2022.82	0.807405	0.592939	1.3617	0.173292	0.324923	piRNA_cluster_80F
Deadlock	piRNA_cluster_42AB.34	28.8262	1.41458	1.04386	1.35514	0.175372	0.325507	piRNA_cluster_42AB
Deadlock	piRNA_cluster_flamenco.106	32.7982	1.39788	1.03681	1.34825	0.177579	0.325507	piRNA_cluster_flamenco
Deadlock	piRNA_cluster_38C2.43	12.9313	-2.1254	1.5795	-1.34562	0.178426	0.325507	piRNA_cluster_38C2
Deadlock	piRNA_cluster_38C1.16	7.44691	-2.95015	2.19399	-1.34465	0.178739	NA	piRNA_cluster_38C1
Deadlock	piRNA_cluster_38C1.11	3.30834	-4.29988	3.21994	-1.33539	0.181748	NA	piRNA_cluster_38C1
Deadlock	piRNA_cluster_38C1.25	3.30834	-4.29988	3.21994	-1.33539	0.181748	NA	piRNA_cluster_38C1
Deadlock	piRNA_cluster_42AB.235	7.20009	-2.91324	2.20832	-1.31921	0.1871	NA	piRNA_cluster_42AB
Deadlock	piRNA_cluster_38C2.80	3.18493	-4.25947	3.23969	-1.31478	0.188585	NA	piRNA_cluster_38C2
Deadlock	piRNA_cluster_80F.49	38.6521	-1.34477	1.03261	-1.3023	0.192814	0.347065	piRNA_cluster_80F
Deadlock	piRNA_cluster_38C2.95	3.10632	-4.25686	3.28469	-1.29597	0.194986	NA	piRNA_cluster_38C2
Deadlock	piRNA_cluster_flamenco.114	7.36199	2.36334	1.82484	1.2951	0.195287	NA	piRNA_cluster_flamenco
Deadlock	piRNA_cluster_20A.15	3.06152	-4.21804	3.27666	-1.2873	0.19799	NA	piRNA_cluster_20A
Deadlock	piRNA_cluster_20A.57	39.5184	1.23391	0.959956	1.28538	0.198658	0.352952	piRNA_cluster_20A
Deadlock	piRNA_cluster_38C2.6	3.01672	-4.17715	3.29294	-1.26852	0.204613	NA	piRNA_cluster_38C2
Deadlock	piRNA_cluster_42AB.141	2.93811	-4.17475	3.3341	-1.25214	0.21052	NA	piRNA_cluster_42AB
Deadlock	piRNA_cluster_42AB.236	2.93811	-4.17475	3.3341	-1.25214	0.21052	NA	piRNA_cluster_42AB
Deadlock	piRNA_cluster_flamenco.103	24.7416	1.34842	1.07727	1.2517	0.21068	0.368894	piRNA_cluster_flamenco
Deadlock	piRNA_cluster_42AB.4	16.6779	-1.6983	1.36098	-1.24785	0.212085	0.368894	piRNA_cluster_42AB
Deadlock	piRNA_cluster_80F.50	1220.89	0.700322	0.562516	1.24498	0.213138	0.368894	piRNA_cluster_80F
Deadlock	piRNA_cluster_42AB.247	2.89331	-4.13334	3.32991	-1.24128	0.214503	NA	piRNA_cluster_42AB
Deadlock	piRNA_cluster_38C2.15	2.89331	-4.13334	3.32991	-1.24128	0.214503	NA	piRNA_cluster_38C2
Deadlock	piRNA_cluster_flamenco.40	58.4005	1.00547	0.815026	1.23366	0.217329	0.371386	piRNA_cluster_flamenco
Deadlock	piRNA_cluster_42AB.177	6.65068	-2.77537	2.25683	-1.22977	0.218784	NA	piRNA_cluster_42AB
Deadlock	piRNA_cluster_42AB.258	10.3015	1.88621	1.53616	1.22788	0.219494	0.372725	piRNA_cluster_42AB
Deadlock	piRNA_cluster_flamenco.132	10.5484	1.84987	1.51687	1.21953	0.222645	0.375713	piRNA_cluster_flamenco
Deadlock	piRNA_cluster_38C1.3	2.7699	-4.08763	3.38888	-1.20619	0.227744	NA	piRNA_cluster_38C1
Deadlock	piRNA_cluster_flamenco.36	26.4357	1.27282	1.05818	1.20283	0.22904	0.384105	piRNA_cluster_flamenco
Deadlock	piRNA_cluster_flamenco.92	2.72511	-4.04332	3.38929	-1.19297	0.232882	NA	piRNA_cluster_flamenco
Deadlock	piRNA_cluster_42AB.107	2.72511	-4.04332	3.38929	-1.19297	0.232882	NA	piRNA_cluster_42AB
Deadlock	piRNA_cluster_flamenco.9	38.4965	1.07878	0.918929	1.17396	0.240412	0.400687	piRNA_cluster_flamenco
Deadlock	piRNA_cluster_flamenco.39	39.3715	1.06931	0.91493	1.16873	0.242511	0.401705	piRNA_cluster_flamenco
Deadlock	piRNA_cluster_42AB.142	2.6465	-4.03861	3.48639	-1.15839	0.246704	NA	piRNA_cluster_42AB
Deadlock	piRNA_cluster_20A.11	8.93899	-2.1383	1.8583	-1.15067	0.249867	0.408873	piRNA_cluster_20A
Deadlock	piRNA_cluster_flamenco.2	19.8867	-1.64027	1.43885	-1.13999	0.254289	0.413602	piRNA_cluster_flamenco
Deadlock	piRNA_cluster_42AB.44	14.2395	1.53971	1.3564	1.13515	0.256314	0.413925	piRNA_cluster_42AB
Deadlock	piRNA_cluster_20A.60	6.02265	-2.62322	2.31449	-1.13339	0.257051	NA	piRNA_cluster_20A
Deadlock	piRNA_cluster_42AB.190	17.6205	-1.47083	1.2991	-1.13219	0.257553	0.413925	piRNA_cluster_42AB
Deadlock	piRNA_cluster_42AB.198	2.43349	-3.89562	3.5185	-1.10718	0.268215	NA	piRNA_cluster_42AB
Deadlock	piRNA_cluster_42AB.260	57.5591	0.974907	0.881196	1.10634	0.268577	0.429088	piRNA_cluster_42AB
Deadlock	piRNA_cluster_42AB.244	5.77583	-2.57754	2.34125	-1.10093	0.270929	NA	piRNA_cluster_42AB
Deadlock	piRNA_cluster_flamenco.176	21.1768	-1.48846	1.35401	-1.0993	0.271637	0.431424	piRNA_cluster_flamenco
Deadlock	piRNA_cluster_20A.21	3637.82	0.616537	0.563765	1.09361	0.274128	0.432833	piRNA_cluster_20A
Deadlock	piRNA_cluster_38C2.85	5.69722	-2.57689	2.38239	-1.08164	0.279411	NA	piRNA_cluster_38C2
Deadlock	piRNA_cluster_42AB.42	23.8546	1.22399	1.15098	1.06344	0.287584	0.449497	piRNA_cluster_42AB
Deadlock	piRNA_cluster_flamenco.102	20.4998	1.24618	1.17289	1.06249	0.288011	0.449497	piRNA_cluster_flamenco
Deadlock	piRNA_cluster_38C2.12	2.31008	-3.84039	3.62295	-1.06002	0.289137	NA	piRNA_cluster_38C2
Deadlock	piRNA_cluster_flamenco.24	8.61805	1.71875	1.6488	1.04243	0.297214	NA	piRNA_cluster_flamenco
Deadlock	piRNA_cluster_42AB.36	32.224	1.00727	0.974936	1.03316	0.301527	0.467886	piRNA_cluster_42AB
Deadlock	piRNA_cluster_38C1.5	5.47324	-2.45237	2.4036	-1.02029	0.307592	NA	piRNA_cluster_38C1
Deadlock	piRNA_cluster_flamenco.25	84.3718	0.76557	0.758388	1.00947	0.312749	0.479786	piRNA_cluster_flamenco
Deadlock	piRNA_cluster_42AB.144	2.14188	-3.7299	3.7051	-1.00669	0.314083	NA	piRNA_cluster_42AB
Deadlock	piRNA_cluster_42AB.147	2.14188	-3.7299	3.7051	-1.00669	0.314083	NA	piRNA_cluster_42AB
Deadlock	piRNA_cluster_42AB.6	9.98222	-1.67601	1.67707	-0.999368	0.317617	0.4845	piRNA_cluster_42AB
Deadlock	piRNA_cluster_42AB.189	5.2374	-2.45274	2.4648	-0.995109	0.319683	NA	piRNA_cluster_42AB
Deadlock	piRNA_cluster_flamenco.136	8.98827	1.65154	1.66815	0.990044	0.322153	0.488659	piRNA_cluster_flamenco
Deadlock	piRNA_cluster_flamenco.119	9.15648	1.57566	1.64011	0.960702	0.336702	0.504061	piRNA_cluster_flamenco
Deadlock	piRNA_cluster_80F.13	45.6642	0.834953	0.872159	0.957341	0.338395	0.504061	piRNA_cluster_80F
Deadlock	piRNA_cluster_flamenco.115	8.83105	1.58992	1.66551	0.954611	0.339775	0.504061	piRNA_cluster_flamenco
Deadlock	piRNA_cluster_80F.9	59.113	-0.768832	0.841135	-0.914041	0.360695	0.524645	piRNA_cluster_80F
Deadlock	piRNA_cluster_80F.31	9.43281	-1.56841	1.71851	-0.912659	0.361422	0.524645	piRNA_cluster_80F
Deadlock	piRNA_cluster_flamenco.131	48.3791	0.869782	0.968353	0.898207	0.369075	0.53289	piRNA_cluster_flamenco
Deadlock	piRNA_cluster_flamenco.8	99.7626	0.636477	0.717579	0.886979	0.37509	0.538694	piRNA_cluster_flamenco
Deadlock	piRNA_cluster_80F.7	29.8927	-0.910357	1.03309	-0.881197	0.378211	0.540302	piRNA_cluster_80F
Deadlock	piRNA_cluster_80F.26	4.92382	-2.26392	2.59726	-0.871655	0.383396	NA	piRNA_cluster_80F
Deadlock	piRNA_cluster_42AB.37	61.2803	0.685148	0.808532	0.847398	0.396774	0.560884	piRNA_cluster_42AB
Deadlock	piRNA_cluster_42AB.140	1.85026	-3.53319	4.19972	-0.841293	0.400184	NA	piRNA_cluster_42AB
Deadlock	piRNA_cluster_38C2.71	1.85026	-3.53319	4.19972	-0.841293	0.400184	NA	piRNA_cluster_38C2
Deadlock	piRNA_cluster_flamenco.101	5.8575	1.6395	1.95336	0.839324	0.401288	NA	piRNA_cluster_flamenco
Deadlock	piRNA_cluster_80F.41	20.156	-1.01402	1.22963	-0.824658	0.409566	0.572968	piRNA_cluster_80F
Deadlock	piRNA_cluster_42AB.23	20.2904	-1.03405	1.2666	-0.816399	0.414272	0.575707	piRNA_cluster_42AB
Deadlock	piRNA_cluster_42AB.109	14.8891	1.0618	1.30619	0.812897	0.416277	0.575707	piRNA_cluster_42AB
Deadlock	piRNA_cluster_80F.39	12.5175	-1.19493	1.47516	-0.810033	0.417921	0.575707	piRNA_cluster_80F
Deadlock	piRNA_cluster_42AB.53	9.38046	1.35619	1.70763	0.794195	0.427082	0.585341	piRNA_cluster_42AB
Deadlock	piRNA_cluster_flamenco.38	38.7525	0.739578	0.939621	0.787102	0.431222	0.585696	piRNA_cluster_flamenco
Deadlock	piRNA_cluster_38C2.4	4.21719	-2.03529	2.58813	-0.786394	0.431637	NA	piRNA_cluster_38C2
Deadlock	piRNA_cluster_80F.3	203.804	-0.548497	0.697548	-0.786321	0.431679	0.585696	piRNA_cluster_80F
Deadlock	piRNA_cluster_42AB.38	44.1259	0.688469	0.887436	0.775795	0.43787	0.591124	piRNA_cluster_42AB
Deadlock	piRNA_cluster_20A.59	6.30347	-1.57571	2.04943	-0.76885	0.441982	NA	piRNA_cluster_20A
Deadlock	piRNA_cluster_80F.27	6.22486	-1.57811	2.05662	-0.767328	0.442886	NA	piRNA_cluster_80F
Deadlock	piRNA_cluster_38C2.76	8.34496	-1.36408	1.78291	-0.765085	0.444221	NA	piRNA_cluster_38C2
Deadlock	piRNA_cluster_flamenco.107	14.1485	1.02428	1.34051	0.764092	0.444813	0.597509	piRNA_cluster_flamenco
Deadlock	piRNA_cluster_80F.8	142.862	-0.533359	0.717065	-0.743808	0.456993	0.610832	piRNA_cluster_80F
Deadlock	piRNA_cluster_38C2.16	3.84696	-1.93337	2.63879	-0.732674	0.463757	NA	piRNA_cluster_38C2
Deadlock	piRNA_cluster_42AB.16	29.3883	-0.760518	1.04517	-0.727652	0.466827	0.619946	piRNA_cluster_42AB
Deadlock	piRNA_cluster_80F.40	20.7733	-0.877545	1.21067	-0.724843	0.468549	0.619946	piRNA_cluster_80F
Deadlock	piRNA_cluster_42AB.35	29.496	0.73437	1.01806	0.721341	0.4707	0.619946	piRNA_cluster_42AB
Deadlock	piRNA_cluster_flamenco.130	3.80216	-1.8934	2.64332	-0.716294	0.47381	NA	piRNA_cluster_flamenco
Deadlock	piRNA_cluster_42AB.205	15.3445	-0.958079	1.3396	-0.715199	0.474486	0.621329	piRNA_cluster_42AB
Deadlock	piRNA_cluster_42AB.2	311.978	0.435427	0.612549	0.710845	0.47718	0.621329	piRNA_cluster_42AB
Deadlock	piRNA_cluster_flamenco.128	3.54598	1.74453	2.45521	0.710542	0.477368	NA	piRNA_cluster_flamenco
Deadlock	piRNA_cluster_20A.19	272.732	0.459831	0.649048	0.70847	0.478654	0.621329	piRNA_cluster_20A
Deadlock	piRNA_cluster_20A.9	6.16908	-1.50369	2.17407	-0.691645	0.48916	NA	piRNA_cluster_20A
Deadlock	piRNA_cluster_20A.20	2193.01	0.381065	0.552053	0.690269	0.490025	0.633047	piRNA_cluster_20A
Deadlock	piRNA_cluster_flamenco.113	7.64119	1.22916	1.78094	0.690173	0.490085	NA	piRNA_cluster_flamenco
Deadlock	piRNA_cluster_20A.13	5.92226	-1.45033	2.12201	-0.683469	0.494311	NA	piRNA_cluster_20A
Deadlock	piRNA_cluster_42AB.178	7.84035	-1.24923	1.82821	-0.683311	0.49441	NA	piRNA_cluster_42AB
Deadlock	piRNA_cluster_flamenco.7	106.122	0.484112	0.717116	0.675082	0.499624	0.642374	piRNA_cluster_flamenco
Deadlock	piRNA_cluster_42AB.31	5.57668	1.33897	1.99648	0.670665	0.502434	NA	piRNA_cluster_42AB
Deadlock	piRNA_cluster_38C2.94	23.3253	0.753469	1.12743	0.668308	0.503937	0.644848	piRNA_cluster_38C2
Deadlock	piRNA_cluster_80F.1	6.53032	1.24676	1.87576	0.66467	0.506262	NA	piRNA_cluster_80F
Deadlock	piRNA_cluster_80F.46	19.8765	-0.775715	1.1984	-0.647292	0.517443	0.659007	piRNA_cluster_80F
Deadlock	piRNA_cluster_42AB.110	28.8898	0.685436	1.06747	0.642111	0.520801	0.659088	piRNA_cluster_42AB
Deadlock	piRNA_cluster_80F.45	33.7977	-0.650796	1.02476	-0.635069	0.525384	0.659088	piRNA_cluster_80F
Deadlock	piRNA_cluster_42AB.5	11.0147	-0.983835	1.55626	-0.632178	0.527271	0.659088	piRNA_cluster_42AB
Deadlock	piRNA_cluster_42AB.21	11.0147	-0.983835	1.55626	-0.632178	0.527271	0.659088	piRNA_cluster_42AB
Deadlock	piRNA_cluster_flamenco.97	5.32986	1.42378	2.27201	0.626661	0.530882	NA	piRNA_cluster_flamenco
Deadlock	piRNA_cluster_42AB.32	17.48	0.763312	1.23519	0.61797	0.536595	0.667653	piRNA_cluster_42AB
Deadlock	piRNA_cluster_42AB.30	31.6381	0.621061	1.05536	0.588484	0.556208	0.685735	piRNA_cluster_42AB
Deadlock	piRNA_cluster_flamenco.118	8.19061	0.973828	1.67811	0.580311	0.561705	NA	piRNA_cluster_flamenco
Deadlock	piRNA_cluster_flamenco.154	11.5114	0.805836	1.45261	0.554751	0.579065	0.710671	piRNA_cluster_flamenco
Deadlock	piRNA_cluster_flamenco.6	76.5133	0.414377	0.762513	0.543437	0.586829	0.716941	piRNA_cluster_flamenco
Deadlock	piRNA_cluster_42AB.7	8.59197	-0.933405	1.71968	-0.542777	0.587283	NA	piRNA_cluster_42AB
Deadlock	piRNA_cluster_flamenco.205	13.7551	0.727596	1.36331	0.533699	0.59355	0.718648	piRNA_cluster_flamenco
Deadlock	piRNA_cluster_80F.48	18.9797	-0.665033	1.25907	-0.528194	0.597365	0.720038	piRNA_cluster_80F
Deadlock	piRNA_cluster_20A.34	9.52546	0.80813	1.58646	0.509392	0.610478	0.732573	piRNA_cluster_20A
Deadlock	piRNA_cluster_flamenco.5	98.3904	-0.395727	0.783316	-0.505195	0.613422	0.732849	piRNA_cluster_flamenco
Deadlock	piRNA_cluster_42AB.234	6.62909	-0.967832	1.92542	-0.502661	0.615203	NA	piRNA_cluster_42AB
Deadlock	piRNA_cluster_flamenco.207	2.88252	-1.45692	2.90269	-0.501922	0.615723	NA	piRNA_cluster_flamenco
Deadlock	piRNA_cluster_20A.56	972.839	0.281732	0.56335	0.500101	0.617004	0.733881	piRNA_cluster_20A
Deadlock	piRNA_cluster_20A.14	4.83442	-1.10063	2.26156	-0.486669	0.626493	NA	piRNA_cluster_20A
Deadlock	piRNA_cluster_20A.18	536.944	0.294216	0.616347	0.477355	0.633109	0.749551	piRNA_cluster_20A
Deadlock	piRNA_cluster_flamenco.1	34.1574	-0.471631	0.999013	-0.472097	0.636858	0.749551	piRNA_cluster_flamenco
Deadlock	piRNA_cluster_flamenco.108	15.6283	0.584049	1.28811	0.453414	0.650251	0.760033	piRNA_cluster_flamenco
Deadlock	piRNA_cluster_flamenco.104	7.86499	0.780275	1.7225	0.452989	0.650557	NA	piRNA_cluster_flamenco
Deadlock	piRNA_cluster_flamenco.152	4.66621	-1.03246	2.29868	-0.449153	0.653321	NA	piRNA_cluster_flamenco
Deadlock	piRNA_cluster_42AB.18	9.70284	-0.714433	1.62088	-0.440769	0.65938	0.767382	piRNA_cluster_42AB
Deadlock	piRNA_cluster_flamenco.46	3.43337	1.08234	2.49835	0.433223	0.664853	NA	piRNA_cluster_flamenco
Deadlock	piRNA_cluster_flamenco.109	3.55678	1.0342	2.42985	0.425622	0.670383	NA	piRNA_cluster_flamenco
Deadlock	piRNA_cluster_20A.12	6.24788	-0.838612	1.98221	-0.423068	0.672245	NA	piRNA_cluster_20A
Deadlock	piRNA_cluster_42AB.22	10.9701	-0.660362	1.62688	-0.405908	0.68481	0.793557	piRNA_cluster_42AB
Deadlock	piRNA_cluster_42AB.24	4.29598	-0.934602	2.34153	-0.399141	0.68979	NA	piRNA_cluster_42AB
Deadlock	piRNA_cluster_38C2.21	18.7669	-0.471655	1.22403	-0.38533	0.699993	0.807684	piRNA_cluster_38C2
Deadlock	piRNA_cluster_38C1.4	4.12778	-0.858242	2.37362	-0.361575	0.71767	NA	piRNA_cluster_38C1
Deadlock	piRNA_cluster_flamenco.26	43.4171	0.331356	0.938124	0.353211	0.72393	0.83175	piRNA_cluster_flamenco
Deadlock	piRNA_cluster_42AB.39	42.5633	0.33082	0.982699	0.336644	0.736385	0.838567	piRNA_cluster_42AB
Deadlock	piRNA_cluster_42AB.1	334.216	0.216503	0.646773	0.334743	0.737819	0.838567	piRNA_cluster_42AB
Deadlock	piRNA_cluster_flamenco.4	69.4272	-0.272461	0.818353	-0.332938	0.739181	0.838567	piRNA_cluster_flamenco
Deadlock	piRNA_cluster_38C1.8	25.4301	-0.353754	1.08364	-0.326448	0.744085	0.840598	piRNA_cluster_38C1
Deadlock	piRNA_cluster_80F.42	20.4968	0.37211	1.15701	0.321615	0.747744	0.841212	piRNA_cluster_80F
Deadlock	piRNA_cluster_flamenco.75	40.2826	1.5264	4.84144	0.315279	0.75255	0.843106	piRNA_cluster_flamenco
Deadlock	piRNA_cluster_42AB.3	147.267	0.214029	0.696743	0.307185	0.758703	0.846486	piRNA_cluster_42AB
Deadlock	piRNA_cluster_20A.55	515.094	0.16886	0.587905	0.287223	0.773941	0.855093	piRNA_cluster_20A
Deadlock	piRNA_cluster_42AB.28	19.8686	0.33546	1.17853	0.284643	0.775917	0.855093	piRNA_cluster_42AB
Deadlock	piRNA_cluster_flamenco.117	8.36817	-0.455237	1.70278	-0.267349	0.7892	NA	piRNA_cluster_flamenco
Deadlock	piRNA_cluster_20A.10	6.98852	-0.498047	1.87634	-0.265435	0.790674	NA	piRNA_cluster_20A
Deadlock	piRNA_cluster_flamenco.212	6.82032	-0.446512	1.9013	-0.234846	0.814328	NA	piRNA_cluster_flamenco
Deadlock	piRNA_cluster_42AB.26	6.59671	0.437803	1.86641	0.23457	0.814543	NA	piRNA_cluster_42AB
Deadlock	piRNA_cluster_20A.27	42.0252	0.213068	0.958661	0.222255	0.824115	0.900487	piRNA_cluster_20A
Deadlock	piRNA_cluster_42AB.41	40.2835	-0.20581	0.926738	-0.22208	0.824251	0.900487	piRNA_cluster_42AB
Deadlock	piRNA_cluster_42AB.43	17.2082	-0.283469	1.29791	-0.218404	0.827114	0.900487	piRNA_cluster_42AB
Deadlock	piRNA_cluster_42AB.40	41.2024	-0.207888	0.972077	-0.213859	0.830657	0.900712	piRNA_cluster_42AB
Deadlock	piRNA_cluster_20A.8	5.03663	-0.453854	2.13144	-0.212933	0.831379	NA	piRNA_cluster_20A
Deadlock	piRNA_cluster_42AB.54	3.45496	-0.502587	2.53349	-0.198377	0.84275	NA	piRNA_cluster_42AB
Deadlock	piRNA_cluster_80F.12	32.4757	-0.19267	0.983853	-0.195832	0.844741	0.904605	piRNA_cluster_80F
Deadlock	piRNA_cluster_20A.54	343.002	0.112445	0.598606	0.187844	0.850999	0.904605	piRNA_cluster_20A
Deadlock	piRNA_cluster_80F.2	7.01173	0.325795	1.8052	0.180476	0.856779	NA	piRNA_cluster_80F
Deadlock	piRNA_cluster_flamenco.155	4.64462	0.364129	2.17858	0.167141	0.867259	NA	piRNA_cluster_flamenco
Deadlock	piRNA_cluster_42AB.33	37.4693	0.152738	0.951292	0.160558	0.872442	0.922224	piRNA_cluster_42AB
Deadlock	piRNA_cluster_80F.6	21.6728	-0.166567	1.15834	-0.143799	0.88566	0.930459	piRNA_cluster_80F
Deadlock	piRNA_cluster_flamenco.153	4.68942	0.307591	2.15946	0.142438	0.886734	NA	piRNA_cluster_flamenco
Deadlock	piRNA_cluster_42AB.29	17.3876	-0.171657	1.25559	-0.136714	0.891257	0.932711	piRNA_cluster_42AB
Deadlock	piRNA_cluster_flamenco.76	3.16334	-0.351456	2.62718	-0.133777	0.893579	NA	piRNA_cluster_flamenco
Deadlock	piRNA_cluster_42AB.25	3.36555	0.338399	2.78307	0.121592	0.903222	NA	piRNA_cluster_42AB
Deadlock	piRNA_cluster_42AB.27	8.8172	-0.192505	1.65189	-0.116536	0.907228	0.942121	piRNA_cluster_42AB
Deadlock	piRNA_cluster_42AB.196	27.0363	0.10227	1.04462	0.0979021	0.92201	0.953803	piRNA_cluster_42AB
Deadlock	piRNA_cluster_flamenco.37	43.4045	0.0788361	1.01531	0.077647	0.938109	0.963078	piRNA_cluster_flamenco
Deadlock	piRNA_cluster_20A.17	63.9659	0.055003	0.832802	0.0660457	0.947341	0.968872	piRNA_cluster_20A
Deadlock	piRNA_cluster_20A.31	153.308	-0.0308926	0.669505	-0.0461424	0.963197	0.977681	piRNA_cluster_20A
Deadlock	piRNA_cluster_20A.58	5.53045	-0.0786334	2.03264	-0.0386854	0.969141	NA	piRNA_cluster_20A
Deadlock	piRNA_cluster_flamenco.159	3.99358	-0.0289518	2.40926	-0.0120169	0.990412	NA	piRNA_cluster_flamenco
Deadlock	piRNA_cluster_42AB.108	21.2022	0.012377	1.17746	0.0105116	0.991613	0.993643	piRNA_cluster_42AB
Rhino_1	piRNA_cluster_42AB.47	525.527	6.35899	0.668947	9.50597	1.98195e-21	6.89717e-19	piRNA_cluster_42AB
Rhino_1	piRNA_cluster_42AB.46	459.88	6.42636	0.720056	8.92481	4.4646e-19	7.7684e-17	piRNA_cluster_42AB
Rhino_1	piRNA_cluster_42AB.74	125.198	-6.769	1.24335	-5.44416	5.20496e-08	6.03776e-06	piRNA_cluster_42AB
Rhino_1	piRNA_cluster_42AB.54	56.5997	5.16447	0.970982	5.31881	1.04449e-07	9.08704e-06	piRNA_cluster_42AB
Rhino_1	piRNA_cluster_42AB.45	73.0891	4.35982	0.858108	5.08073	3.7598e-07	2.61682e-05	piRNA_cluster_42AB
Rhino_1	piRNA_cluster_42AB.73	89.1488	-6.27447	1.26152	-4.97375	6.56691e-07	3.80881e-05	piRNA_cluster_42AB
Rhino_1	piRNA_cluster_42AB.251	183.973	3.34376	0.71252	4.69286	2.6941e-06	0.000133935	piRNA_cluster_42AB
Rhino_1	piRNA_cluster_42AB.88	69.1739	-5.321	1.16415	-4.57072	4.8606e-06	0.000211436	piRNA_cluster_42AB
Rhino_1	piRNA_cluster_42AB.89	81.9615	-7.16431	1.65132	-4.33853	1.4344e-05	0.000554635	piRNA_cluster_42AB
Rhino_1	piRNA_cluster_42AB.71	68.7821	-9.35291	2.18917	-4.27235	1.93426e-05	0.000673121	piRNA_cluster_42AB
Rhino_1	piRNA_cluster_42AB.52	58.2782	-9.12521	2.2421	-4.06994	4.70248e-05	0.0014877	piRNA_cluster_42AB
Rhino_1	piRNA_cluster_42AB.90	51.5913	-8.94551	2.225	-4.02045	5.80878e-05	0.00168454	piRNA_cluster_42AB
Rhino_1	piRNA_cluster_42AB.87	59.8052	-6.7096	1.67874	-3.9968	6.42049e-05	0.00171872	piRNA_cluster_42AB
Rhino_1	piRNA_cluster_42AB.75	55.5247	-6.5979	1.67028	-3.95018	7.80925e-05	0.00194116	piRNA_cluster_42AB
Rhino_1	piRNA_cluster_42AB.208	46.8935	-4.75309	1.22022	-3.89527	9.8091e-05	0.00227571	piRNA_cluster_42AB
Rhino_1	piRNA_cluster_80F.4	91.0958	3.01549	0.785181	3.8405	0.000122785	0.00254158	piRNA_cluster_80F
Rhino_1	piRNA_cluster_42AB.76	41.3299	-8.62682	2.24788	-3.83777	0.000124158	0.00254158	piRNA_cluster_42AB
Rhino_1	piRNA_cluster_20A.25	402.739	2.3672	0.627799	3.77063	0.000162837	0.00310985	piRNA_cluster_20A
Rhino_1	piRNA_cluster_42AB.220	46.4238	-5.33985	1.42011	-3.76018	0.000169791	0.00310985	piRNA_cluster_42AB
Rhino_1	piRNA_cluster_20A.26	423.095	2.46552	0.663626	3.71523	0.000203018	0.00353252	piRNA_cluster_20A
Rhino_1	piRNA_cluster_38C2.34	24.963	4.60053	1.25387	3.66906	0.00024344	0.00403414	piRNA_cluster_38C2
Rhino_1	piRNA_cluster_42AB.86	43.7824	-6.2582	1.71152	-3.65652	0.000255661	0.00404409	piRNA_cluster_42AB
Rhino_1	piRNA_cluster_42AB.78	33.6792	-8.33654	2.28782	-3.64387	0.000268565	0.00406351	piRNA_cluster_42AB
Rhino_1	piRNA_cluster_42AB.50	29.2307	-8.12745	2.29078	-3.5479	0.00038832	0.00563064	piRNA_cluster_42AB
Rhino_1	piRNA_cluster_20A.32	182.034	2.42502	0.68943	3.51744	0.000435738	0.00606548	piRNA_cluster_20A
Rhino_1	piRNA_cluster_42AB.224	35.0766	-4.92448	1.4107	-3.49081	0.000481555	0.00619094	piRNA_cluster_42AB
Rhino_1	piRNA_cluster_42AB.223	26.7441	-7.99125	2.29486	-3.48224	0.00049724	0.00619094	piRNA_cluster_42AB
Rhino_1	piRNA_cluster_42AB.77	39.6832	-6.12143	1.75903	-3.48	0.000501423	0.00619094	piRNA_cluster_42AB
Rhino_1	piRNA_cluster_80F.20	36.271	-5.9777	1.72151	-3.47236	0.000515911	0.00619094	piRNA_cluster_80F
Rhino_1	piRNA_cluster_42AB.218	50.1177	-3.59734	1.05217	-3.41895	0.000628624	0.00697602	piRNA_cluster_42AB
Rhino_1	piRNA_cluster_42AB.51	24.8987	-7.89487	2.31452	-3.41102	0.000647214	0.00697602	piRNA_cluster_42AB
Rhino_1	piRNA_cluster_42AB.250	64.4022	3.07173	0.900852	3.4098	0.0006501	0.00697602	piRNA_cluster_42AB
Rhino_1	piRNA_cluster_42AB.187	25.5036	-7.93802	2.33456	-3.40022	0.000673325	0.00697602	piRNA_cluster_42AB
Rhino_1	piRNA_cluster_42AB.59	24.1258	-7.8443	2.31423	-3.38959	0.000699979	0.00697602	piRNA_cluster_42AB
Rhino_1	piRNA_cluster_42AB.194	37.6992	-4.00344	1.18132	-3.38895	0.000701612	0.00697602	piRNA_cluster_42AB
Rhino_1	piRNA_cluster_42AB.60	23.914	-7.84105	2.33072	-3.36422	0.000767616	0.00742029	piRNA_cluster_42AB
Rhino_1	piRNA_cluster_42AB.239	22.7842	-7.75001	2.32501	-3.33332	0.000858158	0.00807133	piRNA_cluster_42AB
Rhino_1	piRNA_cluster_42AB.180	22.456	-7.7306	2.32694	-3.32222	0.000893037	0.00815493	piRNA_cluster_42AB
Rhino_1	piRNA_cluster_80F.32	22.2441	-7.72828	2.33077	-3.31577	0.000913915	0.00815493	piRNA_cluster_80F
Rhino_1	piRNA_cluster_42AB.219	43.1895	-4.21725	1.28076	-3.29276	0.000992091	0.00863119	piRNA_cluster_42AB
Rhino_1	piRNA_cluster_38C1.15	21.143	-7.6504	2.33854	-3.27144	0.00107002	0.00908212	piRNA_cluster_38C1
Rhino_1	piRNA_cluster_42AB.183	30.3724	-4.71624	1.4516	-3.24901	0.00115809	0.0094811	piRNA_cluster_42AB
Rhino_1	piRNA_cluster_42AB.191	31.4296	-4.77034	1.46973	-3.24573	0.00117152	0.0094811	piRNA_cluster_42AB
Rhino_1	piRNA_cluster_42AB.70	20.7632	-7.64189	2.3713	-3.22266	0.00127006	0.010045	piRNA_cluster_42AB
Rhino_1	piRNA_cluster_42AB.69	19.83	-7.56546	2.35806	-3.20835	0.00133501	0.010324	piRNA_cluster_42AB
Rhino_1	piRNA_cluster_42AB.216	33.2695	-4.25571	1.33137	-3.1965	0.00139107	0.0104433	piRNA_cluster_42AB
Rhino_1	piRNA_cluster_42AB.56	20.5151	-7.62786	2.3893	-3.19251	0.00141044	0.0104433	piRNA_cluster_42AB
Rhino_1	piRNA_cluster_80F.23	28.7806	-5.6492	1.77621	-3.18048	0.00147031	0.0106598	piRNA_cluster_80F
Rhino_1	piRNA_cluster_42AB.58	18.5247	-7.46165	2.36889	-3.14985	0.00163355	0.0114729	piRNA_cluster_42AB
Rhino_1	piRNA_cluster_42AB.217	35.5178	-3.92503	1.24919	-3.14205	0.0016777	0.0114729	piRNA_cluster_42AB
Rhino_1	piRNA_cluster_38C2.94	65.9964	2.72466	0.867339	3.14141	0.00168138	0.0114729	piRNA_cluster_38C2
Rhino_1	piRNA_cluster_42AB.15	36.2071	-3.59134	1.15028	-3.12215	0.00179536	0.0120151	piRNA_cluster_42AB
Rhino_1	piRNA_cluster_80F.14	25.7692	-5.47054	1.78363	-3.06708	0.00216164	0.0141934	piRNA_cluster_80F
Rhino_1	piRNA_cluster_42AB.68	16.4388	-7.29008	2.39923	-3.03851	0.00237748	0.0151978	piRNA_cluster_42AB
Rhino_1	piRNA_cluster_42AB.174	16.4026	-7.2764	2.39973	-3.03217	0.00242799	0.0151978	piRNA_cluster_42AB
Rhino_1	piRNA_cluster_42AB.193	16.3148	-7.28219	2.40337	-3.02999	0.00244562	0.0151978	piRNA_cluster_42AB
Rhino_1	piRNA_cluster_42AB.49	16.1907	-7.27418	2.40873	-3.01992	0.00252841	0.0154366	piRNA_cluster_42AB
Rhino_1	piRNA_cluster_80F.24	15.3377	-7.18287	2.41689	-2.97195	0.00295914	0.0176212	piRNA_cluster_80F
Rhino_1	piRNA_cluster_42AB.185	31.4339	-3.74138	1.26014	-2.96902	0.0029875	0.0176212	piRNA_cluster_42AB
Rhino_1	piRNA_cluster_80F.21	23.1432	-5.32615	1.81165	-2.93994	0.00328278	0.0190401	piRNA_cluster_80F
Rhino_1	piRNA_cluster_42AB.246	14.7175	-7.14	2.44017	-2.92603	0.00343317	0.0195106	piRNA_cluster_42AB
Rhino_1	piRNA_cluster_42AB.215	26.7791	-3.92699	1.34386	-2.92217	0.00347602	0.0195106	piRNA_cluster_42AB
Rhino_1	piRNA_cluster_42AB.259	60.7322	2.55324	0.882194	2.8942	0.00380128	0.0209975	piRNA_cluster_42AB
Rhino_1	piRNA_cluster_80F.15	13.7766	-7.04623	2.4624	-2.86153	0.004216	0.0227036	piRNA_cluster_80F
Rhino_1	piRNA_cluster_80F.34	13.6163	-7.02099	2.45516	-2.85969	0.00424061	0.0227036	piRNA_cluster_80F
Rhino_1	piRNA_cluster_42AB.222	21.2616	-5.20371	1.83399	-2.83737	0.00454862	0.0239836	piRNA_cluster_42AB
Rhino_1	piRNA_cluster_42AB.188	21.0574	-5.18922	1.83588	-2.82656	0.0047051	0.0244384	piRNA_cluster_42AB
Rhino_1	piRNA_cluster_38C1.7	40.7957	2.69056	0.953512	2.82174	0.00477636	0.0244437	piRNA_cluster_38C1
Rhino_1	piRNA_cluster_42AB.207	33.3638	-3.2128	1.14108	-2.81557	0.00486906	0.024557	piRNA_cluster_42AB
Rhino_1	piRNA_cluster_42AB.184	22.0003	-4.23037	1.5079	-2.80548	0.00502425	0.0247138	piRNA_cluster_42AB
Rhino_1	piRNA_cluster_42AB.240	21.1738	-5.20672	1.85667	-2.80433	0.00504219	0.0247138	piRNA_cluster_42AB
Rhino_1	piRNA_cluster_42AB.214	25.7505	-3.87602	1.38749	-2.79355	0.00521336	0.0251979	piRNA_cluster_42AB
Rhino_1	piRNA_cluster_42AB.192	28.3271	-3.58635	1.28949	-2.78122	0.00541555	0.0258166	piRNA_cluster_42AB
Rhino_1	piRNA_cluster_42AB.66	11.6545	-6.79377	2.50547	-2.71158	0.00669631	0.0314908	piRNA_cluster_42AB
Rhino_1	piRNA_cluster_42AB.186	21.3362	-4.20023	1.55752	-2.69674	0.00700213	0.0324899	piRNA_cluster_42AB
Rhino_1	piRNA_cluster_42AB.221	18.607	-5.00264	1.86379	-2.68412	0.00727202	0.0332982	piRNA_cluster_42AB
Rhino_1	piRNA_cluster_42AB.179	11.2461	-6.74047	2.51771	-2.67722	0.00742353	0.0335505	piRNA_cluster_42AB
Rhino_1	piRNA_cluster_42AB.206	22.7315	-3.68316	1.39286	-2.64431	0.00818575	0.0365035	piRNA_cluster_42AB
Rhino_1	piRNA_cluster_42AB.252	42.4732	2.46638	0.934179	2.64016	0.00828671	0.0365035	piRNA_cluster_42AB
Rhino_1	piRNA_cluster_20A.28	153.497	1.91075	0.725421	2.63398	0.008439	0.0367096	piRNA_cluster_20A
Rhino_1	piRNA_cluster_38C1.17	30.9058	-3.10129	1.18105	-2.62588	0.00864253	0.0371309	piRNA_cluster_38C1
Rhino_1	piRNA_cluster_38C1.19	10.1812	-6.60319	2.55956	-2.57982	0.00988528	0.0419522	piRNA_cluster_38C1
Rhino_1	piRNA_cluster_38C1.21	9.6927	-6.52366	2.57572	-2.53275	0.0113173	0.0474507	piRNA_cluster_38C1
Rhino_1	piRNA_cluster_42AB.176	9.72894	-6.54727	2.59151	-2.52643	0.0115227	0.047737	piRNA_cluster_42AB
Rhino_1	piRNA_cluster_80F.29	9.5324	-6.48564	2.58919	-2.5049	0.0122487	0.0495162	piRNA_cluster_80F
Rhino_1	piRNA_cluster_42AB.227	21.1341	-3.57858	1.43157	-2.49975	0.0124281	0.0495162	piRNA_cluster_42AB
Rhino_1	piRNA_cluster_38C2.73	9.36445	-6.47852	2.59169	-2.49973	0.0124288	0.0495162	piRNA_cluster_38C2
Rhino_1	piRNA_cluster_flamenco.116	56.0938	2.16578	0.867319	2.4971	0.0125213	0.0495162	piRNA_cluster_flamenco
Rhino_1	piRNA_cluster_38C2.23	9.08011	-6.42557	2.604	-2.46758	0.013603	0.0531894	piRNA_cluster_38C2
Rhino_1	piRNA_cluster_20A.24	670.568	1.50492	0.612659	2.45638	0.0140345	0.0542667	piRNA_cluster_20A
Rhino_1	piRNA_cluster_42AB.55	15.2158	-4.69949	1.9251	-2.44117	0.0146397	0.0559847	piRNA_cluster_42AB
Rhino_1	piRNA_cluster_42AB.67	15.128	-4.70676	1.93444	-2.43314	0.0149687	0.0566207	piRNA_cluster_42AB
Rhino_1	piRNA_cluster_42AB.228	8.70796	-6.38355	2.63291	-2.42452	0.0153287	0.0567709	piRNA_cluster_42AB
Rhino_1	piRNA_cluster_42AB.245	15.3684	-4.7408	1.95547	-2.42438	0.0153347	0.0567709	piRNA_cluster_42AB
Rhino_1	piRNA_cluster_42AB.205	14.7635	-4.66165	1.93499	-2.40914	0.0159903	0.0585751	piRNA_cluster_42AB
Rhino_1	piRNA_cluster_42AB.238	16.6836	-3.8213	1.60094	-2.38691	0.0169907	0.0615915	piRNA_cluster_42AB
Rhino_1	piRNA_cluster_42AB.57	8.25567	-6.31773	2.68222	-2.35541	0.0185024	0.065296	piRNA_cluster_42AB
Rhino_1	piRNA_cluster_80F.22	14.107	-4.60092	1.95456	-2.35394	0.0185756	0.065296	piRNA_cluster_80F
Rhino_1	piRNA_cluster_42AB.235	8.01522	-6.25297	2.66273	-2.34833	0.0188576	0.0656244	piRNA_cluster_42AB
Rhino_1	piRNA_cluster_42AB.72	25.9249	-2.82426	1.20657	-2.34074	0.0192456	0.0659462	piRNA_cluster_42AB
Rhino_1	piRNA_cluster_80F.37	14.2387	-4.58879	1.96176	-2.33912	0.019329	0.0659462	piRNA_cluster_80F
Rhino_1	piRNA_cluster_42AB.190	18.5674	-3.36694	1.44377	-2.33204	0.0196983	0.0665536	piRNA_cluster_42AB
Rhino_1	piRNA_cluster_42AB.213	7.84727	-6.24344	2.703	-2.30982	0.020898	0.069665	piRNA_cluster_42AB
Rhino_1	piRNA_cluster_42AB.182	13.6547	-4.56007	1.97608	-2.30763	0.0210196	0.069665	piRNA_cluster_42AB
Rhino_1	piRNA_cluster_42AB.178	7.65073	-6.16664	2.69267	-2.29016	0.022012	0.0722658	piRNA_cluster_42AB
Rhino_1	piRNA_cluster_80F.5	70.1896	2.029	0.895816	2.26498	0.0235142	0.076476	piRNA_cluster_80F
Rhino_1	piRNA_cluster_80F.30	13.0135	-4.44912	2.01026	-2.2132	0.0268837	0.0866254	piRNA_cluster_80F
Rhino_1	piRNA_cluster_38C2.19	6.87019	-6.03064	2.74302	-2.19854	0.0279108	0.0891098	piRNA_cluster_38C2
Rhino_1	piRNA_cluster_42AB.149	7.19078	-6.12823	2.79783	-2.19035	0.0284988	0.0901598	piRNA_cluster_42AB
Rhino_1	piRNA_cluster_80F.35	16.9338	-3.22169	1.47863	-2.17884	0.0293437	0.0915187	piRNA_cluster_80F
Rhino_1	piRNA_cluster_42AB.48	15.2026	-3.70255	1.70048	-2.17735	0.0294543	0.0915187	piRNA_cluster_42AB
Rhino_1	piRNA_cluster_38C1.13	11.817	-4.34082	2.02211	-2.14668	0.0318185	0.0979896	piRNA_cluster_38C1
Rhino_1	piRNA_cluster_42AB.65	6.78239	-6.04358	2.82456	-2.13966	0.0323826	0.0988523	piRNA_cluster_42AB
Rhino_1	piRNA_cluster_38C2.22	16.4376	-3.19019	1.4973	-2.13063	0.0331194	0.100222	piRNA_cluster_38C2
Rhino_1	piRNA_cluster_42AB.226	11.8532	-4.36007	2.05082	-2.12601	0.0335024	0.100507	piRNA_cluster_42AB
Rhino_1	piRNA_cluster_38C2.18	6.33775	-5.9196	2.79215	-2.12009	0.0339985	NA	piRNA_cluster_38C2
Rhino_1	piRNA_cluster_38C2.85	6.29385	-5.92763	2.82788	-2.09614	0.03607	NA	piRNA_cluster_38C2
Rhino_1	piRNA_cluster_42AB.197	6.05341	-5.84047	2.81592	-2.07409	0.0380712	NA	piRNA_cluster_42AB
Rhino_1	piRNA_cluster_38C1.29	6.22136	-5.85139	2.83994	-2.06039	0.0393611	NA	piRNA_cluster_38C1
Rhino_1	piRNA_cluster_38C2.20	5.84921	-5.7887	2.83768	-2.03994	0.0413563	NA	piRNA_cluster_38C2
Rhino_1	piRNA_cluster_42AB.150	6.24995	-5.93065	2.92323	-2.0288	0.0424791	NA	piRNA_cluster_42AB
Rhino_1	piRNA_cluster_38C2.14	5.89311	-5.77824	2.85816	-2.02166	0.0432111	NA	piRNA_cluster_38C2
Rhino_1	piRNA_cluster_38C2.8	6.01716	-5.80038	2.87	-2.02104	0.0432759	NA	piRNA_cluster_38C2
Rhino_1	piRNA_cluster_38C1.26	5.76906	-5.75655	2.85552	-2.01594	0.0438066	NA	piRNA_cluster_38C1
Rhino_1	piRNA_cluster_42AB.189	5.76141	-5.8068	2.90768	-1.99706	0.0458191	NA	piRNA_cluster_42AB
Rhino_1	piRNA_cluster_38C1.2	10.3437	-4.14908	2.08485	-1.99011	0.0465784	0.138541	piRNA_cluster_38C1
Rhino_1	piRNA_cluster_42AB.249	10.2635	-4.13098	2.08068	-1.9854	0.0471002	0.138906	piRNA_cluster_42AB
Rhino_1	piRNA_cluster_38C2.91	5.39691	-5.69088	2.89565	-1.96532	0.0493773	NA	piRNA_cluster_38C2
Rhino_1	piRNA_cluster_42AB.242	9.93528	-4.08759	2.10043	-1.94607	0.0516466	0.151034	piRNA_cluster_42AB
Rhino_1	piRNA_cluster_38C2.84	5.27287	-5.66768	2.92688	-1.93642	0.0528157	NA	piRNA_cluster_38C2
Rhino_1	piRNA_cluster_80F.25	11.0956	-4.19789	2.17003	-1.93449	0.0530531	0.153	piRNA_cluster_80F
Rhino_1	piRNA_cluster_38C2.43	14.7162	-3.03243	1.56852	-1.93331	0.0531983	0.153	piRNA_cluster_38C2
Rhino_1	piRNA_cluster_42AB.20	24.5437	-2.27374	1.18313	-1.9218	0.0546306	0.153971	piRNA_cluster_42AB
Rhino_1	piRNA_cluster_42AB.225	16.6001	-2.76717	1.44051	-1.92097	0.0547352	0.153971	piRNA_cluster_42AB
Rhino_1	piRNA_cluster_38C2.25	14.4319	-2.99799	1.56302	-1.91808	0.0551009	0.153971	piRNA_cluster_38C2
Rhino_1	piRNA_cluster_38C1.20	5.11257	-5.5976	2.92593	-1.9131	0.0557349	NA	piRNA_cluster_38C1
Rhino_1	piRNA_cluster_42AB.17	24.412	-2.28051	1.19211	-1.913	0.055748	0.153971	piRNA_cluster_42AB
Rhino_1	piRNA_cluster_38C1.9	14.1113	-2.94389	1.5539	-1.89452	0.0581562	0.159357	piRNA_cluster_38C1
Rhino_1	piRNA_cluster_42AB.241	16.1917	-2.72752	1.44852	-1.88296	0.0597051	0.162323	piRNA_cluster_42AB
Rhino_1	piRNA_cluster_38C2.3	4.90837	-5.53609	2.9551	-1.87341	0.0610124	NA	piRNA_cluster_38C2
Rhino_1	piRNA_cluster_20A.23	1512.17	1.25771	0.675482	1.86194	0.0626114	0.167606	piRNA_cluster_20A
Rhino_1	piRNA_cluster_38C2.37	15.7031	-2.67436	1.45343	-1.84003	0.0657632	0.174699	piRNA_cluster_38C2
Rhino_1	piRNA_cluster_80F.33	11.2867	-3.23136	1.76361	-1.83224	0.0669154	0.176413	piRNA_cluster_80F
Rhino_1	piRNA_cluster_38C1.30	4.70418	-5.47183	2.98696	-1.83191	0.0669656	NA	piRNA_cluster_38C1
Rhino_1	piRNA_cluster_80F.26	5.20037	-5.57853	3.04959	-1.82927	0.0673586	NA	piRNA_cluster_80F
Rhino_1	piRNA_cluster_flamenco.133	13.9111	2.61771	1.43249	1.82739	0.0676411	0.176986	piRNA_cluster_flamenco
Rhino_1	piRNA_cluster_38C2.1	4.58013	-5.4458	3.00645	-1.81137	0.0700831	NA	piRNA_cluster_38C2
Rhino_1	piRNA_cluster_38C1.14	4.49998	-5.40456	3.02194	-1.78844	0.0737048	NA	piRNA_cluster_38C1
Rhino_1	piRNA_cluster_42AB.136	4.45608	-5.41893	3.03781	-1.78383	0.0744513	NA	piRNA_cluster_42AB
Rhino_1	piRNA_cluster_38C2.32	3.15135	5.69923	3.19685	1.78277	0.0746241	NA	piRNA_cluster_38C2
Rhino_1	piRNA_cluster_38C2.2	4.41983	-5.36239	3.05662	-1.75435	0.0793707	NA	piRNA_cluster_38C2
Rhino_1	piRNA_cluster_38C2.4	4.41983	-5.36239	3.05662	-1.75435	0.0793707	NA	piRNA_cluster_38C2
Rhino_1	piRNA_cluster_42AB.237	8.30171	-3.81067	2.1804	-1.74769	0.0805169	0.207555	piRNA_cluster_42AB
Rhino_1	piRNA_cluster_38C2.13	4.33203	-5.39061	3.0859	-1.74686	0.0806625	NA	piRNA_cluster_38C2
Rhino_1	piRNA_cluster_38C1.1	4.29578	-5.33399	3.06054	-1.74283	0.0813637	NA	piRNA_cluster_38C1
Rhino_1	piRNA_cluster_42AB.16	30.7089	-1.86785	1.07881	-1.7314	0.0833802	0.211954	piRNA_cluster_42AB
Rhino_1	piRNA_cluster_38C2.46	10.3458	-3.1003	1.80781	-1.71494	0.0863558	0.2162	piRNA_cluster_38C2
Rhino_1	piRNA_cluster_42AB.195	17.2873	-2.498	1.46387	-1.70644	0.0879269	0.218561	piRNA_cluster_42AB
Rhino_1	piRNA_cluster_38C2.16	4.04769	-5.2761	3.10939	-1.69683	0.0897294	NA	piRNA_cluster_38C2
Rhino_1	piRNA_cluster_80F.31	10.1054	-3.04161	1.82524	-1.66642	0.0956302	0.236023	piRNA_cluster_80F
Rhino_1	piRNA_cluster_38C1.11	3.88739	-5.18157	3.15143	-1.64419	0.100136	NA	piRNA_cluster_38C1
Rhino_1	piRNA_cluster_42AB.177	7.60897	-3.66502	2.22953	-1.64385	0.100207	0.245578	piRNA_cluster_42AB
Rhino_1	piRNA_cluster_38C2.74	9.73323	-3.00333	1.83734	-1.63461	0.102131	0.24807	piRNA_cluster_38C2
Rhino_1	piRNA_cluster_38C2.80	3.76334	-5.14978	3.16549	-1.62685	0.103768	NA	piRNA_cluster_38C2
Rhino_1	piRNA_cluster_38C2.95	3.71944	-5.16668	3.20043	-1.61437	0.106447	NA	piRNA_cluster_38C2
Rhino_1	piRNA_cluster_flamenco.107	23.4834	1.84399	1.14321	1.61298	0.106748	0.256195	piRNA_cluster_flamenco
Rhino_1	piRNA_cluster_20A.22	2744.27	1.02412	0.636364	1.60934	0.107543	0.256335	piRNA_cluster_20A
Rhino_1	piRNA_cluster_38C2.6	3.55914	-5.06513	3.21681	-1.57458	0.115353	NA	piRNA_cluster_38C2
Rhino_1	piRNA_cluster_20A.31	244.715	1.01575	0.647332	1.56913	0.116617	0.276072	piRNA_cluster_20A
Rhino_1	piRNA_cluster_42AB.141	3.51524	-5.08347	3.24664	-1.56576	0.117404	NA	piRNA_cluster_42AB
Rhino_1	piRNA_cluster_42AB.236	3.51524	-5.08347	3.24664	-1.56576	0.117404	NA	piRNA_cluster_42AB
Rhino_1	piRNA_cluster_flamenco.129	32.3608	1.57951	1.01439	1.5571	0.119447	0.280862	piRNA_cluster_flamenco
Rhino_1	piRNA_cluster_42AB.247	3.4351	-5.03084	3.24691	-1.54942	0.12128	NA	piRNA_cluster_42AB
Rhino_1	piRNA_cluster_38C2.15	3.4351	-5.03084	3.24691	-1.54942	0.12128	NA	piRNA_cluster_38C2
Rhino_1	piRNA_cluster_38C2.42	11.3613	-2.64399	1.73355	-1.52519	0.127211	0.297111	piRNA_cluster_38C2
Rhino_1	piRNA_cluster_38C2.48	4.74745	3.57552	2.36821	1.5098	0.131095	NA	piRNA_cluster_38C2
Rhino_1	piRNA_cluster_42AB.244	6.62424	-3.47794	2.31105	-1.50492	0.132345	0.305006	piRNA_cluster_42AB
Rhino_1	piRNA_cluster_flamenco.205	23.8095	1.70956	1.14235	1.49653	0.134516	0.30797	piRNA_cluster_flamenco
Rhino_1	piRNA_cluster_42AB.107	3.2309	-4.93874	3.30369	-1.49492	0.134936	NA	piRNA_cluster_42AB
Rhino_1	piRNA_cluster_42AB.234	6.54409	-3.44763	2.31408	-1.48985	0.136264	0.309934	piRNA_cluster_42AB
Rhino_1	piRNA_cluster_42AB.142	3.187	-4.95645	3.38641	-1.46363	0.143295	NA	piRNA_cluster_42AB
Rhino_1	piRNA_cluster_80F.38	6.21584	-3.37815	2.34818	-1.43863	0.150256	NA	piRNA_cluster_80F
Rhino_1	piRNA_cluster_20A.57	49.2891	1.34088	0.934798	1.43441	0.151456	0.341006	piRNA_cluster_20A
Rhino_1	piRNA_cluster_38C2.17	6.25974	-3.36508	2.34959	-1.4322	0.152086	NA	piRNA_cluster_38C2
Rhino_1	piRNA_cluster_80F.10	34.8858	-1.44037	1.00656	-1.43098	0.152436	0.341006	piRNA_cluster_80F
Rhino_1	piRNA_cluster_flamenco.115	13.2954	2.0847	1.4619	1.42602	0.153863	0.341006	piRNA_cluster_flamenco
Rhino_1	piRNA_cluster_42AB.23	22.359	-1.79201	1.26557	-1.41597	0.156785	0.341006	piRNA_cluster_42AB
Rhino_1	piRNA_cluster_42AB.4	19.7901	-1.75375	1.2666	-1.38461	0.166172	0.356961	piRNA_cluster_42AB
Rhino_1	piRNA_cluster_38C2.38	12.3405	-2.32519	1.68509	-1.37986	0.167629	0.357884	piRNA_cluster_38C2
Rhino_1	piRNA_cluster_38C2.12	2.7786	-4.75666	3.5141	-1.35359	0.175866	NA	piRNA_cluster_38C2
Rhino_1	piRNA_cluster_42AB.260	71.9037	1.14951	0.855323	1.34395	0.178963	0.374689	piRNA_cluster_42AB
Rhino_1	piRNA_cluster_20A.27	66.0922	1.16526	0.869193	1.34063	0.180042	0.374689	piRNA_cluster_20A
Rhino_1	piRNA_cluster_42AB.196	44.9235	1.20801	0.902823	1.33804	0.180884	0.374689	piRNA_cluster_42AB
Rhino_1	piRNA_cluster_42AB.175	5.60325	-3.21389	2.41441	-1.33113	0.183147	NA	piRNA_cluster_42AB
Rhino_1	piRNA_cluster_42AB.9	20.4926	-1.61967	1.22581	-1.3213	0.186401	0.383036	piRNA_cluster_42AB
Rhino_1	piRNA_cluster_flamenco.41	54.4081	1.1409	0.864867	1.31916	0.187115	0.383036	piRNA_cluster_flamenco
Rhino_1	piRNA_cluster_38C2.96	5.52311	-3.17676	2.42997	-1.30733	0.191102	NA	piRNA_cluster_38C2
Rhino_1	piRNA_cluster_42AB.144	2.57441	-4.64518	3.59113	-1.29351	0.195834	NA	piRNA_cluster_42AB
Rhino_1	piRNA_cluster_42AB.147	2.57441	-4.64518	3.59113	-1.29351	0.195834	NA	piRNA_cluster_42AB
Rhino_1	piRNA_cluster_38C1.24	5.31891	-3.1158	2.45888	-1.26716	0.205097	NA	piRNA_cluster_38C1
Rhino_1	piRNA_cluster_38C1.16	9.12278	-2.25436	1.7808	-1.26593	0.205539	0.414122	piRNA_cluster_38C1
Rhino_1	piRNA_cluster_38C1.6	7.23897	-2.54311	2.01036	-1.265	0.205871	0.414122	piRNA_cluster_38C1
Rhino_1	piRNA_cluster_20A.19	363.871	0.826582	0.661706	1.24917	0.211604	0.421301	piRNA_cluster_20A
Rhino_1	piRNA_cluster_80F.11	47.5486	-1.16511	0.945024	-1.23289	0.217616	0.430286	piRNA_cluster_80F
Rhino_1	piRNA_cluster_flamenco.8	126.956	0.865365	0.706578	1.22473	0.220679	0.432331	piRNA_cluster_flamenco
Rhino_1	piRNA_cluster_flamenco.27	21.3551	1.42832	1.17269	1.21799	0.223229	0.432331	piRNA_cluster_flamenco
Rhino_1	piRNA_cluster_flamenco.31	10.639	1.88874	1.55202	1.21696	0.223619	0.432331	piRNA_cluster_flamenco
Rhino_1	piRNA_cluster_38C1.23	6.83058	-2.44759	2.04791	-1.19516	0.232023	0.441224	piRNA_cluster_38C1
Rhino_1	piRNA_cluster_38C2.39	4.86661	-3.00373	2.51577	-1.19396	0.232493	NA	piRNA_cluster_38C2
Rhino_1	piRNA_cluster_38C2.92	6.78667	-2.45988	2.06986	-1.18843	0.234664	0.443821	piRNA_cluster_38C2
Rhino_1	piRNA_cluster_flamenco.131	63.0221	1.10172	0.942774	1.1686	0.242566	0.456287	piRNA_cluster_flamenco
Rhino_1	piRNA_cluster_42AB.19	23.3655	-1.37845	1.19222	-1.1562	0.247597	0.463206	piRNA_cluster_42AB
Rhino_1	piRNA_cluster_20A.18	727.122	0.732968	0.6357	1.15301	0.248907	0.463206	piRNA_cluster_20A
Rhino_1	piRNA_cluster_80F.44	2340.63	0.711434	0.620454	1.14663	0.251533	0.464465	piRNA_cluster_80F
Rhino_1	piRNA_cluster_80F.36	9.85391	-1.94329	1.69735	-1.1449	0.252252	0.464465	piRNA_cluster_80F
Rhino_1	piRNA_cluster_38C2.24	8.21819	-2.11639	1.85492	-1.14096	0.253886	0.465013	piRNA_cluster_38C2
Rhino_1	piRNA_cluster_20A.21	4401.84	0.670986	0.590175	1.13693	0.255569	0.465643	piRNA_cluster_20A
Rhino_1	piRNA_cluster_80F.28	12.7971	-1.70872	1.51181	-1.13025	0.258371	0.466425	piRNA_cluster_80F
Rhino_1	piRNA_cluster_80F.50	1433.28	0.661741	0.58586	1.12952	0.258678	0.466425	piRNA_cluster_80F
Rhino_1	piRNA_cluster_42AB.181	6.29813	-2.32568	2.10462	-1.10504	0.269144	NA	piRNA_cluster_42AB
Rhino_1	piRNA_cluster_42AB.140	2.24616	-4.46231	4.04053	-1.10439	0.269425	NA	piRNA_cluster_42AB
Rhino_1	piRNA_cluster_38C2.71	2.24616	-4.46231	4.04053	-1.10439	0.269425	NA	piRNA_cluster_38C2
Rhino_1	piRNA_cluster_20A.13	6.46608	-2.33134	2.11681	-1.10135	0.270745	0.480711	piRNA_cluster_20A
Rhino_1	piRNA_cluster_38C1.5	6.46608	-2.33134	2.11681	-1.10135	0.270745	0.480711	piRNA_cluster_38C1
Rhino_1	piRNA_cluster_80F.9	68.9884	-0.904617	0.829448	-1.09062	0.275438	0.486455	piRNA_cluster_80F
Rhino_1	piRNA_cluster_42AB.258	11.1276	1.66131	1.52752	1.08759	0.276776	0.486455	piRNA_cluster_42AB
Rhino_1	piRNA_cluster_80F.43	1648.14	0.672008	0.623218	1.07829	0.280906	0.491232	piRNA_cluster_80F
Rhino_1	piRNA_cluster_flamenco.102	24.2566	1.21995	1.13764	1.07235	0.283564	0.493401	piRNA_cluster_flamenco
Rhino_1	piRNA_cluster_flamenco.6	100.811	0.774573	0.738009	1.04954	0.293928	0.505195	piRNA_cluster_flamenco
Rhino_1	piRNA_cluster_flamenco.9	43.6944	0.952892	0.909358	1.04787	0.294697	0.505195	piRNA_cluster_flamenco
Rhino_1	piRNA_cluster_38C1.22	5.96989	-2.25029	2.14964	-1.04682	0.295182	NA	piRNA_cluster_38C1
Rhino_1	piRNA_cluster_38C1.25	4.17388	-2.73522	2.65063	-1.03191	0.302114	NA	piRNA_cluster_38C1
Rhino_1	piRNA_cluster_20A.7	4.42043	2.44532	2.37473	1.02972	0.303139	NA	piRNA_cluster_20A
Rhino_1	piRNA_cluster_flamenco.7	134.653	0.722066	0.706073	1.02265	0.306473	0.522807	piRNA_cluster_flamenco
Rhino_1	piRNA_cluster_flamenco.24	9.85971	1.62426	1.59963	1.0154	0.309916	0.524038	piRNA_cluster_flamenco
Rhino_1	piRNA_cluster_flamenco.134	7.69278	1.80655	1.78022	1.01479	0.310206	0.524038	piRNA_cluster_flamenco
Rhino_1	piRNA_cluster_80F.39	14.4789	-1.4133	1.39755	-1.01127	0.311887	0.524332	piRNA_cluster_80F
Rhino_1	piRNA_cluster_flamenco.176	25.3392	-1.26006	1.26433	-0.996623	0.318947	0.527632	piRNA_cluster_flamenco
Rhino_1	piRNA_cluster_20A.17	93.664	0.782724	0.79073	0.989875	0.322235	0.528952	piRNA_cluster_20A
Rhino_1	piRNA_cluster_80F.27	7.19721	-1.8937	1.93166	-0.980344	0.326916	0.534117	piRNA_cluster_80F
Rhino_1	piRNA_cluster_flamenco.163	3.51921	2.48092	2.56148	0.968548	0.332771	NA	piRNA_cluster_flamenco
Rhino_1	piRNA_cluster_38C1.12	5.51759	-2.14688	2.25664	-0.95136	0.341422	NA	piRNA_cluster_38C1
Rhino_1	piRNA_cluster_20A.56	1242.4	0.550142	0.581832	0.945534	0.344386	0.56003	piRNA_cluster_20A
Rhino_1	piRNA_cluster_flamenco.40	63.7844	0.762656	0.819534	0.930597	0.352062	0.56874	piRNA_cluster_flamenco
Rhino_1	piRNA_cluster_flamenco.132	10.5162	1.44207	1.55268	0.928765	0.353011	0.56874	piRNA_cluster_flamenco
Rhino_1	piRNA_cluster_flamenco.106	33.6182	0.980713	1.06182	0.923613	0.355688	0.570412	piRNA_cluster_flamenco
Rhino_1	piRNA_cluster_38C1.3	3.59753	-2.55612	2.78038	-0.919343	0.357916	NA	piRNA_cluster_38C1
Rhino_1	piRNA_cluster_flamenco.156	2.90448	2.71996	2.97377	0.91465	0.360375	NA	piRNA_cluster_flamenco
Rhino_1	piRNA_cluster_20A.54	457.944	0.555021	0.60776	0.913224	0.361125	0.574689	piRNA_cluster_20A
Rhino_1	piRNA_cluster_20A.10	6.95677	-1.79806	1.9758	-0.910044	0.362799	0.574689	piRNA_cluster_20A
Rhino_1	piRNA_cluster_42AB.34	29.2042	0.973824	1.07122	0.909078	0.363309	0.574689	piRNA_cluster_42AB
Rhino_1	piRNA_cluster_20A.34	13.4582	1.2778	1.41291	0.904372	0.365798	0.574945	piRNA_cluster_20A
Rhino_1	piRNA_cluster_38C2.44	11.0471	-1.42224	1.57871	-0.900888	0.367648	0.574945	piRNA_cluster_38C2
Rhino_1	piRNA_cluster_42AB.8	6.70867	-1.75997	1.97619	-0.890588	0.37315	0.579716	piRNA_cluster_42AB
Rhino_1	piRNA_cluster_flamenco.3	49.9339	-0.870348	0.996861	-0.873089	0.382615	0.589325	piRNA_cluster_flamenco
Rhino_1	piRNA_cluster_flamenco.120	18.5342	1.06386	1.22661	0.867314	0.38577	0.589325	piRNA_cluster_flamenco
Rhino_1	piRNA_cluster_38C2.21	31.2198	0.882766	1.02185	0.863894	0.387646	0.589325	piRNA_cluster_38C2
Rhino_1	piRNA_cluster_42AB.41	42.7115	-0.806676	0.934076	-0.863609	0.387803	0.589325	piRNA_cluster_42AB
Rhino_1	piRNA_cluster_42AB.109	17.7954	1.07385	1.25048	0.858748	0.390479	0.590364	piRNA_cluster_42AB
Rhino_1	piRNA_cluster_flamenco.39	42.5442	0.787469	0.92093	0.85508	0.392507	0.590364	piRNA_cluster_flamenco
Rhino_1	piRNA_cluster_20A.53	247.656	-0.549508	0.644093	-0.853151	0.393576	0.590364	piRNA_cluster_20A
Rhino_1	piRNA_cluster_80F.47	31.759	-0.908941	1.0986	-0.827367	0.408029	0.609417	piRNA_cluster_80F
Rhino_1	piRNA_cluster_42AB.198	3.18914	-2.36045	2.88425	-0.818392	0.413133	NA	piRNA_cluster_42AB
Rhino_1	piRNA_cluster_42AB.6	12.517	-1.15458	1.47123	-0.784772	0.432587	0.643335	piRNA_cluster_42AB
Rhino_1	piRNA_cluster_42AB.10	6.59227	-1.6834	2.17252	-0.774859	0.438423	0.648076	piRNA_cluster_42AB
Rhino_1	piRNA_cluster_42AB.1	425.476	0.503012	0.650696	0.773038	0.4395	0.648076	piRNA_cluster_42AB
Rhino_1	piRNA_cluster_38C2.75	8.63087	-1.3266	1.73389	-0.765103	0.44421	0.652258	piRNA_cluster_38C2
Rhino_1	piRNA_cluster_80F.13	51.2582	0.656483	0.869222	0.755253	0.450097	0.658125	piRNA_cluster_80F
Rhino_1	piRNA_cluster_20A.20	2635.9	0.430463	0.573711	0.750312	0.453067	0.659453	piRNA_cluster_20A
Rhino_1	piRNA_cluster_80F.40	24.9011	-0.857687	1.14749	-0.747445	0.454795	0.659453	piRNA_cluster_80F
Rhino_1	piRNA_cluster_42AB.2	371.779	0.462572	0.623053	0.742428	0.457828	0.661096	piRNA_cluster_42AB
Rhino_1	piRNA_cluster_38C1.4	4.41646	-1.75855	2.3855	-0.737185	0.46101	NA	piRNA_cluster_38C1
Rhino_1	piRNA_cluster_flamenco.77	3.31288	2.02669	2.79512	0.725081	0.468403	NA	piRNA_cluster_flamenco
Rhino_1	piRNA_cluster_flamenco.157	2.82219	2.14697	2.99542	0.71675	0.473528	NA	piRNA_cluster_flamenco
Rhino_1	piRNA_cluster_20A.55	656.935	0.434047	0.606032	0.716212	0.473861	0.678615	piRNA_cluster_20A
Rhino_1	piRNA_cluster_flamenco.25	92.9619	0.537627	0.762613	0.70498	0.480822	0.685117	piRNA_cluster_flamenco
Rhino_1	piRNA_cluster_flamenco.97	6.66537	1.49358	2.12595	0.702546	0.482338	0.685117	piRNA_cluster_flamenco
Rhino_1	piRNA_cluster_42AB.31	6.62698	1.3266	1.89843	0.698786	0.484686	0.685653	piRNA_cluster_42AB
Rhino_1	piRNA_cluster_38C1.10	2.6567	-2.08866	3.10503	-0.672668	0.501159	NA	piRNA_cluster_38C1
Rhino_1	piRNA_cluster_80F.49	50.0094	-0.639115	0.950517	-0.672387	0.501337	0.706337	piRNA_cluster_80F
Rhino_1	piRNA_cluster_flamenco.154	14.1543	0.90556	1.36712	0.662383	0.507726	0.712454	piRNA_cluster_flamenco
Rhino_1	piRNA_cluster_38C2.45	6.62301	-1.28671	1.9739	-0.65186	0.514492	0.713654	piRNA_cluster_38C2
Rhino_1	piRNA_cluster_42AB.7	10.1008	-1.02839	1.61308	-0.637531	0.523779	0.721322	piRNA_cluster_42AB
Rhino_1	piRNA_cluster_42AB.22	12.5478	-0.991317	1.57463	-0.629556	0.528985	0.721322	piRNA_cluster_42AB
Rhino_1	piRNA_cluster_20A.5	3.96937	1.48913	2.3799	0.625711	0.531504	NA	piRNA_cluster_20A
Rhino_1	piRNA_cluster_42AB.111	3.96937	1.48913	2.3799	0.625711	0.531504	NA	piRNA_cluster_42AB
Rhino_1	piRNA_cluster_flamenco.113	8.51293	1.08652	1.73796	0.625168	0.531861	0.721322	piRNA_cluster_flamenco
Rhino_1	piRNA_cluster_flamenco.135	15.3453	0.8372	1.33958	0.62497	0.531991	0.721322	piRNA_cluster_flamenco
Rhino_1	piRNA_cluster_flamenco.103	23.4797	0.704328	1.12893	0.623889	0.5327	0.721322	piRNA_cluster_flamenco
Rhino_1	piRNA_cluster_flamenco.117	13.8678	0.84432	1.37824	0.612606	0.540137	0.728557	piRNA_cluster_flamenco
Rhino_1	piRNA_cluster_flamenco.29	14.1905	0.861	1.43443	0.600239	0.548347	0.732091	piRNA_cluster_flamenco
Rhino_1	piRNA_cluster_flamenco.2	25.7507	-0.769986	1.29547	-0.594369	0.552265	0.732091	piRNA_cluster_flamenco
Rhino_1	piRNA_cluster_80F.2	9.98284	0.934466	1.57621	0.592858	0.553276	0.732091	piRNA_cluster_80F
Rhino_1	piRNA_cluster_flamenco.105	14.6428	0.794779	1.36725	0.581297	0.56104	0.739553	piRNA_cluster_flamenco
Rhino_1	piRNA_cluster_flamenco.158	3.23059	1.59094	2.82821	0.562525	0.573759	NA	piRNA_cluster_flamenco
Rhino_1	piRNA_cluster_20A.11	12.0306	-0.848686	1.51009	-0.562011	0.574109	0.750675	piRNA_cluster_20A
Rhino_1	piRNA_cluster_flamenco.26	53.567	0.505824	0.902934	0.560201	0.575343	0.750675	piRNA_cluster_flamenco
Rhino_1	piRNA_cluster_flamenco.108	19.1842	0.681673	1.21877	0.559312	0.575949	0.750675	piRNA_cluster_flamenco
Rhino_1	piRNA_cluster_flamenco.207	6.05401	1.0875	1.97114	0.551713	0.581145	NA	piRNA_cluster_flamenco
Rhino_1	piRNA_cluster_flamenco.30	2.7399	1.62746	3.03247	0.536678	0.59149	NA	piRNA_cluster_flamenco
Rhino_1	piRNA_cluster_80F.8	175.347	-0.3858	0.721859	-0.534453	0.593028	0.767189	piRNA_cluster_80F
Rhino_1	piRNA_cluster_flamenco.128	3.55883	1.32715	2.50279	0.53027	0.595925	NA	piRNA_cluster_flamenco
Rhino_1	piRNA_cluster_38C1.8	29.1604	-0.553566	1.05499	-0.524711	0.599784	0.773055	piRNA_cluster_38C1
Rhino_1	piRNA_cluster_42AB.27	13.2948	0.713403	1.4018	0.508919	0.610809	0.777809	piRNA_cluster_42AB
Rhino_1	piRNA_cluster_80F.45	40.8384	-0.494501	0.974721	-0.507326	0.611926	0.777809	piRNA_cluster_80F
Rhino_1	piRNA_cluster_42AB.110	33.0434	0.533991	1.054	0.506632	0.612413	0.777809	piRNA_cluster_42AB
Rhino_1	piRNA_cluster_42AB.18	11.3741	-0.754469	1.52363	-0.495178	0.620474	0.780527	piRNA_cluster_42AB
Rhino_1	piRNA_cluster_42AB.32	19.7968	0.597487	1.2094	0.494035	0.621281	0.780527	piRNA_cluster_42AB
Rhino_1	piRNA_cluster_flamenco.114	4.94859	1.05952	2.19118	0.483538	0.628714	NA	piRNA_cluster_flamenco
Rhino_1	piRNA_cluster_20A.58	5.60203	-0.981239	2.08513	-0.470589	0.637934	NA	piRNA_cluster_20A
Rhino_1	piRNA_cluster_80F.7	38.3267	-0.444448	0.954015	-0.465871	0.641308	0.800881	piRNA_cluster_80F
Rhino_1	piRNA_cluster_80F.3	253.852	-0.329081	0.708029	-0.464785	0.642085	0.800881	piRNA_cluster_80F
Rhino_1	piRNA_cluster_flamenco.151	4.79075	-1.13013	2.44174	-0.462838	0.643481	NA	piRNA_cluster_flamenco
Rhino_1	piRNA_cluster_flamenco.130	7.40538	0.801315	1.79173	0.44723	0.654709	0.813709	piRNA_cluster_flamenco
Rhino_1	piRNA_cluster_42AB.44	12.2695	0.639052	1.47559	0.433082	0.664955	0.819182	piRNA_cluster_42AB
Rhino_1	piRNA_cluster_flamenco.212	10.4769	0.681674	1.58367	0.430439	0.666876	0.819182	piRNA_cluster_flamenco
Rhino_1	piRNA_cluster_flamenco.75	62.1248	2.07036	4.8629	0.425745	0.670293	0.819182	piRNA_cluster_flamenco
Rhino_1	piRNA_cluster_42AB.108	22.7757	-0.500725	1.18033	-0.424225	0.671401	0.819182	piRNA_cluster_42AB
Rhino_1	piRNA_cluster_38C2.49	3.1483	1.16174	2.86736	0.405161	0.685359	NA	piRNA_cluster_38C2
Rhino_1	piRNA_cluster_80F.6	24.4135	-0.453582	1.13643	-0.399128	0.689799	0.833507	piRNA_cluster_80F
Rhino_1	piRNA_cluster_flamenco.38	41.0813	0.373091	0.945012	0.3948	0.69299	0.834466	piRNA_cluster_flamenco
Rhino_1	piRNA_cluster_42AB.28	19.5975	-0.47296	1.21758	-0.388444	0.697688	0.837225	piRNA_cluster_42AB
Rhino_1	piRNA_cluster_42AB.3	175.985	0.265768	0.695514	0.382118	0.702374	0.839953	piRNA_cluster_42AB
Rhino_1	piRNA_cluster_flamenco.110	4.29547	0.80047	2.27938	0.351179	0.725454	NA	piRNA_cluster_flamenco
Rhino_1	piRNA_cluster_42AB.38	46.7525	0.283797	0.900185	0.315265	0.75256	0.884767	piRNA_cluster_42AB
Rhino_1	piRNA_cluster_flamenco.119	7.57119	0.557296	1.80921	0.308032	0.758058	0.88679	piRNA_cluster_flamenco
Rhino_1	piRNA_cluster_20A.60	8.87774	-0.5121	1.67725	-0.305322	0.760121	0.88679	piRNA_cluster_20A
Rhino_1	piRNA_cluster_42AB.42	21.5907	0.367516	1.2267	0.299598	0.764484	0.88679	piRNA_cluster_42AB
Rhino_1	piRNA_cluster_42AB.30	34.7166	0.312251	1.05801	0.295131	0.767894	0.88679	piRNA_cluster_42AB
Rhino_1	piRNA_cluster_42AB.40	48.6161	-0.279745	0.954967	-0.292937	0.76957	0.88679	piRNA_cluster_42AB
Rhino_1	piRNA_cluster_flamenco.5	119.816	-0.219762	0.768408	-0.285996	0.774881	0.889963	piRNA_cluster_flamenco
Rhino_1	piRNA_cluster_42AB.37	64.095	0.230198	0.826687	0.278458	0.780661	0.892658	piRNA_cluster_42AB
Rhino_1	piRNA_cluster_flamenco.76	4.70386	0.549601	2.19536	0.250346	0.802319	NA	piRNA_cluster_flamenco
Rhino_1	piRNA_cluster_flamenco.136	5.64807	-0.513449	2.08675	-0.246052	0.805642	NA	piRNA_cluster_flamenco
Rhino_1	piRNA_cluster_42AB.5	14.7629	-0.305291	1.36874	-0.223045	0.8235	0.920857	piRNA_cluster_42AB
Rhino_1	piRNA_cluster_42AB.36	30.2301	0.226102	1.02609	0.220354	0.825596	0.920857	piRNA_cluster_42AB
Rhino_1	piRNA_cluster_flamenco.92	4.37685	-0.496379	2.28538	-0.217198	0.828054	NA	piRNA_cluster_flamenco
Rhino_1	piRNA_cluster_42AB.29	22.9037	0.24553	1.15026	0.213457	0.83097	0.922316	piRNA_cluster_42AB
Rhino_1	piRNA_cluster_42AB.257	3.35372	-0.550061	2.58281	-0.21297	0.83135	NA	piRNA_cluster_42AB
Rhino_1	piRNA_cluster_flamenco.153	5.72699	0.409103	2.00706	0.203832	0.838485	NA	piRNA_cluster_flamenco
Rhino_1	piRNA_cluster_flamenco.104	8.18377	0.350855	1.72887	0.202939	0.839182	0.922316	piRNA_cluster_flamenco
Rhino_1	piRNA_cluster_20A.14	6.34295	-0.394685	1.95856	-0.201518	0.840293	NA	piRNA_cluster_20A
Rhino_1	piRNA_cluster_80F.12	38.534	-0.1898	0.94882	-0.200038	0.841451	0.922316	piRNA_cluster_80F
Rhino_1	piRNA_cluster_20A.9	8.4331	-0.366471	1.83573	-0.199632	0.841769	0.922316	piRNA_cluster_20A
Rhino_1	piRNA_cluster_42AB.39	49.1897	0.18818	0.976188	0.19277	0.847139	0.924152	piRNA_cluster_42AB
Rhino_1	piRNA_cluster_flamenco.100	2.57532	0.590161	3.13719	0.188118	0.850784	NA	piRNA_cluster_flamenco
Rhino_1	piRNA_cluster_80F.42	23.356	0.20952	1.12932	0.185527	0.852816	0.927437	piRNA_cluster_80F
Rhino_1	piRNA_cluster_20A.12	8.06095	-0.306949	1.75457	-0.174943	0.861125	0.933556	piRNA_cluster_20A
Rhino_1	piRNA_cluster_flamenco.161	3.64235	0.422933	2.48129	0.170449	0.864657	NA	piRNA_cluster_flamenco
Rhino_1	piRNA_cluster_flamenco.1	45.9918	0.153954	0.919544	0.167424	0.867036	0.937046	piRNA_cluster_flamenco
Rhino_1	piRNA_cluster_flamenco.152	6.13875	-0.32358	1.99377	-0.162296	0.871073	NA	piRNA_cluster_flamenco
Rhino_1	piRNA_cluster_20A.15	5.93119	0.32087	1.97893	0.162143	0.871193	NA	piRNA_cluster_20A
Rhino_1	piRNA_cluster_42AB.53	6.82598	-0.321486	2.0001	-0.160734	0.872303	0.938962	piRNA_cluster_42AB
Rhino_1	piRNA_cluster_42AB.21	15.0494	-0.212448	1.35682	-0.156578	0.875577	0.938962	piRNA_cluster_42AB
Rhino_1	piRNA_cluster_20A.59	10.106	0.238477	1.57438	0.151473	0.879602	0.938962	piRNA_cluster_20A
Rhino_1	piRNA_cluster_80F.1	4.94768	-0.328668	2.18202	-0.150625	0.880271	NA	piRNA_cluster_80F
Rhino_1	piRNA_cluster_80F.48	24.4715	-0.167267	1.1494	-0.145526	0.884295	0.940725	piRNA_cluster_80F
Rhino_1	piRNA_cluster_flamenco.155	5.36035	0.284838	2.07674	0.137157	0.890907	NA	piRNA_cluster_flamenco
Rhino_1	piRNA_cluster_80F.46	28.2674	0.136221	1.04992	0.129744	0.896769	0.942383	piRNA_cluster_80F
Rhino_1	piRNA_cluster_flamenco.160	2.90357	0.342514	2.74356	0.124843	0.900648	NA	piRNA_cluster_flamenco
Rhino_1	piRNA_cluster_38C1.18	29.2534	-0.120404	1.0477	-0.114922	0.908507	0.94546	piRNA_cluster_38C1
Rhino_1	piRNA_cluster_42AB.43	22.1397	0.132405	1.19262	0.11102	0.9116	0.94546	piRNA_cluster_42AB
Rhino_1	piRNA_cluster_42AB.33	44.0884	0.0978164	0.931183	0.105045	0.91634	0.94625	piRNA_cluster_42AB
Rhino_1	piRNA_cluster_flamenco.159	4.61943	-0.208399	2.29874	-0.090658	0.927764	NA	piRNA_cluster_flamenco
Rhino_1	piRNA_cluster_42AB.24	6.33958	0.159806	1.92911	0.0828393	0.933979	NA	piRNA_cluster_42AB
Rhino_1	piRNA_cluster_flamenco.4	88.056	0.0643883	0.788877	0.0816201	0.934949	0.95977	piRNA_cluster_flamenco
Rhino_1	piRNA_cluster_flamenco.36	21.6852	0.0803765	1.16645	0.0689068	0.945064	0.962475	piRNA_cluster_flamenco
Rhino_1	piRNA_cluster_42AB.35	28.261	-0.0729652	1.06646	-0.0684184	0.945453	0.962475	piRNA_cluster_42AB
Rhino_1	piRNA_cluster_38C2.47	13.9065	0.0938983	1.38328	0.0678807	0.945881	0.962475	piRNA_cluster_38C2
Rhino_1	piRNA_cluster_20A.8	6.38134	-0.128082	1.92144	-0.0666596	0.946853	NA	piRNA_cluster_20A
Rhino_1	piRNA_cluster_42AB.25	3.59631	-0.168631	2.76978	-0.0608825	0.951453	NA	piRNA_cluster_42AB
Rhino_1	piRNA_cluster_flamenco.118	7.20027	-0.091087	1.8223	-0.0499845	0.960135	0.972199	piRNA_cluster_flamenco
Rhino_1	piRNA_cluster_38C2.76	12.5606	0.0703638	1.43987	0.048868	0.961025	0.972199	piRNA_cluster_38C2
Rhino_1	piRNA_cluster_flamenco.37	50.3435	0.0411666	0.992601	0.0414735	0.966918	0.974632	piRNA_cluster_flamenco
Rhino_1	piRNA_cluster_20A.16	11.5793	-0.0580655	1.4956	-0.0388242	0.969031	0.974632	piRNA_cluster_20A
Rhino_1	piRNA_cluster_flamenco.101	4.13089	0.0661268	2.33265	0.0283484	0.977384	NA	piRNA_cluster_flamenco
Rhino_1	piRNA_cluster_42AB.26	6.95217	-0.0511787	1.86669	-0.0274167	0.978127	0.980946	piRNA_cluster_42AB
Rhino_1	piRNA_cluster_80F.41	28.9942	-0.00453207	1.07615	-0.00421138	0.99664	0.99664	piRNA_cluster_80F

## Sheet: Rhi.Moon
Figure 3-figure supplement 2-source data. Log2 fold changes of total RNA abundance for piRNA clusters from RDC and Moon mutants. Data from (Andersen, et al. 2017).
protein	repeatID	baseMean	log2FoldChange	lfcSE	stat	pvalue	padj	note
Moonshiner	piRNA_cluster_42AB.251	101.858	3.04246	0.281764	10.7979	3.52126e-27	1.67612e-24	piRNA_cluster_42AB
Moonshiner	piRNA_cluster_38C2.94	74.5751	2.88603	0.320796	8.99645	2.33131e-19	5.54852e-17	piRNA_cluster_38C2
Moonshiner	piRNA_cluster_38C1.9	58.4342	3.38653	0.40226	8.41875	3.80527e-17	4.52827e-15	piRNA_cluster_38C1
Moonshiner	piRNA_cluster_38C1.8	65.2448	2.82009	0.340501	8.28218	1.20936e-16	1.15131e-14	piRNA_cluster_38C1
Moonshiner	piRNA_cluster_20A.55	320.094	1.00289	0.124568	8.05096	8.21475e-16	5.58603e-14	piRNA_cluster_20A
Moonshiner	piRNA_cluster_42AB.73	49.9958	-5.43115	0.691127	-7.85839	3.89102e-15	2.31516e-13	piRNA_cluster_42AB
Moonshiner	piRNA_cluster_20A.26	201.186	1.20989	0.157105	7.70112	1.34877e-14	7.13347e-13	piRNA_cluster_20A
Moonshiner	piRNA_cluster_42AB.88	50.3678	-5.77112	0.76226	-7.57106	3.702e-14	1.76215e-12	piRNA_cluster_42AB
Moonshiner	piRNA_cluster_42AB.87	38.9639	-4.17934	0.565497	-7.39057	1.46202e-13	6.32656e-12	piRNA_cluster_42AB
Moonshiner	piRNA_cluster_38C2.23	44.529	3.12563	0.440807	7.09069	1.33442e-12	5.15334e-11	piRNA_cluster_38C2
Moonshiner	piRNA_cluster_42AB.250	57.8315	2.42132	0.341835	7.08332	1.40743e-12	5.15334e-11	piRNA_cluster_42AB
Moonshiner	piRNA_cluster_42AB.75	37.9605	-5.03095	0.717644	-7.01037	2.37684e-12	7.55059e-11	piRNA_cluster_42AB
Moonshiner	piRNA_cluster_38C2.24	49.2266	2.66338	0.379928	7.01022	2.37939e-12	7.55059e-11	piRNA_cluster_38C2
Moonshiner	piRNA_cluster_42AB.76	38.4035	-3.37124	0.481818	-6.99692	2.61659e-12	7.78434e-11	piRNA_cluster_42AB
Moonshiner	piRNA_cluster_42AB.78	35.6952	-4.43222	0.638384	-6.94287	3.84211e-12	1.07579e-10	piRNA_cluster_42AB
Moonshiner	piRNA_cluster_42AB.89	66.7746	-7.1949	1.04226	-6.90316	5.08599e-12	1.34496e-10	piRNA_cluster_42AB
Moonshiner	piRNA_cluster_42AB.74	61.8557	-7.08433	1.04428	-6.78395	1.16935e-11	2.92953e-10	piRNA_cluster_42AB
Moonshiner	piRNA_cluster_80F.5	50.1263	2.44595	0.364726	6.70625	1.99688e-11	4.75258e-10	piRNA_cluster_80F
Moonshiner	piRNA_cluster_42AB.71	35.9872	-5.27689	0.788207	-6.69479	2.15975e-11	4.89543e-10	piRNA_cluster_42AB
Moonshiner	piRNA_cluster_20A.25	250.794	0.922763	0.139471	6.61618	3.68607e-11	7.97532e-10	piRNA_cluster_20A
Moonshiner	piRNA_cluster_38C2.22	51.7026	2.27399	0.348632	6.52261	6.90927e-11	1.42992e-09	piRNA_cluster_38C2
Moonshiner	piRNA_cluster_20A.56	718.356	0.55991	0.086413	6.47947	9.20436e-11	1.82553e-09	piRNA_cluster_20A
Moonshiner	piRNA_cluster_42AB.90	30.9393	-4.444	0.687037	-6.46836	9.90698e-11	1.88629e-09	piRNA_cluster_42AB
Moonshiner	piRNA_cluster_42AB.252	45.336	2.53001	0.397258	6.36867	1.90675e-10	3.49082e-09	piRNA_cluster_42AB
Moonshiner	piRNA_cluster_42AB.52	29.9283	-3.61424	0.583363	-6.19554	5.8087e-10	1.02405e-08	piRNA_cluster_42AB
Moonshiner	piRNA_cluster_38C2.25	39.6566	2.67797	0.434245	6.16695	6.96212e-10	1.18356e-08	piRNA_cluster_38C2
Moonshiner	piRNA_cluster_20A.32	115.983	1.26206	0.206007	6.12627	8.99618e-10	1.47661e-08	piRNA_cluster_20A
Moonshiner	piRNA_cluster_80F.4	56.6351	1.95677	0.321299	6.09019	1.12773e-09	1.78934e-08	piRNA_cluster_80F
Moonshiner	piRNA_cluster_42AB.48	41.0895	2.49017	0.413828	6.01741	1.77233e-09	2.72139e-08	piRNA_cluster_42AB
Moonshiner	piRNA_cluster_42AB.86	29.078	-5.39346	0.915312	-5.89247	3.80454e-09	5.65925e-08	piRNA_cluster_42AB
Moonshiner	piRNA_cluster_38C2.43	30.5251	3.37529	0.577257	5.84712	5.00148e-09	7.21426e-08	piRNA_cluster_38C2
Moonshiner	piRNA_cluster_42AB.72	26.9953	-3.61639	0.619462	-5.83796	5.2845e-09	7.3983e-08	piRNA_cluster_42AB
Moonshiner	piRNA_cluster_38C2.38	34.8031	2.7192	0.475474	5.71892	1.07206e-08	1.458e-07	piRNA_cluster_38C2
Moonshiner	piRNA_cluster_42AB.69	23.2714	-5.06403	0.941101	-5.38097	7.40874e-08	9.796e-07	piRNA_cluster_42AB
Moonshiner	piRNA_cluster_80F.20	29.4225	-2.73539	0.508893	-5.37517	7.65104e-08	9.84297e-07	piRNA_cluster_80F
Moonshiner	piRNA_cluster_42AB.245	33.2785	2.5673	0.481989	5.32647	1.00137e-07	1.24572e-06	piRNA_cluster_42AB
Moonshiner	piRNA_cluster_38C2.37	55.2473	2.89898	0.544613	5.32301	1.02066e-07	1.24572e-06	piRNA_cluster_38C2
Moonshiner	piRNA_cluster_42AB.77	21.1864	-4.48698	0.853886	-5.25478	1.48202e-07	1.7636e-06	piRNA_cluster_42AB
Moonshiner	piRNA_cluster_42AB.68	24.7616	-5.73894	1.10133	-5.2109	1.87927e-07	2.18178e-06	piRNA_cluster_42AB
Moonshiner	piRNA_cluster_38C2.93	26.0107	3.11614	0.603048	5.16732	2.37472e-07	2.69135e-06	piRNA_cluster_38C2
Moonshiner	piRNA_cluster_38C2.44	35.324	2.30198	0.452186	5.09077	3.56615e-07	3.94764e-06	piRNA_cluster_38C2
Moonshiner	piRNA_cluster_42AB.67	19.9779	-3.76855	0.749237	-5.02985	4.90866e-07	5.22368e-06	piRNA_cluster_42AB
Moonshiner	piRNA_cluster_flamenco.135	19.4923	7.62117	1.51554	5.02869	4.93835e-07	5.22368e-06	piRNA_cluster_flamenco
Moonshiner	piRNA_cluster_80F.23	26.1377	-2.75816	0.555716	-4.96326	6.93193e-07	7.17304e-06	piRNA_cluster_80F
Moonshiner	piRNA_cluster_42AB.183	21.9	-2.96246	0.619765	-4.77998	1.75317e-06	1.77555e-05	piRNA_cluster_42AB
Moonshiner	piRNA_cluster_42AB.180	16.5717	-4.55084	0.970329	-4.68999	2.73212e-06	2.70935e-05	piRNA_cluster_42AB
Moonshiner	piRNA_cluster_42AB.59	16.1997	-4.07796	0.875981	-4.65531	3.23499e-06	3.07972e-05	piRNA_cluster_42AB
Moonshiner	piRNA_cluster_42AB.50	19.1968	-3.07666	0.671568	-4.58131	4.62069e-06	4.31265e-05	piRNA_cluster_42AB
Moonshiner	piRNA_cluster_42AB.70	15.8535	-3.70533	0.817045	-4.53503	5.75945e-06	5.27211e-05	piRNA_cluster_42AB
Moonshiner	piRNA_cluster_80F.31	16.6061	-3.48947	0.770766	-4.52728	5.97471e-06	5.36597e-05	piRNA_cluster_80F
Moonshiner	piRNA_cluster_80F.36	18.6714	-3.20627	0.709	-4.52225	6.11869e-06	5.39351e-05	piRNA_cluster_80F
Moonshiner	piRNA_cluster_42AB.174	15.1957	-3.98566	0.883286	-4.51231	6.41248e-06	5.54971e-05	piRNA_cluster_42AB
Moonshiner	piRNA_cluster_20A.54	433.231	0.477315	0.106042	4.5012	6.75711e-06	5.74354e-05	piRNA_cluster_20A
Moonshiner	piRNA_cluster_flamenco.120	12.0582	6.92697	1.54285	4.48973	7.13144e-06	5.95537e-05	piRNA_cluster_flamenco
Moonshiner	piRNA_cluster_42AB.249	30.0428	2.20322	0.491914	4.47886	7.50421e-06	6.14492e-05	piRNA_cluster_42AB
Moonshiner	piRNA_cluster_80F.24	15.7338	-3.67513	0.821131	-4.47569	7.61661e-06	6.14492e-05	piRNA_cluster_80F
Moonshiner	piRNA_cluster_42AB.187	20.8051	-2.73713	0.617765	-4.43071	9.39252e-06	7.4514e-05	piRNA_cluster_42AB
Moonshiner	piRNA_cluster_80F.14	24.3437	-2.53702	0.579507	-4.3779	1.19831e-05	9.35071e-05	piRNA_cluster_80F
Moonshiner	piRNA_cluster_flamenco.134	10.6108	6.74502	1.56317	4.31495	1.59638e-05	0.000122561	piRNA_cluster_flamenco
Moonshiner	piRNA_cluster_38C2.48	16.3812	4.87329	1.13238	4.3036	1.68044e-05	0.000126967	piRNA_cluster_38C2
Moonshiner	piRNA_cluster_flamenco.129	15.361	4.17561	0.971721	4.29713	1.73025e-05	0.000128687	piRNA_cluster_flamenco
Moonshiner	piRNA_cluster_38C2.45	17.8234	3.07675	0.727279	4.2305	2.33176e-05	0.000170756	piRNA_cluster_38C2
Moonshiner	piRNA_cluster_42AB.51	18.2409	-2.82708	0.669767	-4.22099	2.43236e-05	0.000175425	piRNA_cluster_42AB
Moonshiner	piRNA_cluster_80F.30	22.1566	-2.35826	0.567456	-4.15585	3.24086e-05	0.000230246	piRNA_cluster_80F
Moonshiner	piRNA_cluster_38C1.7	23.2198	2.36911	0.571462	4.1457	3.38775e-05	0.000237143	piRNA_cluster_38C1
Moonshiner	piRNA_cluster_42AB.184	12.5025	-3.68497	0.902464	-4.08323	4.44135e-05	0.000306389	piRNA_cluster_42AB
Moonshiner	piRNA_cluster_42AB.110	18.1984	-2.64985	0.651988	-4.06426	4.81849e-05	0.000327657	piRNA_cluster_42AB
Moonshiner	piRNA_cluster_42AB.40	25.2734	-2.12473	0.526277	-4.03729	5.40713e-05	0.000362506	piRNA_cluster_42AB
Moonshiner	piRNA_cluster_20A.40	8.86004	6.48303	1.60733	4.0334	5.49747e-05	0.000363444	piRNA_cluster_20A
Moonshiner	piRNA_cluster_42AB.220	23.9793	-2.20547	0.548298	-4.0224	5.76093e-05	0.000375644	piRNA_cluster_42AB
Moonshiner	piRNA_cluster_42AB.246	52.7002	1.21716	0.305528	3.98377	6.78291e-05	0.000436306	piRNA_cluster_42AB
Moonshiner	piRNA_cluster_42AB.194	33.3965	-1.63694	0.415122	-3.94327	8.03782e-05	0.000510134	piRNA_cluster_42AB
Moonshiner	piRNA_cluster_80F.32	19.7131	-2.39533	0.609251	-3.93161	8.43797e-05	0.000528483	piRNA_cluster_80F
Moonshiner	piRNA_cluster_42AB.191	21.9709	-2.23902	0.570476	-3.92483	8.67916e-05	0.00053653	piRNA_cluster_42AB
Moonshiner	piRNA_cluster_flamenco.136	8.21156	6.37241	1.63435	3.89906	9.65681e-05	0.000589313	piRNA_cluster_flamenco
Moonshiner	piRNA_cluster_flamenco.140	8.0826	6.35359	1.64123	3.87124	0.000108281	0.000644273	piRNA_cluster_flamenco
Moonshiner	piRNA_cluster_42AB.57	10.9753	-3.92352	1.02537	-3.82646	0.000129999	0.000763943	piRNA_cluster_42AB
Moonshiner	piRNA_cluster_20A.23	751.963	0.318866	0.0838899	3.80101	0.000144109	0.000836535	piRNA_cluster_20A
Moonshiner	piRNA_cluster_38C1.18	32.1989	1.64407	0.434689	3.78218	0.000155461	0.000891558	piRNA_cluster_38C1
Moonshiner	piRNA_cluster_42AB.58	10.5932	-4.4873	1.18838	-3.77597	0.000159387	0.000903191	piRNA_cluster_42AB
Moonshiner	piRNA_cluster_42AB.17	15.4798	-2.54876	0.680711	-3.74426	0.000180927	0.00101319	piRNA_cluster_42AB
Moonshiner	piRNA_cluster_42AB.37	38.1355	-1.40327	0.376066	-3.73143	0.000190396	0.00105382	piRNA_cluster_42AB
Moonshiner	piRNA_cluster_80F.37	19.9287	-2.17076	0.589211	-3.68419	0.00022943	0.00124101	piRNA_cluster_80F
Moonshiner	piRNA_cluster_80F.29	12.2483	-2.9798	0.816562	-3.6492	0.000263059	0.00140692	piRNA_cluster_80F
Moonshiner	piRNA_cluster_38C1.13	22.1831	2.04983	0.56494	3.6284	0.000285181	0.00150726	piRNA_cluster_38C1
Moonshiner	piRNA_cluster_42AB.219	19.809	-2.14657	0.59204	-3.62572	0.000288152	0.00150726	piRNA_cluster_42AB
Moonshiner	piRNA_cluster_42AB.177	10.6721	-3.41608	0.944091	-3.61838	0.000296454	0.00153383	piRNA_cluster_42AB
Moonshiner	piRNA_cluster_42AB.185	19.4182	-2.13422	0.593174	-3.59796	0.00032072	0.00164154	piRNA_cluster_42AB
Moonshiner	piRNA_cluster_42AB.55	9.87427	-3.76181	1.05514	-3.56523	0.000363534	0.00184087	piRNA_cluster_42AB
Moonshiner	piRNA_cluster_38C2.90	6.82864	6.10718	1.73075	3.52862	0.00041773	0.00209305	piRNA_cluster_38C2
Moonshiner	piRNA_cluster_38C2.39	10.4778	3.59097	1.03015	3.48587	0.000490548	0.0024323	piRNA_cluster_38C2
Moonshiner	piRNA_cluster_42AB.218	33.3217	-1.42567	0.412228	-3.45845	0.000543287	0.00266603	piRNA_cluster_42AB
Moonshiner	piRNA_cluster_80F.10	26.6139	-1.67608	0.485199	-3.45442	0.000551483	0.00267863	piRNA_cluster_80F
Moonshiner	piRNA_cluster_38C1.22	17.252	2.28627	0.663013	3.4483	0.000564119	0.00268804	piRNA_cluster_38C1
Moonshiner	piRNA_cluster_42AB.66	11.2648	-2.85795	0.828868	-3.44802	0.000564713	0.00268804	piRNA_cluster_42AB
Moonshiner	piRNA_cluster_80F.25	10.6567	-3.07195	0.895461	-3.43058	0.000602285	0.00283849	piRNA_cluster_80F
Moonshiner	piRNA_cluster_38C2.91	18.2439	2.23349	0.652054	3.42532	0.000614084	0.00286572	piRNA_cluster_38C2
Moonshiner	piRNA_cluster_80F.35	20.6246	-1.93061	0.564153	-3.42213	0.000621326	0.00287137	piRNA_cluster_80F
Moonshiner	piRNA_cluster_80F.15	12.3328	-2.54282	0.746502	-3.40632	0.000658445	0.00301365	piRNA_cluster_80F
Moonshiner	piRNA_cluster_42AB.143	5.87766	-6.14059	1.83431	-3.34763	0.000815052	0.0036949	piRNA_cluster_42AB
Moonshiner	piRNA_cluster_42AB.41	24.8209	-1.67704	0.504513	-3.32408	0.000887123	0.00394645	piRNA_cluster_42AB
Moonshiner	piRNA_cluster_42AB.38	40.5214	-1.16524	0.353168	-3.29939	0.000968959	0.0042706	piRNA_cluster_42AB
Moonshiner	piRNA_cluster_flamenco.139	9.59281	5.11805	1.57083	3.25818	0.0011213	0.00489667	piRNA_cluster_flamenco
Moonshiner	piRNA_cluster_38C2.92	10.132	3.07344	0.949128	3.23817	0.001203	0.00520571	piRNA_cluster_38C2
Moonshiner	piRNA_cluster_42AB.54	19.3649	1.94499	0.606824	3.20519	0.00134972	0.00578798	piRNA_cluster_42AB
Moonshiner	piRNA_cluster_80F.34	10.7003	-2.76289	0.865846	-3.19098	0.00141793	0.00597286	piRNA_cluster_80F
Moonshiner	piRNA_cluster_42AB.108	14.476	-2.10826	0.665114	-3.16978	0.00152556	0.0063699	piRNA_cluster_42AB
Moonshiner	piRNA_cluster_38C2.42	15.5951	2.09235	0.660739	3.16668	0.00154192	0.00638221	piRNA_cluster_38C2
Moonshiner	piRNA_cluster_42AB.259	31.9328	1.37438	0.434383	3.16399	0.00155623	0.00638589	piRNA_cluster_42AB
Moonshiner	piRNA_cluster_80F.33	17.2866	-2.04032	0.652015	-3.12925	0.00175251	0.00712988	piRNA_cluster_80F
Moonshiner	piRNA_cluster_38C1.23	12.5018	2.28313	0.742426	3.07523	0.00210337	0.0084848	piRNA_cluster_38C1
Moonshiner	piRNA_cluster_42AB.56	7.68992	-3.99848	1.30338	-3.06778	0.00215655	0.0086262	piRNA_cluster_42AB
Moonshiner	piRNA_cluster_42AB.136	4.84777	-5.86108	1.92254	-3.04861	0.00229906	0.00911961	piRNA_cluster_42AB
Moonshiner	piRNA_cluster_20A.57	63.2575	0.844321	0.277315	3.04463	0.00232968	0.0091431	piRNA_cluster_20A
Moonshiner	piRNA_cluster_80F.22	15.2606	-1.92985	0.634223	-3.04286	0.0023434	0.0091431	piRNA_cluster_80F
Moonshiner	piRNA_cluster_20A.22	1465.77	0.190507	0.0629615	3.02576	0.00248007	0.00952852	piRNA_cluster_20A
Moonshiner	piRNA_cluster_42AB.186	13.6821	-2.01352	0.665515	-3.0255	0.00248222	0.00952852	piRNA_cluster_42AB
Moonshiner	piRNA_cluster_80F.12	29.4833	-1.33493	0.445209	-2.99844	0.00271366	0.0102516	piRNA_cluster_80F
Moonshiner	piRNA_cluster_42AB.176	7.43245	-3.94569	1.32339	-2.9815	0.00286843	0.010751	piRNA_cluster_42AB
Moonshiner	piRNA_cluster_flamenco.132	5.03489	5.66686	1.90701	2.97159	0.00296259	0.0110171	piRNA_cluster_flamenco
Moonshiner	piRNA_cluster_42AB.217	12.8391	-2.07633	0.700771	-2.96293	0.00304728	0.0112442	piRNA_cluster_42AB
Moonshiner	piRNA_cluster_80F.21	13.9478	-1.91068	0.653262	-2.92483	0.00344647	0.0125231	piRNA_cluster_80F
Moonshiner	piRNA_cluster_42AB.182	11.9172	-2.09155	0.71772	-2.91416	0.00356646	0.0128609	piRNA_cluster_42AB
Moonshiner	piRNA_cluster_80F.28	9.62522	-2.59598	0.893218	-2.90632	0.00365704	0.0130884	piRNA_cluster_80F
Moonshiner	piRNA_cluster_42AB.150	4.30913	-5.69115	1.96446	-2.89706	0.00376683	0.0133807	piRNA_cluster_42AB
Moonshiner	piRNA_cluster_80F.40	20.2128	-1.61282	0.55801	-2.8903	0.00384879	0.0135705	piRNA_cluster_80F
Moonshiner	piRNA_cluster_42AB.215	16.774	-1.74749	0.606331	-2.88207	0.00395067	0.0138273	piRNA_cluster_42AB
Moonshiner	piRNA_cluster_38C2.46	21.546	1.59357	0.555462	2.86891	0.00411884	0.0143107	piRNA_cluster_38C2
Moonshiner	piRNA_cluster_42AB.189	9.36995	-2.56116	0.894541	-2.8631	0.00419513	0.0144701	piRNA_cluster_42AB
Moonshiner	piRNA_cluster_42AB.224	28.8917	-1.27739	0.452332	-2.824	0.00474281	0.0162416	piRNA_cluster_42AB
Moonshiner	piRNA_cluster_flamenco.133	8.72536	2.84468	1.01561	2.80095	0.00509519	0.0173237	piRNA_cluster_flamenco
Moonshiner	piRNA_cluster_42AB.149	3.98056	-5.57967	1.9943	-2.79781	0.00514509	0.0173692	piRNA_cluster_42AB
Moonshiner	piRNA_cluster_80F.13	32.1834	-1.15688	0.41404	-2.79413	0.005204	0.0174444	piRNA_cluster_80F
Moonshiner	piRNA_cluster_80F.41	21.6088	-1.48771	0.533657	-2.78777	0.00530724	0.0176327	piRNA_cluster_80F
Moonshiner	piRNA_cluster_42AB.49	6.89381	-3.82973	1.37457	-2.78612	0.00533425	0.0176327	piRNA_cluster_42AB
Moonshiner	piRNA_cluster_38C1.20	12.2625	2.04675	0.735511	2.78276	0.00538988	0.0176937	piRNA_cluster_38C1
Moonshiner	piRNA_cluster_42AB.39	21.2422	-1.56627	0.565638	-2.76903	0.00562243	0.0183307	piRNA_cluster_42AB
Moonshiner	piRNA_cluster_42AB.216	14.1122	-1.78888	0.646665	-2.76632	0.00566928	0.0183577	piRNA_cluster_42AB
Moonshiner	piRNA_cluster_42AB.142	3.74679	-5.49071	1.99618	-2.75061	0.00594852	0.0191317	piRNA_cluster_42AB
Moonshiner	piRNA_cluster_42AB.16	16.145	-1.68968	0.615967	-2.74313	0.00608573	0.0194417	piRNA_cluster_42AB
Moonshiner	piRNA_cluster_42AB.35	8.38138	-2.67128	0.982846	-2.7179	0.00656975	0.020848	piRNA_cluster_42AB
Moonshiner	piRNA_cluster_80F.11	28.9784	-1.18937	0.44112	-2.69624	0.00701268	0.0221062	piRNA_cluster_80F
Moonshiner	piRNA_cluster_42AB.109	17.9137	-1.57307	0.585327	-2.68751	0.00719875	0.0225434	piRNA_cluster_42AB
Moonshiner	piRNA_cluster_38C2.76	18.059	1.65475	0.616275	2.68509	0.00725113	0.0225591	piRNA_cluster_38C2
Moonshiner	piRNA_cluster_80F.38	14.4038	-1.70992	0.639509	-2.67381	0.0074996	0.0231737	piRNA_cluster_80F
Moonshiner	piRNA_cluster_flamenco.205	15.8707	1.69367	0.633921	2.67173	0.00754606	0.0231737	piRNA_cluster_flamenco
Moonshiner	piRNA_cluster_38C1.15	21.8255	1.43302	0.54146	2.64659	0.00813085	0.0248095	piRNA_cluster_38C1
Moonshiner	piRNA_cluster_flamenco.138	3.63048	5.19641	1.99155	2.60923	0.00907466	0.0273053	piRNA_cluster_flamenco
Moonshiner	piRNA_cluster_42AB.36	10.4159	-2.03997	0.782351	-2.60749	0.0091209	0.0273053	piRNA_cluster_42AB
Moonshiner	piRNA_cluster_42AB.188	12.1157	-1.79601	0.689765	-2.60381	0.0092195	0.027428	piRNA_cluster_42AB
Moonshiner	piRNA_cluster_flamenco.119	3.69496	5.21874	2.01001	2.59637	0.00942138	0.0277498	piRNA_cluster_flamenco
Moonshiner	piRNA_cluster_flamenco.156	3.58749	5.18145	1.99715	2.59442	0.00947507	0.0277498	piRNA_cluster_flamenco
Moonshiner	piRNA_cluster_38C1.12	17.2888	1.61897	0.624855	2.59096	0.00957099	0.0277792	piRNA_cluster_38C1
Moonshiner	piRNA_cluster_80F.26	8.64273	-2.40767	0.934406	-2.57668	0.00997543	0.0287776	piRNA_cluster_80F
Moonshiner	piRNA_cluster_42AB.60	14.8991	-3.65181	1.42587	-2.56111	0.0104339	0.029919	piRNA_cluster_42AB
Moonshiner	piRNA_cluster_flamenco.127	3.39283	5.09934	1.99436	2.55688	0.0105615	0.0299262	piRNA_cluster_flamenco
Moonshiner	piRNA_cluster_42AB.260	75.389	0.63144	0.246959	2.55686	0.0105622	0.0299262	piRNA_cluster_42AB
Moonshiner	piRNA_cluster_42AB.47	28.496	1.14958	0.452097	2.54276	0.010998	0.0309766	piRNA_cluster_42AB
Moonshiner	piRNA_cluster_42AB.178	5.76525	-4.62456	1.8317	-2.52474	0.0115784	0.0324196	piRNA_cluster_42AB
Moonshiner	piRNA_cluster_80F.27	5.60037	-4.55678	1.82614	-2.4953	0.0125849	0.034828	piRNA_cluster_80F
Moonshiner	piRNA_cluster_flamenco.116	34.9966	0.963912	0.389984	2.47167	0.0134484	0.0370025	piRNA_cluster_flamenco
Moonshiner	piRNA_cluster_42AB.223	19.3815	-1.36296	0.554732	-2.45698	0.0140111	0.0383292	piRNA_cluster_42AB
Moonshiner	piRNA_cluster_42AB.23	12.8937	-1.60647	0.657811	-2.44215	0.0146	0.0397121	piRNA_cluster_42AB
Moonshiner	piRNA_cluster_flamenco.130	2.70136	4.77183	1.96276	2.43119	0.0150493	0.0407014	piRNA_cluster_flamenco
Moonshiner	piRNA_cluster_42AB.33	11.6912	-1.70917	0.708937	-2.4109	0.0159133	0.0427951	piRNA_cluster_42AB
Moonshiner	piRNA_cluster_flamenco.87	2.5067	4.66057	1.94235	2.39945	0.0164197	0.0439089	piRNA_cluster_flamenco
Moonshiner	piRNA_cluster_42AB.241	24.01	1.2027	0.502007	2.39579	0.0165845	0.0441018	piRNA_cluster_42AB
Moonshiner	piRNA_cluster_80F.3	86.5668	0.541954	0.230656	2.34962	0.0187924	0.0494208	piRNA_cluster_80F
Moonshiner	piRNA_cluster_42AB.65	4.80646	-4.34715	1.89299	-2.29644	0.0216508	0.0563156	piRNA_cluster_42AB
Moonshiner	piRNA_cluster_38C1.10	9.86713	1.85036	0.817365	2.26382	0.0235854	0.0606846	piRNA_cluster_38C1
Moonshiner	piRNA_cluster_42AB.240	29.769	0.991401	0.438896	2.25885	0.0238927	0.0611446	piRNA_cluster_42AB
Moonshiner	piRNA_cluster_42AB.2	415.166	-0.239868	0.106529	-2.25166	0.0243436	0.0619654	piRNA_cluster_42AB
Moonshiner	piRNA_cluster_42AB.195	22.5105	-1.15953	0.51859	-2.23594	0.025356	0.0637994	piRNA_cluster_42AB
Moonshiner	piRNA_cluster_38C1.19	18.5652	1.3074	0.58473	2.23591	0.0253577	0.0637994	piRNA_cluster_38C1
Moonshiner	piRNA_cluster_flamenco.6	94.3554	0.488641	0.218713	2.23416	0.0254724	0.0637994	piRNA_cluster_flamenco
Moonshiner	piRNA_cluster_flamenco.105	11.0757	1.64746	0.738286	2.23146	0.0256506	0.0637994	piRNA_cluster_flamenco
Moonshiner	piRNA_cluster_flamenco.37	26.4922	1.0507	0.471123	2.2302	0.0257342	0.0637994	piRNA_cluster_flamenco
Moonshiner	piRNA_cluster_flamenco.158	5.68223	3.25964	1.50778	2.16187	0.030628	0.0755384	piRNA_cluster_flamenco
Moonshiner	piRNA_cluster_42AB.221	12.048	-1.46958	0.683974	-2.14858	0.0316673	0.0773756	piRNA_cluster_42AB
Moonshiner	piRNA_cluster_42AB.9	15.0689	-1.31239	0.610926	-2.1482	0.031698	0.0773756	piRNA_cluster_42AB
Moonshiner	piRNA_cluster_38C2.73	15.065	1.34309	0.627823	2.13928	0.0324128	0.0787169	piRNA_cluster_38C2
Moonshiner	piRNA_cluster_42AB.175	4.03405	-4.07983	1.95541	-2.08643	0.0369401	0.0888055	piRNA_cluster_42AB
Moonshiner	piRNA_cluster_flamenco.5	61.9838	0.564379	0.27172	2.07706	0.037796	0.0904066	piRNA_cluster_flamenco
Moonshiner	piRNA_cluster_42AB.30	12.8778	-1.3322	0.654565	-2.03525	0.0418258	0.0995454	piRNA_cluster_42AB
Moonshiner	piRNA_cluster_42AB.192	20.6905	-1.09572	0.53967	-2.03035	0.0423215	0.100224	piRNA_cluster_42AB
Moonshiner	piRNA_cluster_38C2.47	18.758	1.21584	0.60064	2.02424	0.0429451	0.101197	piRNA_cluster_38C2
Moonshiner	piRNA_cluster_42AB.32	9.9121	-1.60155	0.793262	-2.01895	0.0434928	0.101983	piRNA_cluster_42AB
Moonshiner	piRNA_cluster_42AB.155	3.77437	-3.95007	1.96186	-2.01343	0.0440692	0.102828	piRNA_cluster_42AB
Moonshiner	piRNA_cluster_42AB.147	3.70327	-3.92554	1.96037	-2.00246	0.0452358	0.105035	piRNA_cluster_42AB
Moonshiner	piRNA_cluster_42AB.196	38.4234	-0.71297	0.364959	-1.95356	0.0507528	0.116151	piRNA_cluster_42AB
Moonshiner	piRNA_cluster_42AB.15	19.7676	-1.07187	0.548902	-1.95275	0.050849	0.116151	piRNA_cluster_42AB
Moonshiner	piRNA_cluster_flamenco.131	4.06333	3.80634	1.95048	1.95149	0.0509992	0.116151	piRNA_cluster_flamenco
Moonshiner	piRNA_cluster_42AB.244	9.18228	1.6851	0.864595	1.949	0.0512952	0.116269	piRNA_cluster_42AB
Moonshiner	piRNA_cluster_42AB.1	539.458	-0.183222	0.0947236	-1.93428	0.0530787	0.119742	piRNA_cluster_42AB
Moonshiner	piRNA_cluster_42AB.22	13.4039	-1.19657	0.633096	-1.89002	0.0587551	0.131922	piRNA_cluster_42AB
Moonshiner	piRNA_cluster_flamenco.39	28.4953	0.838572	0.445641	1.88172	0.0598738	0.133803	piRNA_cluster_flamenco
Moonshiner	piRNA_cluster_38C2.17	7.43155	-1.89192	1.01047	-1.87231	0.0611633	0.135413	piRNA_cluster_38C2
Moonshiner	piRNA_cluster_38C2.20	8.94723	-1.58195	0.846388	-1.86906	0.0616149	0.135781	piRNA_cluster_38C2
Moonshiner	piRNA_cluster_flamenco.161	4.64442	2.93039	1.59316	1.83936	0.0658627	0.144473	piRNA_cluster_flamenco
Moonshiner	piRNA_cluster_20A.31	49.9066	0.558873	0.310595	1.79936	0.0719617	0.155699	piRNA_cluster_20A
Moonshiner	piRNA_cluster_38C1.17	28.5696	0.821648	0.461285	1.78121	0.0748775	0.161275	piRNA_cluster_38C1
Moonshiner	piRNA_cluster_38C1.26	7.31858	1.83371	1.04749	1.75058	0.0800188	0.171572	piRNA_cluster_38C1
Moonshiner	piRNA_cluster_flamenco.117	6.04549	2.22887	1.28341	1.73668	0.0824437	0.175978	piRNA_cluster_flamenco
Moonshiner	piRNA_cluster_38C1.24	9.84768	1.39421	0.805816	1.73018	0.0835975	0.177645	piRNA_cluster_38C1
Moonshiner	piRNA_cluster_flamenco.9	25.9032	0.810017	0.470203	1.7227	0.0849437	0.179703	piRNA_cluster_flamenco
Moonshiner	piRNA_cluster_38C1.11	8.82895	2.5285	1.48453	1.70323	0.0885243	0.186449	piRNA_cluster_38C1
Moonshiner	piRNA_cluster_flamenco.102	22.016	0.872059	0.515081	1.69305	0.0904456	0.188825	piRNA_cluster_flamenco
Moonshiner	piRNA_cluster_38C2.13	5.99305	-2.08866	1.2428	-1.68061	0.0928396	0.192977	piRNA_cluster_38C2
Moonshiner	piRNA_cluster_42AB.144	3.62829	-5.44528	3.25956	-1.67055	0.0948098	0.196098	piRNA_cluster_42AB
Moonshiner	piRNA_cluster_20A.27	6.54503	1.94143	1.1634	1.66876	0.0951652	0.196098	piRNA_cluster_20A
Moonshiner	piRNA_cluster_flamenco.159	2.78787	3.20837	1.93804	1.65547	0.0978293	0.200141	piRNA_cluster_flamenco
Moonshiner	piRNA_cluster_flamenco.137	2.72118	3.20573	1.93725	1.65479	0.097968	0.200141	piRNA_cluster_flamenco
Moonshiner	piRNA_cluster_42AB.193	7.97574	-1.52102	0.926869	-1.64103	0.100791	0.204248	piRNA_cluster_42AB
Moonshiner	piRNA_cluster_20A.53	32.0994	0.66836	0.407697	1.63935	0.10114	0.204248	piRNA_cluster_20A
Moonshiner	piRNA_cluster_42AB.213	3.68345	-2.7937	1.70651	-1.63708	0.101613	0.204248	piRNA_cluster_42AB
Moonshiner	piRNA_cluster_80F.7	30.8071	-0.721888	0.441065	-1.63669	0.101695	0.204248	piRNA_cluster_80F
Moonshiner	piRNA_cluster_flamenco.118	3.95296	2.66461	1.63945	1.62531	0.104097	0.207974	piRNA_cluster_flamenco
Moonshiner	piRNA_cluster_42AB.181	6.61226	-2.01064	1.23825	-1.62378	0.104424	0.207974	piRNA_cluster_42AB
Moonshiner	piRNA_cluster_flamenco.2	15.1763	0.984866	0.613351	1.60571	0.108337	0.214749	piRNA_cluster_flamenco
Moonshiner	piRNA_cluster_42AB.222	16.0344	-0.961229	0.599512	-1.60335	0.108857	0.214749	piRNA_cluster_42AB
Moonshiner	piRNA_cluster_42AB.242	15.7744	0.966568	0.603391	1.60189	0.109179	0.214749	piRNA_cluster_42AB
Moonshiner	piRNA_cluster_38C2.72	24.104	0.821046	0.517687	1.58599	0.112742	0.220844	piRNA_cluster_38C2
Moonshiner	piRNA_cluster_42AB.206	25.4589	-0.75799	0.479139	-1.58198	0.113654	0.221718	piRNA_cluster_42AB
Moonshiner	piRNA_cluster_38C2.19	5.10046	-2.24077	1.42294	-1.57475	0.115315	0.22404	piRNA_cluster_38C2
Moonshiner	piRNA_cluster_38C1.27	5.59389	2.06976	1.31854	1.56973	0.116477	0.2244	piRNA_cluster_38C1
Moonshiner	piRNA_cluster_42AB.235	8.22001	-1.40123	0.893723	-1.56786	0.116914	0.2244	piRNA_cluster_42AB
Moonshiner	piRNA_cluster_flamenco.148	7.22535	-1.57474	1.01084	-1.55786	0.119266	0.227995	piRNA_cluster_flamenco
Moonshiner	piRNA_cluster_42AB.21	7.78937	-1.46889	0.95624	-1.53611	0.124512	0.23707	piRNA_cluster_42AB
Moonshiner	piRNA_cluster_38C2.78	11.0998	1.10031	0.72187	1.52425	0.127447	0.240515	piRNA_cluster_38C2
Moonshiner	piRNA_cluster_42AB.197	7.13497	-1.58477	1.04005	-1.52375	0.127572	0.240515	piRNA_cluster_42AB
Moonshiner	piRNA_cluster_flamenco.31	3.65083	2.53634	1.66915	1.51954	0.128625	0.241046	piRNA_cluster_flamenco
Moonshiner	piRNA_cluster_80F.8	95.159	0.341595	0.225698	1.5135	0.130152	0.242001	piRNA_cluster_80F
Moonshiner	piRNA_cluster_42AB.4	12.095	-0.983267	0.653757	-1.50403	0.132575	0.245547	piRNA_cluster_42AB
Moonshiner	piRNA_cluster_flamenco.160	6.1557	1.82514	1.22019	1.49578	0.134712	0.248387	piRNA_cluster_flamenco
Moonshiner	piRNA_cluster_42AB.20	10.2789	1.11588	0.746861	1.49409	0.135152	0.248387	piRNA_cluster_42AB
Moonshiner	piRNA_cluster_38C2.21	18.0659	0.848127	0.568958	1.49067	0.136049	0.249074	piRNA_cluster_38C2
Moonshiner	piRNA_cluster_flamenco.41	28.6461	0.665275	0.447988	1.48503	0.137537	0.25027	piRNA_cluster_flamenco
Moonshiner	piRNA_cluster_38C2.100	3.19221	-2.54956	1.71779	-1.48421	0.137753	0.25027	piRNA_cluster_38C2
Moonshiner	piRNA_cluster_42AB.207	35.9457	-0.551191	0.380152	-1.44992	0.14708	0.266197	piRNA_cluster_42AB
Moonshiner	piRNA_cluster_20A.17	104.306	0.306797	0.211966	1.44739	0.147788	0.266399	piRNA_cluster_20A
Moonshiner	piRNA_cluster_42AB.214	4.6996	-2.0359	1.43468	-1.41907	0.155879	0.278942	piRNA_cluster_42AB
Moonshiner	piRNA_cluster_42AB.7	8.31767	-1.24588	0.880382	-1.41515	0.157024	0.279937	piRNA_cluster_42AB
Moonshiner	piRNA_cluster_42AB.34	8.45105	-1.22608	0.881227	-1.39134	0.164124	0.291216	piRNA_cluster_42AB
Moonshiner	piRNA_cluster_38C1.29	4.3599	2.18839	1.57963	1.38538	0.165937	0.292542	piRNA_cluster_38C1
Moonshiner	piRNA_cluster_flamenco.40	37.178	0.517004	0.377837	1.36832	0.171211	0.299619	piRNA_cluster_flamenco
Moonshiner	piRNA_cluster_38C2.84	4.16745	2.07491	1.52163	1.36361	0.17269	0.301101	piRNA_cluster_38C2
Moonshiner	piRNA_cluster_flamenco.103	13.7574	0.856874	0.630452	1.35914	0.174101	0.302453	piRNA_cluster_flamenco
Moonshiner	piRNA_cluster_42AB.44	8.74831	-1.19936	0.884543	-1.35591	0.175128	0.303131	piRNA_cluster_42AB
Moonshiner	piRNA_cluster_38C2.79	8.92298	1.17166	0.870026	1.34669	0.178079	0.307122	piRNA_cluster_38C2
Moonshiner	piRNA_cluster_42AB.29	10.6372	-0.963913	0.720461	-1.33791	0.180925	0.310904	piRNA_cluster_42AB
Moonshiner	piRNA_cluster_flamenco.38	28.3682	0.582623	0.44592	1.30657	0.19136	0.326692	piRNA_cluster_flamenco
Moonshiner	piRNA_cluster_42AB.190	4.39473	-1.91639	1.46715	-1.3062	0.191486	0.326692	piRNA_cluster_42AB
Moonshiner	piRNA_cluster_flamenco.26	41.8012	0.439159	0.33769	1.30048	0.193437	0.328843	piRNA_cluster_flamenco
Moonshiner	piRNA_cluster_flamenco.106	16.0413	0.77075	0.596274	1.29261	0.196146	0.331083	piRNA_cluster_flamenco
Moonshiner	piRNA_cluster_80F.42	22.095	-0.655121	0.512996	-1.27705	0.201585	0.339062	piRNA_cluster_80F
Moonshiner	piRNA_cluster_80F.49	44.4781	0.411089	0.323073	1.27243	0.203219	0.340606	piRNA_cluster_80F
Moonshiner	piRNA_cluster_42AB.10	8.36895	-1.06379	0.858765	-1.23874	0.215442	0.358567	piRNA_cluster_42AB
Moonshiner	piRNA_cluster_38C2.14	4.09207	-1.81577	1.47768	-1.22879	0.219149	0.362187	piRNA_cluster_38C2
Moonshiner	piRNA_cluster_20A.8	6.13473	1.46653	1.2002	1.22191	0.221741	0.363961	piRNA_cluster_20A
Moonshiner	piRNA_cluster_flamenco.100	2.57004	1.91788	1.6219	1.18249	0.237012	0.38769	piRNA_cluster_flamenco
Moonshiner	piRNA_cluster_42AB.198	4.6842	-1.65482	1.40656	-1.1765	0.239394	0.390244	piRNA_cluster_42AB
Moonshiner	piRNA_cluster_38C2.81	4.47011	1.65651	1.42873	1.15942	0.246283	0.398744	piRNA_cluster_38C2
Moonshiner	piRNA_cluster_flamenco.212	10.1179	-0.836115	0.735404	-1.13695	0.25556	0.410969	piRNA_cluster_flamenco
Moonshiner	piRNA_cluster_20A.14	6.43299	1.27876	1.1287	1.13295	0.257237	0.412272	piRNA_cluster_20A
Moonshiner	piRNA_cluster_flamenco.114	3.49748	1.75531	1.55396	1.12958	0.258655	0.413154	piRNA_cluster_flamenco
Moonshiner	piRNA_cluster_38C1.25	8.20782	1.00644	0.898848	1.1197	0.262842	0.418437	piRNA_cluster_38C1
Moonshiner	piRNA_cluster_20A.34	13.3351	0.709468	0.634792	1.11764	0.263722	0.418438	piRNA_cluster_20A
Moonshiner	piRNA_cluster_80F.39	11.9435	-0.735818	0.662772	-1.11021	0.266907	0.422085	piRNA_cluster_80F
Moonshiner	piRNA_cluster_42AB.239	22.4906	0.544167	0.50294	1.08197	0.279265	0.439022	piRNA_cluster_42AB
Moonshiner	piRNA_cluster_flamenco.27	13.2093	0.669238	0.622547	1.075	0.282375	0.442139	piRNA_cluster_flamenco
Moonshiner	piRNA_cluster_38C2.1	5.00822	1.45328	1.35454	1.07289	0.283319	0.442164	piRNA_cluster_38C2
Moonshiner	piRNA_cluster_38C2.7	4.40082	-1.51079	1.41625	-1.06675	0.286083	0.445018	piRNA_cluster_38C2
Moonshiner	piRNA_cluster_38C1.28	5.65723	1.32566	1.24894	1.06143	0.288496	0.44731	piRNA_cluster_38C1
Moonshiner	piRNA_cluster_42AB.28	20.4019	-0.530943	0.525768	-1.00984	0.312571	0.47946	piRNA_cluster_42AB
Moonshiner	piRNA_cluster_42AB.5	17.896	-0.566311	0.561947	-1.00777	0.313567	0.47946	piRNA_cluster_42AB
Moonshiner	piRNA_cluster_38C2.71	6.24273	1.17987	1.17247	1.00631	0.314268	0.47946	piRNA_cluster_38C2
Moonshiner	piRNA_cluster_38C1.21	8.89152	0.819703	0.818344	1.00166	0.316508	0.479826	piRNA_cluster_38C1
Moonshiner	piRNA_cluster_38C1.16	20.2404	0.526262	0.532267	0.988718	0.322801	0.487788	piRNA_cluster_38C1
Moonshiner	piRNA_cluster_20A.1	4.74907	1.34981	1.37077	0.984709	0.324767	0.489206	piRNA_cluster_20A
Moonshiner	piRNA_cluster_flamenco.176	12.3701	0.625271	0.643793	0.97123	0.331434	0.496987	piRNA_cluster_flamenco
Moonshiner	piRNA_cluster_flamenco.149	6.62818	1.05868	1.09136	0.970051	0.332021	0.496987	piRNA_cluster_flamenco
Moonshiner	piRNA_cluster_42AB.247	3.04367	1.49066	1.55456	0.958893	0.337613	0.503773	piRNA_cluster_42AB
Moonshiner	piRNA_cluster_flamenco.165	3.08886	1.4793	1.5536	0.95218	0.341006	0.507246	piRNA_cluster_flamenco
Moonshiner	piRNA_cluster_flamenco.104	8.11134	0.831775	0.896324	0.927985	0.353415	0.522319	piRNA_cluster_flamenco
Moonshiner	piRNA_cluster_38C2.11	3.29596	-1.4015	1.51345	-0.926029	0.354431	0.522319	piRNA_cluster_38C2
Moonshiner	piRNA_cluster_38C2.18	6.72598	-1.04253	1.13613	-0.917618	0.358819	0.526676	piRNA_cluster_38C2
Moonshiner	piRNA_cluster_flamenco.153	9.46515	-0.709471	0.774424	-0.916128	0.3596	0.526676	piRNA_cluster_flamenco
Moonshiner	piRNA_cluster_20A.28	34.2937	0.351322	0.384953	0.912635	0.361434	0.527264	piRNA_cluster_20A
Moonshiner	piRNA_cluster_80F.2	8.65387	0.75896	0.832971	0.911148	0.362217	0.527264	piRNA_cluster_80F
Moonshiner	piRNA_cluster_20A.9	5.20121	1.17471	1.30447	0.900525	0.367841	0.533818	piRNA_cluster_20A
Moonshiner	piRNA_cluster_flamenco.7	91.9799	0.198095	0.221005	0.89634	0.370071	0.533849	piRNA_cluster_flamenco
Moonshiner	piRNA_cluster_flamenco.29	6.99312	0.92004	1.02892	0.894178	0.371227	0.533849	piRNA_cluster_flamenco
Moonshiner	piRNA_cluster_20A.18	336.501	0.104504	0.117975	0.885813	0.375719	0.538115	piRNA_cluster_20A
Moonshiner	piRNA_cluster_38C1.30	4.53512	1.23076	1.39156	0.884449	0.376454	0.538115	piRNA_cluster_38C1
Moonshiner	piRNA_cluster_42AB.3	282.895	-0.105912	0.127071	-0.83349	0.404568	0.57657	piRNA_cluster_42AB
Moonshiner	piRNA_cluster_42AB.45	6.01196	-0.973158	1.17762	-0.82638	0.408588	0.580561	piRNA_cluster_42AB
Moonshiner	piRNA_cluster_flamenco.163	3.58398	1.21765	1.49054	0.816919	0.413975	0.586465	piRNA_cluster_flamenco
Moonshiner	piRNA_cluster_20A.2	5.00875	1.07137	1.31569	0.814305	0.41547	0.586836	piRNA_cluster_20A
Moonshiner	piRNA_cluster_80F.50	451.21	-0.0838191	0.104115	-0.805063	0.420783	0.592582	piRNA_cluster_80F
Moonshiner	piRNA_cluster_flamenco.155	11.1146	0.520817	0.683875	0.761567	0.446318	0.61401	piRNA_cluster_flamenco
Moonshiner	piRNA_cluster_flamenco.107	12.9732	0.481485	0.634906	0.758356	0.448238	0.614874	piRNA_cluster_flamenco
Moonshiner	piRNA_cluster_80F.45	37.3983	-0.279903	0.372753	-0.750907	0.452709	0.619222	piRNA_cluster_80F
Moonshiner	piRNA_cluster_42AB.238	18.0724	0.433655	0.581393	0.745889	0.455734	0.621575	piRNA_cluster_42AB
Moonshiner	piRNA_cluster_38C2.74	20.4691	0.40662	0.558437	0.728139	0.466528	0.634479	piRNA_cluster_38C2
Moonshiner	piRNA_cluster_20A.6	2.68024	1.14675	1.60962	0.712433	0.476197	0.643953	piRNA_cluster_20A
Moonshiner	piRNA_cluster_38C2.8	2.75952	-1.06865	1.51078	-0.70735	0.479349	0.645912	piRNA_cluster_38C2
Moonshiner	piRNA_cluster_42AB.202	4.05684	-1.01012	1.43134	-0.705718	0.480363	0.645912	piRNA_cluster_42AB
Moonshiner	piRNA_cluster_20A.19	195.262	0.108122	0.154436	0.700107	0.48386	0.646959	piRNA_cluster_20A
Moonshiner	piRNA_cluster_flamenco.113	6.47483	0.751649	1.09385	0.687157	0.491984	0.655973	piRNA_cluster_flamenco
Moonshiner	piRNA_cluster_20A.13	5.36904	-0.907195	1.33194	-0.681106	0.495804	0.65739	piRNA_cluster_20A
Moonshiner	piRNA_cluster_flamenco.25	69.415	-0.171256	0.254683	-0.672427	0.501312	0.661009	piRNA_cluster_flamenco
Moonshiner	piRNA_cluster_42AB.258	4.48307	-0.9067	1.3859	-0.65423	0.512964	0.667644	piRNA_cluster_42AB
Moonshiner	piRNA_cluster_20A.21	2239	-0.0353352	0.0540608	-0.65362	0.513357	0.667644	piRNA_cluster_20A
Moonshiner	piRNA_cluster_flamenco.36	9.75873	0.484667	0.757763	0.639602	0.522431	0.675517	piRNA_cluster_flamenco
Moonshiner	piRNA_cluster_42AB.25	3.5766	-1.0307	1.61471	-0.638318	0.523267	0.675517	piRNA_cluster_42AB
Moonshiner	piRNA_cluster_80F.6	17.6634	-0.358955	0.563843	-0.636623	0.52437	0.675517	piRNA_cluster_80F
Moonshiner	piRNA_cluster_20A.7	6.10843	-0.737282	1.16573	-0.632462	0.527085	0.67626	piRNA_cluster_20A
Moonshiner	piRNA_cluster_42AB.27	7.94091	0.559614	0.890101	0.628709	0.52954	0.677316	piRNA_cluster_42AB
Moonshiner	piRNA_cluster_20A.4	3.86295	0.913706	1.4576	0.626856	0.530754	0.677316	piRNA_cluster_20A
Moonshiner	piRNA_cluster_42AB.227	14.165	-0.381419	0.611366	-0.623881	0.532706	0.677772	piRNA_cluster_42AB
Moonshiner	piRNA_cluster_flamenco.4	73.1622	0.154167	0.247867	0.621974	0.533959	0.677772	piRNA_cluster_flamenco
Moonshiner	piRNA_cluster_80F.9	40.5522	-0.207776	0.342247	-0.607093	0.543789	0.682664	piRNA_cluster_80F
Moonshiner	piRNA_cluster_38C1.2	3.23094	-0.910717	1.50257	-0.606106	0.544445	0.682664	piRNA_cluster_38C1
Moonshiner	piRNA_cluster_38C2.4	3.08277	0.96949	1.60168	0.605294	0.544983	0.682664	piRNA_cluster_38C2
Moonshiner	piRNA_cluster_flamenco.157	3.08719	0.905562	1.50479	0.601788	0.547315	0.683785	piRNA_cluster_flamenco
Moonshiner	piRNA_cluster_flamenco.1	37.5884	0.217985	0.377503	0.577441	0.563642	0.696866	piRNA_cluster_flamenco
Moonshiner	piRNA_cluster_20A.24	268.591	0.0751769	0.131529	0.571561	0.567619	0.699632	piRNA_cluster_20A
Moonshiner	piRNA_cluster_flamenco.108	17.0324	0.323712	0.576414	0.561597	0.574391	0.704665	piRNA_cluster_flamenco
Moonshiner	piRNA_cluster_38C1.5	6.03292	-0.681187	1.22882	-0.554344	0.579344	0.708914	piRNA_cluster_38C1
Moonshiner	piRNA_cluster_42AB.234	5.24175	-0.679068	1.27044	-0.534512	0.592987	0.723632	piRNA_cluster_42AB
Moonshiner	piRNA_cluster_38C1.6	5.22026	-0.690529	1.29688	-0.532453	0.594412	0.723632	piRNA_cluster_38C1
Moonshiner	piRNA_cluster_42AB.43	10.011	-0.38724	0.737157	-0.525316	0.599364	0.725947	piRNA_cluster_42AB
Moonshiner	piRNA_cluster_20A.11	9.42551	-0.400088	0.765508	-0.522644	0.601222	0.72635	piRNA_cluster_20A
Moonshiner	piRNA_cluster_38C2.75	18.7071	-0.282188	0.551142	-0.512007	0.608646	0.731364	piRNA_cluster_38C2
Moonshiner	piRNA_cluster_38C2.85	6.27499	-0.575272	1.12776	-0.510099	0.609982	0.731364	piRNA_cluster_38C2
Moonshiner	piRNA_cluster_flamenco.152	4.8317	0.677775	1.3469	0.503209	0.614817	0.735309	piRNA_cluster_flamenco
Moonshiner	piRNA_cluster_38C1.3	2.97347	-0.722256	1.49375	-0.483519	0.628728	0.744463	piRNA_cluster_38C1
Moonshiner	piRNA_cluster_42AB.42	19.7845	-0.253884	0.531646	-0.477544	0.632975	0.747633	piRNA_cluster_42AB
Moonshiner	piRNA_cluster_42AB.205	20.7274	-0.245777	0.520022	-0.472628	0.636479	0.749911	piRNA_cluster_42AB
Moonshiner	piRNA_cluster_42AB.26	3.5182	-0.690221	1.46948	-0.469705	0.638566	0.750512	piRNA_cluster_42AB
Moonshiner	piRNA_cluster_20A.12	8.58793	-0.399676	0.866591	-0.461205	0.644652	0.755798	piRNA_cluster_20A
Moonshiner	piRNA_cluster_flamenco.8	88.8269	0.101258	0.225284	0.449469	0.653094	0.763815	piRNA_cluster_flamenco
Moonshiner	piRNA_cluster_80F.1	3.97034	-0.651534	1.47109	-0.442892	0.657844	0.767484	piRNA_cluster_80F
Moonshiner	piRNA_cluster_20A.16	9.15005	0.353421	0.803843	0.439664	0.66018	0.768327	piRNA_cluster_20A
Moonshiner	piRNA_cluster_38C2.98	3.96592	-0.600852	1.42209	-0.422512	0.672651	0.777256	piRNA_cluster_38C2
Moonshiner	piRNA_cluster_38C2.12	3.94222	-0.589777	1.44787	-0.40734	0.683758	0.784262	piRNA_cluster_38C2
Moonshiner	piRNA_cluster_42AB.203	2.67636	0.567172	1.48352	0.382315	0.702228	0.803511	piRNA_cluster_42AB
Moonshiner	piRNA_cluster_42AB.18	4.8465	-0.545668	1.4381	-0.379436	0.704364	0.804022	piRNA_cluster_42AB
Moonshiner	piRNA_cluster_38C2.49	5.04839	0.452003	1.295	0.349037	0.727061	0.824697	piRNA_cluster_38C2
Moonshiner	piRNA_cluster_flamenco.3	45.4057	0.11059	0.318015	0.34775	0.728028	0.824697	piRNA_cluster_flamenco
Moonshiner	piRNA_cluster_38C2.77	7.22575	0.340516	0.983019	0.346398	0.729043	0.824697	piRNA_cluster_38C2
Moonshiner	piRNA_cluster_38C1.4	5.07209	0.440801	1.28726	0.342434	0.732024	0.824697	piRNA_cluster_38C1
Moonshiner	piRNA_cluster_20A.3	2.7612	-0.50194	1.47551	-0.34018	0.733721	0.824697	piRNA_cluster_20A
Moonshiner	piRNA_cluster_20A.20	1184.18	0.0241437	0.0712189	0.339007	0.734604	0.824697	piRNA_cluster_20A
Moonshiner	piRNA_cluster_42AB.225	14.2981	0.204362	0.608903	0.335623	0.737155	0.825614	piRNA_cluster_42AB
Moonshiner	piRNA_cluster_80F.47	26.9656	-0.15193	0.463677	-0.327664	0.743166	0.826726	piRNA_cluster_80F
Moonshiner	piRNA_cluster_42AB.8	6.23588	-0.366501	1.1194	-0.327409	0.743358	0.826726	piRNA_cluster_42AB
Moonshiner	piRNA_cluster_38C2.5	3.88718	0.464652	1.43869	0.322969	0.746718	0.828527	piRNA_cluster_38C2
Moonshiner	piRNA_cluster_38C2.2	5.61241	0.385373	1.21401	0.317438	0.750911	0.829313	piRNA_cluster_38C2
Moonshiner	piRNA_cluster_flamenco.150	4.29617	-0.420797	1.39979	-0.300613	0.76371	0.841495	piRNA_cluster_flamenco
Moonshiner	piRNA_cluster_80F.43	723.123	-0.0229521	0.0835365	-0.274755	0.783505	0.857352	piRNA_cluster_80F
Moonshiner	piRNA_cluster_38C2.34	11.5357	-0.17788	0.668725	-0.265998	0.790241	0.860766	piRNA_cluster_38C2
Moonshiner	piRNA_cluster_80F.46	30.9836	0.0884856	0.416977	0.212207	0.831945	0.895225	piRNA_cluster_80F
Moonshiner	piRNA_cluster_38C2.15	5.90951	-0.247955	1.16981	-0.211961	0.832137	0.895225	piRNA_cluster_38C2
Moonshiner	piRNA_cluster_20A.10	4.98816	-0.276976	1.31487	-0.210649	0.833162	0.895225	piRNA_cluster_20A
Moonshiner	piRNA_cluster_80F.44	706.537	-0.0170177	0.0856961	-0.198582	0.84259	0.899293	piRNA_cluster_80F
Moonshiner	piRNA_cluster_38C2.96	4.98596	-0.256882	1.29487	-0.198385	0.842744	0.899293	piRNA_cluster_38C2
Moonshiner	piRNA_cluster_38C2.80	6.38649	0.214744	1.103	0.19469	0.845635	0.899293	piRNA_cluster_38C2
Moonshiner	piRNA_cluster_20A.5	4.51233	-0.257524	1.36617	-0.188501	0.850484	0.901626	piRNA_cluster_20A
Moonshiner	piRNA_cluster_42AB.226	11.7596	0.115453	0.652181	0.177026	0.859488	0.905124	piRNA_cluster_42AB
Moonshiner	piRNA_cluster_20A.60	9.49403	0.114632	0.767358	0.149385	0.88125	0.925993	piRNA_cluster_20A
Moonshiner	piRNA_cluster_38C2.95	3.40526	0.210803	1.50588	0.139987	0.888671	0.93002	piRNA_cluster_38C2
Moonshiner	piRNA_cluster_20A.59	7.40485	0.133019	0.952973	0.139583	0.888989	0.93002	piRNA_cluster_20A
Moonshiner	piRNA_cluster_38C2.16	5.1134	0.164087	1.27455	0.128741	0.897562	0.936929	piRNA_cluster_38C2
Moonshiner	piRNA_cluster_42AB.200	3.43116	0.167851	1.45142	0.115646	0.907933	0.945681	piRNA_cluster_42AB
Moonshiner	piRNA_cluster_42AB.237	5.63222	0.12725	1.2047	0.105627	0.915878	0.948478	piRNA_cluster_42AB
Moonshiner	piRNA_cluster_38C1.14	3.45486	0.153283	1.46371	0.104723	0.916596	0.948478	piRNA_cluster_38C1
Moonshiner	piRNA_cluster_20A.15	10.6915	-0.0714049	0.736448	-0.0969584	0.922759	0.952784	piRNA_cluster_20A
Moonshiner	piRNA_cluster_42AB.6	10.0371	-0.0626851	0.757816	-0.0827181	0.934076	0.962381	piRNA_cluster_42AB
Moonshiner	piRNA_cluster_20A.58	10.573	-0.0512276	0.701718	-0.0730031	0.941804	0.968247	piRNA_cluster_20A
Moonshiner	piRNA_cluster_42AB.19	10.5019	-0.0398732	0.713195	-0.0559078	0.955415	0.978147	piRNA_cluster_42AB
Moonshiner	piRNA_cluster_38C2.6	3.9307	0.0780856	1.44412	0.0540715	0.956878	0.978147	piRNA_cluster_38C2
Moonshiner	piRNA_cluster_flamenco.151	9.67313	-0.0401064	0.766983	-0.0522911	0.958297	0.978147	piRNA_cluster_flamenco
Moonshiner	piRNA_cluster_flamenco.24	3.64565	-0.0738245	1.45927	-0.05059	0.959652	0.978147	piRNA_cluster_flamenco
Moonshiner	piRNA_cluster_42AB.199	2.67248	0.0400626	1.49127	0.0268648	0.978568	0.987878	piRNA_cluster_42AB
Moonshiner	piRNA_cluster_80F.48	29.4744	-0.0102623	0.424926	-0.0241509	0.980732	0.987878	piRNA_cluster_80F
Moonshiner	piRNA_cluster_42AB.201	6.4989	-0.0254745	1.1077	-0.0229977	0.981652	0.987878	piRNA_cluster_42AB
Moonshiner	piRNA_cluster_flamenco.154	14.0686	0.0105251	0.599994	0.0175419	0.986004	0.990165	piRNA_cluster_flamenco
Moonshiner	piRNA_cluster_42AB.208	42.0102	0.00434362	0.332787	0.0130523	0.989586	0.990581	piRNA_cluster_42AB
Moonshiner	piRNA_cluster_42AB.228	3.16981	-0.0173555	1.4701	-0.0118056	0.990581	0.990581	piRNA_cluster_42AB
Rhino_2	piRNA_cluster_42AB.251	480.634	5.70343	0.248466	22.9546	1.3255e-116	5.46108e-114	piRNA_cluster_42AB
Rhino_2	piRNA_cluster_42AB.252	179.904	4.98234	0.33399	14.9176	2.53184e-50	5.21559e-48	piRNA_cluster_42AB
Rhino_2	piRNA_cluster_42AB.250	169.057	4.43016	0.304574	14.5454	6.24391e-48	8.57497e-46	piRNA_cluster_42AB
Rhino_2	piRNA_cluster_20A.25	330.207	1.86727	0.150699	12.3907	2.93377e-35	3.02178e-33	piRNA_cluster_20A
Rhino_2	piRNA_cluster_80F.4	130.799	3.67255	0.297118	12.3606	4.27206e-35	3.52017e-33	piRNA_cluster_80F
Rhino_2	piRNA_cluster_20A.26	265.025	2.1081	0.171784	12.2718	1.28384e-34	8.81568e-33	piRNA_cluster_20A
Rhino_2	piRNA_cluster_80F.5	107.736	3.98565	0.345807	11.5256	9.79748e-31	5.76652e-29	piRNA_cluster_80F
Rhino_2	piRNA_cluster_42AB.259	105.909	3.75783	0.332857	11.2896	1.47639e-29	7.60342e-28	piRNA_cluster_42AB
Rhino_2	piRNA_cluster_20A.56	736.819	1.06371	0.0988482	10.761	5.25924e-27	2.40756e-25	piRNA_cluster_20A
Rhino_2	piRNA_cluster_20A.32	147.518	2.09166	0.223877	9.34289	9.3739e-21	3.51095e-19	piRNA_cluster_20A
Rhino_2	piRNA_cluster_42AB.47	74.4747	3.20619	0.359888	8.90886	5.15587e-19	1.77018e-17	piRNA_cluster_42AB
Rhino_2	piRNA_cluster_20A.22	1366.93	0.51845	0.0718917	7.21155	5.53205e-13	1.628e-11	piRNA_cluster_20A
Rhino_2	piRNA_cluster_20A.54	428.049	0.909276	0.129009	7.04818	1.81278e-12	4.97911e-11	piRNA_cluster_20A
Rhino_2	piRNA_cluster_20A.55	263.814	1.01305	0.159633	6.34614	2.20791e-10	5.68537e-09	piRNA_cluster_20A
Rhino_2	piRNA_cluster_42AB.74	51.038	-6.4811	1.06658	-6.07653	1.22813e-09	2.97641e-08	piRNA_cluster_42AB
Rhino_2	piRNA_cluster_20A.24	306.493	0.889679	0.147924	6.01444	1.80504e-09	4.13155e-08	piRNA_cluster_20A
Rhino_2	piRNA_cluster_42AB.87	31.6797	-4.42311	0.754259	-5.86418	4.51363e-09	9.78744e-08	piRNA_cluster_42AB
Rhino_2	piRNA_cluster_42AB.73	40.1339	-8.591	1.48454	-5.78697	7.16681e-09	1.47636e-07	piRNA_cluster_42AB
Rhino_2	piRNA_cluster_42AB.88	41.1725	-6.16697	1.07615	-5.73058	1.00085e-08	1.96357e-07	piRNA_cluster_42AB
Rhino_2	piRNA_cluster_42AB.71	28.853	-8.11518	1.50148	-5.40479	6.48843e-08	1.18859e-06	piRNA_cluster_42AB
Rhino_2	piRNA_cluster_42AB.76	28.833	-8.11434	1.50244	-5.40078	6.63532e-08	1.18859e-06	piRNA_cluster_42AB
Rhino_2	piRNA_cluster_20A.23	671.209	0.529195	0.0992598	5.33141	9.74513e-08	1.67291e-06	piRNA_cluster_20A
Rhino_2	piRNA_cluster_38C1.7	28.0811	3.01698	0.571466	5.27937	1.29627e-07	2.13626e-06	piRNA_cluster_38C1
Rhino_2	piRNA_cluster_42AB.89	54.7452	-7.59089	1.45422	-5.2199	1.79024e-07	2.83683e-06	piRNA_cluster_42AB
Rhino_2	piRNA_cluster_42AB.52	22.7277	-7.77047	1.51534	-5.12789	2.93014e-07	4.31149e-06	piRNA_cluster_42AB
Rhino_2	piRNA_cluster_42AB.78	28.7233	-5.63201	1.10582	-5.09305	3.5234e-07	5.00566e-06	piRNA_cluster_42AB
Rhino_2	piRNA_cluster_42AB.75	35.2815	-2.64709	0.528103	-5.01246	5.37398e-07	7.38026e-06	piRNA_cluster_42AB
Rhino_2	piRNA_cluster_20A.28	54.7559	1.777	0.356874	4.97935	6.37989e-07	8.47908e-06	piRNA_cluster_20A
Rhino_2	piRNA_cluster_80F.20	22.1242	-4.21424	0.858161	-4.91078	9.0716e-07	1.16797e-05	piRNA_cluster_80F
Rhino_2	piRNA_cluster_80F.23	18.7415	-7.49245	1.53074	-4.89466	9.84747e-07	1.22944e-05	piRNA_cluster_80F
Rhino_2	piRNA_cluster_42AB.69	18.5556	-7.4776	1.53123	-4.88338	1.04281e-06	1.26364e-05	piRNA_cluster_42AB
Rhino_2	piRNA_cluster_20A.34	29.3971	2.59408	0.53578	4.84168	1.28744e-06	1.51551e-05	piRNA_cluster_20A
Rhino_2	piRNA_cluster_42AB.86	23.901	-5.37633	1.11857	-4.80642	1.53657e-06	1.75852e-05	piRNA_cluster_42AB
Rhino_2	piRNA_cluster_42AB.67	15.2471	-7.1942	1.54999	-4.64146	3.45954e-06	3.75087e-05	piRNA_cluster_42AB
Rhino_2	piRNA_cluster_38C2.35	12.8	7.29764	1.57496	4.63354	3.5946e-06	3.79737e-05	piRNA_cluster_38C2
Rhino_2	piRNA_cluster_42AB.72	23.0125	-3.01843	0.665443	-4.53597	5.73401e-06	5.90603e-05	piRNA_cluster_42AB
Rhino_2	piRNA_cluster_flamenco.135	11.1621	7.09837	1.59767	4.44296	8.87278e-06	8.91606e-05	piRNA_cluster_flamenco
Rhino_2	piRNA_cluster_42AB.70	12.1145	-6.86319	1.57785	-4.34972	1.36311e-05	0.000133714	piRNA_cluster_42AB
Rhino_2	piRNA_cluster_42AB.90	24.5468	-6.42555	1.49098	-4.30962	1.63538e-05	0.000156692	piRNA_cluster_42AB
Rhino_2	piRNA_cluster_42AB.77	17.2752	-4.88654	1.15316	-4.23753	2.25995e-05	0.000211613	piRNA_cluster_42AB
Rhino_2	piRNA_cluster_80F.33	11.3509	-6.76688	1.60002	-4.22924	2.34486e-05	0.000214685	piRNA_cluster_80F
Rhino_2	piRNA_cluster_38C2.94	34.971	1.92692	0.464727	4.14635	3.37823e-05	0.000302572	piRNA_cluster_38C2
Rhino_2	piRNA_cluster_flamenco.116	41.426	1.70764	0.414191	4.12284	3.74231e-05	0.000328049	piRNA_cluster_flamenco
Rhino_2	piRNA_cluster_80F.30	15.7939	-4.75165	1.15892	-4.10007	4.13032e-05	0.00035217	piRNA_cluster_80F
Rhino_2	piRNA_cluster_80F.22	9.92552	-6.57533	1.60511	-4.09649	4.19459e-05	0.00035217	piRNA_cluster_80F
Rhino_2	piRNA_cluster_42AB.183	17.6465	-3.22238	0.787454	-4.09215	4.27391e-05	0.00035217	piRNA_cluster_42AB
Rhino_2	piRNA_cluster_42AB.68	20.1688	-6.13853	1.50577	-4.07668	4.56834e-05	0.00036391	piRNA_cluster_42AB
Rhino_2	piRNA_cluster_80F.43	693.689	0.398193	0.0983296	4.04958	5.13102e-05	0.000398864	piRNA_cluster_80F
Rhino_2	piRNA_cluster_42AB.50	14.9422	-4.06114	1.00851	-4.02686	5.65268e-05	0.000431278	piRNA_cluster_42AB
Rhino_2	piRNA_cluster_20A.33	8.07806	6.63973	1.65301	4.01676	5.90044e-05	0.000441997	piRNA_cluster_20A
Rhino_2	piRNA_cluster_20A.40	7.99779	6.61797	1.65186	4.00638	6.16556e-05	0.000453609	piRNA_cluster_20A
Rhino_2	piRNA_cluster_42AB.205	9.24782	-6.47373	1.61792	-4.00127	6.30035e-05	0.000455394	piRNA_cluster_42AB
Rhino_2	piRNA_cluster_80F.21	9.05192	-6.44218	1.61985	-3.97703	6.97805e-05	0.000495682	piRNA_cluster_80F
Rhino_2	piRNA_cluster_80F.36	14.7488	-4.01563	1.02082	-3.93373	8.36377e-05	0.000584046	piRNA_cluster_80F
Rhino_2	piRNA_cluster_80F.14	17.3121	-5.91501	1.51982	-3.89191	9.94573e-05	0.00068294	piRNA_cluster_80F
Rhino_2	piRNA_cluster_42AB.57	8.42422	-6.3375	1.63612	-3.87349	0.000107287	0.00072463	piRNA_cluster_42AB
Rhino_2	piRNA_cluster_42AB.66	8.13831	-6.28959	1.64195	-3.83056	0.000127853	0.000849602	piRNA_cluster_42AB
Rhino_2	piRNA_cluster_42AB.51	14.0811	-3.94375	1.03079	-3.82593	0.000130281	0.000851996	piRNA_cluster_42AB
Rhino_2	piRNA_cluster_42AB.220	18.727	-2.66279	0.699626	-3.80602	0.000141222	0.000909115	piRNA_cluster_42AB
Rhino_2	piRNA_cluster_80F.31	13.3809	-3.89271	1.02887	-3.78348	0.00015465	0.000980244	piRNA_cluster_80F
Rhino_2	piRNA_cluster_42AB.246	14.2142	-3.50557	0.939749	-3.73033	0.000191233	0.0011798	piRNA_cluster_42AB
Rhino_2	piRNA_cluster_42AB.55	7.53061	-6.17594	1.65597	-3.7295	0.00019186	0.0011798	piRNA_cluster_42AB
Rhino_2	piRNA_cluster_42AB.1	547.314	0.404651	0.109234	3.70445	0.000211846	0.00128354	piRNA_cluster_42AB
Rhino_2	piRNA_cluster_42AB.180	14.502	-3.19182	0.869677	-3.67012	0.000242432	0.00144757	piRNA_cluster_42AB
Rhino_2	piRNA_cluster_42AB.174	12.2583	-4.38534	1.20429	-3.64144	0.000271113	0.0015957	piRNA_cluster_42AB
Rhino_2	piRNA_cluster_80F.32	13.9136	-5.59607	1.54283	-3.62715	0.000286566	0.00166289	piRNA_cluster_80F
Rhino_2	piRNA_cluster_80F.35	13.739	-5.56825	1.54188	-3.61134	0.000304623	0.00174312	piRNA_cluster_80F
Rhino_2	piRNA_cluster_80F.37	13.719	-5.56641	1.54394	-3.60534	0.000311749	0.00175946	piRNA_cluster_80F
Rhino_2	piRNA_cluster_42AB.185	14.7085	-2.93896	0.81824	-3.5918	0.000328402	0.0018284	piRNA_cluster_42AB
Rhino_2	piRNA_cluster_42AB.60	11.8365	-4.33253	1.2132	-3.57115	0.000355422	0.00195245	piRNA_cluster_42AB
Rhino_2	piRNA_cluster_80F.44	664.21	0.353632	0.0992345	3.5636	0.000365803	0.00198304	piRNA_cluster_80F
Rhino_2	piRNA_cluster_42AB.59	12.8654	-5.47095	1.54905	-3.53181	0.000412725	0.00220835	piRNA_cluster_42AB
Rhino_2	piRNA_cluster_20A.21	2008.51	0.212995	0.0607132	3.50821	0.000451128	0.00238288	piRNA_cluster_20A
Rhino_2	piRNA_cluster_flamenco.127	5.43154	6.05949	1.74229	3.4779	0.000505368	0.00263559	piRNA_cluster_flamenco
Rhino_2	piRNA_cluster_80F.24	12.2377	-5.39615	1.55512	-3.46993	0.000520596	0.00268107	piRNA_cluster_80F
Rhino_2	piRNA_cluster_flamenco.140	5.19501	5.99267	1.76559	3.39415	0.00068842	0.00345889	piRNA_cluster_flamenco
Rhino_2	piRNA_cluster_42AB.176	5.73341	-5.78364	1.71583	-3.37076	0.000749614	0.00372097	piRNA_cluster_42AB
Rhino_2	piRNA_cluster_42AB.224	20.6423	-2.09645	0.626404	-3.3468	0.000817499	0.00396247	piRNA_cluster_42AB
Rhino_2	piRNA_cluster_42AB.206	15.42	-2.55106	0.764584	-3.33653	0.000848324	0.00406407	piRNA_cluster_42AB
Rhino_2	piRNA_cluster_42AB.194	26.8958	-1.74731	0.526335	-3.31977	0.000900908	0.0042189	piRNA_cluster_42AB
Rhino_2	piRNA_cluster_38C2.20	5.51751	-5.72806	1.72547	-3.31971	0.000901125	0.0042189	piRNA_cluster_38C2
Rhino_2	piRNA_cluster_38C2.24	5.50751	-5.72589	1.72698	-3.31554	0.000914654	0.00423346	piRNA_cluster_38C2
Rhino_2	piRNA_cluster_42AB.110	44.4406	1.29774	0.393838	3.29511	0.00098383	0.00445427	piRNA_cluster_42AB
Rhino_2	piRNA_cluster_20A.31	53.2687	1.14692	0.349849	3.27834	0.00104421	0.00467625	piRNA_cluster_20A
Rhino_2	piRNA_cluster_flamenco.138	4.53445	5.80159	1.79146	3.23848	0.00120169	0.00532361	piRNA_cluster_flamenco
Rhino_2	piRNA_cluster_20A.27	10.3212	3.06242	0.950358	3.22238	0.0012713	0.00557208	piRNA_cluster_20A
Rhino_2	piRNA_cluster_flamenco.134	4.32918	5.72961	1.82152	3.14551	0.00165799	0.00704219	piRNA_cluster_flamenco
Rhino_2	piRNA_cluster_42AB.143	4.83981	-5.53977	1.76482	-3.139	0.00169526	0.00712701	piRNA_cluster_42AB
Rhino_2	piRNA_cluster_38C2.17	4.82981	-5.53727	1.76966	-3.12901	0.00175397	0.00729936	piRNA_cluster_38C2
Rhino_2	piRNA_cluster_80F.29	9.16505	-4.96507	1.59958	-3.10398	0.00190934	0.00778859	piRNA_cluster_80F
Rhino_2	piRNA_cluster_20A.57	57.191	1.05389	0.340355	3.09645	0.00195852	0.00791089	piRNA_cluster_20A
Rhino_2	piRNA_cluster_38C1.17	8.97977	-3.91482	1.27578	-3.06858	0.0021508	0.00860318	piRNA_cluster_38C1
Rhino_2	piRNA_cluster_80F.15	9.4647	-3.35268	1.09584	-3.05945	0.00221742	0.00878438	piRNA_cluster_80F
Rhino_2	piRNA_cluster_42AB.178	4.59391	-5.46581	1.79696	-3.04169	0.00235254	0.0092309	piRNA_cluster_42AB
Rhino_2	piRNA_cluster_42AB.58	8.62199	-4.8898	1.61201	-3.03336	0.00241845	0.00940002	piRNA_cluster_42AB
Rhino_2	piRNA_cluster_80F.27	4.40801	-5.4045	1.79132	-3.01705	0.00255245	0.00982811	piRNA_cluster_80F
Rhino_2	piRNA_cluster_38C1.19	4.39801	-5.40177	1.79489	-3.00953	0.00261649	0.00998144	piRNA_cluster_38C1
Rhino_2	piRNA_cluster_38C2.48	7.31598	3.94683	1.32222	2.98501	0.00283568	0.0107183	piRNA_cluster_38C2
Rhino_2	piRNA_cluster_42AB.187	18.8242	-1.89859	0.637525	-2.97806	0.00290081	0.0108649	piRNA_cluster_42AB
Rhino_2	piRNA_cluster_42AB.258	13.8313	2.24173	0.754059	2.97288	0.00295018	0.0109502	piRNA_cluster_42AB
Rhino_2	piRNA_cluster_flamenco.136	3.69987	5.50689	1.86367	2.95486	0.00312811	0.011507	piRNA_cluster_flamenco
Rhino_2	piRNA_cluster_42AB.46	6.93382	4.92593	1.66873	2.95191	0.0031581	0.0115145	piRNA_cluster_42AB
Rhino_2	piRNA_cluster_42AB.188	8.32457	-3.75605	1.27451	-2.94705	0.00320823	0.0115946	piRNA_cluster_42AB
Rhino_2	piRNA_cluster_80F.34	8.24332	-3.76473	1.28186	-2.93694	0.00331471	0.0118717	piRNA_cluster_80F
Rhino_2	piRNA_cluster_38C1.9	4.17211	-5.32603	1.81507	-2.93435	0.00334251	0.0118717	piRNA_cluster_38C1
Rhino_2	piRNA_cluster_80F.50	436.197	0.362968	0.124563	2.91394	0.00356898	0.0124612	piRNA_cluster_80F
Rhino_2	piRNA_cluster_42AB.219	16.6761	-1.95838	0.678984	-2.88429	0.00392303	0.0135822	piRNA_cluster_42AB
Rhino_2	piRNA_cluster_42AB.3	283.291	0.436338	0.153149	2.8491	0.00438425	0.0150526	piRNA_cluster_42AB
Rhino_2	piRNA_cluster_80F.25	8.6111	-3.20193	1.12833	-2.83775	0.00454329	0.0154697	piRNA_cluster_80F
Rhino_2	piRNA_cluster_42AB.184	11.2141	-2.48635	0.877254	-2.83424	0.00459343	0.0155122	piRNA_cluster_42AB
Rhino_2	piRNA_cluster_42AB.65	3.76031	-5.17435	1.84559	-2.80363	0.00505311	0.0169259	piRNA_cluster_42AB
Rhino_2	piRNA_cluster_42AB.208	22.982	-1.5939	0.570047	-2.79609	0.00517256	0.0171398	piRNA_cluster_42AB
Rhino_2	piRNA_cluster_38C2.18	3.74031	-5.16795	1.84942	-2.79436	0.0052002	0.0171398	piRNA_cluster_38C2
Rhino_2	piRNA_cluster_38C1.16	7.12194	-4.58783	1.64452	-2.78977	0.00527454	0.0172469	piRNA_cluster_38C1
Rhino_2	piRNA_cluster_38C2.72	7.72687	-3.6352	1.31475	-2.76494	0.00569329	0.0184696	piRNA_cluster_38C2
Rhino_2	piRNA_cluster_42AB.177	9.10603	-2.81626	1.02102	-2.75828	0.00581067	0.0187031	piRNA_cluster_42AB
Rhino_2	piRNA_cluster_42AB.218	27.516	-1.38562	0.503572	-2.75158	0.00593077	0.0188899	piRNA_cluster_42AB
Rhino_2	piRNA_cluster_80F.28	7.36972	-3.59026	1.30557	-2.74995	0.00596041	0.0188899	piRNA_cluster_80F
Rhino_2	piRNA_cluster_flamenco.139	5.85271	4.67697	1.70468	2.74361	0.00607673	0.0191116	piRNA_cluster_flamenco
Rhino_2	piRNA_cluster_38C2.22	8.0993	-3.1063	1.13416	-2.73885	0.00616543	0.0192436	piRNA_cluster_38C2
Rhino_2	piRNA_cluster_flamenco.129	6.86132	3.2312	1.18527	2.72613	0.00640814	0.0197901	piRNA_cluster_flamenco
Rhino_2	piRNA_cluster_38C1.13	3.54441	-5.08868	1.86926	-2.72229	0.00648315	0.0197901	piRNA_cluster_38C1
Rhino_2	piRNA_cluster_42AB.150	3.53441	-5.08529	1.86807	-2.72221	0.00648462	0.0197901	piRNA_cluster_42AB
Rhino_2	piRNA_cluster_42AB.189	7.16382	-3.54539	1.30697	-2.71267	0.00667425	0.0202191	piRNA_cluster_42AB
Rhino_2	piRNA_cluster_38C1.12	3.49441	-5.07149	1.89924	-2.67028	0.00757887	0.0226268	piRNA_cluster_38C1
Rhino_2	piRNA_cluster_38C2.19	3.49441	-5.07149	1.89924	-2.67028	0.00757887	0.0226268	piRNA_cluster_38C2
Rhino_2	piRNA_cluster_80F.26	6.25834	-4.3912	1.67031	-2.62897	0.0085644	0.0253851	piRNA_cluster_80F
Rhino_2	piRNA_cluster_42AB.56	6.24834	-4.38919	1.67149	-2.62591	0.00864189	0.0254318	piRNA_cluster_42AB
Rhino_2	piRNA_cluster_42AB.149	3.28851	-4.98306	1.90716	-2.61282	0.00897989	0.0260789	piRNA_cluster_42AB
Rhino_2	piRNA_cluster_80F.40	16.2674	-1.76178	0.684106	-2.57531	0.0100151	0.0288415	piRNA_cluster_80F
Rhino_2	piRNA_cluster_42AB.15	13.9016	-1.94665	0.756554	-2.57305	0.0100805	0.0288415	piRNA_cluster_42AB
Rhino_2	piRNA_cluster_20A.20	1044.46	0.221759	0.0867747	2.55557	0.0106013	0.0301223	piRNA_cluster_20A
Rhino_2	piRNA_cluster_42AB.227	7.45285	-2.95044	1.1608	-2.54173	0.0110306	0.0306776	piRNA_cluster_42AB
Rhino_2	piRNA_cluster_42AB.175	3.11261	-4.90041	1.92943	-2.53982	0.0110909	0.0306776	piRNA_cluster_42AB
Rhino_2	piRNA_cluster_42AB.142	3.08261	-4.88876	1.92493	-2.53971	0.0110946	0.0306776	piRNA_cluster_42AB
Rhino_2	piRNA_cluster_38C2.85	3.08261	-4.88876	1.92493	-2.53971	0.0110946	0.0306776	piRNA_cluster_38C2
Rhino_2	piRNA_cluster_38C1.5	3.06261	-4.88087	1.94477	-2.50974	0.0120819	0.0329652	piRNA_cluster_38C1
Rhino_2	piRNA_cluster_42AB.49	5.59064	-4.21934	1.69765	-2.4854	0.0129407	0.035076	piRNA_cluster_42AB
Rhino_2	piRNA_cluster_38C2.37	5.65064	-4.2323	1.71574	-2.46674	0.0136348	0.0367159	piRNA_cluster_38C2
Rhino_2	piRNA_cluster_38C2.78	2.88671	-4.792	1.95896	-2.44619	0.0144373	0.0379952	piRNA_cluster_38C2
Rhino_2	piRNA_cluster_42AB.147	2.85671	-4.77943	1.96155	-2.43656	0.0148277	0.0386646	piRNA_cluster_42AB
Rhino_2	piRNA_cluster_42AB.48	5.40474	-4.1656	1.71199	-2.43319	0.0149666	0.0387813	piRNA_cluster_42AB
Rhino_2	piRNA_cluster_38C2.75	10.3099	-2.10926	0.897195	-2.35095	0.0187254	0.0482179	piRNA_cluster_38C2
Rhino_2	piRNA_cluster_38C2.7	2.66081	-4.67477	1.99374	-2.34473	0.0190408	0.0487256	piRNA_cluster_38C2
Rhino_2	piRNA_cluster_38C2.15	2.6408	-4.66571	1.99583	-2.33773	0.0194013	0.0493416	piRNA_cluster_38C2
Rhino_2	piRNA_cluster_38C2.14	2.6308	-4.66113	2.00595	-2.32366	0.0201438	NA	piRNA_cluster_38C2
Rhino_2	piRNA_cluster_38C2.91	2.6208	-4.65647	2.02352	-2.30117	0.0213821	NA	piRNA_cluster_38C2
Rhino_2	piRNA_cluster_42AB.191	20.8458	-1.33755	0.58551	-2.28442	0.0223466	0.0557987	piRNA_cluster_42AB
Rhino_2	piRNA_cluster_42AB.186	11.5569	-1.83	0.804461	-2.27481	0.0229174	0.0568792	piRNA_cluster_42AB
Rhino_2	piRNA_cluster_38C2.25	4.66579	-3.96647	1.75142	-2.26471	0.0235302	0.0580506	piRNA_cluster_38C2
Rhino_2	piRNA_cluster_42AB.181	4.65579	-3.96386	1.757	-2.25605	0.0240678	0.0590233	piRNA_cluster_42AB
Rhino_2	piRNA_cluster_80F.49	43.9467	0.851147	0.379816	2.24094	0.0250297	0.0610191	piRNA_cluster_80F
Rhino_2	piRNA_cluster_38C2.44	5.46662	-3.1126	1.39528	-2.23081	0.0256939	0.0622699	piRNA_cluster_38C2
Rhino_2	piRNA_cluster_42AB.241	7.10292	-2.39904	1.08654	-2.20796	0.0272467	0.0648882	piRNA_cluster_42AB
Rhino_2	piRNA_cluster_42AB.260	63.6777	0.697469	0.316248	2.20545	0.0274226	0.0649317	piRNA_cluster_42AB
Rhino_2	piRNA_cluster_38C1.22	2.4049	-4.53223	2.06134	-2.19868	0.0279004	NA	piRNA_cluster_38C1
Rhino_2	piRNA_cluster_42AB.136	4.24398	-3.8202	1.77687	-2.14996	0.0315587	0.0742981	piRNA_cluster_42AB
Rhino_2	piRNA_cluster_42AB.215	14.3343	-1.51832	0.707101	-2.14724	0.0317742	0.0743804	piRNA_cluster_42AB
Rhino_2	piRNA_cluster_42AB.217	11.1364	-1.7483	0.819056	-2.13453	0.0327991	0.0763458	piRNA_cluster_42AB
Rhino_2	piRNA_cluster_flamenco.137	3.55424	3.92645	1.86391	2.10656	0.0351554	0.0811157	piRNA_cluster_flamenco
Rhino_2	piRNA_cluster_80F.41	18.3859	-1.28491	0.610242	-2.10557	0.035242	0.0811157	piRNA_cluster_80F
Rhino_2	piRNA_cluster_80F.38	11.9585	-1.66397	0.791188	-2.10313	0.0354544	0.0811512	piRNA_cluster_80F
Rhino_2	piRNA_cluster_38C2.23	4.03808	-3.74273	1.79684	-2.08295	0.0372561	0.0848038	piRNA_cluster_38C2
Rhino_2	piRNA_cluster_38C2.74	9.23416	-1.86612	0.917063	-2.03489	0.0418624	0.0947653	piRNA_cluster_38C2
Rhino_2	piRNA_cluster_flamenco.37	22.2263	1.10165	0.542701	2.02994	0.0423627	0.095374	piRNA_cluster_flamenco
Rhino_2	piRNA_cluster_42AB.239	9.74659	-1.73922	0.865722	-2.00898	0.0445393	0.0997292	piRNA_cluster_42AB
Rhino_2	piRNA_cluster_42AB.182	10.4674	-1.64401	0.82796	-1.98561	0.0470762	0.10484	piRNA_cluster_42AB
Rhino_2	piRNA_cluster_42AB.221	9.32666	-1.84935	0.933339	-1.98144	0.0475421	0.105114	piRNA_cluster_42AB
Rhino_2	piRNA_cluster_42AB.207	25.7695	-1.06296	0.536865	-1.97995	0.0477094	0.105114	piRNA_cluster_42AB
Rhino_2	piRNA_cluster_38C2.13	4.54301	-2.81337	1.43668	-1.95824	0.0502015	0.110016	piRNA_cluster_38C2
Rhino_2	piRNA_cluster_42AB.249	5.27384	-2.36789	1.2595	-1.88002	0.0601059	0.131024	piRNA_cluster_42AB
Rhino_2	piRNA_cluster_42AB.242	5.22259	-2.38213	1.27348	-1.87057	0.0614049	0.133152	piRNA_cluster_42AB
Rhino_2	piRNA_cluster_42AB.2	401.415	0.233071	0.126355	1.84457	0.0650998	0.140036	piRNA_cluster_42AB
Rhino_2	piRNA_cluster_38C2.46	5.20134	-2.4058	1.30526	-1.84316	0.0653062	0.140036	piRNA_cluster_38C2
Rhino_2	piRNA_cluster_42AB.9	12.2169	-1.37705	0.750968	-1.83371	0.0666976	0.141646	piRNA_cluster_42AB
Rhino_2	piRNA_cluster_42AB.223	16.4118	-1.19558	0.670417	-1.78333	0.0745323	0.157473	piRNA_cluster_42AB
Rhino_2	piRNA_cluster_42AB.155	3.18573	-3.33849	1.88276	-1.77319	0.0761977	0.159358	piRNA_cluster_42AB
Rhino_2	piRNA_cluster_42AB.195	18.9646	-1.04703	0.592378	-1.76749	0.0771454	0.160525	piRNA_cluster_42AB
Rhino_2	piRNA_cluster_38C2.73	4.03996	-2.66132	1.5264	-1.74352	0.0812427	0.16808	piRNA_cluster_38C2
Rhino_2	piRNA_cluster_80F.39	8.12341	-1.64257	0.943182	-1.74152	0.0815922	0.16808	piRNA_cluster_80F
Rhino_2	piRNA_cluster_38C1.15	6.03592	-2.06229	1.19295	-1.72873	0.0838581	0.17143	piRNA_cluster_38C1
Rhino_2	piRNA_cluster_flamenco.27	13.7341	1.18902	0.688228	1.72765	0.0840506	0.17143	piRNA_cluster_flamenco
Rhino_2	piRNA_cluster_80F.6	23.5011	0.917603	0.532942	1.72177	0.085111	0.172738	piRNA_cluster_80F
Rhino_2	piRNA_cluster_flamenco.36	11.4691	1.29601	0.761305	1.70235	0.0886889	0.179117	piRNA_cluster_flamenco
Rhino_2	piRNA_cluster_42AB.34	15.2263	1.09956	0.652772	1.68445	0.0920953	0.184756	piRNA_cluster_42AB
Rhino_2	piRNA_cluster_42AB.213	2.93983	-3.21182	1.91121	-1.68052	0.092857	0.184817	piRNA_cluster_42AB
Rhino_2	piRNA_cluster_38C2.77	2.92983	-3.20712	1.92036	-1.67006	0.0949075	0.18709	piRNA_cluster_38C2
Rhino_2	piRNA_cluster_42AB.216	12.9796	-1.18717	0.726341	-1.63445	0.102164	0.200436	piRNA_cluster_42AB
Rhino_2	piRNA_cluster_flamenco.153	6.20995	-1.79745	1.10481	-1.62693	0.103752	0.202587	piRNA_cluster_flamenco
Rhino_2	piRNA_cluster_42AB.228	5.8186	1.77191	1.09261	1.62172	0.104863	0.20379	piRNA_cluster_42AB
Rhino_2	piRNA_cluster_38C2.80	2.69268	-3.10966	1.94942	-1.59517	0.110674	0.213073	piRNA_cluster_38C2
Rhino_2	piRNA_cluster_38C2.47	14.2284	1.05308	0.671635	1.56794	0.116896	0.222969	piRNA_cluster_38C2
Rhino_2	piRNA_cluster_80F.46	32.3449	0.689756	0.451333	1.52826	0.126447	0.240074	piRNA_cluster_80F
Rhino_2	piRNA_cluster_42AB.192	17.5564	-0.94354	0.628032	-1.50238	0.133	0.251358	piRNA_cluster_42AB
Rhino_2	piRNA_cluster_42AB.202	2.48678	-2.98031	1.99043	-1.49732	0.134311	NA	piRNA_cluster_42AB
Rhino_2	piRNA_cluster_38C1.24	2.48678	-2.98031	1.99043	-1.49732	0.134311	NA	piRNA_cluster_38C1
Rhino_2	piRNA_cluster_38C2.96	2.51803	-2.95669	1.98301	-1.49102	0.135957	NA	piRNA_cluster_38C2
Rhino_2	piRNA_cluster_38C1.25	2.52803	-2.96168	1.99404	-1.48526	0.137474	NA	piRNA_cluster_38C1
Rhino_2	piRNA_cluster_42AB.108	14.4406	-1.01639	0.684831	-1.48415	0.137769	0.258481	piRNA_cluster_42AB
Rhino_2	piRNA_cluster_42AB.144	3.0326	-4.86541	3.28466	-1.48125	0.13854	0.258481	piRNA_cluster_42AB
Rhino_2	piRNA_cluster_42AB.240	11.9307	-1.13427	0.765969	-1.48083	0.138651	0.258481	piRNA_cluster_42AB
Rhino_2	piRNA_cluster_38C2.79	2.53803	-2.96648	2.01589	-1.47155	0.141143	NA	piRNA_cluster_38C2
Rhino_2	piRNA_cluster_flamenco.212	7.27981	-1.42785	0.974425	-1.46532	0.142833	0.265077	piRNA_cluster_flamenco
Rhino_2	piRNA_cluster_42AB.238	8.93862	-1.30463	0.915729	-1.42468	0.154248	0.282959	piRNA_cluster_42AB
Rhino_2	piRNA_cluster_42AB.245	5.00732	-1.84009	1.29245	-1.42372	0.154529	0.282959	piRNA_cluster_42AB
Rhino_2	piRNA_cluster_42AB.54	4.14434	-1.94114	1.37579	-1.41093	0.158265	0.288518	piRNA_cluster_42AB
Rhino_2	piRNA_cluster_20A.8	5.36555	1.59174	1.14024	1.39597	0.162723	0.294043	piRNA_cluster_20A
Rhino_2	piRNA_cluster_38C1.21	3.17636	-2.25545	1.62105	-1.39135	0.16412	0.295272	piRNA_cluster_38C1
Rhino_2	piRNA_cluster_42AB.21	6.36433	-1.45595	1.05161	-1.3845	0.166206	0.297726	piRNA_cluster_42AB
Rhino_2	piRNA_cluster_42AB.5	13.2992	-0.964813	0.707479	-1.36373	0.172652	0.30529	piRNA_cluster_42AB
Rhino_2	piRNA_cluster_38C2.49	6.29165	1.36309	1.02235	1.33328	0.182439	0.321217	piRNA_cluster_38C2
Rhino_2	piRNA_cluster_42AB.24	3.26521	1.95788	1.48748	1.31624	0.188093	0.328366	piRNA_cluster_42AB
Rhino_2	piRNA_cluster_42AB.197	6.07718	-1.3902	1.06573	-1.30446	0.192077	0.33265	piRNA_cluster_42AB
Rhino_2	piRNA_cluster_42AB.222	13.1946	-0.933384	0.71567	-1.30421	0.192162	0.33265	piRNA_cluster_42AB
Rhino_2	piRNA_cluster_38C2.21	7.55884	-1.22541	0.941969	-1.30091	0.19329	0.333203	piRNA_cluster_38C2
Rhino_2	piRNA_cluster_80F.10	27.4031	-0.622836	0.487874	-1.27663	0.201732	0.344869	piRNA_cluster_80F
Rhino_2	piRNA_cluster_80F.12	42.0478	0.502257	0.394202	1.27411	0.202624	0.344963	piRNA_cluster_80F
Rhino_2	piRNA_cluster_80F.48	30.3448	0.580731	0.457106	1.27045	0.203924	0.345747	piRNA_cluster_80F
Rhino_2	piRNA_cluster_38C2.42	3.03296	-2.07164	1.63751	-1.26511	0.20583	0.347549	piRNA_cluster_38C2
Rhino_2	piRNA_cluster_42AB.198	3.76254	-1.75604	1.41153	-1.24407	0.213474	0.358985	piRNA_cluster_42AB
Rhino_2	piRNA_cluster_42AB.38	39.286	-0.491128	0.402901	-1.21898	0.222852	0.373232	piRNA_cluster_42AB
Rhino_2	piRNA_cluster_flamenco.155	5.18295	-1.39892	1.15182	-1.21453	0.224545	0.374544	piRNA_cluster_flamenco
Rhino_2	piRNA_cluster_42AB.201	3.50539	-1.66346	1.43885	-1.1561	0.24764	0.411401	piRNA_cluster_42AB
Rhino_2	piRNA_cluster_38C2.93	2.80706	-1.93027	1.67687	-1.15112	0.249683	0.41313	piRNA_cluster_38C2
Rhino_2	piRNA_cluster_flamenco.24	5.35269	1.31833	1.16515	1.13147	0.257856	0.422157	piRNA_cluster_flamenco
Rhino_2	piRNA_cluster_flamenco.148	6.42746	-1.1536	1.02032	-1.13063	0.258212	0.422157	piRNA_cluster_flamenco
Rhino_2	piRNA_cluster_20A.53	25.1449	0.558695	0.498707	1.12029	0.262592	0.427619	piRNA_cluster_20A
Rhino_2	piRNA_cluster_80F.45	39.7372	0.44594	0.400369	1.11382	0.265356	0.430419	piRNA_cluster_80F
Rhino_2	piRNA_cluster_flamenco.102	9.8232	-0.905512	0.81803	-1.10694	0.268319	0.433519	piRNA_cluster_flamenco
Rhino_2	piRNA_cluster_80F.13	42.6602	0.418985	0.392848	1.06653	0.286183	0.457472	piRNA_cluster_80F
Rhino_2	piRNA_cluster_42AB.10	6.91113	-1.03589	0.973616	-1.06396	0.287345	0.457472	piRNA_cluster_42AB
Rhino_2	piRNA_cluster_42AB.225	8.28029	-0.964185	0.906672	-1.06343	0.287585	0.457472	piRNA_cluster_42AB
Rhino_2	piRNA_cluster_42AB.23	12.7234	-0.732705	0.710404	-1.03139	0.302357	0.475671	piRNA_cluster_42AB
Rhino_2	piRNA_cluster_flamenco.40	29.8495	0.460435	0.462038	0.99653	0.318993	0.497822	piRNA_cluster_flamenco
Rhino_2	piRNA_cluster_42AB.235	7.44606	-0.931428	0.941331	-0.98948	0.322428	0.501285	piRNA_cluster_42AB
Rhino_2	piRNA_cluster_42AB.193	7.44731	-0.914929	0.94599	-0.967166	0.333461	0.512634	piRNA_cluster_42AB
Rhino_2	piRNA_cluster_flamenco.133	3.14083	1.36765	1.44802	0.944499	0.344915	0.528271	piRNA_cluster_flamenco
Rhino_2	piRNA_cluster_20A.16	9.03907	0.785774	0.841237	0.93407	0.350268	0.533919	piRNA_cluster_20A
Rhino_2	piRNA_cluster_flamenco.205	4.45274	-1.14989	1.23845	-0.928491	0.353153	0.533919	piRNA_cluster_flamenco
Rhino_2	piRNA_cluster_38C1.6	3.78442	-1.22749	1.32377	-0.927271	0.353786	0.533919	piRNA_cluster_38C1
Rhino_2	piRNA_cluster_flamenco.25	54.561	-0.311203	0.342929	-0.907487	0.36415	0.545562	piRNA_cluster_flamenco
Rhino_2	piRNA_cluster_flamenco.39	20.2659	0.50012	0.55375	0.903151	0.366446	0.54586	piRNA_cluster_flamenco
Rhino_2	piRNA_cluster_flamenco.8	64.034	-0.28446	0.315327	-0.902111	0.366998	0.54586	piRNA_cluster_flamenco
Rhino_2	piRNA_cluster_42AB.40	29.6818	-0.414052	0.466568	-0.887441	0.374841	0.55552	piRNA_cluster_42AB
Rhino_2	piRNA_cluster_80F.2	7.20651	0.783643	0.936422	0.836848	0.402678	0.59129	piRNA_cluster_80F
Rhino_2	piRNA_cluster_42AB.8	4.2781	-1.03126	1.2339	-0.835773	0.403282	0.59129	piRNA_cluster_42AB
Rhino_2	piRNA_cluster_20A.11	6.91176	-0.806855	0.96928	-0.832427	0.405168	0.591947	piRNA_cluster_20A
Rhino_2	piRNA_cluster_flamenco.41	21.2739	0.426639	0.543134	0.785513	0.432153	0.617332	piRNA_cluster_flamenco
Rhino_2	piRNA_cluster_42AB.25	2.83894	-1.20561	1.5405	-0.782609	0.433857	0.617332	piRNA_cluster_42AB
Rhino_2	piRNA_cluster_42AB.17	18.7432	-0.454299	0.580787	-0.782213	0.434089	0.617332	piRNA_cluster_42AB
Rhino_2	piRNA_cluster_20A.19	162.894	0.154074	0.197435	0.780378	0.435168	0.617332	piRNA_cluster_20A
Rhino_2	piRNA_cluster_42AB.16	17.4787	-0.46683	0.600754	-0.777073	0.437116	0.617332	piRNA_cluster_42AB
Rhino_2	piRNA_cluster_42AB.18	3.49727	-1.10781	1.4269	-0.776377	0.437526	0.617332	piRNA_cluster_42AB
Rhino_2	piRNA_cluster_flamenco.9	18.2593	0.443371	0.58635	0.756155	0.449556	0.63214	piRNA_cluster_flamenco
Rhino_2	piRNA_cluster_flamenco.26	25.8331	-0.367934	0.493392	-0.745723	0.455835	0.638789	piRNA_cluster_flamenco
Rhino_2	piRNA_cluster_20A.17	82.5753	0.206484	0.278547	0.74129	0.458518	0.640371	piRNA_cluster_20A
Rhino_2	piRNA_cluster_flamenco.113	5.44644	0.794017	1.08688	0.73055	0.465054	0.647305	piRNA_cluster_flamenco
Rhino_2	piRNA_cluster_flamenco.6	69.7557	0.216909	0.303709	0.7142	0.475104	0.659067	piRNA_cluster_flamenco
Rhino_2	piRNA_cluster_flamenco.29	5.35269	0.76654	1.07795	0.711108	0.477017	0.6595	piRNA_cluster_flamenco
Rhino_2	piRNA_cluster_flamenco.108	10.4719	-0.542871	0.781864	-0.694329	0.487476	0.671706	piRNA_cluster_flamenco
Rhino_2	piRNA_cluster_80F.47	26.4822	0.336907	0.489045	0.688908	0.490881	0.674144	piRNA_cluster_80F
Rhino_2	piRNA_cluster_42AB.26	2.64304	-1.04959	1.57775	-0.665246	0.505893	0.690159	piRNA_cluster_42AB
Rhino_2	piRNA_cluster_flamenco.103	6.54121	-0.655384	1.0006	-0.654988	0.512476	0.694539	piRNA_cluster_flamenco
Rhino_2	piRNA_cluster_flamenco.2	10.0654	0.490979	0.788445	0.622718	0.53347	0.712689	piRNA_cluster_flamenco
Rhino_2	piRNA_cluster_42AB.19	10.5291	0.487417	0.784519	0.621294	0.534406	0.712689	piRNA_cluster_42AB
Rhino_2	piRNA_cluster_38C2.76	5.80038	-0.662974	1.06737	-0.621126	0.534517	0.712689	piRNA_cluster_38C2
Rhino_2	piRNA_cluster_42AB.6	6.95239	-0.601186	0.987618	-0.608723	0.542708	0.721276	piRNA_cluster_42AB
Rhino_2	piRNA_cluster_42AB.35	13.7908	0.401669	0.674972	0.59509	0.551783	0.729644	piRNA_cluster_42AB
Rhino_2	piRNA_cluster_80F.42	19.8449	-0.336079	0.566072	-0.593704	0.55271	0.729644	piRNA_cluster_80F
Rhino_2	piRNA_cluster_20A.9	3.58263	0.780151	1.31937	0.591304	0.554317	0.729644	piRNA_cluster_20A
Rhino_2	piRNA_cluster_42AB.7	8.1994	-0.517992	0.885171	-0.585188	0.558421	0.732705	piRNA_cluster_42AB
Rhino_2	piRNA_cluster_20A.59	7.05963	0.541606	0.951899	0.568974	0.569374	0.741215	piRNA_cluster_20A
Rhino_2	piRNA_cluster_flamenco.1	25.884	-0.286639	0.513699	-0.55799	0.576851	0.745169	piRNA_cluster_flamenco
Rhino_2	piRNA_cluster_38C1.18	11.2133	-0.416224	0.747227	-0.557024	0.577511	0.745169	piRNA_cluster_38C1
Rhino_2	piRNA_cluster_42AB.22	13.5286	-0.389411	0.701416	-0.555179	0.578772	0.745169	piRNA_cluster_42AB
Rhino_2	piRNA_cluster_42AB.20	4.29872	-0.677922	1.24592	-0.544115	0.586362	0.748705	piRNA_cluster_42AB
Rhino_2	piRNA_cluster_42AB.234	4.31997	-0.6575	1.21046	-0.543184	0.587003	0.748705	piRNA_cluster_42AB
Rhino_2	piRNA_cluster_flamenco.3	32.9929	-0.240896	0.44546	-0.540781	0.588659	0.748705	piRNA_cluster_flamenco
Rhino_2	piRNA_cluster_42AB.41	33.5583	0.224379	0.431558	0.519927	0.603115	0.759888	piRNA_cluster_42AB
Rhino_2	piRNA_cluster_42AB.226	8.03475	-0.448357	0.881708	-0.508509	0.611096	0.767596	piRNA_cluster_42AB
Rhino_2	piRNA_cluster_80F.7	34.4179	0.225115	0.448008	0.502479	0.61533	0.770566	piRNA_cluster_80F
Rhino_2	piRNA_cluster_38C1.8	15.1144	0.360577	0.727821	0.49542	0.620303	0.774439	piRNA_cluster_38C1
Rhino_2	piRNA_cluster_42AB.28	18.0873	-0.278372	0.589074	-0.472558	0.636528	0.789909	piRNA_cluster_42AB
Rhino_2	piRNA_cluster_20A.10	5.39332	0.501981	1.09857	0.456939	0.647715	0.798977	piRNA_cluster_20A
Rhino_2	piRNA_cluster_42AB.37	48.0578	0.159688	0.361765	0.441413	0.658914	0.802445	piRNA_cluster_42AB
Rhino_2	piRNA_cluster_flamenco.154	10.2779	-0.342506	0.778712	-0.439837	0.660055	0.802445	piRNA_cluster_flamenco
Rhino_2	piRNA_cluster_flamenco.176	9.11872	0.361688	0.827923	0.436862	0.662212	0.802445	piRNA_cluster_flamenco
Rhino_2	piRNA_cluster_20A.4	2.83117	0.643346	1.48261	0.433926	0.664342	0.802665	piRNA_cluster_20A
Rhino_2	piRNA_cluster_20A.15	7.86885	-0.390996	0.932505	-0.419297	0.674999	0.807619	piRNA_cluster_20A
Rhino_2	piRNA_cluster_42AB.42	19.2126	0.23579	0.570736	0.413134	0.679509	0.807619	piRNA_cluster_42AB
Rhino_2	piRNA_cluster_42AB.109	23.825	0.211435	0.513604	0.411669	0.680582	0.807619	piRNA_cluster_42AB
Rhino_2	piRNA_cluster_38C2.38	6.63559	-0.402168	0.979803	-0.410458	0.68147	0.807619	piRNA_cluster_38C2
Rhino_2	piRNA_cluster_38C2.34	9.0446	-0.344001	0.846454	-0.406403	0.684447	0.807619	piRNA_cluster_38C2
Rhino_2	piRNA_cluster_20A.14	3.74603	0.526733	1.29739	0.405993	0.684748	0.807619	piRNA_cluster_20A
Rhino_2	piRNA_cluster_42AB.43	10.3922	0.322271	0.823612	0.39129	0.695583	0.816001	piRNA_cluster_42AB
Rhino_2	piRNA_cluster_flamenco.151	9.01371	0.332692	0.854923	0.389149	0.697166	0.816001	piRNA_cluster_flamenco
Rhino_2	piRNA_cluster_20A.1	2.73742	0.588698	1.52924	0.384961	0.700267	0.817183	piRNA_cluster_20A
Rhino_2	piRNA_cluster_42AB.199	2.72742	0.596874	1.56074	0.382429	0.702143	0.817183	piRNA_cluster_42AB
Rhino_2	piRNA_cluster_20A.58	9.9433	0.310027	0.828461	0.374221	0.70824	0.821957	piRNA_cluster_20A
Rhino_2	piRNA_cluster_42AB.237	5.01178	0.347705	1.10557	0.314503	0.753139	0.862324	piRNA_cluster_42AB
Rhino_2	piRNA_cluster_80F.3	55.8519	-0.104105	0.335585	-0.310219	0.756395	0.863254	piRNA_cluster_80F
Rhino_2	piRNA_cluster_42AB.29	12.4401	0.221477	0.721356	0.307029	0.758821	0.863631	piRNA_cluster_42AB
Rhino_2	piRNA_cluster_flamenco.107	8.12788	-0.262078	0.876845	-0.298887	0.765026	0.868294	piRNA_cluster_flamenco
Rhino_2	piRNA_cluster_42AB.196	40.866	0.115258	0.395588	0.291359	0.770777	0.868758	piRNA_cluster_42AB
Rhino_2	piRNA_cluster_20A.60	6.85212	-0.273124	0.949669	-0.287599	0.773654	0.868758	piRNA_cluster_20A
Rhino_2	piRNA_cluster_42AB.45	7.25615	0.266051	0.932157	0.285415	0.775326	0.868758	piRNA_cluster_42AB
Rhino_2	piRNA_cluster_42AB.30	14.1583	-0.193153	0.685396	-0.281813	0.778087	0.868758	piRNA_cluster_42AB
Rhino_2	piRNA_cluster_20A.5	4.4756	0.320582	1.20784	0.265417	0.790689	0.880442	piRNA_cluster_20A
Rhino_2	piRNA_cluster_42AB.107	2.98457	0.347813	1.43747	0.241962	0.80881	0.888612	piRNA_cluster_42AB
Rhino_2	piRNA_cluster_flamenco.149	3.16859	-0.329722	1.38967	-0.237266	0.81245	0.890199	piRNA_cluster_flamenco
Rhino_2	piRNA_cluster_20A.18	263.038	-0.0369172	0.157411	-0.234528	0.814575	0.890199	piRNA_cluster_20A
Rhino_2	piRNA_cluster_42AB.39	25.2188	-0.100651	0.497826	-0.202182	0.839775	0.91531	piRNA_cluster_42AB
Rhino_2	piRNA_cluster_flamenco.5	42.0751	0.0754515	0.391954	0.192501	0.84735	0.91666	piRNA_cluster_flamenco
Rhino_2	piRNA_cluster_80F.1	3.66227	-0.245876	1.29935	-0.18923	0.849913	0.91666	piRNA_cluster_80F
Rhino_2	piRNA_cluster_42AB.36	14.3877	0.122807	0.689683	0.178064	0.858673	0.920991	piRNA_cluster_42AB
Rhino_2	piRNA_cluster_flamenco.4	55.6556	-0.0598944	0.34115	-0.175566	0.860635	0.920991	piRNA_cluster_flamenco
Rhino_2	piRNA_cluster_42AB.190	5.39171	-0.172695	1.07211	-0.16108	0.872031	0.9303	piRNA_cluster_42AB
Rhino_2	piRNA_cluster_flamenco.7	71.5488	0.0478103	0.301129	0.15877	0.87385	0.9303	piRNA_cluster_flamenco
Rhino_2	piRNA_cluster_20A.7	5.88414	-0.154365	1.04624	-0.147543	0.882703	0.937304	piRNA_cluster_20A
Rhino_2	piRNA_cluster_80F.8	70.1527	0.0444541	0.314207	0.14148	0.88749	0.939964	piRNA_cluster_80F
Rhino_2	piRNA_cluster_20A.12	7.65482	-0.117807	0.899219	-0.13101	0.895767	0.946298	piRNA_cluster_20A
Rhino_2	piRNA_cluster_flamenco.105	4.19845	-0.144953	1.21281	-0.119519	0.904865	0.953463	piRNA_cluster_flamenco
Rhino_2	piRNA_cluster_42AB.44	10.3522	0.0756921	0.789735	0.095845	0.923644	0.965575	piRNA_cluster_42AB
Rhino_2	piRNA_cluster_flamenco.106	9.97107	0.0665734	0.788068	0.0844767	0.932677	0.965575	piRNA_cluster_flamenco
Rhino_2	piRNA_cluster_42AB.32	12.0598	-0.0592967	0.722964	-0.0820189	0.934632	0.965575	piRNA_cluster_42AB
Rhino_2	piRNA_cluster_flamenco.38	18.9123	0.0470233	0.577598	0.0814117	0.935115	0.965575	piRNA_cluster_flamenco
Rhino_2	piRNA_cluster_80F.11	32.7121	-0.0354419	0.437525	-0.0810055	0.935438	0.965575	piRNA_cluster_80F
Rhino_2	piRNA_cluster_42AB.33	14.3529	-0.0519986	0.662628	-0.0784734	0.937452	0.965575	piRNA_cluster_42AB
Rhino_2	piRNA_cluster_20A.3	2.75804	0.105141	1.48308	0.0708939	0.943482	0.969363	piRNA_cluster_20A
Rhino_2	piRNA_cluster_flamenco.104	4.93991	0.0732144	1.13337	0.064599	0.948493	0.972088	piRNA_cluster_flamenco
Rhino_2	piRNA_cluster_42AB.27	5.34983	0.0550945	1.14412	0.0481546	0.961593	0.98004	piRNA_cluster_42AB
Rhino_2	piRNA_cluster_80F.9	35.9545	0.0191837	0.417936	0.045901	0.963389	0.98004	piRNA_cluster_80F
Rhino_2	piRNA_cluster_20A.13	5.66949	-0.0287768	1.04108	-0.0276412	0.977948	0.987668	piRNA_cluster_20A
Rhino_2	piRNA_cluster_42AB.4	13.2034	-0.0110164	0.697474	-0.0157947	0.987398	0.990137	piRNA_cluster_42AB
Rhino_2	piRNA_cluster_flamenco.150	3.9713	-0.0192411	1.25149	-0.0153746	0.987733	0.990137	piRNA_cluster_flamenco
Rhino_2	piRNA_cluster_42AB.214	6.16316	-0.00368239	1.00173	-0.00367605	0.997067	0.997067	piRNA_cluster_42AB
