# Supplementary material for: Heterochromatin-dependent transcription of satellite DNAs in the Drosophila melanogaster female germline
Source: eLife journal article supplement (doi:10.7554/elife.62375), 2021-07-13
Supplement: supp [file elife-62375-supp-v1.zip › elife_poa_e62375_Figure_3_source_data_1.xlsx]

## Sheet: copy number
Figure 3-source data. Rsp copy number and expression level estimated from qPCR and q-RT-PCR
#genotype	#Rsp copy number estimated from qPCR
moon mutant	464.516
rhi mutant	360.403
moon mutant	388.637
rhi mutant	430.386
w1118	538.456
w1-OregonR	500.82
w1-OregonR	560.921
w1118	446.447

## Sheet: expression level
Figure 3-source data. Rsp copy number and expression level estimated from qPCR and q-RT-PCR
#genotype	#Rsp transcript level in mutants compared to wild types (ΔΔCt)
moon mutant	-0.501497
rhi mutant	-1.52892
moon mutant	-1.77314
rhi mutant	-0.690029
moon mutant	-1.26235
rhi mutant	-0.30436
moon mutant	-0.224839
rhi mutant	-0.803463
