# Supplementary material for: Heterochromatin-dependent transcription of satellite DNAs in the Drosophila melanogaster female germline
Source: eLife journal article supplement (doi:10.7554/elife.62375), 2021-07-13
Supplement: supp [file elife-62375-supp-v1.zip › elife_poa_e62375_Figure_4_figure_supplement_1_source_data_1.csv]

Figure 4�figure supplement 1-source data. Log2 fold change of total RNA abundance for satDNA and piRNA clusters in piwi embryonic knockdown ovaries (Data from (Akkouche, et al. 2017))
protein	repeatID	baseMean	log2FoldChange	lfcSE	stat	pvalue	padj
Piwi	Rsp_SAT	133.7226589	1.969562046	0.323176101	6.094392616	1.10E-09	4.14E-08
Piwi	1pt688_SAT	1553.015013	0.562725591	0.243418908	2.311757927	0.020791027	0.242143774
Piwi	piRNA_cluster_38C1	287.4946415	1.538426688	0.223863933	6.872150725	6.32E-12	7.28E-10
Piwi	piRNA_cluster_38C2	645.86368	0.504200887	0.178000089	2.832587844	0.004617288	0.103644972
Piwi	piRNA_cluster_flamenco	838.6621194	0.231672295	0.17106745	1.354274557	0.1756488	0.857252012
Piwi	piRNA_cluster_42AB	3837.563844	0.182587425	0.159839238	1.142319167	0.253321377	0.92929789
Piwi	piRNA_cluster_80F	3190.31586	-0.121479946	0.165275256	-0.735015926	0.462329795	0.993163367
Piwi	piRNA_cluster_20A	8324.037083	-0.112394072	0.166672189	-0.674342085	0.500093853	0.993163367
