# Supplementary material for: Heterochromatin-dependent transcription of satellite DNAs in the Drosophila melanogaster female germline
Source: eLife journal article supplement (doi:10.7554/elife.62375), 2021-07-13
Supplement: supp [file elife-62375-supp-v1.zip › elife_poa_e62375_Figure_4_source_data_1.xlsx]

## Sheet: Sheet1
Figure 4-source data 1. Log2 fold change of H3K9me3 ChIP/input enrichment for satDNAs and piRNA clusters in piwi embryonic knockdown ovaries. (Data from (Akkouche, et al. 2017))
#condition	#repeat	#log2_FC
ovary_Akkouche_H3K9me3_piwiemKD	Rsp_SAT	-2.2
ovary_Akkouche_H3K9me3_piwiemKD	1pt688_SAT	-2.36
ovary_Akkouche_H3K9me3_piwiemKD	Rsp_SAT	-2.32
ovary_Akkouche_H3K9me3_piwiemKD	1pt688_SAT	-2.47
ovary_Akkouche_H3K9me3_piwiemKD	Rsp_SAT	-2
ovary_Akkouche_H3K9me3_piwiemKD	1pt688_SAT	-2.56
ovary_Akkouche_H3K9me3_piwiemKD	piRNA_cluster_20A	-0.26
ovary_Akkouche_H3K9me3_piwiemKD	piRNA_cluster_flamenco	-0.91
ovary_Akkouche_H3K9me3_piwiemKD	piRNA_cluster_42AB	-1.42
ovary_Akkouche_H3K9me3_piwiemKD	piRNA_cluster_38C1	-0.35
ovary_Akkouche_H3K9me3_piwiemKD	piRNA_cluster_38C2	-0.32
ovary_Akkouche_H3K9me3_piwiemKD	piRNA_cluster_80F	-0.56
ovary_Akkouche_H3K9me3_piwiemKD	piRNA_cluster_20A	-0.53
ovary_Akkouche_H3K9me3_piwiemKD	piRNA_cluster_flamenco	-1.13
ovary_Akkouche_H3K9me3_piwiemKD	piRNA_cluster_42AB	-1.73
ovary_Akkouche_H3K9me3_piwiemKD	piRNA_cluster_38C1	-0.56
ovary_Akkouche_H3K9me3_piwiemKD	piRNA_cluster_38C2	-0.82
ovary_Akkouche_H3K9me3_piwiemKD	piRNA_cluster_80F	-0.56
ovary_Akkouche_H3K9me3_piwiemKD	piRNA_cluster_20A	-0.78
ovary_Akkouche_H3K9me3_piwiemKD	piRNA_cluster_flamenco	-1.19
ovary_Akkouche_H3K9me3_piwiemKD	piRNA_cluster_42AB	-1.35
ovary_Akkouche_H3K9me3_piwiemKD	piRNA_cluster_38C1	-0.6
ovary_Akkouche_H3K9me3_piwiemKD	piRNA_cluster_38C2	-0.83
ovary_Akkouche_H3K9me3_piwiemKD	piRNA_cluster_80F	-0.55
