# Supplementary material for: Heterochromatin-dependent transcription of satellite DNAs in the Drosophila melanogaster female germline
Source: eLife journal article supplement (doi:10.7554/elife.62375), 2021-07-13
Supplement: supp [file elife-62375-supp-v1.zip › elife_poa_e62375_Figure_4_source_data_2.xlsx]

## Sheet: Sheet1
Figure 4-Source Data 2. Log2 fold change of small RNA abundance for satDNAs and piRNA clsuters in piwi embryonic knockdown ovaries. (Data from (Akkouche, et al. 2017))
#study	replicate	repeat	log2FC
embPiwiKD	embPiwiKD_rep0	Rsp_SAT	-0.800591
embPiwiKD	embPiwiKD_rep0	1pt688_SAT	-0.383493
embPiwiKD	embPiwiKD_rep1	Rsp_SAT	1.103
embPiwiKD	embPiwiKD_rep1	1pt688_SAT	-0.0801801
embPiwiKD	embPiwiKD_rep2	Rsp_SAT	-0.415729
embPiwiKD	embPiwiKD_rep2	1pt688_SAT	-0.820582
embPiwiKD	embPiwiKD_rep0	piRNA_cluster_20A	-1.41019
embPiwiKD	embPiwiKD_rep0	piRNA_cluster_flamenco	-0.593829
embPiwiKD	embPiwiKD_rep0	piRNA_cluster_42AB	-1.33997
embPiwiKD	embPiwiKD_rep0	piRNA_cluster_38C1	-1.18627
embPiwiKD	embPiwiKD_rep0	piRNA_cluster_38C2	-1.14302
embPiwiKD	embPiwiKD_rep0	piRNA_cluster_80F	-0.313674
embPiwiKD	embPiwiKD_rep1	piRNA_cluster_20A	-1.95016
embPiwiKD	embPiwiKD_rep1	piRNA_cluster_flamenco	0.298309
embPiwiKD	embPiwiKD_rep1	piRNA_cluster_42AB	-0.854749
embPiwiKD	embPiwiKD_rep1	piRNA_cluster_38C1	0.00942079
embPiwiKD	embPiwiKD_rep1	piRNA_cluster_38C2	-0.252149
embPiwiKD	embPiwiKD_rep1	piRNA_cluster_80F	-0.504453
embPiwiKD	embPiwiKD_rep2	piRNA_cluster_20A	-2.53519
embPiwiKD	embPiwiKD_rep2	piRNA_cluster_flamenco	-0.767729
embPiwiKD	embPiwiKD_rep2	piRNA_cluster_42AB	-1.67348
embPiwiKD	embPiwiKD_rep2	piRNA_cluster_38C1	-1.76378
embPiwiKD	embPiwiKD_rep2	piRNA_cluster_38C2	-1.93326
embPiwiKD	embPiwiKD_rep2	piRNA_cluster_80F	-1.28732
