# Supplementary material for: Heterochromatin-dependent transcription of satellite DNAs in the Drosophila melanogaster female germline
Source: eLife journal article supplement (doi:10.7554/elife.62375), 2021-07-13
Supplement: supp [file elife-62375-supp-v1.zip › elife_poa_e62375_Supplementary_file_6.xlsx]

## Sheet: Sheet1
Supplementary File 6. Log2 fold changes of small RNA abundance for satDNAs and piRNA clusters normalized to miRNA abundance in RDC and Moon mutants (data from (Klattenhoff, et al. 2009; Pane, et al. 2011; Czech, et al. 2013; Le Thomas, et al. 2014; Mohn, et al. 2014; Andersen, et al. 2017; Parhad, et al. 2017))
#Protein	#Replicate	#Repeat	#Log2_fold_change
Cutoff	Cutoff_1	Rsp_SAT	-8.00108
Cutoff	Cutoff_1	1pt688_SAT	-4.80837
Cutoff	Cutoff_2	Rsp_SAT	-2.96252
Cutoff	Cutoff_2	1pt688_SAT	-1.41826
Cutoff	Cutoff_3	Rsp_SAT	-6.68719
Cutoff	Cutoff_3	1pt688_SAT	-3.71627
Deadlock	Deadlock_1	Rsp_SAT	-8.42657
Deadlock	Deadlock_1	1pt688_SAT	-5.17796
Deadlock	Deadlock_2	Rsp_SAT	-4.36534
Deadlock	Deadlock_2	1pt688_SAT	-1.99849
Moonshiner	Moonshiner	Rsp_SAT	-4.83034
Moonshiner	Moonshiner	1pt688_SAT	-2.8615
Rhino	Rhino_1	Rsp_SAT	-8.28569
Rhino	Rhino_1	1pt688_SAT	-4.91275
Rhino	Rhino_2	Rsp_SAT	-5.65887
Rhino	Rhino_2	1pt688_SAT	-5.19684
Rhino	Rhino_3	Rsp_SAT	-9.0078
Rhino	Rhino_3	1pt688_SAT	-6.15746
Rhino	Rhino_4	Rsp_SAT	-3.97876
Rhino	Rhino_4	1pt688_SAT	-3.68491
Cutoff	Cutoff_1	piRNA_cluster_20A	0.726921
Cutoff	Cutoff_1	piRNA_cluster_flamenco	0.0149078
Cutoff	Cutoff_1	piRNA_cluster_42AB	-8.42073
Cutoff	Cutoff_1	piRNA_cluster_38C1	-7.06247
Cutoff	Cutoff_1	piRNA_cluster_38C2	-6.62752
Cutoff	Cutoff_1	piRNA_cluster_80F	-5.29482
Cutoff	Cutoff_2	piRNA_cluster_20A	-1.70065
Cutoff	Cutoff_2	piRNA_cluster_flamenco	0.455908
Cutoff	Cutoff_2	piRNA_cluster_42AB	-1.7419
Cutoff	Cutoff_2	piRNA_cluster_38C1	-2.59128
Cutoff	Cutoff_2	piRNA_cluster_38C2	-1.45191
Cutoff	Cutoff_2	piRNA_cluster_80F	-1.47738
Cutoff	Cutoff_3	piRNA_cluster_20A	-0.657513
Cutoff	Cutoff_3	piRNA_cluster_flamenco	-1.30899
Cutoff	Cutoff_3	piRNA_cluster_42AB	-6.86556
Cutoff	Cutoff_3	piRNA_cluster_38C1	-6.77405
Cutoff	Cutoff_3	piRNA_cluster_38C2	-5.42548
Cutoff	Cutoff_3	piRNA_cluster_80F	-6.19336
Deadlock	Deadlock_1	piRNA_cluster_20A	0.51746
Deadlock	Deadlock_1	piRNA_cluster_flamenco	0.100744
Deadlock	Deadlock_1	piRNA_cluster_42AB	-7.52322
Deadlock	Deadlock_1	piRNA_cluster_38C1	-8.09187
Deadlock	Deadlock_1	piRNA_cluster_38C2	-7.08186
Deadlock	Deadlock_1	piRNA_cluster_80F	-6.27652
Deadlock	Deadlock_2	piRNA_cluster_20A	0.71548
Deadlock	Deadlock_2	piRNA_cluster_flamenco	0.508084
Deadlock	Deadlock_2	piRNA_cluster_42AB	-3.26001
Deadlock	Deadlock_2	piRNA_cluster_38C1	-2.27188
Deadlock	Deadlock_2	piRNA_cluster_38C2	-1.01348
Deadlock	Deadlock_2	piRNA_cluster_80F	-4.71857
Moonshiner	Moonshiner	piRNA_cluster_20A	0.479143
Moonshiner	Moonshiner	piRNA_cluster_flamenco	0.345486
Moonshiner	Moonshiner	piRNA_cluster_42AB	-2.04372
Moonshiner	Moonshiner	piRNA_cluster_38C1	3.46403
Moonshiner	Moonshiner	piRNA_cluster_38C2	3.13436
Moonshiner	Moonshiner	piRNA_cluster_80F	-3.14958
Rhino	Rhino_1	piRNA_cluster_20A	0.520713
Rhino	Rhino_1	piRNA_cluster_flamenco	0.125884
Rhino	Rhino_1	piRNA_cluster_42AB	-7.88227
Rhino	Rhino_1	piRNA_cluster_38C1	-7.10889
Rhino	Rhino_1	piRNA_cluster_38C2	-5.96371
Rhino	Rhino_1	piRNA_cluster_80F	-6.02787
Rhino	Rhino_2	piRNA_cluster_20A	0.590281
Rhino	Rhino_2	piRNA_cluster_flamenco	-0.911193
Rhino	Rhino_2	piRNA_cluster_42AB	-6.43463
Rhino	Rhino_2	piRNA_cluster_38C1	-5.50314
Rhino	Rhino_2	piRNA_cluster_38C2	-4.92607
Rhino	Rhino_2	piRNA_cluster_80F	-6.63215
Rhino	Rhino_3	piRNA_cluster_20A	-0.931784
Rhino	Rhino_3	piRNA_cluster_flamenco	-1.09478
Rhino	Rhino_3	piRNA_cluster_42AB	-9.18705
Rhino	Rhino_3	piRNA_cluster_38C1	-8.82231
Rhino	Rhino_3	piRNA_cluster_38C2	-8.78633
Rhino	Rhino_3	piRNA_cluster_80F	-5.67758
Rhino	Rhino_4	piRNA_cluster_20A	1.93211
Rhino	Rhino_4	piRNA_cluster_flamenco	0.929705
Rhino	Rhino_4	piRNA_cluster_42AB	-4.65291
Rhino	Rhino_4	piRNA_cluster_38C1	-3.33247
Rhino	Rhino_4	piRNA_cluster_38C2	-3.0835
Rhino	Rhino_4	piRNA_cluster_80F	-4.69231
Cutoff	Cutoff_1	(AAGAG)n	0.966923
Cutoff	Cutoff_2	(AAGAG)n	2.06684
Cutoff	Cutoff_3	(AAGAG)n	-0.878531
Deadlock	Deadlock_1	(AAGAG)n	2.00928
Deadlock	Deadlock_2	(AAGAG)n	-6.6295
Moonshiner	Moonshiner	(AAGAG)n	0.178811
Rhino	Rhino_1	(AAGAG)n	1.769
Rhino	Rhino_2	(AAGAG)n	-0.119981
Rhino	Rhino_3	(AAGAG)n	-0.026314
Rhino	Rhino_4	(AAGAG)n	-0.472604
