# Supplementary material for: Heterochromatin-dependent transcription of satellite DNAs in the Drosophila melanogaster female germline
Source: eLife journal article supplement (doi:10.7554/elife.62375), 2021-07-13
Supplement: supp [file elife-62375-supp-v1.zip › elife_poa_e62375_Supplementary_file_7.xlsx]

## Sheet: Sheet1
Supplementary File 7. Log2 fold changes of small RNA abundance for satDNAs and piRNA clusters normalized to the flamenco piRNA cluster in RDC and Moon mutants (data from (Klattenhoff, et al. 2009; Pane, et al.2011; Czech, et al. 2013; Le Thomas, et al. 2014; Mohn, et al. 2014; Andersen, et al. 2017; Parhad, et al. 2017))
#Protein	#Replicate	#Repeat	#Log2_fold_change
Cutoff	Cutoff_1	Rsp_SAT	-7.81222
Cutoff	Cutoff_1	1pt688_SAT	-4.61887
Cutoff	Cutoff_2	Rsp_SAT	-3.05001
Cutoff	Cutoff_2	1pt688_SAT	-1.50558
Cutoff	Cutoff_3	Rsp_SAT	-5.59174
Cutoff	Cutoff_3	1pt688_SAT	-2.61991
Deadlock	Deadlock_1	Rsp_SAT	-8.36725
Deadlock	Deadlock_1	1pt688_SAT	-5.1178
Deadlock	Deadlock_2	Rsp_SAT	-4.53613
Deadlock	Deadlock_2	1pt688_SAT	-2.16918
Moonshiner	Moonshiner	Rsp_SAT	-4.93269
Moonshiner	Moonshiner	1pt688_SAT	-3.13442
Rhino	Rhino_1	Rsp_SAT	-8.19123
Rhino	Rhino_1	1pt688_SAT	-4.81752
Rhino	Rhino_2	Rsp_SAT	-4.50186
Rhino	Rhino_2	1pt688_SAT	-4.01131
Rhino	Rhino_3	Rsp_SAT	-7.9051
Rhino	Rhino_3	1pt688_SAT	-5.05293
Rhino	Rhino_4	Rsp_SAT	-4.9521
Rhino	Rhino_4	1pt688_SAT	-4.65829
Cutoff	Cutoff_1	piRNA_cluster_20A	0.712006
Cutoff	Cutoff_1	piRNA_cluster_flamenco	1.4427e-06
Cutoff	Cutoff_1	piRNA_cluster_42AB	-8.43571
Cutoff	Cutoff_1	piRNA_cluster_38C1	-7.0776
Cutoff	Cutoff_1	piRNA_cluster_38C2	-6.64281
Cutoff	Cutoff_1	piRNA_cluster_80F	-5.30981
Cutoff	Cutoff_2	piRNA_cluster_20A	-2.15641
Cutoff	Cutoff_2	piRNA_cluster_flamenco	7.21348e-07
Cutoff	Cutoff_2	piRNA_cluster_42AB	-2.19742
Cutoff	Cutoff_2	piRNA_cluster_38C1	-3.04748
Cutoff	Cutoff_2	piRNA_cluster_38C2	-1.90855
Cutoff	Cutoff_2	piRNA_cluster_80F	-1.93332
Cutoff	Cutoff_3	piRNA_cluster_20A	0.651479
Cutoff	Cutoff_3	piRNA_cluster_flamenco	0
Cutoff	Cutoff_3	piRNA_cluster_42AB	-5.55663
Cutoff	Cutoff_3	piRNA_cluster_38C1	-5.46569
Cutoff	Cutoff_3	piRNA_cluster_38C2	-4.11687
Cutoff	Cutoff_3	piRNA_cluster_80F	-4.88471
Deadlock	Deadlock_1	piRNA_cluster_20A	0.416718
Deadlock	Deadlock_1	piRNA_cluster_flamenco	1.4427e-06
Deadlock	Deadlock_1	piRNA_cluster_42AB	-7.624
Deadlock	Deadlock_1	piRNA_cluster_38C1	-8.19307
Deadlock	Deadlock_1	piRNA_cluster_38C2	-7.18313
Deadlock	Deadlock_1	piRNA_cluster_80F	-6.3774
Deadlock	Deadlock_2	piRNA_cluster_20A	0.207392
Deadlock	Deadlock_2	piRNA_cluster_flamenco	0
Deadlock	Deadlock_2	piRNA_cluster_42AB	-3.76809
Deadlock	Deadlock_2	piRNA_cluster_38C1	-2.77997
Deadlock	Deadlock_2	piRNA_cluster_38C2	-1.52157
Deadlock	Deadlock_2	piRNA_cluster_80F	-5.2267
Moonshiner	Moonshiner	piRNA_cluster_20A	0.114818
Moonshiner	Moonshiner	piRNA_cluster_flamenco	-1.4427e-06
Moonshiner	Moonshiner	piRNA_cluster_42AB	-2.34713
Moonshiner	Moonshiner	piRNA_cluster_38C1	3.25536
Moonshiner	Moonshiner	piRNA_cluster_38C2	2.76738
Moonshiner	Moonshiner	piRNA_cluster_80F	-3.43012
Rhino	Rhino_1	piRNA_cluster_20A	0.394831
Rhino	Rhino_1	piRNA_cluster_flamenco	0
Rhino	Rhino_1	piRNA_cluster_42AB	-8.0082
Rhino	Rhino_1	piRNA_cluster_38C1	-7.235
Rhino	Rhino_1	piRNA_cluster_38C2	-6.08984
Rhino	Rhino_1	piRNA_cluster_80F	-6.15387
Rhino	Rhino_2	piRNA_cluster_20A	1.38004
Rhino	Rhino_2	piRNA_cluster_flamenco	-1.4427e-06
Rhino	Rhino_2	piRNA_cluster_42AB	-5.58967
Rhino	Rhino_2	piRNA_cluster_38C1	-4.58489
Rhino	Rhino_2	piRNA_cluster_38C2	-4.14504
Rhino	Rhino_2	piRNA_cluster_80F	-5.7852
Rhino	Rhino_3	piRNA_cluster_20A	0.16299
Rhino	Rhino_3	piRNA_cluster_flamenco	0
Rhino	Rhino_3	piRNA_cluster_42AB	-8.09243
Rhino	Rhino_3	piRNA_cluster_38C1	-7.72818
Rhino	Rhino_3	piRNA_cluster_38C2	-7.69235
Rhino	Rhino_3	piRNA_cluster_80F	-4.58302
Rhino	Rhino_4	piRNA_cluster_20A	1.00241
Rhino	Rhino_4	piRNA_cluster_flamenco	7.21349e-06
Rhino	Rhino_4	piRNA_cluster_42AB	-5.58261
Rhino	Rhino_4	piRNA_cluster_38C1	-4.26216
Rhino	Rhino_4	piRNA_cluster_38C2	-4.01319
Rhino	Rhino_4	piRNA_cluster_80F	-5.62201
Cutoff	Cutoff_1	(AAGAG)n	1.15718
Cutoff	Cutoff_2	(AAGAG)n	1.9831
Cutoff	Cutoff_3	(AAGAG)n	0.216364
Deadlock	Deadlock_1	(AAGAG)n	2.07063
Deadlock	Deadlock_2	(AAGAG)n	-10.3726
Moonshiner	Moonshiner	(AAGAG)n	0.129188
Rhino	Rhino_1	(AAGAG)n	1.86534
Rhino	Rhino_2	(AAGAG)n	1.30101
Rhino	Rhino_3	(AAGAG)n	1.07804
Rhino	Rhino_4	(AAGAG)n	-1.44597
