# Supplementary figures and images for: Heterochromatin-dependent transcription of satellite DNAs in the Drosophila melanogaster female germline
Source: eLife journal article supplement (doi:10.7554/elife.62375), 2021-07-13

Figure 3-figure supplement 3

A

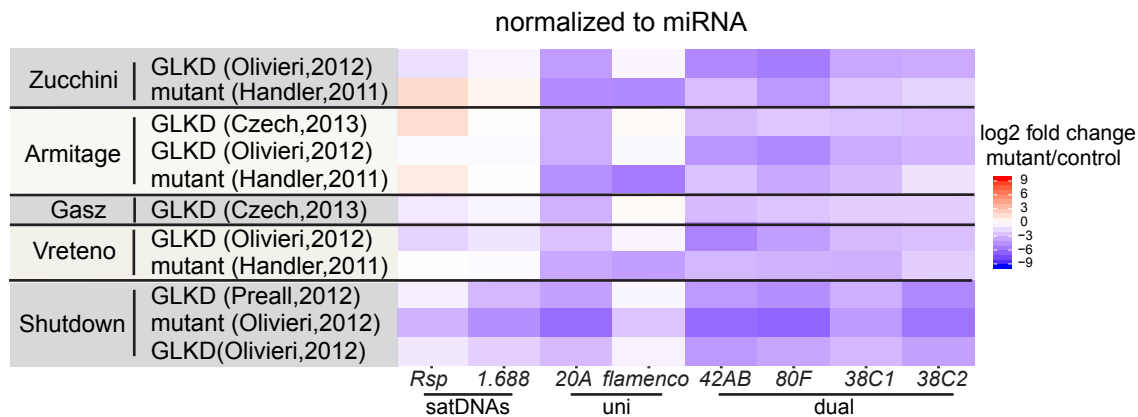

B

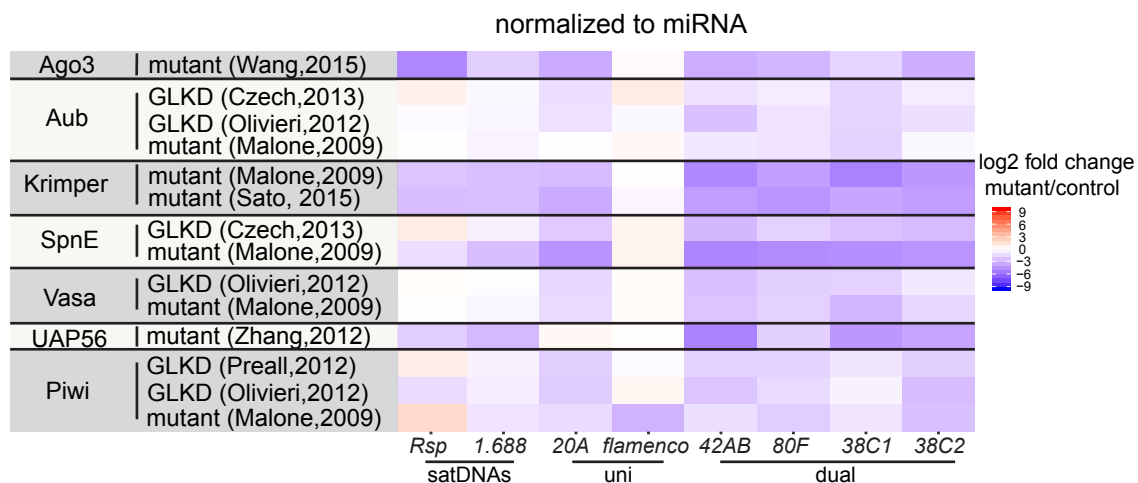

C

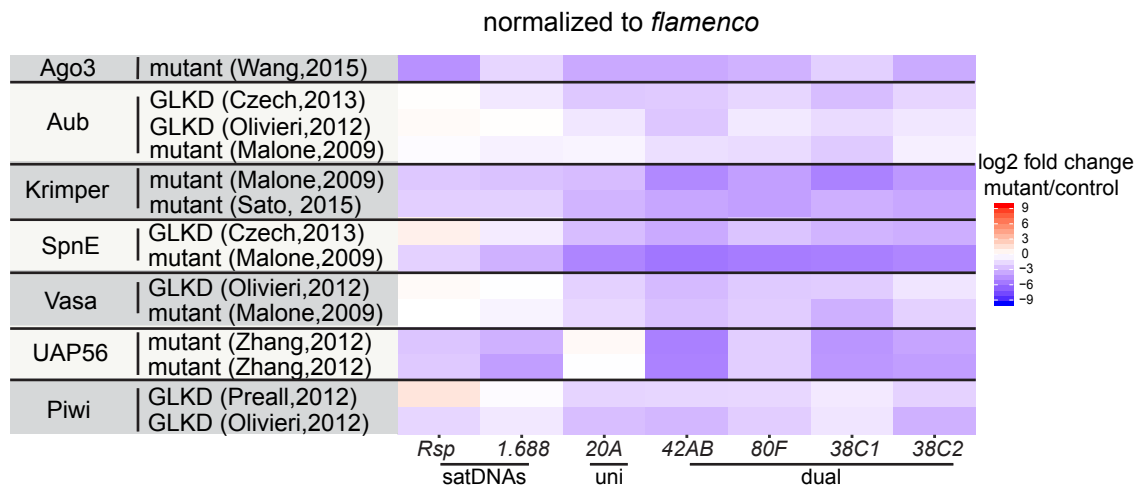

Supplement: supp [file elife-62375-supp-v1.zip]

Figure 3-figure supplement 1

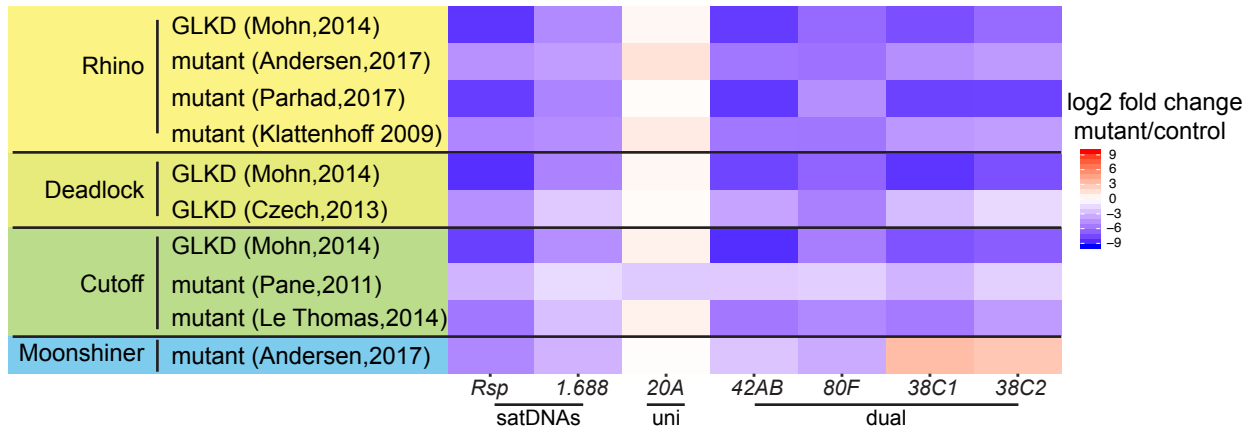

Supplement: supp [file elife-62375-supp-v1.zip]

Figure 3-figure supplement 2

A

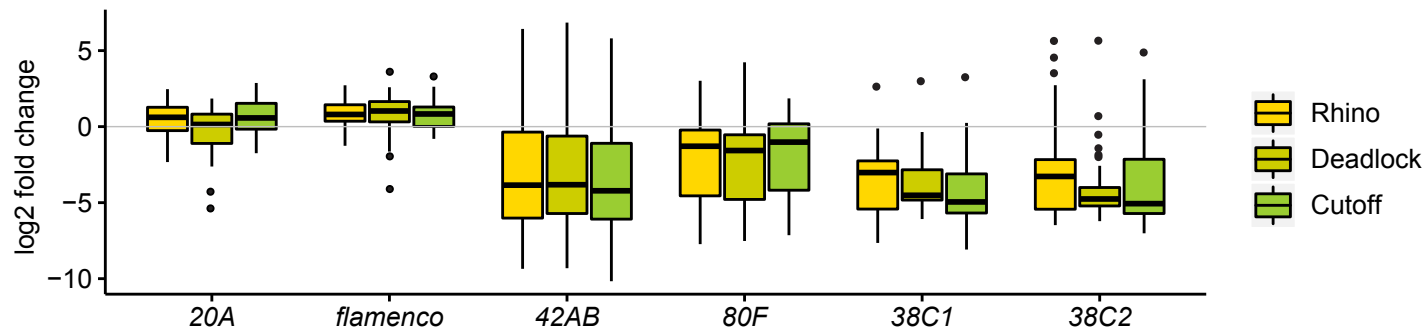

B

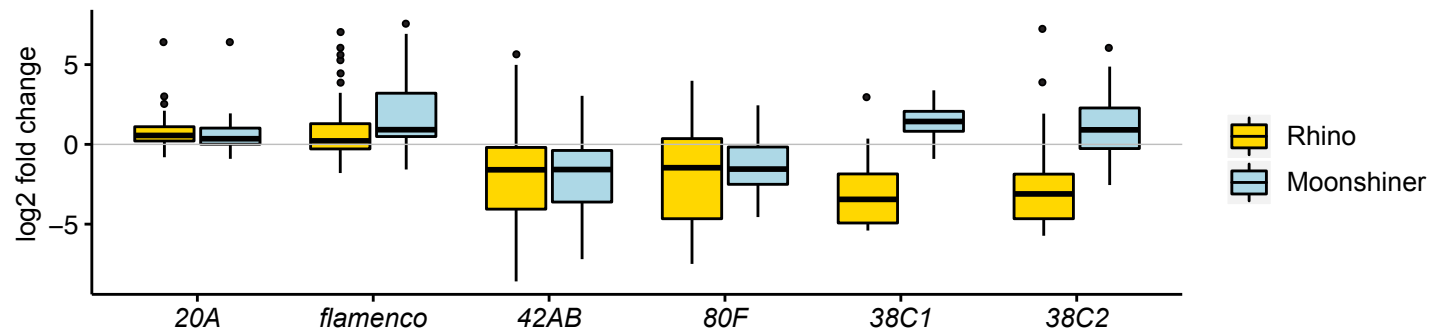

Supplement: supp [file elife-62375-supp-v1.zip]

Figure 2-figure supplement 2

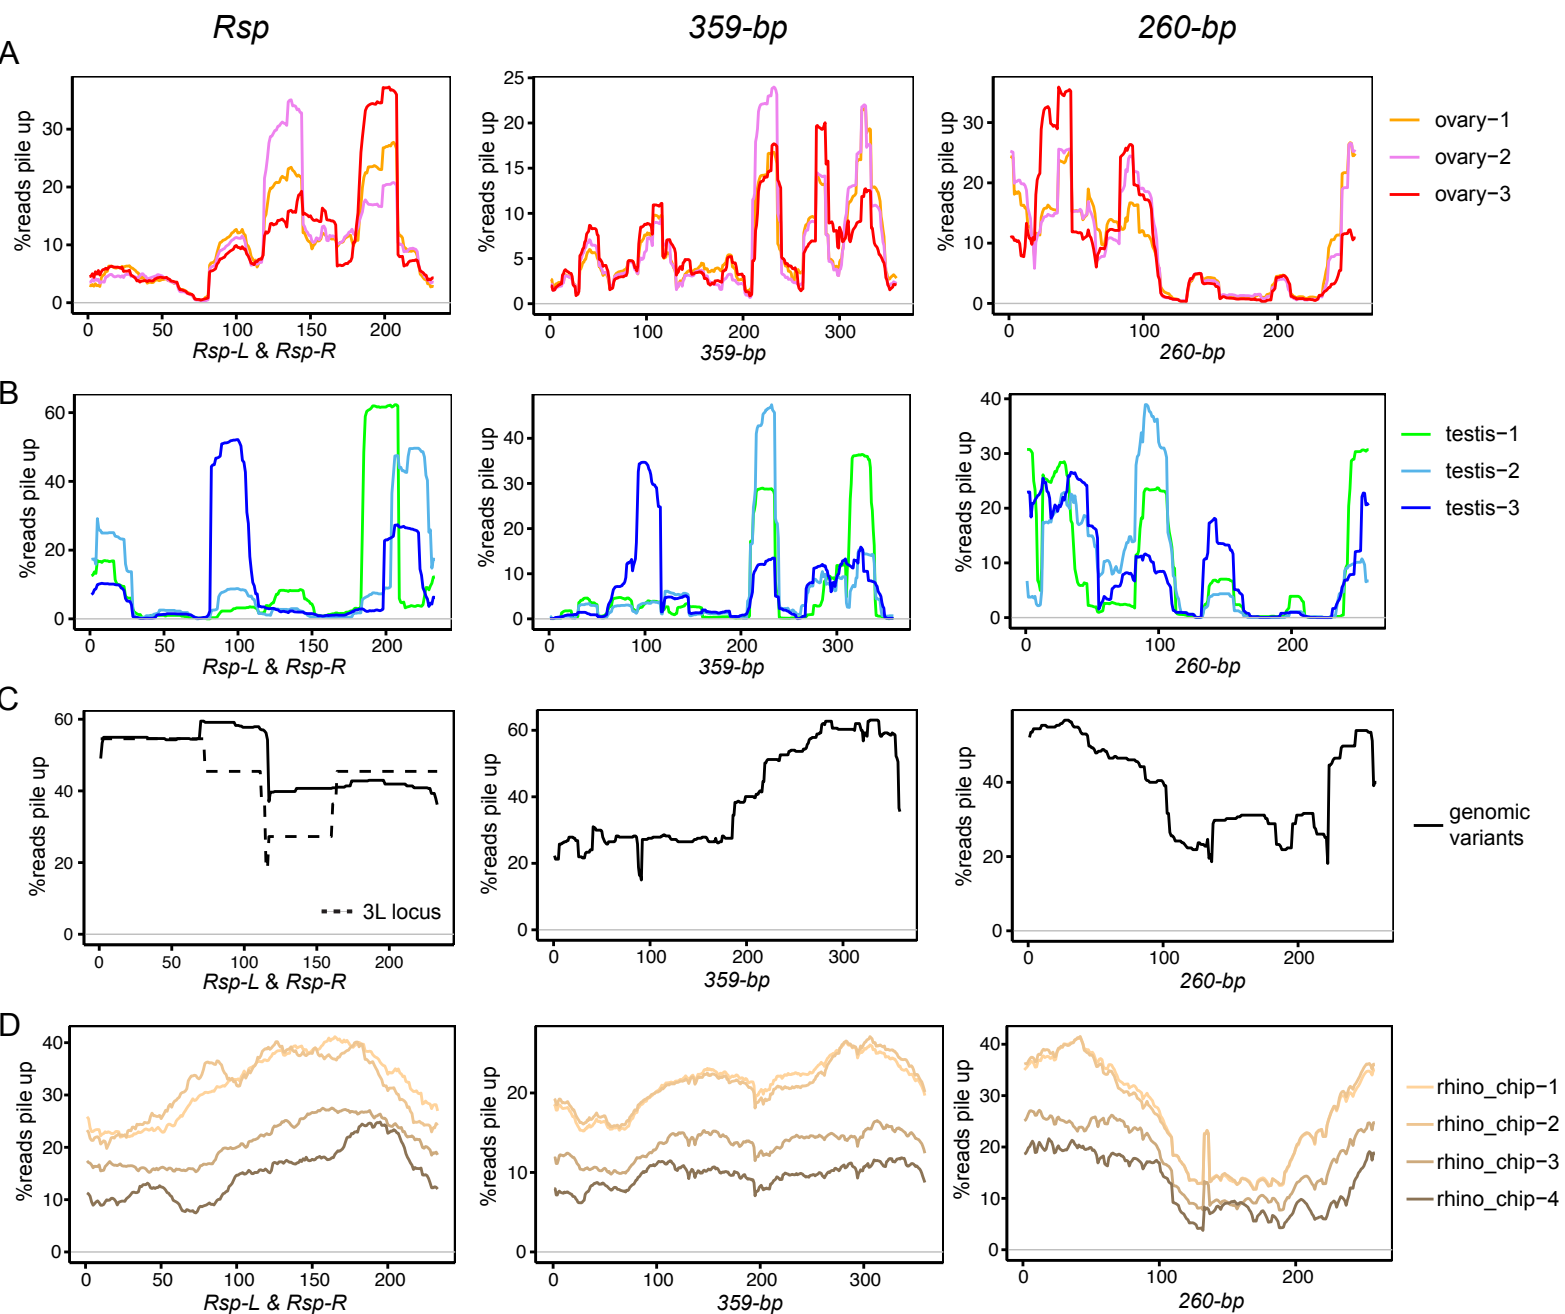

Supplement: supp [file elife-62375-supp-v1.zip]

Figure 4-figure supplement 1

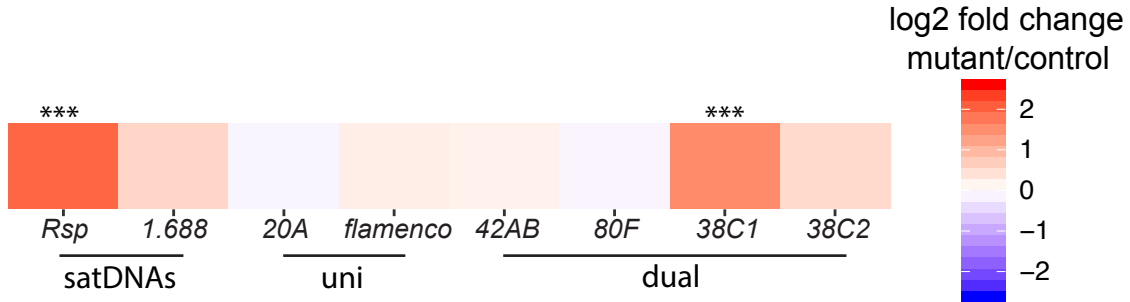

Supplement: supp [file elife-62375-supp-v1.zip]

Figure 2-figure supplement 1

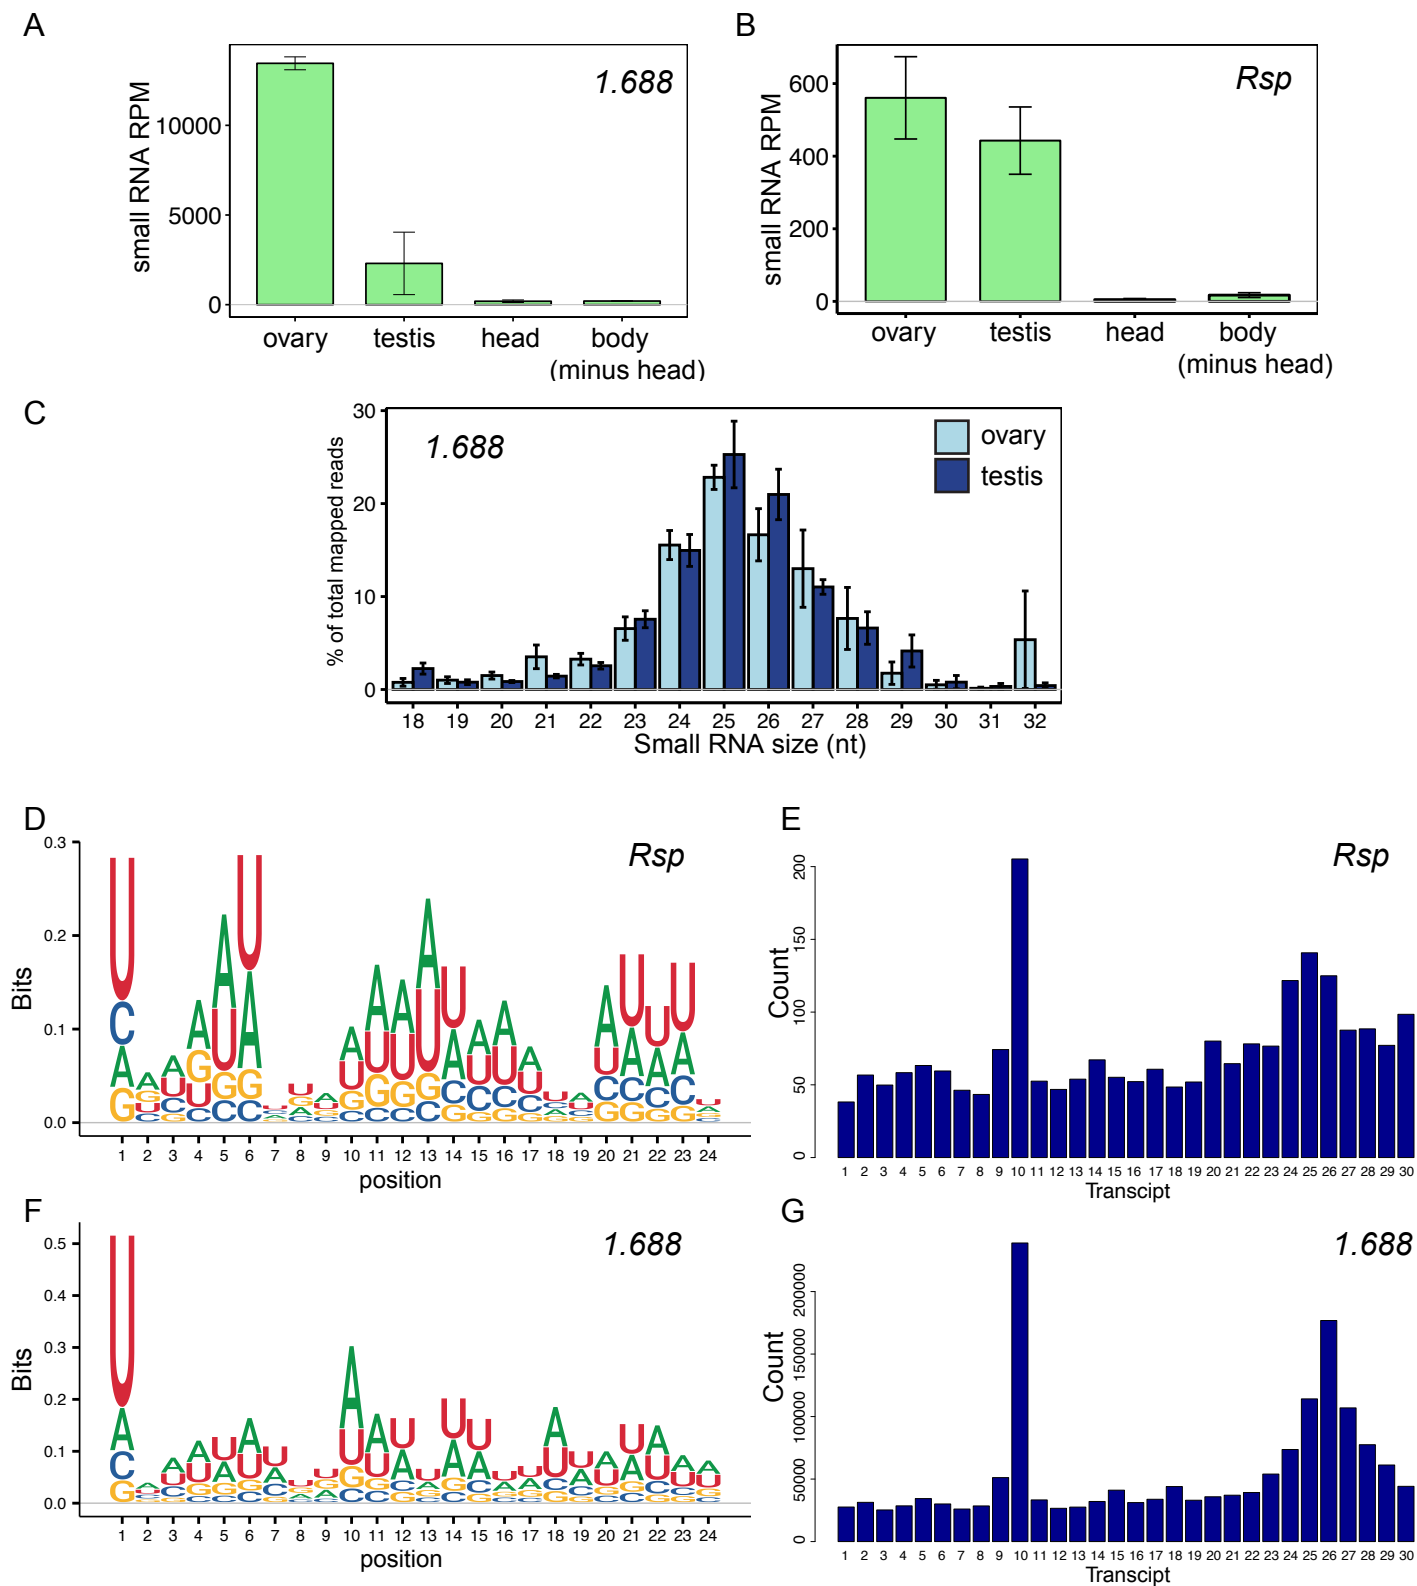

Supplement: supp [file elife-62375-supp-v1.zip]

Figure 2-figure supplement 4

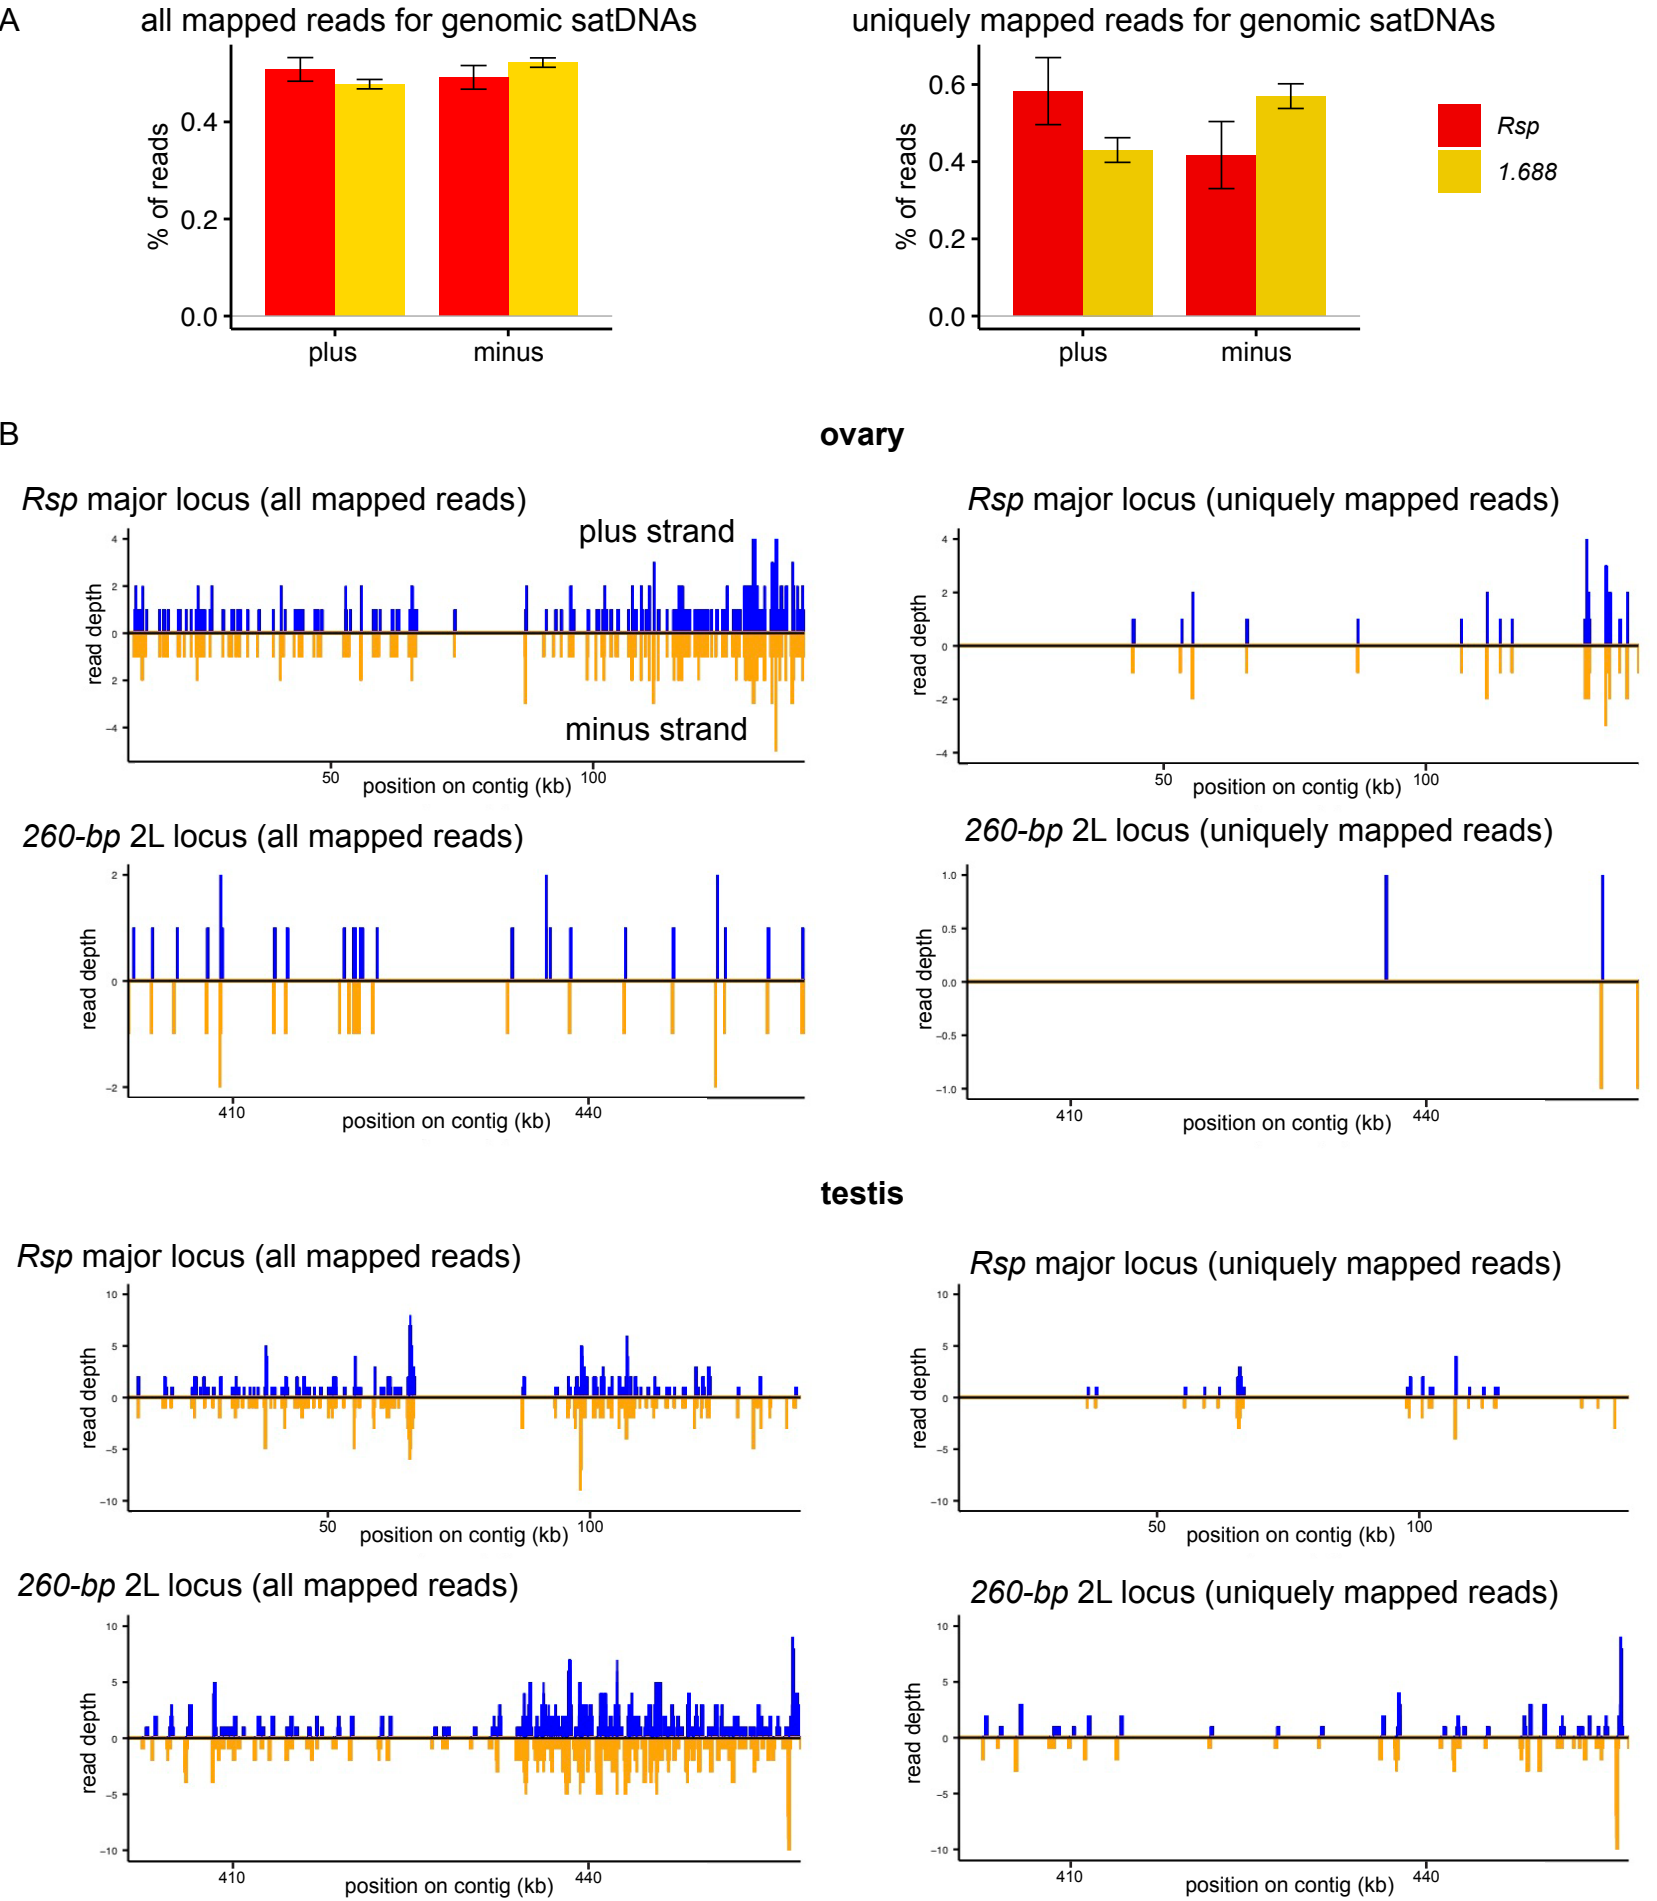

Supplement: supp [file elife-62375-supp-v1.zip]

Figure 1-figure supplement 1

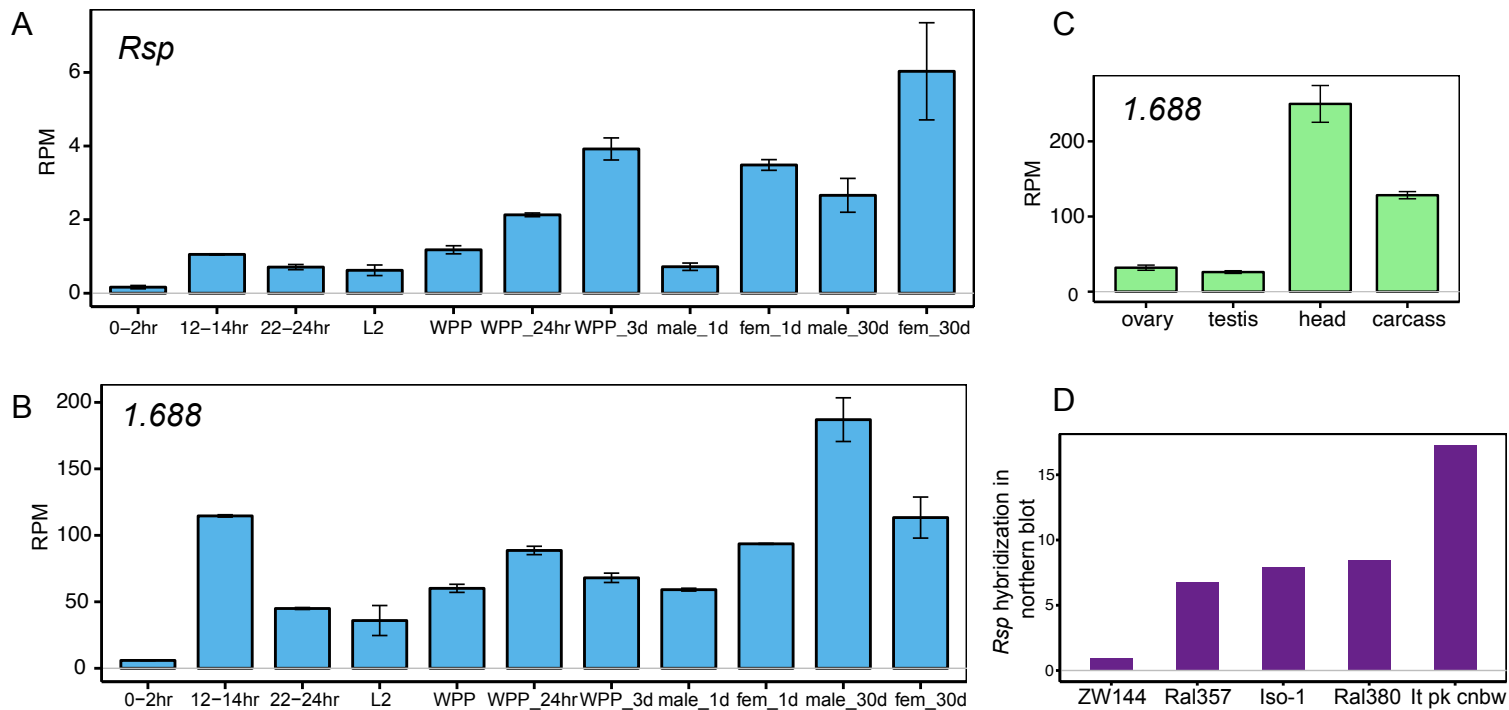

Supplement: supp [file elife-62375-supp-v1.zip]

Figure 2-figure supplement 3

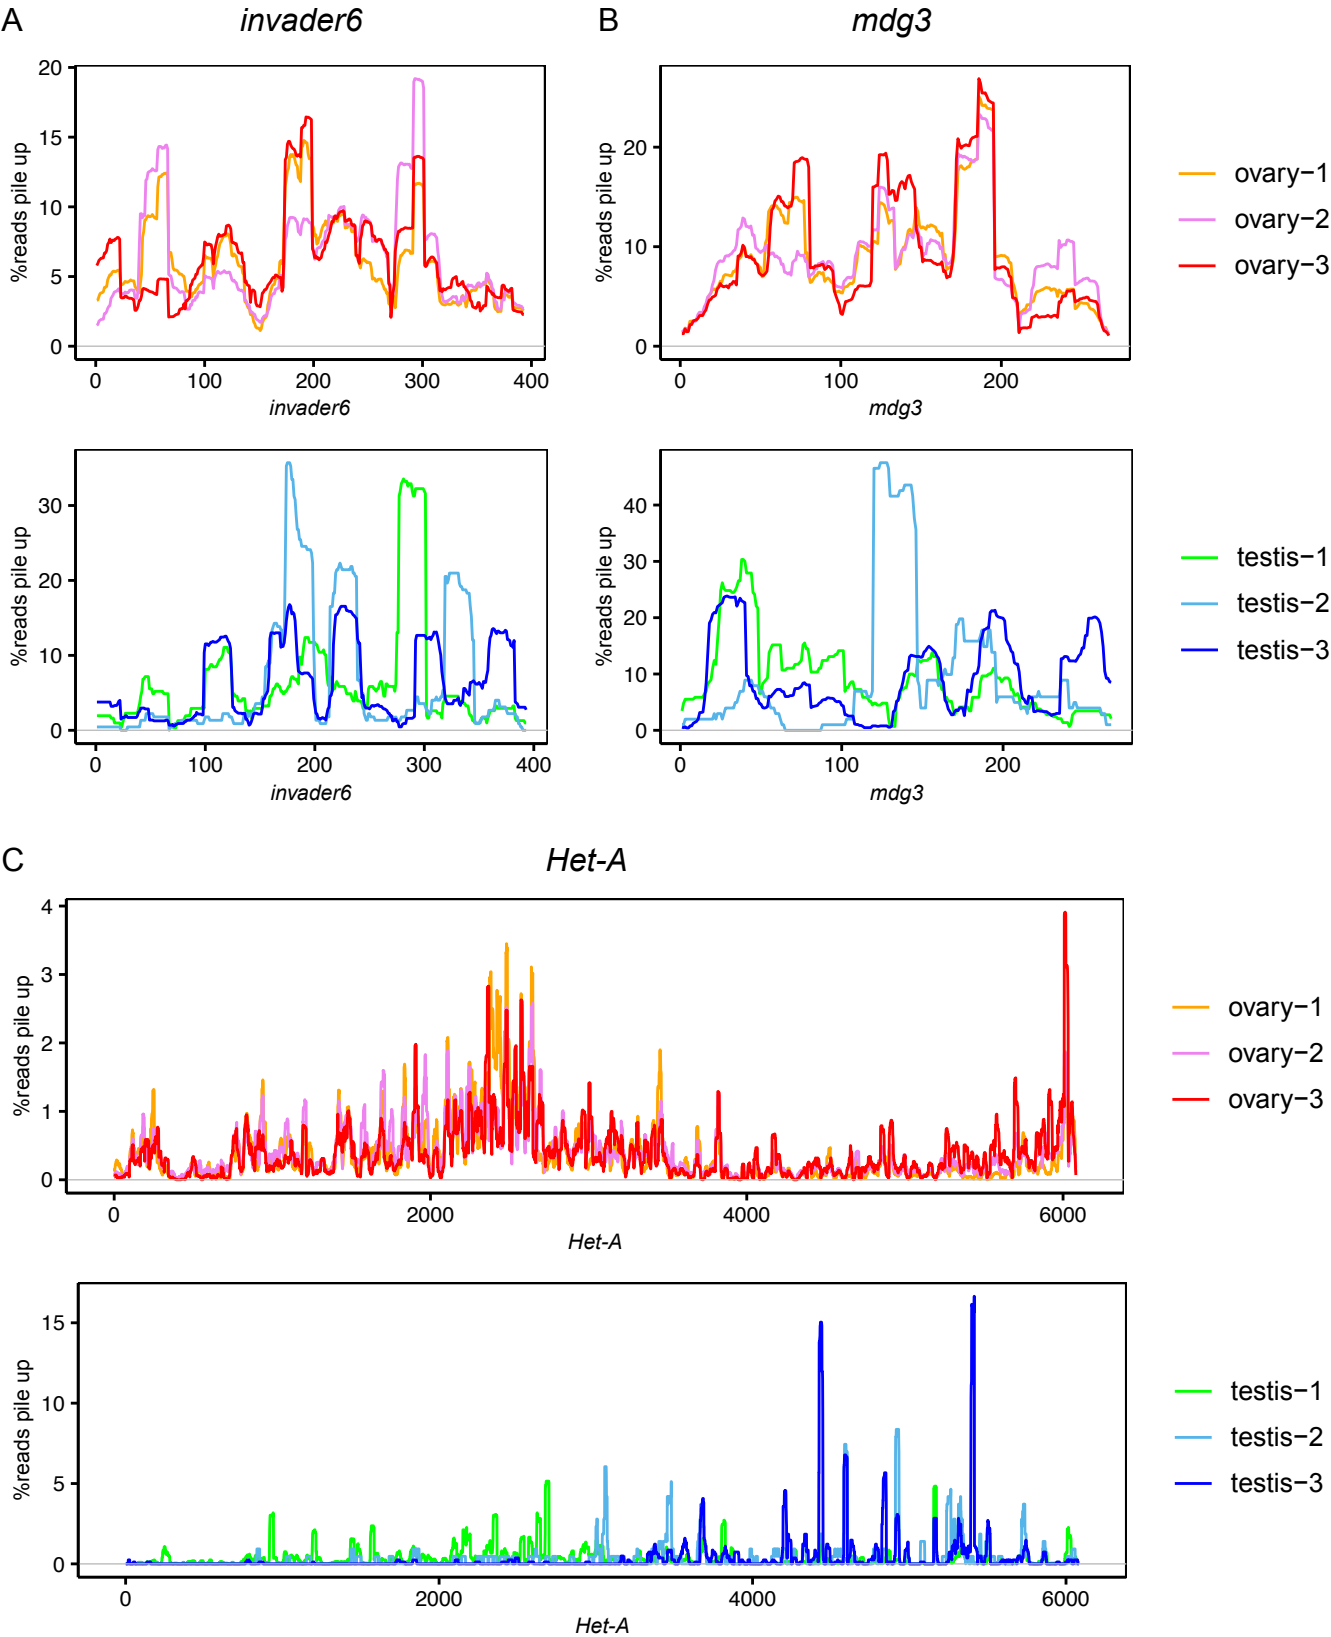

Supplement: supp [file elife-62375-supp-v1.zip]

Figure 2-figure supplement 5

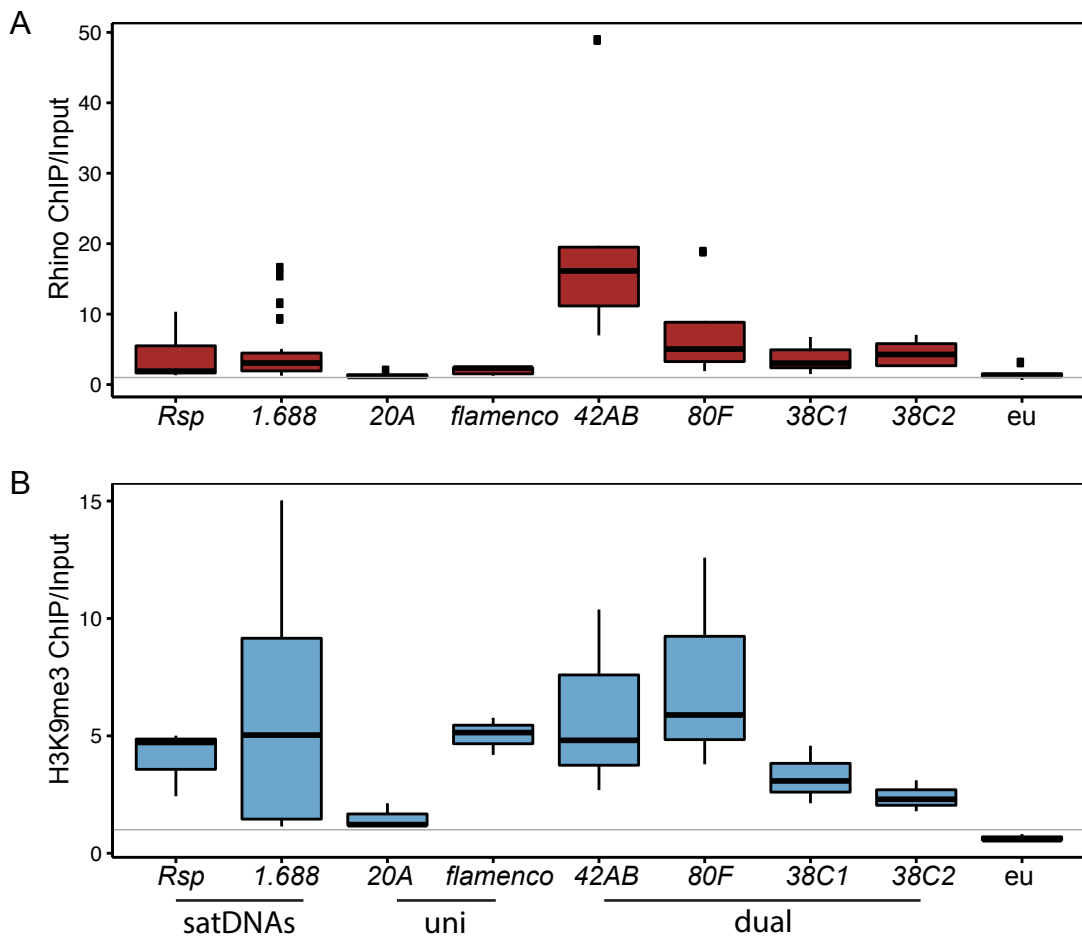

Supplement: supp [file elife-62375-supp-v1.zip › elife_poa_e62375_Figure_2_figure_supplement_5.pdf]
